# Supplementary material
Source: publisher figshare collection journal article supplement (https://gsajournals.figshare.com/ndownloader/files/22015041)
Supplement: Supplementary file 1 [file 22015041]

## Sheet: List_of_genes
gene_id	gene_description	gene_name	baseMeanCPM_KT_60	baseMeanCPM_V_60	FC	logFC	logCPM	LR	PValue	FDR	transcript_count	gene_biotype	zfin_id_id	Entrez_id	Uniprot_id	go_id	go_term	go_ontology	interpro_family	interpro_family_description	goslim_goa_accession	goslim_goa_description	kegg_path_enzyme
ENSONIG00000012591			4.29939	9.71043	-2.26413	-1.17895	2.78745	20.8942	4.85368e-06	0.085352	1	protein_coding				GO:0005516;GO:0006813;GO:0016021;GO:0015269;GO:0016286;GO:0016020;GO:0071805	calmodulin binding;potassium ion transport;integral component of membrane;calcium-activated potassium channel activity;small conductance calcium-activated potassium channel activity;membrane;potassium ion transmembrane transport	molecular_function;biological_process;cellular_component	PTHR10153	SMALL CONDUCTANCE CALCIUM ACTIVATED POTASSIUM CHANNEL SKCA KCA2	GO:0005575;GO:0006810;GO:0003674;GO:0022857;GO:0055085	cellular_component;transport;molecular_function;transmembrane transporter activity;transmembrane transport
ENSONIG00000001900	transketolase	TKT	4.48266	2.05354	2.1481	1.10306	1.91611	17.8971	2.33173e-05	0.205018	1	protein_coding		100710574	I3J0J0	GO:0003824	catalytic activity	molecular_function	PTHR11624_SF59	TRANSKETOLASE TK EC_2.2.1.1	GO:0003674	molecular_function	00730+2.2.1.7;00900+2.2.1.7
ENSONIG00000003037	tetratricopeptide repeat domain 7A	ttc7a	1.79416	4.08707	-2.2847	-1.192	1.42923	14.2135	0.000163197	0.409975	2	protein_coding	ZDB-GENE-010319-27	100706044	I3J4L2;I3J4L1	GO:0005515	protein binding	molecular_function	PTHR23083_SF342	TETRATRICOPEPTIDE REPEAT 7A TPR REPEAT 7A	GO:0003674	molecular_function
ENSONIG00000005702	guanylyl cyclase-activating protein 1	guca1c	1.13628	2.90311	-2.55565	-1.35369	0.835773	15.0386	0.000105337	0.409975	1	protein_coding	ZDB-GENE-030829-1	100698069	I3JE94	GO:0005509;GO:0031284;GO:0008048	calcium ion binding;positive regulation of guanylate cyclase activity;calcium sensitive guanylate cyclase activator activity	molecular_function;biological_process	PTHR23055_SF37	CYCLASE	GO:0003674;GO:0043167;GO:0030234	molecular_function;ion binding;enzyme regulator activity
ENSONIG00000008214	low density lipoprotein receptor	ldlra	2.59884	5.02232	-1.93864	-0.955042	1.8899	15.0604	0.000104122	0.409975	1	protein_coding	ZDB-GENE-031217-1	100711286	I3JN97	GO:0005509;GO:0005515;GO:0016020;GO:0016021;GO:0005623;GO:0005041;GO:0042632;GO:0071222;GO:0090118	calcium ion binding;protein binding;membrane;integral component of membrane;cell;low-density lipoprotein particle receptor activity;cholesterol homeostasis;cellular response to lipopolysaccharide;receptor-mediated endocytosis involved in cholesterol transport	molecular_function;cellular_component;biological_process	PTHR10529_SF99	LOW DENSITY LIPOPROTEIN RECEPTOR RELATED 8 PRECURSOR LRP 8 APOLIPOPROTEIN E RECEPTOR 2	GO:0003674;GO:0043167;GO:0005575;GO:0005623;GO:0042592;GO:0006810;GO:0016192	molecular_function;ion binding;cellular_component;cell;homeostatic process;transport;vesicle-mediated transport
ENSONIG00000008877	sodium channel, voltage-gated, type I-like, alpha	scn1laa (1 of many)	0.209055	1.31257	-6.50646	-2.70187	-0.54081	14.3004	0.000155828	0.409975	1	protein_coding	ZDB-GENE-040426-751			GO:0001518;GO:0006814;GO:0005216;GO:0006811;GO:0055085;GO:0016020;GO:0005248;GO:0016021;GO:0005244;GO:0034220;GO:0034765;GO:0005886;GO:0005272;GO:0035725	voltage-gated sodium channel complex;sodium ion transport;ion channel activity;ion transport;transmembrane transport;membrane;voltage-gated sodium channel activity;integral component of membrane;voltage-gated ion channel activity;ion transmembrane transport;regulation of ion transmembrane transport;plasma membrane;sodium channel activity;sodium ion transmembrane transport	cellular_component;biological_process;molecular_function	PTHR10037_SF185	SODIUM CHANNEL	GO:0005575;GO:0006810;GO:0055085;GO:0022857;GO:0003674;GO:0032991;GO:0005886	cellular_component;transport;transmembrane transport;transmembrane transporter activity;molecular_function;protein-containing complex;plasma membrane
ENSONIG00000012703	ubiquitin specific peptidase like 1	uspl1	39.8988	52.8296	-1.32539	-0.406421	5.5259	14.8463	0.000116634	0.409975	1	protein_coding	ZDB-GENE-040930-7			GO:0030576;GO:0032183;GO:0070140;GO:0016926;GO:0015030	Cajal body organization;SUMO binding;SUMO-specific isopeptidase activity;protein desumoylation;Cajal body	biological_process;molecular_function;cellular_component	PTHR15294	SUMO SPECIFIC ISOPEPTIDASE USPL1 EC_3.4.22.- UBIQUITIN SPECIFIC PEPTIDASE 1	GO:0003674;GO:0032182;GO:0006464;GO:0005575	molecular_function;ubiquitin-like protein binding;cellular protein modification process;cellular_component
ENSONIG00000016230			3.60719	1.61725	2.25883	1.17557	1.47643	13.1608	0.000285867	0.628371	1	protein_coding				GO:0006468;GO:0004672;GO:0005524;GO:0005515;GO:0016301;GO:0016310	protein phosphorylation;protein kinase activity;ATP binding;protein binding;kinase activity;phosphorylation	biological_process;molecular_function	PTHR22964_SF49	MYOSIN LIGHT CHAIN KINASE SMOOTH MUSCLE	GO:0003674;GO:0043167;GO:0016301;GO:0006464	molecular_function;ion binding;kinase activity;cellular protein modification process
ENSONIG00000019550	matrilin 3b	matn3b	10.0543	15.7958	-1.5726	-0.653152	3.75494	12.8207	0.000342801	0.669796	1	protein_coding	ZDB-GENE-050221-9			GO:0005509	calcium ion binding	molecular_function	PTHR22992_SF15	MATRILIN 3 PRECURSOR	GO:0003674;GO:0043167	molecular_function;ion binding
ENSONIG00000007231	2-aminoethanethiol dioxygenase	adoa	28.1616	36.5565	-1.2967	-0.374842	5.05278	12.0825	0.000508978	0.695008	1	protein_coding	ZDB-GENE-041212-62	100711871	I3JJS3	GO:0016702;GO:0055114	oxidoreductase activity, acting on single donors with incorporation of molecular oxygen, incorporation of two atoms of oxygen;oxidation-reduction process	molecular_function;biological_process	PTHR22966	2 AMINOETHANETHIOL DIOXYGENASE EC_1.13.11.19 CYSTEAMINE DIOXYGENASE
ENSONIG00000013779			16.0749	23.0074	-1.43139	-0.517417	4.20356	12.0056	0.000530403	0.695008	1	protein_coding				GO:0005882;GO:0005198	intermediate filament;structural molecule activity	cellular_component;molecular_function	PTHR23239_SF158	PRELAMIN A/C PRECURSOR[CONTAINS LAMIN	GO:0003674;GO:0005198;GO:0005575	molecular_function;structural molecule activity;cellular_component
ENSONIG00000018912			18.6359	25.2491	-1.35659	-0.439984	4.45336	12.1671	0.000486393	0.695008	2	protein_coding				GO:0003676	nucleic acid binding	molecular_function	PTHR24402_SF162	WIZ WIDELY INTERSPACED ZINC FINGER CONTAINING	GO:0003674	molecular_function
ENSONIG00000022043			0.147319	27.225	-175.861	-7.45829	3.42013	11.9268	0.000553319	0.695008	1	miRNA
ENSONIG00000022885			2.6237	5.65343	-2.15366	-1.10679	2.01144	12.5005	0.000406851	0.695008	2	lincRNA
ENSONIG00000019254	diacylglycerol kinase alpha	dgkab	1.14517	2.74138	-2.36861	-1.24404	0.965531	11.5717	0.000669643	0.785045	2	protein_coding	ZDB-GENE-121105-5	100691250	I3KSY6;I3KSY7	GO:0016301;GO:0035556;GO:0005509;GO:0007165;GO:0003951;GO:0004143;GO:0007205;GO:0016740;GO:0000166;GO:0005524;GO:0016310	kinase activity;intracellular signal transduction;calcium ion binding;signal transduction;NAD+ kinase activity;diacylglycerol kinase activity;protein kinase C-activating G protein-coupled receptor signaling pathway;transferase activity;nucleotide binding;ATP binding;phosphorylation	molecular_function;biological_process	PTHR11255_SF38	DIACYLGLYCEROL KINASE ALPHA DAG KINASE ALPHA EC_2.7.1.107.80 KDA DIACYLGLYCEROL KINASE DIGLYCERIDE KINASE ALPHA DGK ALPHA	GO:0007165;GO:0003674;GO:0043167;GO:0016301	signal transduction;molecular_function;ion binding;kinase activity	00564+2.7.1.107;00561+2.7.1.107;04070+2.7.1.107
ENSONIG00000017906	BTB/POZ domain-containing protein KCTD16	kctd16a	15.2297	10.3585	1.46752	0.553383	3.80862	11.2101	0.000813515	0.894104	1	protein_coding	ZDB-GENE-060117-1	100701092	I3KN73	GO:0051260;GO:0005515	protein homooligomerization;protein binding	biological_process;molecular_function	PTHR14499_SF28	BTB/POZ DOMAIN CONTAINING KCTD16	GO:0003674;GO:0022607;GO:0065003	molecular_function;cellular component assembly;protein-containing complex assembly
ENSONIG00000009761	lysine demethylase 5A	kdm5a	37.3254	28.8856	1.29549	0.373501	5.08361	11.0655	0.000879504	0.906256	2	protein_coding	ZDB-GENE-150114-1	100701637	I3JTR7;I3JTR8	GO:0003677;GO:0005634;GO:0046872	DNA binding;nucleus;metal ion binding	molecular_function;cellular_component	PTHR10694_SF17	LYSINE SPECIFIC DEMETHYLASE 5A EC_1.14.11.- HISTONE DEMETHYLASE JARID1A JUMONJI/ARID DOMAIN CONTAINING 1A RETINOBLASTOMA BINDING 2 RBBP 2	GO:0003674;GO:0003677;GO:0005575;GO:0043226;GO:0005634;GO:0043167	molecular_function;DNA binding;cellular_component;organelle;nucleus;ion binding
ENSONIG00000010972	adhesion G protein-coupled receptor D1	adgrd1	0.1984	1.6961	-7.78739	-2.96114	-0.0164521	10.9667	0.000927643	0.906256	2	protein_coding	ZDB-GENE-041212-24	100699024	I3JY62;I3JY61	GO:0004888;GO:0007166;GO:0016021;GO:0007186;GO:0004930;GO:0016020	transmembrane signaling receptor activity;cell surface receptor signaling pathway;integral component of membrane;G protein-coupled receptor signaling pathway;G protein-coupled receptor activity;membrane	molecular_function;biological_process;cellular_component	PTHR12011_SF216	ADHESION G COUPLED RECEPTOR D1 PRECURSOR G COUPLED RECEPTOR 133 G COUPLED RECEPTOR PGR25	GO:0003674;GO:0007165;GO:0005575	molecular_function;signal transduction;cellular_component
ENSONIG00000009701	translocase of outer mitochondrial membrane 70	TOMM70	5.88796	1.29676	4.51324	2.17416	2.25222	10.8569	0.000984299	0.910994	1	protein_coding		100709999	I3JK64	GO:0005515;GO:0016020;GO:0016021	protein binding;membrane;integral component of membrane	molecular_function;cellular_component	PTHR22904_SF178	MITOCHONDRIAL IMPORT RECEPTOR SUBUNIT TOM70 MITOCHONDRIAL PRECURSOR PROTEINS IMPORT RECEPTOR TRANSLOCASE OF OUTER MEMBRANE 70 KDA SUBUNIT TRANSLOCASE OF OUTER MITOCHONDRIAL MEMBRANE 70	GO:0003674;GO:0005575	molecular_function;cellular_component
ENSONIG00000004196	chromosome transmission fidelity factor 8	chtf8	2.91209	5.22307	-1.80026	-0.848202	2.031	10.6099	0.00112483	0.989004	2	protein_coding	ZDB-GENE-050419-148	100692719	I3J8U1;I3J8U0	GO:0007064;GO:0031390	mitotic sister chromatid cohesion;Ctf18 RFC-like complex	biological_process;cellular_component	TF314676	CHROMOSOME TRANSMISSION FIDELITY 8 HOMOLOG	GO:0051276;GO:0007059;GO:0032991;GO:0005575	chromosome organization;chromosome segregation;protein-containing complex;cellular_component
ENSONIG00000007597	D(4) dopamine receptor		43.8506	34.0287	1.28681	0.363797	5.31962	10.4276	0.00124146	0.992318	1	protein_coding		100704531	I3JL32	GO:0005887;GO:0016021;GO:0007186;GO:0004930;GO:0004952;GO:0007195;GO:0016020;GO:0007165	integral component of plasma membrane;integral component of membrane;G protein-coupled receptor signaling pathway;G protein-coupled receptor activity;dopamine neurotransmitter receptor activity;adenylate cyclase-inhibiting dopamine receptor signaling pathway;membrane;signal transduction	cellular_component;biological_process;molecular_function	PTHR24249_SF37	D 4 DOPAMINE RECEPTOR D 2C DOPAMINE RECEPTOR DOPAMINE D4 RECEPTOR	GO:0003674;GO:0007165;GO:0005575	molecular_function;signal transduction;cellular_component
ENSONIG00000019841			1.71467	3.63691	-2.11528	-1.08085	1.47948	10.5028	0.00119197	0.992318	1	protein_coding				GO:0005515	protein binding	molecular_function	PTHR24197_SF2	ANKYRIN REPEAT DOMAIN CONTAINING 61	GO:0003674	molecular_function
ENSONIG00000000001	liprin-beta-1	ppfibp1a	97.9548	89.3911	1.0968	0.133301	6.56857	2.28155	0.130921	0.999804	2	protein_coding	ZDB-GENE-041210-298	100695320	I3ITR2;I3ITR3	GO:0005515	protein binding	molecular_function	PTHR12587	LIPRIN ALPHA TYROSINE PHOSPHATASE RECEPTOR TYPE F POLYPEPTIDE INTERACTING ALPHA PTPRF INTERACTING ALPHA	GO:0003674	molecular_function
ENSONIG00000000002	NADH-cytochrome b5 reductase 3	cyb5r3	74.8115	69.2463	1.08128	0.112745	6.16949	1.24511	0.264489	0.999804	1	protein_coding	ZDB-GENE-030131-3281	100694258	I3ITR4	GO:0055114;GO:0016491;GO:0004128	oxidation-reduction process;oxidoreductase activity;cytochrome-b5 reductase activity, acting on NAD(P)H	biological_process;molecular_function	PTHR19370_SF80	NADH CYTOCHROME B5 REDUCTASE 3 B5R CYTOCHROME B5 REDUCTASE EC_1.6.2.2 DIAPHORASE 1 [CONTAINS NADH CYTOCHROME B5 REDUCTASE 3 MEMBRANE BOUND FORM; NADH CYTOCHROME B5 REDUCTASE 3 SOLUBLE FORM]	GO:0016491	oxidoreductase activity
ENSONIG00000000003	synaptotagmin 1	syt1a	1817.21	1800.54	1.00924	0.0132635	10.827	0.0174261	0.894978	0.999804	1	protein_coding	ZDB-GENE-040718-165	100695586	I3ITR5	GO:0008021;GO:0007269;GO:0005544;GO:0016020;GO:0016021	synaptic vesicle;neurotransmitter secretion;calcium-dependent phospholipid binding;membrane;integral component of membrane	cellular_component;biological_process;molecular_function	PTHR10024_SF183	SYNAPTOTAGMIN 1 SYNAPTOTAGMIN I SYTI	GO:0005575;GO:0003674;GO:0043167;GO:0008289;GO:0006810;GO:0043226;GO:0031410	cellular_component;molecular_function;ion binding;lipid binding;transport;organelle;cytoplasmic vesicle
ENSONIG00000000004	pro-apoptotic WT1 regulator	pawr	41.0399	39.5942	1.03785	0.0535983	5.35937	0.160947	0.688286	0.999804	2	protein_coding	ZDB-GENE-041010-108	100695853	I3ITR7;I3ITR6	GO:0006915;GO:0043114	apoptotic process;regulation of vascular permeability	biological_process	PTHR15093	PRKC APOPTOSIS WT1 REGULATOR PROSTATE APOPTOSIS RESPONSE 4 PAR 4	GO:0008219;GO:0008150;GO:0003013	cell death;biological_process;circulatory system process
ENSONIG00000000005	protein phosphatase 1, regulatory subunit 12A	ppp1r12a	101.298	94.833	1.06799	0.0948985	6.60026	0.543626	0.460934	0.999804	1	protein_coding	ZDB-GENE-041011-3			GO:0007165;GO:0019208;GO:0019901;GO:0005515;GO:0050790	signal transduction;phosphatase regulator activity;protein kinase binding;protein binding;regulation of catalytic activity	biological_process;molecular_function	PTHR24179_SF20	PHOSPHATASE 1 REGULATORY SUBUNIT 12A MYOSIN PHOSPHATASE TARGETING SUBUNIT 1 MYOSIN PHOSPHATASE TARGET SUBUNIT 1 PHOSPHATASE MYOSIN BINDING SUBUNIT	GO:0003674;GO:0019899;GO:0030234;GO:0007165;GO:0008150	molecular_function;enzyme binding;enzyme regulator activity;signal transduction;biological_process
ENSONIG00000000006	ribosomal protein S16	rps16	148.74	141.403	1.05179	0.0728408	7.23492	0.175488	0.67528	0.999804	1	protein_coding	ZDB-GENE-050506-107	100703910	I3ITR9	GO:0005840;GO:0006412;GO:0003735	ribosome;translation;structural constituent of ribosome	cellular_component;biological_process;molecular_function	PTHR21569_SF4	40S RIBOSOMAL S16	GO:0003674;GO:0005198;GO:0003735;GO:0009058;GO:0034641;GO:0006412;GO:0032991;GO:0005575;GO:0043226;GO:0005840	molecular_function;structural molecule activity;structural constituent of ribosome;biosynthetic process;cellular nitrogen compound metabolic process;translation;protein-containing complex;cellular_component;organelle;ribosome
ENSONIG00000000009	golgin B1	golgb1	53.6536	50.4103	1.0616	0.0862387	5.70816	0.498913	0.479978	0.999804	1	protein_coding	ZDB-GENE-030429-9			GO:0005794	Golgi apparatus	cellular_component	PTHR18887	GOLGIN SUBFAMILY B MEMBER 1.372 KDA GOLGI COMPLEX ASSOCIATED GCP372 GIANTIN MACROGOLGIN	GO:0005575;GO:0043226;GO:0005794	cellular_component;organelle;Golgi apparatus
ENSONIG00000000012	peroxisomal biogenesis factor 26	pex26	5.56484	5.03631	1.10278	0.141139	2.51326	0.361814	0.547501	0.999804	1	protein_coding	ZDB-GENE-030131-6584			GO:0005779;GO:0045046;GO:0044877	integral component of peroxisomal membrane;protein import into peroxisome membrane;protein-containing complex binding	cellular_component;biological_process;molecular_function	PTHR16262	PEROXISOME ASSEMBLY 26 PEROXIN 26	GO:0003674;GO:0006810;GO:0006605;GO:0005575	molecular_function;transport;protein targeting;cellular_component
ENSONIG00000000013	ubl carboxyl-terminal hydrolase 18	usp18	6.23781	14.9488	-2.39498	-1.26001	3.57162	2.05506	0.151701	0.999804	2	protein_coding	ZDB-GENE-100210-2	100700930	I3ITS8;I3ITS7	GO:0006511;GO:0016579;GO:0036459;GO:1904888	ubiquitin-dependent protein catabolic process;protein deubiquitination;thiol-dependent ubiquitinyl hydrolase activity;cranial skeletal system development	biological_process;molecular_function	PTHR24619_SF61	UBIQUITIN SPECIFIC PEPTIDASE 18	GO:0006464;GO:0009056;GO:0048856	cellular protein modification process;catabolic process;anatomical structure development
ENSONIG00000000014	G1/S-specific cyclin-D2		29.2798	27.3334	1.0686	0.0957211	4.79033	0.484072	0.486584	0.999804	1	protein_coding		100707642	I3ITS9	GO:0005634	nucleus	cellular_component	PTHR10177_SF66	G1/S SPECIFIC CYCLIN D2	GO:0005575;GO:0043226;GO:0005634	cellular_component;organelle;nucleus
ENSONIG00000000015	tp53-induced glycolysis and apoptosis regulator b	tigarb	13.051	13.7556	-1.05859	-0.0821387	3.78263	0.313422	0.575588	0.999804	1	protein_coding	ZDB-GENE-040426-885						PTHR23029_SF19	FRUCTOSE 2 6 BISPHOSPHATASE TIGAR EC_3.1.3.46 TP53 INDUCED GLYCOLYSIS AND APOPTOSIS REGULATOR
ENSONIG00000000017	fibroblast growth factor 6	FGF6 (1 of many)	4.0788	3.56068	1.15218	0.204363	2.00956	0.319269	0.572047	0.999804	1	protein_coding		100708453	I3ITT2	GO:0008083;GO:0010469	growth factor activity;regulation of signaling receptor activity	molecular_function;biological_process	PTHR11486_SF25	FIBROBLAST GROWTH FACTOR 6 PRECURSOR FGF 6 HEPARIN SECRETORY TRANSFORMING 2 HST 2 HSTF 2 HEPARIN BINDING GROWTH FACTOR 6 HBGF 6	GO:0003674;GO:0008150	molecular_function;biological_process
ENSONIG00000000019	exportin 1 (CRM1 homolog, yeast) a	xpo1a	84.9682	85.4701	-1.0075	-0.0107778	6.42676	0.00893603	0.924688	0.999804	2	protein_coding	ZDB-GENE-050309-201		I3ITT5;I3ITT4	GO:0005049;GO:0006886;GO:0008536;GO:0005634;GO:0051168;GO:0007420	nuclear export signal receptor activity;intracellular protein transport;Ran GTPase binding;nucleus;nuclear export;brain development	molecular_function;biological_process;cellular_component	PTHR11223	EXPORTIN 1 CHROMOSOME REGION MAINTENANCE 1	GO:0006810;GO:0003674;GO:0006913;GO:0005575;GO:0043226;GO:0005634;GO:0048856	transport;molecular_function;nucleocytoplasmic transport;cellular_component;organelle;nucleus;anatomical structure development
ENSONIG00000000021	ATPase H+ transporting V1 subunit E1	atp6v1e1b	462.345	435.908	1.06077	0.0851114	8.81771	0.895031	0.344118	0.999804	1	protein_coding	ZDB-GENE-020419-11	100708725	I3ITT7	GO:0033178;GO:0015991;GO:0046961;GO:0008900;GO:0031101;GO:0033336;GO:0060036;GO:0060041	proton-transporting two-sector ATPase complex, catalytic domain;ATP hydrolysis coupled proton transport;proton-transporting ATPase activity, rotational mechanism;potassium:proton exchanging ATPase activity;fin regeneration;caudal fin development;notochord cell vacuolation;retina development in camera-type eye	cellular_component;biological_process;molecular_function	PTHR11583	V TYPE PROTON ATPASE SUBUNIT E V ATPASE SUBUNIT E VACUOLAR PROTON PUMP SUBUNIT E	GO:0022857;GO:0003674;GO:0016887;GO:0006810;GO:0055085;GO:0032991;GO:0005575;GO:0048856;GO:0040007	transmembrane transporter activity;molecular_function;ATPase activity;transport;transmembrane transport;protein-containing complex;cellular_component;anatomical structure development;growth
ENSONIG00000000029	chaperonin containing TCP1 subunit 4	cct4	195.725	186.386	1.05038	0.070907	7.5812	0.355799	0.550848	0.999804	1	protein_coding	ZDB-GENE-040426-1421	100712490	I3ITU6	GO:0006457;GO:0051082;GO:0005524;GO:0000166;GO:0001666;GO:0005737	protein folding;unfolded protein binding;ATP binding;nucleotide binding;response to hypoxia;cytoplasm	biological_process;molecular_function;cellular_component	PTHR11353_SF26	T COMPLEX 1 SUBUNIT DELTA TCP 1 DELTA CCT DELTA	GO:0003674;GO:0043167;GO:0051082;GO:0006457;GO:0006950;GO:0005575;GO:0005737	molecular_function;ion binding;unfolded protein binding;protein folding;response to stress;cellular_component;cytoplasm
ENSONIG00000000031	transcription factor Spi-C	spic	1.23613	0.770024	1.62033	0.696292	0.174969	1.2117	0.270995	0.999804	1	protein_coding	ZDB-GENE-040912-47	100702561	I3ITU8	GO:0043565;GO:0003700;GO:0006355;GO:0003677;GO:0005634	sequence-specific DNA binding;DNA-binding transcription factor activity;regulation of transcription, DNA-templated;DNA binding;nucleus	molecular_function;biological_process;cellular_component	PTHR11849_SF17	TRANSCRIPTION FACTOR SPI C	GO:0003674;GO:0003700;GO:0003677;GO:0005575;GO:0043226;GO:0005634	molecular_function;DNA-binding transcription factor activity;DNA binding;cellular_component;organelle;nucleus
ENSONIG00000000033	transmembrane protein 185A	tmem185	62.1721	55.2978	1.12363	0.168162	5.95778	2.78226	0.0953134	0.999804	1	protein_coding	ZDB-GENE-040426-1167	100712057	I3ITV0	GO:0016020;GO:0016021	membrane;integral component of membrane	cellular_component	PTHR13568_SF2	TRANSMEMBRANE 185A FAM11A	GO:0005575	cellular_component
ENSONIG00000000035	MUS81 structure-specific endonuclease subunit	mus81	2.88408	3.27063	-1.15156	-0.203592	1.85429	0.457599	0.498748	0.999804	1	protein_coding	ZDB-GENE-040426-2923	100690345	I3ITV3	GO:0004518;GO:0003677;GO:0090305	nuclease activity;DNA binding;nucleic acid phosphodiester bond hydrolysis	molecular_function;biological_process	PTHR13451	CROSSOVER JUNCTION ENDONUCLEASE MUS81 EC_3.1.22.-	GO:0003674;GO:0003677;GO:0004518;GO:0034641	molecular_function;DNA binding;nuclease activity;cellular nitrogen compound metabolic process
ENSONIG00000000036	pseudouridine synthase 10	pus10	19.858	18.9908	1.04653	0.0656102	4.28428	0.244986	0.620628	0.999804	2	protein_coding	ZDB-GENE-080204-5	100690402	I3ITV5;I3ITV4	GO:0009451;GO:0001522;GO:0003723;GO:0009982	RNA modification;pseudouridine synthesis;RNA binding;pseudouridine synthase activity	biological_process;molecular_function	PTHR21568	TRNA PSEUDOURIDINE SYNTHASE PUS10 EC_5.4.99.25 COILED COIL DOMAIN CONTAINING 139 TRNA PSEUDOURIDINE 55 SYNTHASE PSI55 SYNTHASE TRNA PSEUDOURIDYLATE SYNTHASE TRNA URIDINE ISOMERASE	GO:0003674;GO:0003723;GO:0016853;GO:0034641	molecular_function;RNA binding;isomerase activity;cellular nitrogen compound metabolic process
ENSONIG00000000038	RAC-gamma serine/threonine-protein kinase	akt3b	366.858	383.482	-1.04548	-0.0641624	8.52153	0.373247	0.54124	0.999804	1	protein_coding	ZDB-GENE-110309-3	100692017	I3ITV8	GO:0004674;GO:0006468;GO:0004672;GO:0005524;GO:0016740;GO:0000166;GO:0016301;GO:0016310	protein serine/threonine kinase activity;protein phosphorylation;protein kinase activity;ATP binding;transferase activity;nucleotide binding;kinase activity;phosphorylation	molecular_function;biological_process	PTHR24352_SF49	NON SPECIFIC SERINE/THREONINE KINASE EC_2.7.11.1	GO:0003674;GO:0043167;GO:0016301;GO:0006464	molecular_function;ion binding;kinase activity;cellular protein modification process	04151+2.7.11.1;04150+2.7.11.1;05165+2.7.11.1;04926+2.7.11.1;04714+2.7.11.1;05170+2.7.11.1;05163+2.7.11.1
ENSONIG00000000042	LTV1 ribosome biogenesis factor	ltv1	14.8011	13.7313	1.07072	0.0985753	3.93863	0.582941	0.445162	0.999804	1	protein_coding	ZDB-GENE-040712-1						PTHR21531_SF0	LTV1
ENSONIG00000000043	calpain 9	capn9	0.84923	1.29694	-1.51575	-0.600036	0.0497032	1.1104	0.291996	0.999804	1	protein_coding	ZDB-GENE-010724-2	100701034	I3ITW3	GO:0007586;GO:0005622;GO:0006508;GO:0004198;GO:0005509;GO:0008233;GO:0008234;GO:0016787	digestion;intracellular;proteolysis;calcium-dependent cysteine-type endopeptidase activity;calcium ion binding;peptidase activity;cysteine-type peptidase activity;hydrolase activity	biological_process;cellular_component;molecular_function	PTHR10183_SF136	CALPAIN 9 EC_3.4.22.- DIGESTIVE TRACT SPECIFIC CALPAIN NEW CALPAIN 4 NCL 4	GO:0003674;GO:0043167;GO:0005575;GO:0005622;GO:0008233	molecular_function;ion binding;cellular_component;intracellular;peptidase activity
ENSONIG00000000046	R-spondin 2	rspo2	5.46593	6.53956	-1.19062	-0.251714	2.67856	0.702887	0.401815	0.999804	2	protein_coding	ZDB-GENE-060503-667	100691669	I3ITW7;I3ITW6	GO:0001501;GO:0033335;GO:0033336;GO:0033337;GO:0033338;GO:0033339;GO:0033340	skeletal system development;anal fin development;caudal fin development;dorsal fin development;medial fin development;pectoral fin development;pelvic fin development	biological_process	PTHR23275_SF2	R SPONDIN 2 PRECURSOR ROOF PLATE SPECIFIC SPONDIN 2	GO:0048856	anatomical structure development
ENSONIG00000000047	eukaryotic translation initiation factor 3 subunit E-A	eif3ea	133.579	135.862	-1.01757	-0.0251296	7.09463	0.0569708	0.811349	0.999804	1	protein_coding	ZDB-GENE-030131-3827	100691937	I3ITW8	GO:0005737;GO:0005852;GO:0003743;GO:0005634;GO:0001732;GO:0002183;GO:0006412;GO:0006413;GO:0016282;GO:0033290;GO:0071540	cytoplasm;eukaryotic translation initiation factor 3 complex;translation initiation factor activity;nucleus;formation of cytoplasmic translation initiation complex;cytoplasmic translational initiation;translation;translational initiation;eukaryotic 43S preinitiation complex;eukaryotic 48S preinitiation complex;eukaryotic translation initiation factor 3 complex, eIF3e	cellular_component;molecular_function;biological_process	PTHR10317	EUKARYOTIC TRANSLATION INITIATION FACTOR 3 SUBUNIT E EIF3E EUKARYOTIC TRANSLATION INITIATION FACTOR 3 SUBUNIT 6	GO:0003674;GO:0003723;GO:0008135;GO:0005575;GO:0005737;GO:0032991;GO:0043226;GO:0005634;GO:0022607;GO:0022618;GO:0065003;GO:0009058;GO:0034641;GO:0006412	molecular_function;RNA binding;translation factor activity, RNA binding;cellular_component;cytoplasm;protein-containing complex;organelle;nucleus;cellular component assembly;ribonucleoprotein complex assembly;protein-containing complex assembly;biosynthetic process;cellular nitrogen compound metabolic process;translation
ENSONIG00000000048	choline phosphotransferase 1	chpt1	41.6581	47.0693	-1.12717	-0.172699	5.42805	2.63036	0.104838	0.999804	1	protein_coding	ZDB-GENE-030131-1325	100703364	I3ITW9	GO:0008654;GO:0016780;GO:0016020;GO:0016021;GO:0016740	phospholipid biosynthetic process;phosphotransferase activity, for other substituted phosphate groups;membrane;integral component of membrane;transferase activity	biological_process;molecular_function;cellular_component	PTHR10414	1 EC_2.7.8.1	GO:0005575;GO:0009058;GO:0006629	cellular_component;biosynthetic process;lipid metabolic process
ENSONIG00000000049	ER membrane protein complex subunit 2	emc2	189.177	185.696	1.01866	0.0266672	7.56496	0.077815	0.780281	0.999804	1	protein_coding	ZDB-GENE-040625-82	100692205	I3ITX0	GO:0005515	protein binding	molecular_function	PTHR12760	ER MEMBRANE COMPLEX SUBUNIT 2 TETRATRICOPEPTIDE REPEAT 35 TPR REPEAT 35	GO:0003674	molecular_function
ENSONIG00000000050	N-acetylglucosamine-1-phosphate transferase subunits alpha and beta	gnptab	34.6186	37.3614	-1.07748	-0.107666	5.1142	0.693685	0.404914	0.999804	1	protein_coding	ZDB-GENE-030131-4714			GO:0016772;GO:0005509;GO:0016020;GO:0016021;GO:0005623;GO:0003976;GO:0002063;GO:0016256;GO:0048701;GO:0048703;GO:0051216;GO:0060348	transferase activity, transferring phosphorus-containing groups;calcium ion binding;membrane;integral component of membrane;cell;UDP-N-acetylglucosamine-lysosomal-enzyme N-acetylglucosaminephosphotransferase activity;chondrocyte development;N-glycan processing to lysosome;embryonic cranial skeleton morphogenesis;embryonic viscerocranium morphogenesis;cartilage development;bone development	molecular_function;cellular_component;biological_process	PTHR24045	N ACETYLGLUCOSAMINE 1 PHOSPHOTRANSFERASE SUBUNITS ALPHA/BETA PRECURSOR EC_2.7.8.17 GLCNAC 1 PHOSPHOTRANSFERASE SUBUNITS ALPHA/BETA STEALTH GNPTAB UDP N ACETYLGLUCOSAMINE 1 PHOSPHOTRANSFERASE SUBUNITS ALPHA/BETA [CONTAINS N ACETYLGLUCOSAMINE 1 PHOSPHOTRANSFERASE SUBUNIT ALPHA; N ACETYLGLUCOSAMINE 1 PHOSPHOTRANSFERASE SUBUNIT BETA]	GO:0003674;GO:0043167;GO:0005575;GO:0005623;GO:0048856;GO:0006810;GO:0007034;GO:0006605;GO:0009790	molecular_function;ion binding;cellular_component;cell;anatomical structure development;transport;vacuolar transport;protein targeting;embryo development
ENSONIG00000000051	thyrotropin-releasing hormone receptor	trhra	39.4563	34.8025	1.13128	0.177962	5.28025	0.785382	0.3755	0.999804	1	protein_coding	ZDB-GENE-100922-18	100692475	I3ITX2	GO:0004997;GO:0016021;GO:0007186;GO:0004930;GO:0016020;GO:0007165	thyrotropin-releasing hormone receptor activity;integral component of membrane;G protein-coupled receptor signaling pathway;G protein-coupled receptor activity;membrane;signal transduction	molecular_function;cellular_component;biological_process	PTHR24243	RECEPTOR	GO:0003674;GO:0007165;GO:0005575	molecular_function;signal transduction;cellular_component
ENSONIG00000000052	growth/differentiation factor 6-A	gdf6a	0.61883	0.450255	1.3541	0.437334	-0.343738	0.431011	0.511493	0.999804	2	protein_coding	ZDB-GENE-980526-373	100693017	I3ITX4;I3ITX3	GO:0008083;GO:0010469;GO:0005576;GO:0001895;GO:0001955;GO:0006915;GO:0009953;GO:0030510;GO:0030513;GO:0031076;GO:0031290;GO:0042127;GO:0042670;GO:0043010;GO:0046552;GO:0048264;GO:0048514;GO:0048706;GO:0048741;GO:0060041;GO:0060059;GO:0060219;GO:0061298;GO:1900747;GO:1990009	growth factor activity;regulation of signaling receptor activity;extracellular region;retina homeostasis;blood vessel maturation;apoptotic process;dorsal/ventral pattern formation;regulation of BMP signaling pathway;positive regulation of BMP signaling pathway;embryonic camera-type eye development;retinal ganglion cell axon guidance;regulation of cell population proliferation;retinal cone cell di…	molecular_function;biological_process;cellular_component	PTHR11848_SF43	GROWTH/DIFFERENTIATION FACTOR 6 PRECURSOR GDF 6 GROWTH DIFFERENTIATION FACTOR	GO:0003674;GO:0008150;GO:0005575;GO:0005576;GO:0042592;GO:0048856;GO:0021700;GO:0008219;GO:0030154;GO:0009790	molecular_function;biological_process;cellular_component;extracellular region;homeostatic process;anatomical structure development;developmental maturation;cell death;cell differentiation;embryo development
ENSONIG00000000053	DNA damage regulated autophagy modulator 1	dram1	0.241006	0.865304	-3.35118	-1.74467	-0.352139	9.38725	0.002185	0.999804	1	protein_coding	ZDB-GENE-041010-147	100703639	I3ITX5	GO:0016020;GO:0016021;GO:0010506;GO:0042742;GO:0005764	membrane;integral component of membrane;regulation of autophagy;defense response to bacterium;lysosome	cellular_component;biological_process	PTHR21324	TRANSMEMBRANE	GO:0005575;GO:0006950;GO:0005773;GO:0043226;GO:0005764	cellular_component;response to stress;vacuole;organelle;lysosome
ENSONIG00000000054	WASH complex subunit 3	washc3	6.87011	5.8398	1.17256	0.229662	2.76262	1.47362	0.224775	0.999804	1	protein_coding	ZDB-GENE-040426-783	100693454	I3ITX6	GO:0071203	WASH complex	cellular_component	PTHR13015_SF0	WASH COMPLEX SUBUNIT 3 COILED COIL DOMAIN CONTAINING 53	GO:0032991;GO:0005575	protein-containing complex;cellular_component
ENSONIG00000000055	syntabulin (syntaxin-interacting)	sybu	271.243	269.977	1.00478	0.0068751	8.12307	0.00493206	0.944012	0.999804	1	protein_coding	ZDB-GENE-060929-1202			GO:0019894;GO:0017075;GO:0048263;GO:0060828;GO:2000053	kinesin binding;syntaxin-1 binding;determination of dorsal identity;regulation of canonical Wnt signaling pathway;regulation of Wnt signaling pathway involved in dorsal/ventral axis specification	molecular_function;biological_process	PTHR16208	SYNTABULIN GOLGI LOCALIZED SYNTAPHILIN RELATED SYNTAXIN 1 BINDING	GO:0003674;GO:0008092	molecular_function;cytoskeletal protein binding
ENSONIG00000000056	estrogen receptor binding site associated, antigen, 9	ebag9	31.4045	29.8206	1.05331	0.0749255	4.95491	0.439009	0.507601	0.999804	1	protein_coding	ZDB-GENE-040426-1093	100693283	I3ITX8	GO:0016021;GO:0005794;GO:0006915;GO:0000139	integral component of membrane;Golgi apparatus;apoptotic process;Golgi membrane	cellular_component;biological_process	PTHR15208	RECEPTOR BINDING CANCER ANTIGEN EXPRESSED ON SISO CELLS CANCER ASSOCIATED SURFACE ANTIGEN RCAS1 ESTROGEN RECEPTOR BINDING FRAGMENT ASSOCIATED GENE 9	GO:0005575;GO:0043226;GO:0005794;GO:0008219	cellular_component;organelle;Golgi apparatus;cell death
ENSONIG00000000057			13.1131	12.2059	1.08123	0.112678	3.62319	0.543567	0.460958	0.999804	1	protein_coding				GO:0003676	nucleic acid binding	molecular_function	PTHR24377_SF211	ZINC FINGER 32 ZINC FINGER	GO:0003674	molecular_function
ENSONIG00000000058	differentially expressed in FDCP 6 homolog	def6c	3.7529	4.06209	-1.09608	-0.132354	2.07622	0.177081	0.673894	0.999804	1	protein_coding	ZDB-GENE-060503-87	100693715	I3ITY0				PTHR14383	SWAP 70
ENSONIG00000000059	TTK protein kinase	ttk	3.04913	3.53444	-1.17159	-0.228468	1.76743	0.473518	0.491373	0.999804	2	protein_coding	ZDB-GENE-030123-1	100698249	I3ITY1;I3ITY2	GO:0051304;GO:0007093;GO:0004712;GO:0006468;GO:0004672;GO:0005524;GO:0005515	chromosome separation;mitotic cell cycle checkpoint;protein serine/threonine/tyrosine kinase activity;protein phosphorylation;protein kinase activity;ATP binding;protein binding	biological_process;molecular_function	PTHR22974	SERINE/THREONINE KINASE TOUSLED EC_2.7.11.1 TOUSLED KINASE	GO:0003674;GO:0043167;GO:0016301;GO:0006464	molecular_function;ion binding;kinase activity;cellular protein modification process
ENSONIG00000000060			1.51617	2.64226	-1.74106	-0.799968	1.11321	1.30619	0.253086	0.999804	1	protein_coding							PTHR15665	ASTEROID HOMOLOG 1
ENSONIG00000000061	TATA-box binding protein associated factor 5 like	taf5l	47.0376	47.3821	-1.00747	-0.0107352	5.52806	0.00701784	0.933237	0.999804	1	protein_coding	ZDB-GENE-030131-5987	100702122	I3ITY4	GO:0033276;GO:0030914;GO:0005515	transcription factor TFTC complex;STAGA complex;protein binding	cellular_component;molecular_function	PTHR19879	TRANSCRIPTION INITIATION FACTOR TFIID SUBUNIT TRANSCRIPTION INITIATION FACTOR TFIID KDA SUBUNIT TAFII	GO:0003674;GO:0032991;GO:0005575	molecular_function;protein-containing complex;cellular_component
ENSONIG00000000062	branched chain keto acid dehydrogenase E1 subunit beta	bckdhb	103.413	110.928	-1.07263	-0.101158	6.76806	0.842038	0.358815	0.999804	1	protein_coding	ZDB-GENE-030124-2	100693722	I3ITY5	GO:0003824	catalytic activity	molecular_function	PTHR11624_SF21	2 OXOISOVALERATE DEHYDROGENASE SUBUNIT BETA MITOCHONDRIAL PRECURSOR EC_1.2.4.4 BRANCHED CHAIN ALPHA KETO ACID DEHYDROGENASE E1 COMPONENT BETA CHAIN BCKDE1B BCKDH E1 BETA	GO:0003674	molecular_function
ENSONIG00000000063	nucleoporin 133	nup133	23.8221	26.6714	-1.11794	-0.160843	4.68887	1.57667	0.209241	0.999804	2	protein_coding	ZDB-GENE-040426-2941	100704548	I3ITY6;I3ITY7	GO:0017056;GO:0005515;GO:0005623;GO:0006913	structural constituent of nuclear pore;protein binding;cell;nucleocytoplasmic transport	molecular_function;cellular_component;biological_process	PTHR13405	NUCLEAR PORE	GO:0003674;GO:0006810;GO:0006913;GO:0005198;GO:0005575;GO:0005623	molecular_function;transport;nucleocytoplasmic transport;structural molecule activity;cellular_component;cell
ENSONIG00000000064	terminal nucleotidyltransferase 5A	TENT5A	3.22387	2.89795	1.09603	0.132283	1.70426	0.129993	0.718439	0.999804	1	protein_coding		100698511	I3ITY8	GO:1990817	RNA adenylyltransferase activity	molecular_function	PTHR12974_SF25	TERMINAL NUCLEOTIDYLTRANSFERASE 5A EC_2.7.7.- HBV X TRANSACTIVATED GENE 11 HBV XAG TRANSACTIVATED 11	GO:0016779	nucleotidyltransferase activity
ENSONIG00000000065	inhibitor of Bruton agammaglobulinemia tyrosine kinase	ibtk	92.7287	84.8236	1.09387	0.129435	6.50769	1.33472	0.247967	0.999804	1	protein_coding	ZDB-GENE-030131-6246			GO:0005515	protein binding	molecular_function	PTHR22872	INHIBITOR OF BRUTON TYROSINE KINASE IBTK	GO:0003674	molecular_function
ENSONIG00000000066	actin, alpha cardiac	acta1a	0.510734	1.16145	-2.25304	-1.17187	-0.0522654	4.66029	0.0308679	0.999804	1	protein_coding	ZDB-GENE-050417-267	100706681;100534411	I3ITZ0	GO:0000166;GO:0005524;GO:0048741	nucleotide binding;ATP binding;skeletal muscle fiber development	molecular_function;biological_process	PTHR11937_SF165	ACTIN ALPHA SKELETAL MUSCLE PRECURSOR ALPHA ACTIN 1 [CONTAINS ACTIN ALPHA SKELETAL MUSCLE INTERMEDIATE FORM]	GO:0003674;GO:0043167;GO:0048856	molecular_function;ion binding;anatomical structure development
ENSONIG00000000067	Rho guanine nucleotide exchange factor 37	arhgef37	9.04619	8.496	1.0666	0.0930232	3.21593	0.134161	0.714157	0.999804	1	protein_coding	ZDB-GENE-100514-3	100709651	I3ITZ1	GO:0035023;GO:0005089;GO:0005515	regulation of Rho protein signal transduction;Rho guanyl-nucleotide exchange factor activity;protein binding	biological_process;molecular_function	PTHR22834	RHO GUANINE NUCLEOTIDE EXCHANGE FACTOR	GO:0003674	molecular_function
ENSONIG00000000069			6.29812	6.23155	1.00735	0.010563	2.67648	0.0029952	0.956355	0.999804	1	protein_coding				GO:0005515;GO:0000166;GO:0005524	protein binding;nucleotide binding;ATP binding	molecular_function	PTHR24106_SF58	AMBIGUOUS	GO:0003674;GO:0043167	molecular_function;ion binding
ENSONIG00000000070	RNA polymerase II subunit B	polr2b	85.3622	90.7376	-1.06355	-0.0888941	6.45409	0.862304	0.353095	0.999804	1	protein_coding	ZDB-GENE-041008-1	100709382	I3ITZ5	GO:0032549;GO:0006351;GO:0003899;GO:0003677;GO:0016740;GO:0016779	ribonucleoside binding;transcription, DNA-templated;DNA-directed 5'-3' RNA polymerase activity;DNA binding;transferase activity;nucleotidyltransferase activity	molecular_function;biological_process	PTHR20856	DNA DIRECTED RNA POLYMERASE SUBUNIT RNA POLYMERASE RNA POLYMERASE	GO:0003674;GO:0003677;GO:0016779;GO:0009058;GO:0034641	molecular_function;DNA binding;nucleotidyltransferase activity;biosynthetic process;cellular nitrogen compound metabolic process	00230+2.7.7.6;00240+2.7.7.6
ENSONIG00000000071	ubiquitin protein ligase E3D	ube3d	10.8135	8.37244	1.28354	0.360132	3.27484	3.04329	0.0810715	0.999804	1	protein_coding	ZDB-GENE-091218-3	102081776	I3ITZ6				PTHR31531	E3 UBIQUITIN LIGASE E3D EC_2.3.2.26 HECT TYPE E3 UBIQUITIN TRANSFERASE E3D UBCH10 BINDING WITH A HECT DOMAIN UBIQUITIN CONJUGATING ENZYME E2C BINDING
ENSONIG00000000072	DOP1 leucine zipper like protein A	dop1a	36.8998	39.0853	-1.06021	-0.0843513	5.223	0.666534	0.414263	0.999804	1	protein_coding	ZDB-GENE-050309-65			GO:0006895;GO:0005829	Golgi to endosome transport;cytosol	biological_process;cellular_component	PTHR14042	DOPEY	GO:0006810;GO:0016192;GO:0005575;GO:0005829	transport;vesicle-mediated transport;cellular_component;cytosol
ENSONIG00000000073	WAS/WASL interacting protein family, member 2a	wipf2a	8.77918	8.73875	1.01326	0.019011	3.13726	0.0109323	0.916727	0.999804	1	protein_coding	ZDB-GENE-121219-6			GO:0003779	actin binding	molecular_function	PTHR23202_SF3	WAS/WASL INTERACTING FAMILY MEMBER 2 WASP INTERACTING RELATED WIP RELATED	GO:0003674;GO:0008092	molecular_function;cytoskeletal protein binding
ENSONIG00000000074	insulin like growth factor binding protein 7	igfbp7	16.8613	13.1435	1.27831	0.354241	3.87091	5.37986	0.0203705	0.999804	2	protein_coding	ZDB-GENE-040426-2423	100709924	I3ITZ9;I3IU00	GO:0001558;GO:0005520;GO:0005576;GO:0005515;GO:0042802;GO:0001569;GO:0002040	regulation of cell growth;insulin-like growth factor binding;extracellular region;protein binding;identical protein binding;branching involved in blood vessel morphogenesis;sprouting angiogenesis	biological_process;molecular_function;cellular_component	PTHR14186	INSULIN GROWTH FACTOR BINDING PRECURSOR BINDING IGFBP	GO:0003674;GO:0005575;GO:0005576;GO:0048646	molecular_function;cellular_component;extracellular region;anatomical structure formation involved in morphogenesis
ENSONIG00000000075	cryptochrome-1	CRY1 (1 of many)	199.967	202.127	-1.01082	-0.0155199	7.66703	0.0317672	0.85854	0.999804	1	protein_coding		100694525	I3IU01				PTHR11455_SF16	CRYPTOCHROME 1
ENSONIG00000000076	synaptotagmin 10	syt10	185.095	166.36	1.11278	0.154169	7.4745	1.73627	0.187612	0.999804	1	protein_coding	ZDB-GENE-041210-297	100707915	I3IU02	GO:0017158;GO:0016021;GO:0016020	regulation of calcium ion-dependent exocytosis;integral component of membrane;membrane	biological_process;cellular_component	PTHR10024_SF46	SYNAPTOTAGMIN 10 SYNAPTOTAGMIN X SYTX	GO:0005575	cellular_component
ENSONIG00000000078	lin-7 homolog A (C. elegans)	lin7a	30.2993	29.874	1.0147	0.0210549	4.89113	0.034132	0.853426	0.999804	1	protein_coding	ZDB-GENE-040426-1665			GO:0005515;GO:0016020;GO:0097016;GO:0006887;GO:0007269;GO:0015031;GO:0005886;GO:0016323;GO:0030054;GO:0097025;GO:0098793	protein binding;membrane;L27 domain binding;exocytosis;neurotransmitter secretion;protein transport;plasma membrane;basolateral plasma membrane;cell junction;MPP7-DLG1-LIN7 complex;presynapse	molecular_function;cellular_component;biological_process	PTHR14063	LIN 7 HOMOLOG LIN MAMMALIAN LIN SEVEN MALS VERTEBRATE LIN 7 HOMOLOG VELI	GO:0003674;GO:0005575;GO:0006810;GO:0016192;GO:0005886;GO:0032991	molecular_function;cellular_component;transport;vesicle-mediated transport;plasma membrane;protein-containing complex
ENSONIG00000000079	acyl-CoA synthetase short chain family member 3	acss3	4.94334	5.41734	-1.09567	-0.131816	2.41279	0.167598	0.682256	0.999804	1	protein_coding	ZDB-GENE-060503-816	100696642	I3IU05	GO:0003824	catalytic activity	molecular_function	PTHR24095_SF0	ACYL COA SYNTHETASE SHORT CHAIN FAMILY MEMBER MITOCHONDRIAL PRECURSOR EC_6.2.1.1	GO:0003674	molecular_function	00680+6.2.1.1;00720+6.2.1.1;00640+6.2.1.1;00010+6.2.1.1;00630+6.2.1.1;00620+6.2.1.1
ENSONIG00000000080	protein tyrosine phosphatase, receptor type, f polypeptide (PTPRF), interacting protein (liprin), alpha 2	ppfia2	18.2129	20.9328	-1.1503	-0.202005	4.18838	0.630377	0.427217	0.999804	2	protein_coding	ZDB-GENE-030131-7905			GO:0045202;GO:0005515	synapse;protein binding	cellular_component;molecular_function	PTHR12587	LIPRIN ALPHA TYROSINE PHOSPHATASE RECEPTOR TYPE F POLYPEPTIDE INTERACTING ALPHA PTPRF INTERACTING ALPHA	GO:0003674;GO:0005575	molecular_function;cellular_component
ENSONIG00000000081	cystine/glutamate transporter	si:ch73-352p4.8	48.9422	44.3264	1.10313	0.141606	5.57728	0.790746	0.373875	0.999804	1	protein_coding	ZDB-GENE-140106-36	100705084	I3IU08	GO:0055085;GO:0022857;GO:0016020;GO:0016021	transmembrane transport;transmembrane transporter activity;membrane;integral component of membrane	biological_process;molecular_function;cellular_component	PTHR11785_SF299	UNCHARACTERIZED	GO:0005575;GO:0022857;GO:0003674;GO:0006810;GO:0055085	cellular_component;transmembrane transporter activity;molecular_function;transport;transmembrane transport
ENSONIG00000000084	zmp:0000000711	zmp:0000000711	33.6307	30.2574	1.10927	0.149617	5.00558	1.49338	0.221692	0.999804	1	protein_coding	ZDB-GENE-130530-714		I3IU11				PTHR16517_SF26	TUBBY RELATED 3 TUBBY 3
ENSONIG00000000085			14.142	15.5918	-1.10248	-0.140753	3.91351	0.789276	0.374319	0.999804	1	protein_coding				GO:0008270;GO:0005515;GO:0046872	zinc ion binding;protein binding;metal ion binding	molecular_function	PTHR24103_SF253	NUCLEAR FACTOR 7 XNF7	GO:0003674;GO:0043167	molecular_function;ion binding
ENSONIG00000000086	pleiotrophin	ptn	304.972	315.452	-1.03439	-0.04878	8.26958	0.164202	0.685317	0.999804	1	protein_coding	ZDB-GENE-030624-1			GO:0008083;GO:0010469;GO:0007399	growth factor activity;regulation of signaling receptor activity;nervous system development	molecular_function;biological_process	PTHR13850	PRECURSOR	GO:0003674;GO:0008150;GO:0048856	molecular_function;biological_process;anatomical structure development
ENSONIG00000000087	myotrophin	mtpn	784.92	763.207	1.02848	0.040517	9.5857	0.223699	0.636236	0.999804	1	protein_coding	ZDB-GENE-040426-2166	100705880	I3IU14	GO:0005515	protein binding	molecular_function	PTHR24152_SF9	MYOTROPHIN	GO:0003674	molecular_function
ENSONIG00000000089	sema domain, immunoglobulin domain (Ig), short basic domain, secreted, (semaphorin) 3C	sema3c	22.7	23.6515	-1.03848	-0.0544671	4.52441	0.0986807	0.753419	0.999804	1	protein_coding	ZDB-GENE-050513-5			GO:0005515;GO:0048484	protein binding;enteric nervous system development	molecular_function;biological_process	PTHR11036_SF25	SEMAPHORIN 3C PRECURSOR	GO:0003674;GO:0048856	molecular_function;anatomical structure development
ENSONIG00000000090	CD36 molecule	cd36	25.8881	26.3767	-1.0209	-0.0298347	4.72893	0.0466475	0.829003	0.999804	2	protein_coding	ZDB-GENE-040718-55	100698241	I3IU17;I3IU18	GO:0007166;GO:0006955;GO:0016020;GO:0016021;GO:0007606;GO:0033552;GO:0034694;GO:0042742;GO:0005886	cell surface receptor signaling pathway;immune response;membrane;integral component of membrane;sensory perception of chemical stimulus;response to vitamin B3;response to prostaglandin;defense response to bacterium;plasma membrane	biological_process;cellular_component	PTHR11923	SENSORY NEURON MEMBRANE 1	GO:0005575;GO:0002376;GO:0007165;GO:0050877;GO:0006950;GO:0005886	cellular_component;immune system process;signal transduction;nervous system process;response to stress;plasma membrane
ENSONIG00000000091	guanine nucleotide-binding protein G(i) subunit alpha-1		276.987	278.07	-1.00391	-0.00562783	8.14907	0.00487814	0.944318	0.999804	1	protein_coding		100706147	I3IU19	GO:0007188;GO:0031683;GO:0019001;GO:0003924;GO:0007186;GO:0005525;GO:0007165;GO:0000166	adenylate cyclase-modulating G protein-coupled receptor signaling pathway;G-protein beta/gamma-subunit complex binding;guanyl nucleotide binding;GTPase activity;G protein-coupled receptor signaling pathway;GTP binding;signal transduction;nucleotide binding	biological_process;molecular_function	PTHR10218_SF173	GUANINE NUCLEOTIDE BINDING G I SUBUNIT ALPHA 1 ADENYLATE CYCLASE INHIBITING G ALPHA	GO:0007165;GO:0003674;GO:0043167;GO:0003924	signal transduction;molecular_function;ion binding;GTPase activity
ENSONIG00000000092	membrane associated guanylate kinase, WW and PDZ domain containing 2a	magi2a	11.9668	12.1983	-1.0224	-0.0319618	3.52206	0.0367375	0.848	0.999804	2	protein_coding	ZDB-GENE-050810-4		I3IU21;I3IU20	GO:0005923;GO:0032947;GO:0007165;GO:0005515;GO:0039021	bicellular tight junction;protein-containing complex scaffold activity;signal transduction;protein binding;pronephric glomerulus development	cellular_component;molecular_function;biological_process	PTHR10316_SF27	MEMBRANE ASSOCIATED GUANYLATE KINASE WW AND PDZ DOMAIN CONTAINING 2 ATROPHIN 1 INTERACTING 1 AIP 1 MEMBRANE ASSOCIATED GUANYLATE KINASE INVERTED 2 MAGI 2	GO:0003674;GO:0007165;GO:0005198;GO:0005575;GO:0048856	molecular_function;signal transduction;structural molecule activity;cellular_component;anatomical structure development	00230+2.7.4.8
ENSONIG00000000093			1.79352	2.2694	-1.27093	-0.345883	1.10727	1.27293	0.259217	0.999804	1	protein_coding				GO:0003676	nucleic acid binding	molecular_function	PTHR24377_SF205	ZINC FINGER	GO:0003674	molecular_function
ENSONIG00000000094	fatty acyl-CoA reductase 1	si:dkey-97m3.1	37.3065	40.6561	-1.08954	-0.123725	5.27459	1.31936	0.250707	0.999804	1	protein_coding	ZDB-GENE-060503-367	100698773	I3IU23	GO:0080019;GO:0016020;GO:0016021;GO:0016491;GO:0055114;GO:0102965;GO:0006629	fatty-acyl-CoA reductase (alcohol-forming) activity;membrane;integral component of membrane;oxidoreductase activity;oxidation-reduction process;alcohol-forming fatty acyl-CoA reductase activity;lipid metabolic process	molecular_function;cellular_component;biological_process	PTHR11011	FATTY ACYL COA REDUCTASE EC_1.2.1.84	GO:0005575;GO:0016491;GO:0006629	cellular_component;oxidoreductase activity;lipid metabolic process	00073+1.2.1.84
ENSONIG00000000095	endoplasmic reticulum-Golgi intermediate compartment protein 2	si:ch211-225b10.3	41.498	41.6422	-1.001	-0.00144389	5.40075	0.000150997	0.990196	0.999804	1	protein_coding	ZDB-GENE-130531-53	100699046	I3IU24	GO:0016020;GO:0016021	membrane;integral component of membrane	cellular_component	PTHR10984	ENDOPLASMIC RETICULUM GOLGI INTERMEDIATE COMPARTMENT	GO:0005575	cellular_component
ENSONIG00000000096	lysine demethylase 7A	KDM7A	9.07103	14.1274	-1.55816	-0.63984	3.86517	0.78352	0.376067	0.999804	1	protein_coding			I3IU25	GO:0005634;GO:0046872	nucleus;metal ion binding	cellular_component;molecular_function	PTHR23123_SF15	LYSINE SPECIFIC DEMETHYLASE 7A EC_1.14.11.- JMJC DOMAIN CONTAINING HISTONE DEMETHYLATION 1D LYSINE SPECIFIC DEMETHYLASE 7	GO:0005575;GO:0043226;GO:0005634;GO:0003674;GO:0043167	cellular_component;organelle;nucleus;molecular_function;ion binding
ENSONIG00000000097	lysine (K)-specific methyltransferase 2E	kmt2e	73.0803	72.9073	1.00312	0.00449933	6.19164	0.00129914	0.971248	0.999804	3	protein_coding	ZDB-GENE-030131-4120			GO:0005515;GO:0046872	protein binding;metal ion binding	molecular_function	PTHR16286_SF9	INACTIVE HISTONE LYSINE N METHYLTRANSFERASE 2E INACTIVE LYSINE N METHYLTRANSFERASE 2E MYELOID/LYMPHOID OR MIXED LINEAGE LEUKEMIA 5	GO:0003674;GO:0043167	molecular_function;ion binding
ENSONIG00000000098	LHFPL tetraspan subfamily member 3	lhfpl3	80.0112	77.2075	1.03691	0.052296	6.31831	0.248981	0.617794	0.999804	2	protein_coding	ZDB-GENE-040801-180	100699852	I3IU30;I3IU29	GO:0016020;GO:0016021	membrane;integral component of membrane	cellular_component	PTHR12489	LHFPL TETRASPAN SUBFAMILY MEMBER LIPOMA HMGIC FUSION PARTNER	GO:0005575	cellular_component
ENSONIG00000000099	origin recognition complex subunit 5	orc5	4.24226	3.664	1.15912	0.213027	2.08674	0.548976	0.458737	0.999804	1	protein_coding	ZDB-GENE-040426-2275	100706845	I3IU31	GO:0000808;GO:0006260;GO:0005634	origin recognition complex;DNA replication;nucleus	cellular_component;biological_process	PTHR12705	ORIGIN RECOGNITION COMPLEX SUBUNIT 5	GO:0005575;GO:0043226;GO:0005634;GO:0009058;GO:0006259;GO:0034641;GO:0032991	cellular_component;organelle;nucleus;biosynthetic process;DNA metabolic process;cellular nitrogen compound metabolic process;protein-containing complex
ENSONIG00000000100	cytochrome c oxidase assembly factor COX18	cox18	12.2802	11.7187	1.04845	0.0682602	3.65676	0.173161	0.677318	0.999804	1	protein_coding	ZDB-GENE-080204-88			GO:0032977;GO:0016021;GO:0016020;GO:0015031	membrane insertase activity;integral component of membrane;membrane;protein transport	molecular_function;cellular_component;biological_process	PTHR12428	CYTOCHROME C OXIDASE ASSEMBLY COX18 MITOCHONDRIAL PRECURSOR	GO:0005575;GO:0003674;GO:0008565;GO:0006810	cellular_component;molecular_function;protein transporter activity;transport
ENSONIG00000000101	selenoprotein T, 2	selenot2	59.6732	60.1002	-1.00541	-0.00777764	5.94566	0.00502354	0.943496	0.999804	1	protein_coding	ZDB-GENE-030411-4						PTHR13544_SF0	THIOREDOXIN REDUCTASE SELENOPROTEIN PRECURSOR EC_1.8.1.9
ENSONIG00000000102	aminopeptidase puromycin sensitive	npepps	114.875	115.94	-1.00931	-0.0133709	6.82686	0.0104173	0.918705	0.999804	1	protein_coding	ZDB-GENE-060524-3	100711411	I3IU34	GO:0008237;GO:0008270;GO:0006508;GO:0008233;GO:0016787;GO:0046872;GO:0004177	metallopeptidase activity;zinc ion binding;proteolysis;peptidase activity;hydrolase activity;metal ion binding;aminopeptidase activity	molecular_function;biological_process	PTHR11533_SF163	AMINOPEPTIDASE	GO:0003674;GO:0043167;GO:0008233	molecular_function;ion binding;peptidase activity
ENSONIG00000000103	sequestosome 1	sqstm1	74.1089	77.7618	-1.04956	-0.0697844	6.27443	0.501545	0.478822	0.999804	2	protein_coding	ZDB-GENE-040426-2204	100710448	I3IU35;I3IU36	GO:0008270;GO:0005515;GO:0046872;GO:0007409;GO:0007626;GO:0010506	zinc ion binding;protein binding;metal ion binding;axonogenesis;locomotory behavior;regulation of autophagy	molecular_function;biological_process	PTHR15090	SEQUESTOSOME 1 UBIQUITIN BINDING P62	GO:0003674;GO:0043167	molecular_function;ion binding
ENSONIG00000000104	synaptosomal-associated protein 91	snap91	196.69	199.106	-1.0121	-0.0173588	7.59298	0.0195908	0.888686	0.999804	1	protein_coding	ZDB-GENE-100422-6			GO:0005543;GO:0030136;GO:0030276;GO:0048268;GO:0005545	phospholipid binding;clathrin-coated vesicle;clathrin binding;clathrin coat assembly;1-phosphatidylinositol binding	molecular_function;cellular_component;biological_process	PTHR22951	CLATHRIN ASSEMBLY	GO:0003674;GO:0043167;GO:0008289;GO:0022607;GO:0065003;GO:0005575;GO:0043226;GO:0031410	molecular_function;ion binding;lipid binding;cellular component assembly;protein-containing complex assembly;cellular_component;organelle;cytoplasmic vesicle
ENSONIG00000000105	TBC1 domain family member 9B	tbc1d9	74.1268	77.4999	-1.04418	-0.062364	6.24559	0.359712	0.548666	0.999804	2	protein_coding	ZDB-GENE-060810-33	100710981	I3IU39;I3IU38	GO:0005509	calcium ion binding	molecular_function	PTHR22957_SF225	TBC1 DOMAIN FAMILY MEMBER 9B	GO:0003674;GO:0043167	molecular_function;ion binding
ENSONIG00000000106	malic enzyme 1, NADP(+)-dependent, cytosolic	me1	1.08921	1.68144	-1.55023	-0.632482	0.656354	2.18209	0.139625	0.999804	1	protein_coding	ZDB-GENE-061013-438			GO:0004470;GO:0051287;GO:0004471;GO:0055114;GO:0016491;GO:0046872	malic enzyme activity;NAD binding;malate dehydrogenase (decarboxylating) (NAD+) activity;oxidation-reduction process;oxidoreductase activity;metal ion binding	molecular_function;biological_process	PTHR23406	NADP DEPENDENT MALIC ENZYME NADP ME EC_1.1.1.40 MALIC ENZYME	GO:0003674;GO:0016491;GO:0043167	molecular_function;oxidoreductase activity;ion binding
ENSONIG00000000107	mitochondrial ribosomal protein L45	mrpl45	24.0043	25.6105	-1.06397	-0.0894566	4.64181	0.538712	0.462967	0.999804	1	protein_coding	ZDB-GENE-040426-1041		I3IU41				TF105825	39S RIBOSOMAL L45 MITOCHONDRIAL PRECURSOR L45MT MRP L45
ENSONIG00000000108	ring finger protein 130	rnf130	40.2291	38.9218	1.03394	0.0481517	5.31989	0.167737	0.682131	0.999804	2	protein_coding	ZDB-GENE-050522-525	100709113	I3IU42;I3IU43	GO:0016020;GO:0016021	membrane;integral component of membrane	cellular_component	PTHR22765_SF40	E3 UBIQUITIN LIGASE RNF130 PRECURSOR EC_2.3.2.27 GOLIATH HOMOLOG RING FINGER 130 RING TYPE E3 UBIQUITIN TRANSFERASE RNF130	GO:0005575	cellular_component
ENSONIG00000000109	si:ch211-156l18.8	si:ch211-156l18.8	8.05646	8.67838	-1.07956	-0.110444	3.08086	0.168513	0.681436	0.999804	1	protein_coding	ZDB-GENE-141215-43			GO:0007601;GO:0016021;GO:0007186;GO:0004930;GO:0016020	visual perception;integral component of membrane;G protein-coupled receptor signaling pathway;G protein-coupled receptor activity;membrane	biological_process;cellular_component;molecular_function	PTHR32546_SF7	PROBABLE G COUPLED RECEPTOR 179 PRECURSOR PROBABLE G COUPLED RECEPTOR 158 1 GPR158	GO:0003674;GO:0007165;GO:0005575;GO:0050877	molecular_function;signal transduction;cellular_component;nervous system process
ENSONIG00000000110	F2R like thrombin or trypsin receptor 3	si:ch211-132p1.2	8.68793	8.26794	1.04916	0.0692298	3.0784	0.11161	0.738318	0.999804	1	protein_coding	ZDB-GENE-130530-869		I3IU45	GO:0070493;GO:0007596;GO:0015057;GO:0016021;GO:0007186;GO:0004930;GO:0016020;GO:0007165	thrombin-activated receptor signaling pathway;blood coagulation;thrombin-activated receptor activity;integral component of membrane;G protein-coupled receptor signaling pathway;G protein-coupled receptor activity;membrane;signal transduction	biological_process;molecular_function;cellular_component	PTHR24232	RECEPTOR	GO:0003674;GO:0007165;GO:0005575	molecular_function;signal transduction;cellular_component
ENSONIG00000000111	ArfGAP with RhoGAP domain, ankyrin repeat and PH domain 3	arap3	33.0759	34.3437	-1.0359	-0.0508791	5.10268	0.191914	0.661329	0.999804	2	protein_coding	ZDB-GENE-091019-1			GO:0043547;GO:0005547;GO:0005096;GO:0007165;GO:0005515;GO:0001946	positive regulation of GTPase activity;phosphatidylinositol-3,4,5-trisphosphate binding;GTPase activator activity;signal transduction;protein binding;lymphangiogenesis	biological_process;molecular_function	PTHR23180_SF9	ARF GAP WITH RHO GAP DOMAIN ANK REPEAT AND PH DOMAIN CONTAINING 3 CENTAURIN DELTA 3 CNT D3	GO:0003674;GO:0007165;GO:0030234;GO:0043167;GO:0008289;GO:0048646	molecular_function;signal transduction;enzyme regulator activity;ion binding;lipid binding;anatomical structure formation involved in morphogenesis
ENSONIG00000000112	PR/SET domain 13	prdm13	3.70887	3.69596	1.00133	0.00192187	1.88343	4.89398e-05	0.994418	0.999804	1	protein_coding	ZDB-GENE-080616-1	100700127	I3IU48	GO:0003676;GO:0005515	nucleic acid binding;protein binding	molecular_function	PTHR23228_SF119	PR DOMAIN ZINC FINGER 13 EC_2.1.1.- PR DOMAIN CONTAINING 13	GO:0003674	molecular_function
ENSONIG00000000114	suppressor of cytokine signaling 7	socs7	70.1964	66.6447	1.05356	0.0752781	6.04926	0.134671	0.713637	0.999804	1	protein_coding	ZDB-GENE-080204-125			GO:0035556;GO:0016567	intracellular signal transduction;protein ubiquitination	biological_process	PTHR10385_SF30	SUPPRESSOR OF CYTOKINE SIGNALING 7 SOCS 7	GO:0007165;GO:0006464	signal transduction;cellular protein modification process
ENSONIG00000000115	thiosulfate sulfurtransferase like domain containing 3		6.43378	8.01948	-1.23838	-0.30845	2.86719	2.25034	0.133585	0.999804	1	protein_coding		100694266	I3IU52				PTHR13253_SF12	UNCHARACTERIZED
ENSONIG00000000116	ubiquitin specific peptidase 45	usp45	23.0067	21.1773	1.08929	0.123392	4.47081	1.05258	0.304913	0.999804	2	protein_coding	ZDB-GENE-100211-2			GO:0008270;GO:0006511;GO:0016579;GO:0036459;GO:0008233;GO:0008234;GO:0016787;GO:0006508;GO:0046872	zinc ion binding;ubiquitin-dependent protein catabolic process;protein deubiquitination;thiol-dependent ubiquitinyl hydrolase activity;peptidase activity;cysteine-type peptidase activity;hydrolase activity;proteolysis;metal ion binding	molecular_function;biological_process	PTHR24006_SF346	UBIQUITIN CARBOXYL TERMINAL HYDROLASE 45 EC_3.4.19.12 DEUBIQUITINATING ENZYME 45 UBIQUITIN THIOESTERASE 45 UBIQUITIN SPECIFIC PROCESSING PROTEASE 45	GO:0006464;GO:0009056;GO:0003674;GO:0043167;GO:0008233	cellular protein modification process;catabolic process;molecular_function;ion binding;peptidase activity
ENSONIG00000000117	Sp2 transcription factor	sp2	14.843	14.3917	1.02964	0.0421429	3.86375	0.0901648	0.763968	0.999804	1	protein_coding	ZDB-GENE-080410-1	100702386	I3IU55	GO:0035264;GO:0003676	multicellular organism growth;nucleic acid binding	biological_process;molecular_function	PTHR23235_SF1	TRANSCRIPTION FACTOR SP2	GO:0003674;GO:0040007	molecular_function;growth
ENSONIG00000000118	StAR-related lipid transfer (START) domain containing 15	stard15	5.31996	5.51045	-1.02797	-0.0397981	2.48768	0.0277597	0.867675	0.999804	1	protein_coding	ZDB-GENE-070424-267			GO:0008289	lipid binding	molecular_function	PTHR19308_SF2	UNCHARACTERIZED	GO:0003674;GO:0008289	molecular_function;lipid binding
ENSONIG00000000119	ATP-binding cassette, sub-family C (CFTR/MRP), member 10	abcc10	23.6524	25.5557	-1.07504	-0.104395	4.67038	0.516442	0.472363	0.999804	1	protein_coding	ZDB-GENE-050517-24			GO:0042626;GO:0016887;GO:0055085;GO:0016021;GO:0005524;GO:0016020;GO:0000166	ATPase activity, coupled to transmembrane movement of substances;ATPase activity;transmembrane transport;integral component of membrane;ATP binding;membrane;nucleotide binding	molecular_function;biological_process;cellular_component	PTHR24223_SF179	AMBIGUOUS	GO:0003674;GO:0043167;GO:0005575;GO:0006810;GO:0055085;GO:0016887;GO:0022857	molecular_function;ion binding;cellular_component;transport;transmembrane transport;ATPase activity;transmembrane transporter activity
ENSONIG00000000120	PNN interacting serine and arginine rich protein	pnisr	143.3	155.16	-1.08309	-0.115148	7.13249	1.46573	0.22602	0.999804	2	protein_coding	ZDB-GENE-030131-362	100694533	I3IU59;I3IU58				PTHR31518	ARGININE/SERINE RICH PNISR SERINE/ARGININE RICH SPLICING REGULATORY 130 SRRP130 SPLICING FACTOR ARGININE/SERINE RICH 130 SPLICING FACTOR ARGININE/SERINE RICH 18
ENSONIG00000000122			4.5401	4.97528	-1.09461	-0.130414	2.32064	0.429446	0.512261	0.999804	1	protein_coding				GO:0003676	nucleic acid binding	molecular_function	PTHR24377_SF205	ZINC FINGER	GO:0003674	molecular_function
ENSONIG00000000124	coenzyme Q3 methyltransferase	coq3	17.8134	18.056	-1.01583	-0.022659	4.16613	0.0256848	0.872673	0.999804	1	protein_coding	ZDB-GENE-040718-364		I3IU63	GO:0008168;GO:0006744;GO:0008425;GO:0016020;GO:0016740;GO:0004395;GO:0008689;GO:0010420;GO:0061542;GO:1990886;GO:0032259;GO:0005739;GO:0005743;GO:0031314	methyltransferase activity;ubiquinone biosynthetic process;2-polyprenyl-6-methoxy-1,4-benzoquinone methyltransferase activity;membrane;transferase activity;hexaprenyldihydroxybenzoate methyltransferase activity;3-demethylubiquinone-9 3-O-methyltransferase activity;polyprenyldihydroxybenzoate methyltransferase activity;3-demethylubiquinone-n 3-O-methyltransferase activity;3,4-dihydroxy-5-polypreny…	molecular_function;biological_process;cellular_component	PTHR23134	UBIQUINONE BIOSYNTHESIS O METHYLTRANSFERASE MITOCHONDRIAL 3 DEMETHYLUBIQUINOL 3 O METHYLTRANSFERASE EC_2.1.1.64 POLYPRENYLDIHYDROXYBENZOATE METHYLTRANSFERASE EC_2.1.1.- 114	GO:0008168;GO:0009058;GO:0044281;GO:0051186;GO:0005575;GO:0043226;GO:0005739	methyltransferase activity;biosynthetic process;small molecule metabolic process;cofactor metabolic process;cellular_component;organelle;mitochondrion	00130+2.1.1.222+2.1.1.64
ENSONIG00000000125	failed axon connections homolog	faxcb	35.8696	35.6556	1.00592	0.00851202	5.13755	0.00566978	0.939978	0.999804	2	protein_coding	ZDB-GENE-100922-19	100700937	I3IU64;I3IU65				PTHR12289	METAXIN MITOCHONDRIAL OUTER MEMBRANE IMPORT COMPLEX
ENSONIG00000000127	F-box and leucine rich repeat protein 4	fbxl4	37.6114	32.8829	1.1452	0.195604	5.22778	1.6958	0.192839	0.999804	1	protein_coding	ZDB-GENE-041114-187	100695061	I3IU68	GO:0005515	protein binding	molecular_function	PTHR23125_SF244	F BOX/LRR REPEAT 4 F BOX AND LEUCINE RICH REPEAT 4	GO:0003674	molecular_function
ENSONIG00000000128	MMS22 like, DNA repair protein	mms22l	2.61635	1.36366	1.89199	0.919904	1.24302	7.27545	0.00699035	0.999804	1	protein_coding	ZDB-GENE-030131-3869	100701487	I3IU69				TF353832	MMS22 METHYL METHANESULFONATE SENSITIVITY 22
ENSONIG00000000129			12.4865	10.5543	1.1837	0.243304	3.48752	1.13471	0.286774	0.999804	1	protein_coding				GO:0016791;GO:0016311;GO:0006470;GO:0004725;GO:0016020;GO:0016021;GO:0016787;GO:0004721;GO:0035335	phosphatase activity;dephosphorylation;protein dephosphorylation;protein tyrosine phosphatase activity;membrane;integral component of membrane;hydrolase activity;phosphoprotein phosphatase activity;peptidyl-tyrosine dephosphorylation	molecular_function;biological_process;cellular_component	PTHR19134_SF206	RECEPTOR TYPE TYROSINE PHOSPHATASE MU PRECURSOR TYROSINE PHOSPHATASE MU R PTP MU EC_3.1.3.48	GO:0016791;GO:0006464;GO:0005575	phosphatase activity;cellular protein modification process;cellular_component
ENSONIG00000000130	kelch like family member 32	klhl32	13.1866	13.5634	-1.03306	-0.0469177	3.78628	0.0814114	0.775394	0.999804	2	protein_coding	ZDB-GENE-070209-47	100695861	I3IU71;I3IU72	GO:0005515	protein binding	molecular_function	PTHR24412_SF65	KELCH 32 BTB AND KELCH DOMAIN CONTAINING 5	GO:0003674	molecular_function
ENSONIG00000000131			1.02453	1.06574	-1.02475	-0.035265	0.177517	0.00436093	0.947348	0.999804	2	protein_coding							PTHR13771_SF9	INTERCELLULAR ADHESION MOLECULE 3 PRECURSOR ICAM 3 CD50 ANTIGEN
ENSONIG00000000132			0.765115	0.663778	1.14964	0.201186	-0.160806	0.01631	0.898378	0.999804	1	protein_coding							PTHR31025	UNCHARACTERIZED
ENSONIG00000000133			11.9206	8.19984	1.4548	0.54082	3.42495	3.18296	0.0744097	0.999804	1	protein_coding							PTHR13771_SF9	INTERCELLULAR ADHESION MOLECULE 3 PRECURSOR ICAM 3 CD50 ANTIGEN
ENSONIG00000000134	general transcription factor IIIC subunit 1	GTF3C1	28.8038	28.5566	1.00855	0.0122777	4.81482	0.00605376	0.937982	0.999804	2	protein_coding		100695611	I3IU77;I3IU78				PTHR15180	GENERAL TRANSCRIPTION FACTOR 3C POLYPEPTIDE 1 TF3C ALPHA TFIIIC BOX B BINDING SUBUNIT TRANSCRIPTION FACTOR IIIC 220 KDA SUBUNIT TFIIIC 220 KDA SUBUNIT TFIIIC220 TRANSCRIPTION FACTOR IIIC SUBUNIT ALPHA
ENSONIG00000000135	frizzled class receptor 6	fzd6	12.7549	12.6199	1.00826	0.0118698	3.71013	0.00282243	0.957631	0.999804	1	protein_coding	ZDB-GENE-040426-1451			GO:0016055;GO:0042813;GO:0004888;GO:0007166;GO:0016021;GO:0016020;GO:0005515;GO:0001525;GO:0007275;GO:0048701	Wnt signaling pathway;Wnt-activated receptor activity;transmembrane signaling receptor activity;cell surface receptor signaling pathway;integral component of membrane;membrane;protein binding;angiogenesis;multicellular organism development;embryonic cranial skeleton morphogenesis	biological_process;molecular_function;cellular_component	PTHR11309_SF75	FRIZZLED 6 FZ 6	GO:0003674;GO:0005575;GO:0007165;GO:0048646;GO:0048856;GO:0009790	molecular_function;cellular_component;signal transduction;anatomical structure formation involved in morphogenesis;anatomical structure development;embryo development
ENSONIG00000000136	mitochondrial ribosomal protein L4	mrpl4	4.29933	4.95318	-1.13627	-0.184308	2.26074	0.769555	0.380355	0.999804	1	protein_coding	ZDB-GENE-050522-388	100712222	I3IU80	GO:0005840;GO:0006412;GO:0003735	ribosome;translation;structural constituent of ribosome	cellular_component;biological_process;molecular_function	PTHR10746	39S RIBOSOMAL L4 MITOCHONDRIAL L4MT MRP L4	GO:0003674;GO:0005198;GO:0003735;GO:0009058;GO:0034641;GO:0006412;GO:0032991;GO:0005575;GO:0043226;GO:0005840	molecular_function;structural molecule activity;structural constituent of ribosome;biosynthetic process;cellular nitrogen compound metabolic process;translation;protein-containing complex;cellular_component;organelle;ribosome
ENSONIG00000000137	collagen triple helix repeat containing 1b	cthrc1b	7.27901	6.95331	1.04194	0.0592757	2.88044	0.0646962	0.799222	0.999804	1	protein_coding	ZDB-GENE-050420-46		I3IU81				PTHR24637_SF208	COLLAGEN TRIPLE HELIX REPEAT CONTAINING 1 PRECURSOR
ENSONIG00000000138	HYLS1, centriolar and ciliogenesis associated	si:dkey-23f9.4	4.79484	5.35024	-1.11733	-0.160057	2.37389	0.553771	0.456781	0.999804	2	protein_coding	ZDB-GENE-141222-88	100702926	I3IU82;I3IU83				TF336132	HYDROLETHALUS SYNDROME 1
ENSONIG00000000139	solute carrier family 25 (mitochondrial folate carrier), member 32b	slc25a32b	14.3229	13.825	1.034	0.0482353	3.83922	0.0986817	0.753417	0.999804	1	protein_coding	ZDB-GENE-050306-39		I3IU84	GO:0031966;GO:0006839;GO:0022857;GO:0016020;GO:0016021;GO:0055085	mitochondrial membrane;mitochondrial transport;transmembrane transporter activity;membrane;integral component of membrane;transmembrane transport	cellular_component;biological_process;molecular_function	PTHR24089_SF62	MITOCHONDRIAL FOLATE TRANSPORTER/CARRIER SOLUTE CARRIER FAMILY 25 MEMBER 32	GO:0022857;GO:0003674;GO:0006810;GO:0005575;GO:0055085	transmembrane transporter activity;molecular_function;transport;cellular_component;transmembrane transport
ENSONIG00000000140	semaphorin 6D	sema6dl	82.384	74.6832	1.10175	0.139803	6.34037	2.44587	0.117834	0.999804	1	protein_coding	ZDB-GENE-050417-171	100711158	I3IU85	GO:0005515;GO:0016020;GO:0016021	protein binding;membrane;integral component of membrane	molecular_function;cellular_component	PTHR11036_SF65	SEMAPHORIN 6D PRECURSOR	GO:0003674;GO:0005575	molecular_function;cellular_component
ENSONIG00000000141	collagen, type IX, alpha 1a	col9a1a	10.8048	12.5616	-1.16632	-0.221963	3.46546	0.465382	0.495119	0.999804	1	protein_coding	ZDB-GENE-080721-25						PTHR24023_SF454	COLLAGEN ALPHA 1 IX CHAIN
ENSONIG00000000142	DDB1 and CUL4 associated factor 13	dcaf13	26.3198	25.9311	1.01396	0.0199975	4.74548	0.0128779	0.909649	0.999804	1	protein_coding	ZDB-GENE-040426-703	100696386	I3IU87	GO:0005515	protein binding	molecular_function	PTHR22851	DDB1 AND CUL4 ASSOCIATED FACTOR 13 WD REPEAT AND SOF DOMAIN CONTAINING 1	GO:0003674	molecular_function
ENSONIG00000000143	regulating synaptic membrane exocytosis 2	RIMS2	119.054	118.449	1.00593	0.00852407	6.86926	0.0045707	0.946098	0.999804	2	protein_coding			I3IU88;I3IU89	GO:0048786;GO:0048791;GO:0017157;GO:0006887;GO:0017137;GO:0006886;GO:0016020;GO:0005515;GO:0046872	presynaptic active zone;calcium ion-regulated exocytosis of neurotransmitter;regulation of exocytosis;exocytosis;Rab GTPase binding;intracellular protein transport;membrane;protein binding;metal ion binding	cellular_component;biological_process;molecular_function	PTHR12157_SF15	REGULATING SYNAPTIC MEMBRANE EXOCYTOSIS 2 RAB 3 INTERACTING MOLECULE 2 RIM 2 RAB 3 INTERACTING	GO:0003674;GO:0005575;GO:0006810;GO:0016192;GO:0043167	molecular_function;cellular_component;transport;vesicle-mediated transport;ion binding
ENSONIG00000000144	axin-1		78.746	80.2619	-1.02045	-0.0292042	6.30514	0.0855712	0.769885	0.999804	2	protein_coding		100695880	I3IU90;I3IU91	GO:0030877;GO:0030159;GO:0007165;GO:0016055	beta-catenin destruction complex;receptor signaling complex scaffold activity;signal transduction;Wnt signaling pathway	cellular_component;molecular_function;biological_process	PTHR10845_SF11	AXIN 1 AXIS INHIBITION 1	GO:0007165;GO:0003674;GO:0005198;GO:0032991;GO:0005575	signal transduction;molecular_function;structural molecule activity;protein-containing complex;cellular_component
ENSONIG00000000145	Dmx like 2	dmxl2	478.355	472.495	1.01243	0.017828	8.91641	0.0214355	0.883599	0.999804	2	protein_coding	ZDB-GENE-031007-6	100711428		GO:0005515;GO:0001755;GO:0030100;GO:0090263;GO:1901546	protein binding;neural crest cell migration;regulation of endocytosis;positive regulation of canonical Wnt signaling pathway;regulation of synaptic vesicle lumen acidification	molecular_function;biological_process	PTHR13950	DMX	GO:0003674;GO:0048870;GO:0040011;GO:0008150	molecular_function;cell motility;locomotion;biological_process
ENSONIG00000000146	THUMP domain containing 1	thumpd1	13.814	12.6844	1.09193	0.126875	3.74079	0.701722	0.402206	0.999804	1	protein_coding	ZDB-GENE-040426-1805			GO:0006400;GO:0003723	tRNA modification;RNA binding	biological_process;molecular_function	PTHR13452	THUMP DOMAIN CONTAINING 1	GO:0003674;GO:0003723;GO:0034641;GO:0006399	molecular_function;RNA binding;cellular nitrogen compound metabolic process;tRNA metabolic process
ENSONIG00000000148	RNA exonuclease 5	REXO5	2.07499	2.52865	-1.2173	-0.283681	1.47767	0.432755	0.51064	0.999804	2	protein_coding			I3IU98;I3IU97	GO:0003676;GO:0003723	nucleic acid binding;RNA binding	molecular_function	PTHR12801_SF61	RNA EXONUCLEASE 5 EC_3.1.-.- EXONUCLEASE NEF SP	GO:0003674;GO:0003723	molecular_function;RNA binding
ENSONIG00000000151	poly(A)-specific ribonuclease	parn	66.4799	64.6273	1.02948	0.0419155	6.04843	0.134812	0.713494	0.999804	2	protein_coding	ZDB-GENE-040426-880	100696935	I3IUA3;I3IUA4	GO:0006402;GO:0004535;GO:0005737;GO:0003723;GO:0046872;GO:0003676;GO:0005634;GO:0090503	mRNA catabolic process;poly(A)-specific ribonuclease activity;cytoplasm;RNA binding;metal ion binding;nucleic acid binding;nucleus;RNA phosphodiester bond hydrolysis, exonucleolytic	biological_process;molecular_function;cellular_component	PTHR15092	POLY A SPECIFIC RIBONUCLEASE EC_3.1.13.4 SPECIFIC RIBONUCLEASE	GO:0005575;GO:0043226;GO:0005634;GO:0003674;GO:0043167;GO:0003723;GO:0005737;GO:0004518;GO:0009056;GO:0034641;GO:0034655	cellular_component;organelle;nucleus;molecular_function;ion binding;RNA binding;cytoplasm;nuclease activity;catabolic process;cellular nitrogen compound metabolic process;nucleobase-containing compound catabolic process
ENSONIG00000000152	zinc finger protein, FOG family member 2a	zfpm2a	66.2749	63.2824	1.04731	0.0666926	6.01964	0.354367	0.551652	0.999804	1	protein_coding	ZDB-GENE-060130-4			GO:0006357;GO:0001085;GO:0003676	regulation of transcription by RNA polymerase II;RNA polymerase II transcription factor binding;nucleic acid binding	biological_process;molecular_function	PTHR12958	ZINC FINGER ZFPM1 FRIEND OF GATA 1 FOG 1 FRIEND OF GATA 1 ZINC FINGER MULTITYPE 1	GO:0003674;GO:0008134	molecular_function;transcription factor binding
ENSONIG00000000154	oxidation resistance 1b	oxr1b	105.098	97.8765	1.07431	0.103415	6.6929	0.841897	0.358855	0.999804	1	protein_coding	ZDB-GENE-030131-2438		I3IUA8				PTHR23354_SF69	OXIDATION RESISTANCE 1
ENSONIG00000000156	protein tyrosine phosphatase type IVA, member 1	ptp4a1	198.315	207.011	-1.0435	-0.0614258	7.645	0.409526	0.52221	0.999804	1	protein_coding	ZDB-GENE-041121-11			GO:0016791;GO:0016311;GO:0006470;GO:0004725;GO:0035335	phosphatase activity;dephosphorylation;protein dephosphorylation;protein tyrosine phosphatase activity;peptidyl-tyrosine dephosphorylation	molecular_function;biological_process	PTHR23339_SF55	TYROSINE PHOSPHATASE TYPE IVA 1 PRECURSOR EC_3.1.3.48 TYROSINE PHOSPHATASE 4A1 TYROSINE PHOSPHATASE OF REGENERATING LIVER 1 PRL 1	GO:0016791;GO:0006464	phosphatase activity;cellular protein modification process
ENSONIG00000000160	protein ELFN1		67.903	68.8483	-1.01349	-0.0193329	6.06376	0.0245477	0.875499	0.999804	2	protein_coding		100697202	I3IUB5;I3IUB6	GO:0005515;GO:0016020;GO:0016021	protein binding;membrane;integral component of membrane	molecular_function;cellular_component	PTHR24367_SF34	ELFN1 PRECURSOR EXTRACELLULAR LEUCINE RICH REPEAT AND FIBRONECTIN TYPE III DOMAIN CONTAINING 1 PHOSPHATASE 1 REGULATORY SUBUNIT 28	GO:0003674;GO:0005575	molecular_function;cellular_component
ENSONIG00000000161	squalene epoxidase a	sqlea	7.89379	10.0633	-1.27716	-0.352935	3.17227	1.28917	0.256201	0.999804	1	protein_coding	ZDB-GENE-071004-98			GO:0016126;GO:0050660;GO:0004506;GO:0016021;GO:0055114;GO:0016020	sterol biosynthetic process;flavin adenine dinucleotide binding;squalene monooxygenase activity;integral component of membrane;oxidation-reduction process;membrane	biological_process;molecular_function;cellular_component	PTHR10835	SQUALENE MONOOXYGENASE EC_1.14.14.17 SQUALENE EPOXIDASE SE	GO:0005575;GO:0003674;GO:0043167;GO:0009058;GO:0006629	cellular_component;molecular_function;ion binding;biosynthetic process;lipid metabolic process	00909+1.14.14.17;00100+1.14.14.17
ENSONIG00000000162	mitotic arrest deficient 1 like 1	mad1l1	19.0687	21.3263	-1.12143	-0.16534	4.35732	1.45518	0.227699	0.999804	1	protein_coding	ZDB-GENE-040426-1081			GO:0007094	mitotic spindle assembly checkpoint	biological_process	PTHR23168	MITOTIC SPINDLE ASSEMBLY CHECKPOINT MAD1 MITOTIC ARREST DEFICIENT 1 1 MAD1 1
ENSONIG00000000163	ring finger protein 144B	rnf144b	5.68579	6.42122	-1.13523	-0.182979	2.59532	0.667397	0.413961	0.999804	1	protein_coding	ZDB-GENE-040426-1292			GO:0016567;GO:0004842;GO:0016020;GO:0016021;GO:0016740;GO:0046872	protein ubiquitination;ubiquitin-protein transferase activity;membrane;integral component of membrane;transferase activity;metal ion binding	biological_process;molecular_function;cellular_component	PTHR11685_SF104	E3 UBIQUITIN LIGASE RNF144B EC_2.3.2.31 IBR DOMAIN CONTAINING 2 RING FINGER 144B	GO:0006464;GO:0005575;GO:0003674;GO:0043167	cellular protein modification process;cellular_component;molecular_function;ion binding
ENSONIG00000000164	IQ motif containing G		12.5337	12.5135	1.00329	0.00473163	3.72322	0.000241779	0.987594	0.999804	1	protein_coding		100704186	I3IUC0	GO:0005515	protein binding	molecular_function			GO:0003674	molecular_function
ENSONIG00000000165	spire-type actin nucleation factor 1b	spire1b	151.583	145.686	1.04069	0.0575405	7.23587	0.0467054	0.828899	0.999804	1	protein_coding	ZDB-GENE-120608-4		I3IUC1	GO:0045010;GO:0016192;GO:0003779	actin nucleation;vesicle-mediated transport;actin binding	biological_process;molecular_function	PTHR21345	SPIRE	GO:0003674;GO:0008092;GO:0006810;GO:0016192	molecular_function;cytoskeletal protein binding;transport;vesicle-mediated transport
ENSONIG00000000166	TNF alpha induced protein 8 like 3	tnfaip8l3	147.69	138.313	1.06747	0.0941961	7.18146	0.93241	0.334237	0.999804	1	protein_coding	ZDB-GENE-040426-1313	100708484	I3IUC2	GO:0042981	regulation of apoptotic process	biological_process	PTHR12757	TUMOR NECROSIS FACTOR ALPHA INDUCED 8 2 TIPE2 TNF ALPHA INDUCED 8 2 TNFAIP8 2
ENSONIG00000000167	secretogranin III	scg3	324.572	322.223	1.00735	0.0105663	8.34294	0.0159244	0.89958	0.999804	2	protein_coding	ZDB-GENE-040426-1725						PTHR17388	SECRETOGRANIN 3 PRECURSOR SECRETOGRANIN III SGIII
ENSONIG00000000168			6.09799	5.17375	1.18216	0.241424	2.7091	1.24486	0.264537	0.999804	1	protein_coding				GO:0016021;GO:0007186;GO:0004930;GO:0016020;GO:0007165	integral component of membrane;G protein-coupled receptor signaling pathway;G protein-coupled receptor activity;membrane;signal transduction	cellular_component;biological_process;molecular_function	PTHR24241	RECEPTOR	GO:0003674;GO:0007165;GO:0005575	molecular_function;signal transduction;cellular_component
ENSONIG00000000169	beta-1,3-N-acetylglucosaminyltransferase lunatic fringe		10.0909	9.65951	1.04133	0.0584326	3.34602	0.0715004	0.789165	0.999804	1	protein_coding		100697735	I3IUC6	GO:0030173;GO:0007389;GO:0033829;GO:0016757;GO:0016020;GO:0016740;GO:0005794;GO:0000139;GO:0046872	integral component of Golgi membrane;pattern specification process;O-fucosylpeptide 3-beta-N-acetylglucosaminyltransferase activity;transferase activity, transferring glycosyl groups;membrane;transferase activity;Golgi apparatus;Golgi membrane;metal ion binding	cellular_component;biological_process;molecular_function	PTHR10811_SF7	BETA 1 3 N ACETYLGLUCOSAMINYLTRANSFERASE LUNATIC FRINGE EC_2.4.1.222 O FUCOSYLPEPTIDE 3 BETA N ACETYLGLUCOSAMINYLTRANSFERASE	GO:0005575;GO:0016757;GO:0043226;GO:0005794;GO:0003674;GO:0043167	cellular_component;transferase activity, transferring glycosyl groups;organelle;Golgi apparatus;molecular_function;ion binding	00514+2.4.1.222
ENSONIG00000000171	protein tweety homolog 3	ttyh3b	777.62	764.433	1.0173	0.0247408	9.56866	0.038028	0.845387	0.999804	2	protein_coding	ZDB-GENE-051120-105	100697998	I3IUD0;I3IUC9	GO:0016020;GO:0016021;GO:0006811;GO:0005886;GO:0005254;GO:0006821;GO:1902476;GO:0034707	membrane;integral component of membrane;ion transport;plasma membrane;chloride channel activity;chloride transport;chloride transmembrane transport;chloride channel complex	cellular_component;biological_process;molecular_function	PTHR12424	TWEETY HOMOLOG	GO:0005575;GO:0006810;GO:0005886;GO:0022857;GO:0003674;GO:0055085;GO:0032991	cellular_component;transport;plasma membrane;transmembrane transporter activity;molecular_function;transmembrane transport;protein-containing complex
ENSONIG00000000172	LysM domain containing 2	lysmd2	22.569	22.155	1.02251	0.0321109	4.52224	0.068326	0.79379	0.999804	2	protein_coding	ZDB-GENE-040801-250	100709021	I3IUD2;I3IUD1				PTHR20932_SF4	LYSM AND PEPTIDOGLYCAN BINDING DOMAIN CONTAINING 2
ENSONIG00000000174	tropomodulin 3	tmod2	397.567	391.858	1.01481	0.0212043	8.65933	0.0604402	0.805801	0.999804	1	protein_coding	ZDB-GENE-040912-185	100709294	I3IUD4	GO:0048821;GO:0030036;GO:0051694;GO:0005523	erythrocyte development;actin cytoskeleton organization;pointed-end actin filament capping;tropomyosin binding	biological_process;molecular_function	PTHR10901_SF15	TROPOMODULIN 3 UBIQUITOUS TROPOMODULIN U TMOD	GO:0003674;GO:0008092;GO:0007010;GO:0048856	molecular_function;cytoskeletal protein binding;cytoskeleton organization;anatomical structure development
ENSONIG00000000175	IQ motif containing E		39.8351	43.9193	-1.10156	-0.139551	5.32379	1.56915	0.210331	0.999804	2	protein_coding		102077507	I3IUD5;I3IUD6	GO:0005515	protein binding	molecular_function	TF630019	IQ DOMAIN CONTAINING E	GO:0003674	molecular_function
ENSONIG00000000176	LEO1 homolog, Paf1/RNA polymerase II complex component	leo1	35.7053	35.8192	-1.00338	-0.00486273	5.1977	0.00201159	0.964226	0.999804	3	protein_coding	ZDB-GENE-040426-2435	100711969	I3IUD8;I3IUD7;I3IUD9	GO:0016593;GO:0016570;GO:0006368;GO:0007507;GO:0014032;GO:0021529;GO:0021782;GO:0030318;GO:0048701;GO:0050936;GO:0005634	Cdc73/Paf1 complex;histone modification;transcription elongation from RNA polymerase II promoter;heart development;neural crest cell development;spinal cord oligodendrocyte cell differentiation;glial cell development;melanocyte differentiation;embryonic cranial skeleton morphogenesis;xanthophore differentiation;nucleus	cellular_component;biological_process	PTHR23146	RNA POLYMERASE ASSOCIATED LEO1	GO:0009058;GO:0034641;GO:0006464;GO:0032991;GO:0005575;GO:0048856;GO:0030154;GO:0009790;GO:0043226;GO:0005634	biosynthetic process;cellular nitrogen compound metabolic process;cellular protein modification process;protein-containing complex;cellular_component;anatomical structure development;cell differentiation;embryo development;organelle;nucleus
ENSONIG00000000177	fascin	fscn1b	826.54	785.461	1.05234	0.0736041	9.63713	0.337888	0.561051	0.999804	1	protein_coding	ZDB-GENE-120507-1	100693740	I3IUE0	GO:0016477;GO:0007015;GO:0051015;GO:0030674;GO:0030036;GO:0005737;GO:0003779;GO:0005856	cell migration;actin filament organization;actin filament binding;protein binding, bridging;actin cytoskeleton organization;cytoplasm;actin binding;cytoskeleton	biological_process;molecular_function;cellular_component	PTHR10551	FASCIN	GO:0007010;GO:0003674;GO:0030674;GO:0008092;GO:0048870;GO:0040011;GO:0005575;GO:0005737;GO:0043226;GO:0005856	cytoskeleton organization;molecular_function;protein binding, bridging;cytoskeletal protein binding;cell motility;locomotion;cellular_component;cytoplasm;organelle;cytoskeleton
ENSONIG00000000178	RASD family member 3	rasd3	4.1905	3.80914	1.09693	0.133476	2.07408	0.275604	0.599597	0.999804	1	protein_coding	ZDB-GENE-060818-9			GO:0003924;GO:0005525;GO:0007165;GO:0016020;GO:0000166	GTPase activity;GTP binding;signal transduction;membrane;nucleotide binding	molecular_function;biological_process;cellular_component	PTHR24070_SF211	UNCHARACTERIZED	GO:0005575;GO:0007165;GO:0003674;GO:0043167;GO:0003924	cellular_component;signal transduction;molecular_function;ion binding;GTPase activity
ENSONIG00000000179	polo like kinase 1	plk1	1.74683	1.34467	1.307	0.386254	0.757853	0.987305	0.320402	0.999804	1	protein_coding	ZDB-GENE-021115-7	100698269	I3IUE2	GO:0006468;GO:0004672;GO:0005524;GO:0005515;GO:0016740;GO:0000166;GO:0004674;GO:0016301;GO:0016310;GO:0000278	protein phosphorylation;protein kinase activity;ATP binding;protein binding;transferase activity;nucleotide binding;protein serine/threonine kinase activity;kinase activity;phosphorylation;mitotic cell cycle	biological_process;molecular_function	PTHR24345_SF52	SERINE/THREONINE KINASE EC_2.7.11.21 POLO KINASE	GO:0003674;GO:0043167;GO:0016301;GO:0006464;GO:0000278;GO:0007049	molecular_function;ion binding;kinase activity;cellular protein modification process;mitotic cell cycle;cell cycle
ENSONIG00000000180	mitogen-activated protein kinase 6	mapk6	160.215	152.597	1.04962	0.0698679	7.3359	0.456613	0.499211	0.999804	2	protein_coding	ZDB-GENE-050420-7	100709832	I3IUE3;I3IUE4	GO:0004707;GO:0006468;GO:0004672;GO:0005524;GO:0000165	MAP kinase activity;protein phosphorylation;protein kinase activity;ATP binding;MAPK cascade	molecular_function;biological_process	PTHR24055_SF171	MITOGEN ACTIVATED KINASE 6 MAP KINASE 6 MAPK 6 EC_2.7.11.24 EXTRACELLULAR SIGNAL REGULATED KINASE 3 ERK 3	GO:0003674;GO:0043167;GO:0016301;GO:0006464;GO:0007165	molecular_function;ion binding;kinase activity;cellular protein modification process;signal transduction	04150+2.7.11.24
ENSONIG00000000185	ubiquitin specific peptidase 8	usp8	85.5651	81.9103	1.04281	0.0604731	6.42285	0.194896	0.658872	0.999804	2	protein_coding	ZDB-GENE-030131-1949	100712237	I3IUF0;I3IUE9	GO:0006511;GO:0016579;GO:0036459	ubiquitin-dependent protein catabolic process;protein deubiquitination;thiol-dependent ubiquitinyl hydrolase activity	biological_process;molecular_function	PTHR24006_SF350	UBIQUITIN CARBOXYL TERMINAL HYDROLASE 8 EC_3.4.19.12 DEUBIQUITINATING ENZYME 8 UBIQUITIN ISOPEPTIDASE Y UBIQUITIN THIOESTERASE 8 UBIQUITIN SPECIFIC PROCESSING PROTEASE 8	GO:0006464;GO:0009056	cellular protein modification process;catabolic process
ENSONIG00000000186	hexokinase 1	HK1 (1 of many)	673.507	662.148	1.01721	0.0246141	9.42378	0.0643704	0.799717	0.999804	1	protein_coding			I3IUF1	GO:0001678;GO:0005536;GO:0006096;GO:0004396;GO:0005975;GO:0016773;GO:0005524;GO:0016740;GO:0000166;GO:0016301;GO:0016310;GO:0005623;GO:0046835	cellular glucose homeostasis;glucose binding;glycolytic process;hexokinase activity;carbohydrate metabolic process;phosphotransferase activity, alcohol group as acceptor;ATP binding;transferase activity;nucleotide binding;kinase activity;phosphorylation;cell;carbohydrate phosphorylation	biological_process;molecular_function;cellular_component	PTHR19443	KINASE	GO:0003674;GO:0043167;GO:0005975;GO:0016301;GO:0009058;GO:0044281;GO:0009056;GO:0006091;GO:0034641;GO:0051186;GO:0034655;GO:0042592;GO:0005575;GO:0005623	molecular_function;ion binding;carbohydrate metabolic process;kinase activity;biosynthetic process;small molecule metabolic process;catabolic process;generation of precursor metabolites and energy;cellular nitrogen compound metabolic process;cofactor metabolic process;nucleobase-containing compound catabolic process;homeostatic process;cellular_component;cell	00520+2.7.1.1;00500+2.7.1.1;00010+2.7.1.1;00521+2.7.1.1;00524+2.7.1.1;00051+2.7.1.1;00052+2.7.1.1
ENSONIG00000000187	T-box 3	tbx3a	10.7389	11.6642	-1.08531	-0.118101	3.46085	0.274023	0.600646	0.999804	1	protein_coding	ZDB-GENE-070209-80	100698260	I3IUF2	GO:0003700;GO:0005634;GO:0006355;GO:0003677;GO:0035050	DNA-binding transcription factor activity;nucleus;regulation of transcription, DNA-templated;DNA binding;embryonic heart tube development	molecular_function;cellular_component;biological_process	PTHR11267_SF91	T BOX TRANSCRIPTION FACTOR TBX3 T BOX 3	GO:0005575;GO:0043226;GO:0005634;GO:0003674;GO:0003700;GO:0003677;GO:0048856	cellular_component;organelle;nucleus;molecular_function;DNA-binding transcription factor activity;DNA binding;anatomical structure development
ENSONIG00000000189	mediator complex subunit 13 like	MED13L	45.958	41.5364	1.10445	0.143322	5.42772	1.26085	0.26149	0.999804	2	protein_coding				GO:0016592;GO:0003712;GO:0006357;GO:0005634	mediator complex;transcription coregulator activity;regulation of transcription by RNA polymerase II;nucleus	cellular_component;molecular_function;biological_process	PTHR12950	MEDIATOR OF RNA POLYMERASE II TRANSCRIPTION SUBUNIT 13 THYROID HORMONE RECEPTOR ASSOCIATED COMPLEX 240 KDA COMPONENT	GO:0003674;GO:0032991;GO:0005575;GO:0043226;GO:0005634	molecular_function;protein-containing complex;cellular_component;organelle;nucleus
ENSONIG00000000191	zinc finger and BTB domain containing 45	ZBTB45	15.225	13.5209	1.12816	0.173972	3.88206	1.66313	0.197181	0.999804	1	protein_coding				GO:0003676;GO:0005515	nucleic acid binding;protein binding	molecular_function	PTHR11389_SF460	ZINC FINGER AND BTB DOMAIN CONTAINING 45 ZINC FINGER 499	GO:0003674	molecular_function
ENSONIG00000000192			3.53705	3.92841	-1.12061	-0.164288	1.92868	0.268498	0.604341	0.999804	1	protein_coding				GO:0003824	catalytic activity	molecular_function	PTHR24096_SF164	UNCHARACTERIZED	GO:0003674	molecular_function
ENSONIG00000000193	mitochondrial fission process 1	MTFP1	4.10818	5.08493	-1.22941	-0.297967	2.23887	1.15312	0.282897	0.999804	1	protein_coding							PTHR11001	MITOCHONDRIAL FISSION PROCESS 1 MITOCHONDRIAL 18 KDA MTP18
ENSONIG00000000194	deltaA	dla	9.64133	12.9329	-1.33944	-0.421631	3.50052	6.14604	0.0131707	0.999804	1	protein_coding	ZDB-GENE-980526-29			GO:0007275;GO:0007219;GO:0007154;GO:0016021;GO:0005509;GO:0016020	multicellular organism development;Notch signaling pathway;cell communication;integral component of membrane;calcium ion binding;membrane	biological_process;cellular_component;molecular_function	PTHR24044_SF247	DELTA 1 PRECURSOR DROSOPHILA DELTA HOMOLOG 1 DELTA1	GO:0005575;GO:0003674;GO:0043167;GO:0007165;GO:0048856	cellular_component;molecular_function;ion binding;signal transduction;anatomical structure development
ENSONIG00000000196	VIP36-like protein	lman2la	49.8628	50.5925	-1.01243	-0.0178268	5.68003	0.0366069	0.848268	0.999804	2	protein_coding	ZDB-GENE-040715-4	100701135	I3IUG4;I3IUG3	GO:0016020;GO:0016021;GO:0048881	membrane;integral component of membrane;mechanosensory lateral line system development	cellular_component;biological_process	PTHR12223_SF20	VIP36 PRECURSOR LECTIN MANNOSE BINDING 2 LMAN2	GO:0005575;GO:0048856	cellular_component;anatomical structure development
ENSONIG00000000197	rho-related GTP-binding protein RhoU	si:ch211-133l11.10	13.6791	13.8829	-1.01367	-0.0195853	3.82746	0.0145838	0.903878	0.999804	1	protein_coding	ZDB-GENE-141219-14	100704818	I3IUG5	GO:0007264;GO:0003924;GO:0005622;GO:0005525;GO:0000166	small GTPase mediated signal transduction;GTPase activity;intracellular;GTP binding;nucleotide binding	biological_process;molecular_function;cellular_component	PTHR24072_SF148	RHO RELATED GTP BINDING RHOU RHO GTPASE ARHU WNT 1 RESPONSIVE CDC42 HOMOLOG 1 WRCH 1	GO:0003674;GO:0043167;GO:0005575;GO:0005622;GO:0003924;GO:0007165	molecular_function;ion binding;cellular_component;intracellular;GTPase activity;signal transduction
ENSONIG00000000199	rho GTPase-activating protein 19	arhgap19	3.35441	4.52831	-1.35733	-0.440772	2.15312	2.56392	0.109327	0.999804	1	protein_coding	ZDB-GENE-100922-157	100705090	I3IUG7	GO:0007165	signal transduction	biological_process	PTHR14963_SF2	RHO GTPASE ACTIVATING 19 RHO TYPE GTPASE ACTIVATING 19	GO:0007165	signal transduction
ENSONIG00000000200	phosphodiesterase 8A	pde8a	17.8894	16.7077	1.07255	0.101051	4.09871	0.229711	0.631738	0.999804	1	protein_coding	ZDB-GENE-070112-622			GO:0008081;GO:0004114;GO:0006355;GO:0007165;GO:0016787;GO:0046872	phosphoric diester hydrolase activity;3',5'-cyclic-nucleotide phosphodiesterase activity;regulation of transcription, DNA-templated;signal transduction;hydrolase activity;metal ion binding	molecular_function;biological_process	PTHR11347_SF85	HIGH AFFINITY CAMP SPECIFIC AND IBMX INSENSITIVE 3' 5' CYCLIC PHOSPHODIESTERASE 8A EC_3.1.4.53	GO:0007165;GO:0003674;GO:0043167	signal transduction;molecular_function;ion binding
ENSONIG00000000201	WW domain binding protein 1	wbp1	9.15301	8.79201	1.04377	0.0618075	3.14658	0.109107	0.741163	0.999804	2	protein_coding	ZDB-GENE-040426-1830			GO:0016020;GO:0016021	membrane;integral component of membrane	cellular_component	PTHR16209	WW DOMAIN BINDING 1 1	GO:0005575	cellular_component
ENSONIG00000000202	slit homolog 1 protein	slit1b	44.5437	45.5938	-1.02399	-0.0342053	5.52458	0.0635677	0.800943	0.999804	1	protein_coding	ZDB-GENE-030722-4	100705354	I3IUH1	GO:0005509;GO:0005515;GO:0005576;GO:0021602	calcium ion binding;protein binding;extracellular region;cranial nerve morphogenesis	molecular_function;cellular_component;biological_process	PTHR24373_SF39	SLIT HOMOLOG 1 PRECURSOR SLIT 1 MULTIPLE EPIDERMAL GROWTH FACTOR DOMAINS 4 MULTIPLE EGF DOMAINS 4	GO:0003674;GO:0043167;GO:0005575;GO:0005576	molecular_function;ion binding;cellular_component;extracellular region
ENSONIG00000000204	olfactomedin 2b	olfm2b	118.571	113.047	1.04859	0.0684444	6.87912	0.778389	0.377634	0.999804	1	protein_coding	ZDB-GENE-040426-2402						PTHR23192_SF27	NOELIN 2 PRECURSOR OLFACTOMEDIN 2
ENSONIG00000000206			15.4514	17.7058	-1.15178	-0.203868	4.08862	2.34712	0.125515	0.999804	1	protein_coding				GO:0003723;GO:0005634	RNA binding;nucleus	molecular_function;cellular_component	PTHR15744	KH HOMOLOGY DOMAIN CONTAINING 4 BRINGS LOTS OF MONEY 7 PRE SPLICING FACTOR KHDC4	GO:0005575;GO:0043226;GO:0005634;GO:0003674;GO:0003723	cellular_component;organelle;nucleus;molecular_function;RNA binding
ENSONIG00000000207	fibronectin type III and SPRY domain containing 2	FSD2	6.29664	6.56275	-1.04424	-0.06245	2.66289	0.108425	0.741944	0.999804	1	protein_coding			I3IUH6	GO:0005515	protein binding	molecular_function	PTHR24099_SF6	FIBRONECTIN TYPE III AND SPRY DOMAIN CONTAINING 2 SPRY DOMAIN CONTAINING 1	GO:0003674	molecular_function
ENSONIG00000000208			0.84599	0.92556	-1.08824	-0.122002	0.00448971	0.0739698	0.785642	0.999804	1	protein_coding				GO:0032012;GO:0005086;GO:0005543;GO:0005515	regulation of ARF protein signal transduction;ARF guanyl-nucleotide exchange factor activity;phospholipid binding;protein binding	biological_process;molecular_function	PTHR10663_SF115	PH AND SEC7 DOMAIN CONTAINING 1 EXCHANGE FACTOR ADP RIBOSYLATION FACTOR GUANINE NUCLEOTIDE FACTOR 6 EXCHANGE FACTOR ARF6 EXCHANGE FACTOR ARF6 A PLECKSTRIN HOMOLOGY AND SEC7 DOMAIN CONTAINING 1	GO:0003674;GO:0043167;GO:0008289	molecular_function;ion binding;lipid binding
ENSONIG00000000209	WAS protein homolog associated with actin, golgi membranes and microtubules	WHAMM	16.0339	13.8469	1.15828	0.211983	3.96934	2.27197	0.131732	0.999804	1	protein_coding			I3IUH8	GO:0003779	actin binding	molecular_function	PTHR23330	JUNCTION MEDIATING AND REGULATORY	GO:0003674;GO:0008092	molecular_function;cytoskeletal protein binding
ENSONIG00000000211			6.21472	6.4345	-1.04185	-0.0591503	2.68475	0.0757988	0.783074	0.999804	1	protein_coding				GO:0003676	nucleic acid binding	molecular_function	PTHR24384	ZINC FINGER	GO:0003674	molecular_function
ENSONIG00000000212	suppressor APC domain containing 2	SAPCD2	95.5408	95.4117	1.00151	0.00217705	6.57724	0.000277793	0.986702	0.999804	2	protein_coding							PTHR14907_SF2;PTHR14907_SF3	UNCHARACTERIZED;SUPPRESSOR APC DOMAIN CONTAINING 2
ENSONIG00000000213	thyroid hormone receptor interactor 10b	trip10b	2.76762	3.23786	-1.15589	-0.209009	1.56147	0.394911	0.529729	0.999804	1	protein_coding	ZDB-GENE-040426-969			GO:0006897;GO:0030036;GO:0005515	endocytosis;actin cytoskeleton organization;protein binding	biological_process;molecular_function	PTHR12602	FORMIN BINDING 1	GO:0003674;GO:0007010;GO:0006810;GO:0016192	molecular_function;cytoskeleton organization;transport;vesicle-mediated transport
ENSONIG00000000214	homer scaffold protein 2	homer2	30.5433	28.638	1.06798	0.094889	4.94638	0.315574	0.57428	0.999804	1	protein_coding	ZDB-GENE-050522-417	100710362	I3IUI4				PTHR10918_SF2	HOMER HOMOLOG 2 HOMER 2 CUPIDIN VASP/ENA RELATED GENE UP REGULATED DURING SEIZURE AND LTP 2 VESL 2
ENSONIG00000000215			7.055	7.83412	-1.10753	-0.147342	2.95286	0.592771	0.44135	0.999804	1	protein_coding				GO:0003676	nucleic acid binding	molecular_function	PTHR24409_SF10	ZINC FINGER	GO:0003674	molecular_function
ENSONIG00000000216			4.26915	4.12489	1.03376	0.0478986	2.21659	0.053409	0.817234	0.999804	1	protein_coding				GO:0003676	nucleic acid binding	molecular_function	PTHR24409_SF10	ZINC FINGER	GO:0003674	molecular_function
ENSONIG00000000217	transmembrane protein 141	tmem141	26.3865	28.1677	-1.06942	-0.0968346	4.75791	0.633209	0.426181	0.999804	1	protein_coding	ZDB-GENE-060929-272	100698974	I3IUI7				PTHR21694	COILED COIL DOMAIN CONTAINING
ENSONIG00000000218			2.72152	2.17339	1.24113	0.311655	1.53217	0.769379	0.380409	0.999804	1	protein_coding				GO:0003676	nucleic acid binding	molecular_function	PTHR24409_SF10	ZINC FINGER	GO:0003674	molecular_function
ENSONIG00000000219	zinc finger MYND-type containing 19	zmynd19	36.4894	36.8047	-1.00758	-0.0108923	5.18567	0.00437142	0.947285	0.999804	1	protein_coding	ZDB-GENE-030131-4460	100699237	I3IUI9	GO:0046872	metal ion binding	molecular_function	PTHR13244	ZINC FINGER MYND DOMAIN CONTAINING	GO:0003674;GO:0043167	molecular_function;ion binding
ENSONIG00000000220	SH2 domain containing 3A	SH2D3A	0.82722	0.978461	-1.15552	-0.208542	-0.0632956	0.20155	0.653473	0.999804	2	protein_coding			I3IUJ0;I3IUJ1	GO:0005085;GO:0007264	guanyl-nucleotide exchange factor activity;small GTPase mediated signal transduction	molecular_function;biological_process	PTHR14247	BREAST CANCER ANTI ESTROGEN RESISTANCE 3	GO:0007165;GO:0003674	signal transduction;molecular_function
ENSONIG00000000221	BTB domain containing 1	BTBD1	64.6655	65.0457	-1.0051	-0.00734439	6.05812	0.00690082	0.933795	0.999804	1	protein_coding		100691225	I3IUJ2	GO:0005515	protein binding	molecular_function	PTHR24413_SF15	BTB/POZ DOMAIN CONTAINING 1	GO:0003674	molecular_function
ENSONIG00000000225	transmembrane 6 superfamily member 1	TM6SF1	8.66819	8.08618	1.0732	0.101923	3.18593	0.27574	0.599507	0.999804	1	protein_coding		100691495	I3IUJ9	GO:0016020;GO:0016021	membrane;integral component of membrane	cellular_component	PTHR14568	TRANSMEMBRANE 6 SUPERFAMILY MEMBER	GO:0005575	cellular_component
ENSONIG00000000226	vav guanine nucleotide exchange factor 1	VAV1	15.9486	16.6489	-1.03991	-0.0564632	4.03902	0.106683	0.743953	0.999804	2	protein_coding		100699613	I3IUK0;I3IUK1	GO:0005085;GO:0007264;GO:0035556;GO:0035023;GO:0005089;GO:0005515;GO:0046872	guanyl-nucleotide exchange factor activity;small GTPase mediated signal transduction;intracellular signal transduction;regulation of Rho protein signal transduction;Rho guanyl-nucleotide exchange factor activity;protein binding;metal ion binding	molecular_function;biological_process	PTHR22826_SF112	PROTO ONCOGENE VAV	GO:0003674;GO:0007165;GO:0043167	molecular_function;signal transduction;ion binding
ENSONIG00000000227	ubiquitin protein ligase E3 component n-recognin 7	ubr7	45.9006	45.1211	1.01842	0.0263293	5.51881	0.0813002	0.775543	0.999804	1	protein_coding	ZDB-GENE-030131-1535			GO:0061630;GO:0008270;GO:0046872;GO:0016567	ubiquitin protein ligase activity;zinc ion binding;metal ion binding;protein ubiquitination	molecular_function;biological_process	PTHR13513	E3 UBIQUITIN LIGASE UBR7 EC_2.3.2.27 N RECOGNIN 7 RING TYPE E3 UBIQUITIN TRANSFERASE UBR7	GO:0003674;GO:0043167;GO:0006464	molecular_function;ion binding;cellular protein modification process
ENSONIG00000000228	zinc finger (CCCH type), RNA-binding motif and serine/arginine rich 2	zrsr2	13.0236	14.5321	-1.1104	-0.151074	3.72731	1.1318	0.287392	0.999804	1	protein_coding	ZDB-GENE-030131-1495			GO:0089701;GO:0000398;GO:0003723;GO:0046872;GO:0003676	U2AF;mRNA splicing, via spliceosome;RNA binding;metal ion binding;nucleic acid binding	cellular_component;biological_process;molecular_function	PTHR12620	SPLICING FACTOR U2AF KDA SUBUNIT U2 AUXILIARY FACTOR U2 AUXILIARY FACTOR SMALL	GO:0003674;GO:0043167;GO:0003723;GO:0034641;GO:0006397;GO:0032991;GO:0005575	molecular_function;ion binding;RNA binding;cellular nitrogen compound metabolic process;mRNA processing;protein-containing complex;cellular_component
ENSONIG00000000229	AP-1 complex subunit sigma-2	zgc:162858	185.612	195.533	-1.05346	-0.0751299	7.59338	0.650267	0.420017	0.999804	1	protein_coding	ZDB-GENE-030131-7909	100710628	I3IUK4	GO:0030117;GO:0015031;GO:0016192;GO:0006886;GO:0016020	membrane coat;protein transport;vesicle-mediated transport;intracellular protein transport;membrane	cellular_component;biological_process	PTHR11753	AP COMPLEX SUBUNIT SIGMA ADAPTOR COMPLEX SUBUNIT SIGMA ADAPTOR RELATED COMPLEX SUBUNIT SIGMA SIGMA AP SIGMA ADAPTIN ADAPTIN	GO:0006810;GO:0016192;GO:0032991;GO:0005575	transport;vesicle-mediated transport;protein-containing complex;cellular_component
ENSONIG00000000230			4.1225	4.74661	-1.14651	-0.197253	2.11928	0.294972	0.587052	0.999804	1	protein_coding				GO:0016020;GO:0016021	membrane;integral component of membrane	cellular_component			GO:0005575	cellular_component
ENSONIG00000000231	ankyrin repeat and SOCS box containing 2a, tandem duplicate 1	asb2a.1	0.540072	0.973873	-1.81883	-0.863007	-0.345975	2.60743	0.106364	0.999804	1	protein_coding	ZDB-GENE-030131-5355			GO:0035556;GO:0005515;GO:0016567	intracellular signal transduction;protein binding;protein ubiquitination	biological_process;molecular_function	PTHR24196_SF0	ANKYRIN REPEAT AND SOCS BOX 2 ASB 2	GO:0003674;GO:0007165;GO:0006464	molecular_function;signal transduction;cellular protein modification process
ENSONIG00000000234			4.38779	8.55425	-1.94877	-0.962563	2.86697	2.16898	0.14082	0.999804	1	protein_coding				GO:0003950;GO:0016740;GO:0016757	NAD+ ADP-ribosyltransferase activity;transferase activity;transferase activity, transferring glycosyl groups	molecular_function	PTHR14453_SF48	POLY [ADP RIBOSE] POLYMERASE PARP EC_2.4.2.30	GO:0016757	transferase activity, transferring glycosyl groups
ENSONIG00000000237	protein phosphatase 4, regulatory subunit 4	ppp4r4	71.1293	68.1976	1.04318	0.0609924	6.11928	0.506697	0.476572	0.999804	1	protein_coding	ZDB-GENE-041001-164						PTHR21467	SERINE/THREONINE PHOSPHATASE 4 REGULATORY SUBUNIT 4
ENSONIG00000000238			0.600496	0.817466	-1.35823	-0.441723	-0.277046	0.0307379	0.860826	0.999804	1	protein_coding							PTHR31025	UNCHARACTERIZED
ENSONIG00000000241			0.718832	1.13607	-1.58091	-0.660756	0.200723	0.807433	0.36888	0.999804	1	protein_coding				GO:0003950;GO:0016740;GO:0016757	NAD+ ADP-ribosyltransferase activity;transferase activity;transferase activity, transferring glycosyl groups	molecular_function	PTHR14453_SF48	POLY [ADP RIBOSE] POLYMERASE PARP EC_2.4.2.30	GO:0016757	transferase activity, transferring glycosyl groups
ENSONIG00000000242			144.323	141.463	1.02008	0.0286833	7.18551	0.106031	0.744709	0.999804	1	protein_coding				GO:0005615	extracellular space	cellular_component	PTHR11461_SF31	Z DEPENDENT PROTEASE INHIBITOR PRECURSOR PZ DEPENDENT PROTEASE INHIBITOR PZI SERPIN A10	GO:0005575;GO:0005615	cellular_component;extracellular space
ENSONIG00000000245	X-ray repair complementing defective repair in Chinese hamster cells 3	xrcc3	5.16674	4.21116	1.21624	0.282425	2.28818	1.49243	0.22184	0.999804	1	protein_coding	ZDB-GENE-050320-116			GO:0006281;GO:0008094;GO:0005524;GO:0003677	DNA repair;DNA-dependent ATPase activity;ATP binding;DNA binding	biological_process;molecular_function	PTHR22942_SF24	DNA REPAIR XRCC3 X RAY REPAIR CROSS COMPLEMENTING 3	GO:0003674;GO:0003677;GO:0043167;GO:0016887;GO:0006259;GO:0006950;GO:0034641	molecular_function;DNA binding;ion binding;ATPase activity;DNA metabolic process;response to stress;cellular nitrogen compound metabolic process
ENSONIG00000000246	BRF1, RNA polymerase III transcription initiation factor subunit	BRF1	19.7146	18.3789	1.06807	0.0950054	4.25145	0.4091	0.522427	0.999804	1	protein_coding				GO:0000126;GO:0006383;GO:0000995;GO:0070897;GO:0017025;GO:0006355;GO:0046872	transcription factor TFIIIB complex;transcription by RNA polymerase III;RNA polymerase III general transcription initiation factor activity;transcription preinitiation complex assembly;TBP-class protein binding;regulation of transcription, DNA-templated;metal ion binding	cellular_component;biological_process;molecular_function	PTHR11618_SF4	TRANSCRIPTION FACTOR IIIB KDA SUBUNIT B RELATED FACTOR 1 BRF 1	GO:0003674;GO:0008134;GO:0022607;GO:0065003;GO:0009058;GO:0034641;GO:0032991;GO:0005575;GO:0043167	molecular_function;transcription factor binding;cellular component assembly;protein-containing complex assembly;biosynthetic process;cellular nitrogen compound metabolic process;protein-containing complex;cellular_component;ion binding
ENSONIG00000000248	small nuclear ribonucleoprotein polypeptides B and B1	snrpb	24.8354	21.3819	1.16096	0.215314	4.413	0.368152	0.544013	0.999804	1	protein_coding	ZDB-GENE-040426-1819	100700782	I3IUM7	GO:0005634;GO:0003723	nucleus;RNA binding	cellular_component;molecular_function	PTHR10701_SF2	SMALL NUCLEAR RIBONUCLEOPROTEIN ASSOCIATED B' SNRNP B' SNRPB' SM B' SM B' SMB'	GO:0005575;GO:0043226;GO:0005634;GO:0003674;GO:0003723	cellular_component;organelle;nucleus;molecular_function;RNA binding
ENSONIG00000000250	E3 ubiquitin-protein ligase RNF182		41.6238	40.9631	1.01818	0.0259867	5.36067	0.0676388	0.794806	0.999804	2	protein_coding		100701052	I3IUN0;I3IUM9	GO:0016020;GO:0016021	membrane;integral component of membrane	cellular_component	PTHR13139_SF25	E3 UBIQUITIN LIGASE RNF182 EC_2.3.2.27 RING FINGER 182 RING TYPE E3 UBIQUITIN TRANSFERASE RNF182	GO:0005575	cellular_component
ENSONIG00000000251	ubiquitin like 5	UBL5	29.8276	29.9684	-1.0042	-0.00603995	4.96909	0.0012	0.972366	0.999804	1	protein_coding		100694823	I3IUN1	GO:0006464;GO:0005515	cellular protein modification process;protein binding	biological_process;molecular_function	PTHR13042_SF0	UNCHARACTERIZED	GO:0003674;GO:0006464	molecular_function;cellular protein modification process
ENSONIG00000000253	peptidylprolyl cis/trans isomerase, NIMA-interacting 1	pin1	284.936	278.129	1.02461	0.0350739	8.13505	0.109837	0.74033	0.999804	1	protein_coding	ZDB-GENE-040426-1714	100695080	I3IUN3	GO:0003755;GO:0005515;GO:0016853;GO:0000413;GO:0008045;GO:1902229;GO:0005634;GO:0005737	peptidyl-prolyl cis-trans isomerase activity;protein binding;isomerase activity;protein peptidyl-prolyl isomerization;motor neuron axon guidance;regulation of intrinsic apoptotic signaling pathway in response to DNA damage;nucleus;cytoplasm	molecular_function;biological_process;cellular_component	PTHR10657_SF4	PEPTIDYL PROLYL CIS TRANS ISOMERASE NIMA INTERACTING 1 EC_5.2.1.8 PEPTIDYL PROLYL CIS TRANS ISOMERASE PIN1 PPIASE PIN1	GO:0003674;GO:0016853;GO:0006464;GO:0005575;GO:0043226;GO:0005634;GO:0005737	molecular_function;isomerase activity;cellular protein modification process;cellular_component;organelle;nucleus;cytoplasm
ENSONIG00000000254	ubiquitin-conjugating enzyme E2C	ube2c	3.20812	3.89597	-1.21419	-0.279997	1.884	1.24306	0.264881	0.999804	1	protein_coding	ZDB-GENE-051030-48			GO:0016740;GO:0000166;GO:0005524	transferase activity;nucleotide binding;ATP binding	molecular_function	PTHR24067_SF44	UBIQUITIN CONJUGATING ENZYME E2 C EC_2.3.2.23 E3 INDEPENDENT E2 UBIQUITIN CONJUGATING ENZYME C EC_2.3.2.- 24 E2 UBIQUITIN CONJUGATING ENZYME C UBIQUITIN CARRIER C UBIQUITIN LIGASE C	GO:0003674;GO:0043167	molecular_function;ion binding
ENSONIG00000000255	ligand dependent nuclear receptor corepressor	lcor	9.116	8.808	1.03283	0.0466035	3.18592	0.0305951	0.861147	0.999804	1	protein_coding	ZDB-GENE-061201-6			GO:0003677;GO:0005634	DNA binding;nucleus	molecular_function;cellular_component	PTHR21545_SF14	LIGAND DEPENDENT COREPRESSOR LCOR MBLK1 RELATED 2	GO:0003674;GO:0003677;GO:0005575;GO:0043226;GO:0005634	molecular_function;DNA binding;cellular_component;organelle;nucleus
ENSONIG00000000256	BTB/POZ domain-containing protein 6-B		43.082	45.7645	-1.0629	-0.088009	5.46323	0.56072	0.45397	0.999804	1	protein_coding		102078383	I3IUN6	GO:0005515	protein binding	molecular_function	PTHR24413_SF4	BTB/POZ DOMAIN CONTAINING 6	GO:0003674	molecular_function
ENSONIG00000000257	MORN repeat-containing protein 4		0.915902	1.30583	-1.41459	-0.500381	0.259567	1.24957	0.263636	0.999804	1	protein_coding		100690678	I3IUN7				TF624050	MORN REPEAT CONTAINING 4
ENSONIG00000000259	RNA polymerase II subunit J	polr2j	17.7024	17.2829	1.02224	0.0317298	4.16954	0.0377126	0.846021	0.999804	1	protein_coding	ZDB-GENE-050522-120	100705637	I3IUP1	GO:0005665;GO:0006366;GO:0001055;GO:0006351;GO:0003899;GO:0003677;GO:0046983	RNA polymerase II, core complex;transcription by RNA polymerase II;RNA polymerase II activity;transcription, DNA-templated;DNA-directed 5'-3' RNA polymerase activity;DNA binding;protein dimerization activity	cellular_component;biological_process;molecular_function	PTHR13946_SF25	DNA DIRECTED RNA POLYMERASE II SUBUNIT RPB11 RNA POLYMERASE II SUBUNIT B11 DNA DIRECTED RNA POLYMERASE II SUBUNIT	GO:0003674;GO:0003677;GO:0016779;GO:0009058;GO:0034641;GO:0032991;GO:0005575	molecular_function;DNA binding;nucleotidyltransferase activity;biosynthetic process;cellular nitrogen compound metabolic process;protein-containing complex;cellular_component	00230+2.7.7.6;00240+2.7.7.6
ENSONIG00000000260	sodium-dependent multivitamin transporter	slc5a6a	118.741	131.645	-1.10916	-0.149469	6.90826	1.05955	0.303318	0.999804	1	protein_coding	ZDB-GENE-041001-177	100707849	I3IUP2	GO:0055085;GO:0022857;GO:0016020;GO:0016021	transmembrane transport;transmembrane transporter activity;membrane;integral component of membrane	biological_process;molecular_function;cellular_component	PTHR11819_SF124	SODIUM DEPENDENT MULTIVITAMIN TRANSPORTER NA + DEPENDENT MULTIVITAMIN TRANSPORTER SOLUTE CARRIER FAMILY 5 MEMBER 6	GO:0005575;GO:0022857;GO:0003674;GO:0006810;GO:0055085	cellular_component;transmembrane transporter activity;molecular_function;transport;transmembrane transport
ENSONIG00000000261	PDX1 C-terminal inhibiting factor 1	pcif1	60.781	61.5455	-1.01257	-0.0180235	5.95801	0.0338489	0.854029	0.999804	1	protein_coding	ZDB-GENE-120920-2	100702140	I3IUP3	GO:0005515;GO:0016422;GO:1904047;GO:0080009	protein binding;mRNA (2'-O-methyladenosine-N6-)-methyltransferase activity;S-adenosyl-L-methionine binding;mRNA methylation	molecular_function;biological_process	PTHR21727	PHOSPHORYLATED CTD INTERACTING FACTOR 1	GO:0003674;GO:0008168;GO:0034641	molecular_function;methyltransferase activity;cellular nitrogen compound metabolic process
ENSONIG00000000262	4-hydroxy-2-oxoglutarate aldolase 1	hoga1	1.9409	2.07474	-1.07695	-0.106954	1.08974	0.102023	0.749415	0.999804	1	protein_coding	ZDB-GENE-040426-2242	100690946	I3IUP4	GO:0016829;GO:0003824	lyase activity;catalytic activity	molecular_function	PTHR12128	N ACETYLNEURAMINATE LYASE NALASE EC_4.1.3.3 N ACETYLNEURAMINATE PYRUVATE LYASE N ACETYLNEURAMINIC ACID ALDOLASE SIALATE LYASE SIALATE PYRUVATE LYASE SIALIC ACID ALDOLASE SIALIC ACID LYASE	GO:0003674;GO:0016829	molecular_function;lyase activity	00300+4.3.3.7;00261+4.3.3.7
ENSONIG00000000263	haloacid dehalogenase-like hydrolase domain-containing 5		1.91731	2.15368	-1.1474	-0.198373	1.10776	0.296932	0.585812	0.999804	1	protein_coding		100705901	I3IUP5				PTHR14269_SF12	CAT EYE SYNDROME CRITICAL REGION 5
ENSONIG00000000264	cyclin and CBS domain divalent metal cation transport mediator 1	CNNM1 (1 of many)	19.8053	18.4969	1.06959	0.097063	4.35107	0.430571	0.511709	0.999804	2	protein_coding			I3IUP7;I3IUP6	GO:0016020;GO:0016021	membrane;integral component of membrane	cellular_component	PTHR12064_SF28	METAL TRANSPORTER CNNM1 ANCIENT CONSERVED DOMAIN CONTAINING 1 CYCLIN M1	GO:0005575	cellular_component
ENSONIG00000000266	ribosomal protein L7 like 1	rpl7l1	48.9584	44.8394	1.09192	0.126872	5.56511	1.31885	0.250799	0.999804	1	protein_coding	ZDB-GENE-030131-970	100700318	I3IUP9				PTHR11524	60S RIBOSOMAL L7
ENSONIG00000000267	ISY1 splicing factor homolog	isy1	16.2848	16.4726	-1.01174	-0.0168336	3.9732	0.00832975	0.92728	0.999804	2	protein_coding	ZDB-GENE-030131-5864			GO:0000350	generation of catalytic spliceosome for second transesterification step	biological_process	PTHR13021	PRE SPLICING FACTOR ISY1	GO:0022607;GO:0022618;GO:0065003	cellular component assembly;ribonucleoprotein complex assembly;protein-containing complex assembly
ENSONIG00000000268	glutamic-oxaloacetic transaminase 1	GOT1 (1 of many)	180.847	181.204	-1.00101	-0.00146138	7.50033	0.000221728	0.98812	0.999804	1	protein_coding			I3IUQ2	GO:0008483;GO:0009058;GO:0006520;GO:0030170;GO:0003824;GO:0016740;GO:0004069	transaminase activity;biosynthetic process;cellular amino acid metabolic process;pyridoxal phosphate binding;catalytic activity;transferase activity;L-aspartate:2-oxoglutarate aminotransferase activity	molecular_function;biological_process	PTHR11879	ASPARTATE AMINOTRANSFERASE EC_2.6.1.1 EC_2.6.1.- AMINOTRANSFERASE TRANSAMINASE TRANSAMINASE TRANSAMINASE A	GO:0003674;GO:0043167;GO:0044281;GO:0006520;GO:0009058	molecular_function;ion binding;small molecule metabolic process;cellular amino acid metabolic process;biosynthetic process	00220+2.6.1.1;00330+2.6.1.1;00401+2.6.1.1;00350+2.6.1.1;00710+2.6.1.1;00960+2.6.1.1;00360+2.6.1.1;00400+2.6.1.1;00250+2.6.1.1;00270+2.6.1.1;00950+2.6.1.1
ENSONIG00000000269	CCHC-type zinc finger nucleic acid binding protein	CNBP	0.809917	0.988423	-1.25531	-0.328043	0.134361	0.684225	0.408136	0.999804	1	protein_coding				GO:0008270;GO:0003676	zinc ion binding;nucleic acid binding	molecular_function	PTHR23002	ZINC FINGER	GO:0003674;GO:0043167	molecular_function;ion binding
ENSONIG00000000272	si:ch211-15p9.2	si:ch211-15p9.2	2.23337	2.65653	-1.17416	-0.231624	1.32266	0.693919	0.404835	0.999804	1	protein_coding	ZDB-GENE-060503-577			GO:0004722;GO:0043169;GO:0006470;GO:0003824;GO:0016787;GO:0046872;GO:0004721	protein serine/threonine phosphatase activity;cation binding;protein dephosphorylation;catalytic activity;hydrolase activity;metal ion binding;phosphoprotein phosphatase activity	molecular_function;biological_process	PTHR13832_SF213	[PYRUVATE DEHYDROGENASE [ACETYL TRANSFERRING]] PHOSPHATASE 1 MITOCHONDRIAL PRECURSOR PDP 1 EC_3.1.3.43 PHOSPHATASE 2C PYRUVATE DEHYDROGENASE PHOSPHATASE CATALYTIC SUBUNIT 1 PDPC 1	GO:0003674;GO:0006464;GO:0043167;GO:0016791	molecular_function;cellular protein modification process;ion binding;phosphatase activity	04660+3.1.3.16;04658+3.1.3.16
ENSONIG00000000273	protein cornichon homolog 3	cnih3	78.318	83.526	-1.06519	-0.0911046	6.33263	0.740257	0.389579	0.999804	1	protein_coding	ZDB-GENE-041001-180	100708389	I3IUQ7	GO:0016192;GO:0016020;GO:0016021	vesicle-mediated transport;membrane;integral component of membrane	biological_process;cellular_component	PTHR12290	CORNICHON HOMOLOG CNIH CORNICHON FAMILY AMPA RECEPTOR AUXILIARY	GO:0006810;GO:0016192;GO:0005575	transport;vesicle-mediated transport;cellular_component
ENSONIG00000000274			6.94052	6.5817	1.05882	0.0824553	2.74194	0.177467	0.67356	0.999804	1	protein_coding				GO:0006397;GO:0003723;GO:0003676;GO:0005634	mRNA processing;RNA binding;nucleic acid binding;nucleus	biological_process;molecular_function;cellular_component	PTHR24012_SF301	RNA BINDING 39 1 RNA BINDING MOTIF 39 RNA BINDING REGION CONTAINING 2	GO:0005575;GO:0043226;GO:0005634;GO:0003674;GO:0003723;GO:0034641;GO:0006397	cellular_component;organelle;nucleus;molecular_function;RNA binding;cellular nitrogen compound metabolic process;mRNA processing
ENSONIG00000000275			5.15703	4.11036	1.26387	0.337844	2.22202	2.10753	0.146576	0.999804	1	protein_coding				GO:0003676	nucleic acid binding	molecular_function	PTHR23226_SF51	UNCHARACTERIZED	GO:0003674	molecular_function
ENSONIG00000000277	SMG7 nonsense mediated mRNA decay factor	smg7	19.9614	20.0967	-1.00486	-0.00700042	4.37356	0.00218031	0.962757	0.999804	1	protein_coding	ZDB-GENE-030131-9122			GO:0005515;GO:0043009	protein binding;chordate embryonic development	molecular_function;biological_process	PTHR15696_SF0	SMG7 EST1 C SMG 7 HOMOLOG	GO:0003674;GO:0048856;GO:0009790	molecular_function;anatomical structure development;embryo development
ENSONIG00000000278	TSEN2 tRNA splicing endonuclease subunit	tsen2	15.8499	18.2283	-1.15012	-0.201784	4.10516	1.59062	0.207238	0.999804	1	protein_coding	ZDB-GENE-060929-918			GO:0000214;GO:0006388;GO:0000213;GO:0004518;GO:0003676;GO:0005634;GO:0090305;GO:0016829;GO:0008033;GO:0090501;GO:0090502	tRNA-intron endonuclease complex;tRNA splicing, via endonucleolytic cleavage and ligation;tRNA-intron endonuclease activity;nuclease activity;nucleic acid binding;nucleus;nucleic acid phosphodiester bond hydrolysis;lyase activity;tRNA processing;RNA phosphodiester bond hydrolysis;RNA phosphodiester bond hydrolysis, endonucleolytic	cellular_component;biological_process;molecular_function	PTHR21227	TRNA SPLICING ENDONUCLEASE SUBUNIT SEN2 EC_4.6.1.16 TRNA INTRON ENDONUCLEASE SEN2	GO:0003674;GO:0004518;GO:0034641;GO:0006399;GO:0032991;GO:0005575;GO:0043226;GO:0005634;GO:0016829	molecular_function;nuclease activity;cellular nitrogen compound metabolic process;tRNA metabolic process;protein-containing complex;cellular_component;organelle;nucleus;lyase activity
ENSONIG00000000280	MKRN2 opposite strand, tandem duplicate 2	mkrn2os.2	1.17412	1.41097	-1.17337	-0.230655	0.503391	0.37458	0.540518	0.999804	1	protein_coding	ZDB-GENE-160114-87						TF604097	UNCHARACTERIZED
ENSONIG00000000281	makorin, ring finger protein, 2	mkrn2	18.4994	18.5226	-1.00336	-0.00483384	4.24554	0.00124902	0.971807	0.999804	1	protein_coding	ZDB-GENE-020213-2			GO:0046872	metal ion binding	molecular_function	PTHR11224	E3 UBIQUITIN LIGASE MAKORIN EC_2.3.2.27 RING TYPE E3 UBIQUITIN TRANSFERASE MAKORIN	GO:0003674;GO:0043167	molecular_function;ion binding
ENSONIG00000000282			11.0024	8.72547	1.25884	0.33209	3.28429	3.36371	0.0666477	0.999804	1	protein_coding				GO:0000976;GO:0003676	transcription regulatory region sequence-specific DNA binding;nucleic acid binding	molecular_function	PTHR24409_SF21	ZINC FINGER	GO:0003674;GO:0003677	molecular_function;DNA binding
ENSONIG00000000283	nicotinamide nucleotide adenylyltransferase 2	nmnat2	112.186	102.066	1.09955	0.136917	6.78031	2.09348	0.147929	0.999804	1	protein_coding	ZDB-GENE-030131-8201	100697307	I3IUR7	GO:0009058;GO:0003824	biosynthetic process;catalytic activity	biological_process;molecular_function	PTHR12039	NICOTINAMIDE/NICOTINIC ACID MONONUCLEOTIDE ADENYLYLTRANSFERASE 2 NMN/NAMN ADENYLYLTRANSFERASE 2 EC_2.7.7.1 EC_2.7.7.- 18 NICOTINAMIDE MONONUCLEOTIDE ADENYLYLTRANSFERASE 2 NMN ADENYLYLTRANSFERASE 2 NICOTINATE NUCLEOTIDE ADENYLYLTRANSFERASE 2 NAMN ADENYLYLTRANSFERASE 2	GO:0003674;GO:0009058	molecular_function;biosynthetic process
ENSONIG00000000284	TOX high mobility group box family member 4	tox4b	10.1268	11.08	-1.0955	-0.131593	3.44282	0.517046	0.472104	0.999804	1	protein_coding	ZDB-GENE-080220-49	100692575	I3IUR8	GO:0003677;GO:0005634	DNA binding;nucleus	molecular_function;cellular_component	PTHR13711_SF143	TOX HIGH MOBILITY GROUP BOX FAMILY MEMBER 4	GO:0003674;GO:0003677;GO:0005575;GO:0043226;GO:0005634	molecular_function;DNA binding;cellular_component;organelle;nucleus
ENSONIG00000000285	solute carrier family 25 member 28	SLC25A28 (1 of many)	21.9438	22.0708	-1.00458	-0.00658988	4.44045	0.00204688	0.963914	0.999804	1	protein_coding			I3IUR9	GO:0022857;GO:0016020;GO:0016021;GO:0055085	transmembrane transporter activity;membrane;integral component of membrane;transmembrane transport	molecular_function;cellular_component;biological_process	PTHR24089_SF205	MITOFERRIN 2 MITOCHONDRIAL RNA SPLICING 3/4 HOMOLOG MRS3/4 MITOCHONDRIAL IRON TRANSPORTER 2 SOLUTE CARRIER FAMILY 25 MEMBER 28	GO:0022857;GO:0003674;GO:0005575;GO:0006810;GO:0055085	transmembrane transporter activity;molecular_function;cellular_component;transport;transmembrane transport
ENSONIG00000000286	ectonucleoside triphosphate diphosphohydrolase 7	ENTPD7	16.9694	16.2316	1.04426	0.0624785	4.09375	0.145338	0.703031	0.999804	1	protein_coding			I3IUS0	GO:0016787;GO:0016020;GO:0016021	hydrolase activity;membrane;integral component of membrane	molecular_function;cellular_component	PTHR11782	ECTONUCLEOSIDE TRIPHOSPHATE DIPHOSPHOHYDROLASE NTPDASE	GO:0005575	cellular_component
ENSONIG00000000287	solute carrier family 12 member 6	SLC12A6	17.1229	19.4526	-1.13454	-0.182104	4.2412	1.50943	0.219226	0.999804	2	protein_coding			I3IUS1;I3IUS2	GO:0005887;GO:1902476;GO:0071477;GO:0015379;GO:0006811;GO:0005215;GO:0055085;GO:0016020;GO:0016021;GO:0071805	integral component of plasma membrane;chloride transmembrane transport;cellular hypotonic salinity response;potassium:chloride symporter activity;ion transport;transporter activity;transmembrane transport;membrane;integral component of membrane;potassium ion transmembrane transport	cellular_component;biological_process;molecular_function	PTHR11827_SF51	SOLUTE CARRIER FAMILY 12 MEMBER 6 ELECTRONEUTRAL POTASSIUM CHLORIDE COTRANSPORTER 3 K CL COTRANSPORTER 3	GO:0005575;GO:0006810;GO:0055085;GO:0003674;GO:0022857;GO:0006950	cellular_component;transport;transmembrane transport;molecular_function;transmembrane transporter activity;response to stress
ENSONIG00000000288	laminin subunit gamma 2	LAMC2	2.13803	1.68606	1.28901	0.366266	0.911219	0.387025	0.533867	0.999804	1	protein_coding			I3IUS3	GO:0070831;GO:0005604;GO:0048731;GO:0016020;GO:0016021	basement membrane assembly;basement membrane;system development;membrane;integral component of membrane	biological_process;cellular_component	PTHR10574_SF79	LAMININ SUBUNIT GAMMA 2 PRECURSOR EPILIGRIN SUBUNIT GAMMA KALININ SUBUNIT GAMMA KALININ/NICEIN/EPILIGRIN 100 KDA SUBUNIT LAMININ B2T CHAIN LAMININ 5 SUBUNIT GAMMA NICEIN SUBUNIT GAMMA	GO:0048856;GO:0022607;GO:0030198;GO:0005575;GO:0031012	anatomical structure development;cellular component assembly;extracellular matrix organization;cellular_component;extracellular matrix
ENSONIG00000000289	family with sequence similarity 107 member A	si:ch211-236d3.4	19.3779	19.5512	-1.00966	-0.0138727	4.32336	0.00958781	0.921998	0.999804	1	protein_coding	ZDB-GENE-141216-56		I3IUS4				PTHR16768	ACTIN ASSOCIATED FAM107A
ENSONIG00000000290	phosphatidylinositol-4-phosphate 3-kinase, catalytic subunit type 2 beta	pik3c2b	54.8786	53.1331	1.03361	0.047687	5.75516	0.217263	0.641134	0.999804	1	protein_coding	ZDB-GENE-050309-145			GO:0048015;GO:0046854;GO:0035091;GO:0016301;GO:0016740;GO:0016310	phosphatidylinositol-mediated signaling;phosphatidylinositol phosphorylation;phosphatidylinositol binding;kinase activity;transferase activity;phosphorylation	biological_process;molecular_function	PTHR10048_SF30	PHOSPHATIDYLINOSITOL 4 PHOSPHATE 3 KINASE C2 DOMAIN CONTAINING SUBUNIT BETA PI3K C2 BETA PTDINS 3 KINASE C2 SUBUNIT BETA EC_2.7.1.154 C2 PI3K PHOSPHOINOSITIDE 3 KINASE C2 BETA	GO:0016301;GO:0003674;GO:0043167;GO:0008289;GO:0006629;GO:0007165	kinase activity;molecular_function;ion binding;lipid binding;lipid metabolic process;signal transduction
ENSONIG00000000291	NOP10 ribonucleoprotein	nop10	9.36999	9.65241	-1.02887	-0.0410614	3.28423	0.0417503	0.838097	0.999804	1	protein_coding	ZDB-GENE-041007-4	100692034	I3IUS6	GO:0042254;GO:0030515;GO:0001522;GO:0006364;GO:0060215	ribosome biogenesis;snoRNA binding;pseudouridine synthesis;rRNA processing;primitive hemopoiesis	biological_process;molecular_function	PTHR13305_SF0	UNCHARACTERIZED	GO:0034641;GO:0003674;GO:0003723;GO:0042254;GO:0048856	cellular nitrogen compound metabolic process;molecular_function;RNA binding;ribosome biogenesis;anatomical structure development
ENSONIG00000000293	DExH-box helicase 9	dhx9	25.6426	24.8106	1.03257	0.0462328	4.68725	0.0912088	0.762646	0.999804	1	protein_coding	ZDB-GENE-070912-171	100697569	I3IUS8	GO:0004386;GO:0005524;GO:0003676;GO:0000166;GO:0016787;GO:0003723;GO:0009615	helicase activity;ATP binding;nucleic acid binding;nucleotide binding;hydrolase activity;RNA binding;response to virus	molecular_function;biological_process	PTHR18934_SF84	ATP DEPENDENT RNA HELICASE A EC_3.6.4.13 DEAH BOX 9 NUCLEAR DNA HELICASE II NDH II	GO:0003674;GO:0043167;GO:0004386;GO:0003723	molecular_function;ion binding;helicase activity;RNA binding
ENSONIG00000000294			7.9219	7.35963	1.06932	0.0966961	2.99753	0.210094	0.646694	0.999804	1	protein_coding				GO:0006986;GO:0003700;GO:0006355	response to unfolded protein;DNA-binding transcription factor activity;regulation of transcription, DNA-templated	biological_process;molecular_function	PTHR21552	CREB3 REGULATORY FACTOR LUMAN RECRUITMENT FACTOR LRF	GO:0003674;GO:0003700;GO:0006950	molecular_function;DNA-binding transcription factor activity;response to stress
ENSONIG00000000295	V-type proton ATPase subunit e 2	atpv0e2	73.4219	73.4869	1.00066	0.000945442	6.18388	8.76308e-05	0.992531	0.999804	1	protein_coding	ZDB-GENE-050522-135	100691746	I3IUT0	GO:0033179;GO:0015078;GO:0015991;GO:0016020;GO:0016021;GO:0006811;GO:0016787	proton-transporting V-type ATPase, V0 domain;proton transmembrane transporter activity;ATP hydrolysis coupled proton transport;membrane;integral component of membrane;ion transport;hydrolase activity	cellular_component;molecular_function;biological_process	PTHR12263_SF2	V TYPE PROTON ATPASE SUBUNIT E 2 V ATPASE SUBUNIT E 2 VACUOLAR PROTON PUMP SUBUNIT E 2	GO:0006810;GO:0055085;GO:0022857;GO:0003674;GO:0032991;GO:0005575	transport;transmembrane transport;transmembrane transporter activity;molecular_function;protein-containing complex;cellular_component
ENSONIG00000000296	ER membrane protein complex subunit 4	emc4	139.994	137.357	1.01921	0.0274467	7.12606	0.0991264	0.752881	0.999804	1	protein_coding	ZDB-GENE-040426-1891	100692304	I3IUT1	GO:0016020;GO:0016021	membrane;integral component of membrane	cellular_component	PTHR19315_SF9	ER MEMBRANE COMPLEX SUBUNIT 4 TRANSMEMBRANE 85	GO:0005575	cellular_component
ENSONIG00000000297			1.7764	2.27508	-1.28843	-0.36561	1.09327	0.988157	0.320193	0.999804	2	protein_coding				GO:0005515;GO:0046872;GO:0003676;GO:0003723	protein binding;metal ion binding;nucleic acid binding;RNA binding	molecular_function	PTHR22904_SF314	TETRATRICOPEPTIDE REPEAT 31 TPR REPEAT 31	GO:0003674;GO:0043167;GO:0003723	molecular_function;ion binding;RNA binding
ENSONIG00000000298	aldehyde dehydrogenase 4 family, member A1	aldh4a1	41.9254	43.9135	-1.0483	-0.0680492	5.45038	0.356867	0.550251	0.999804	1	protein_coding	ZDB-GENE-040426-1179			GO:0010133;GO:0003842;GO:0016620;GO:0055114;GO:0016491	proline catabolic process to glutamate;1-pyrroline-5-carboxylate dehydrogenase activity;oxidoreductase activity, acting on the aldehyde or oxo group of donors, NAD or NADP as acceptor;oxidation-reduction process;oxidoreductase activity	biological_process;molecular_function	PTHR11699_SF18	DELTA 1 PYRROLINE 5 CARBOXYLATE DEHYDROGENASE MITOCHONDRIAL PRECURSOR P5C DEHYDROGENASE EC_1.2.1.88 ALDEHYDE DEHYDROGENASE FAMILY 4 MEMBER A1 L GLUTAMATE GAMMA SEMIALDEHYDE DEHYDROGENASE	GO:0016491;GO:0044281;GO:0009056;GO:0006520	oxidoreductase activity;small molecule metabolic process;catabolic process;cellular amino acid metabolic process	00330+1.2.1.88;00250+1.2.1.88
ENSONIG00000000299			0.747658	0.813202	-1.08391	-0.116248	-0.20341	0.0525806	0.818632	0.999804	1	protein_coding							PTHR12035	SIALIC ACID BINDING IG LECTIN SIGLEC
ENSONIG00000000300			5.19529	4.62075	1.1277	0.173385	2.37699	0.465264	0.495174	0.999804	1	protein_coding							PTHR11830_SF3	UBIQUITIN CARBOXYL TERMINAL HYDROLASE CYLD EC_3.4.19.12 DEUBIQUITINATING ENZYME CYLD UBIQUITIN THIOESTERASE CYLD UBIQUITIN SPECIFIC PROCESSING PROTEASE CYLD
ENSONIG00000000303			1.01597	0.956468	1.0586	0.0821627	0.0362606	0.0418208	0.837962	0.999804	2	protein_coding							PTHR12035	SIALIC ACID BINDING IG LECTIN SIGLEC
ENSONIG00000000304	ring finger protein 123	rnf123	41.7555	41.8098	1.00122	0.00175337	5.37038	0.000208645	0.988475	0.999804	2	protein_coding	ZDB-GENE-050208-529		I3IUU2;I3IUU1	GO:0005515	protein binding	molecular_function	PTHR13363_SF1	E3 UBIQUITIN LIGASE RNF123 EC_2.3.2.27 KIP1 UBIQUITINATION PROMOTING COMPLEX 1 RING FINGER 123 RING TYPE E3 UBIQUITIN TRANSFERASE RNF123	GO:0003674	molecular_function
ENSONIG00000000305	laminin, gamma 1	lamc1	6.74656	6.38917	1.05872	0.08232	2.69426	0.134211	0.714105	0.999804	2	protein_coding	ZDB-GENE-021226-3			GO:0001654;GO:0007411;GO:0007420;GO:0007517;GO:0007519;GO:0007634;GO:0030903;GO:0031290;GO:0048570;GO:0048854;GO:0050908;GO:0061053	eye development;axon guidance;brain development;muscle organ development;skeletal muscle tissue development;optokinetic behavior;notochord development;retinal ganglion cell axon guidance;notochord morphogenesis;brain morphogenesis;detection of light stimulus involved in visual perception;somite development	biological_process	PTHR10574_SF239	LAMININ SUBUNIT GAMMA 1 PRECURSOR	GO:0048856;GO:0050877;GO:0009790	anatomical structure development;nervous system process;embryo development
ENSONIG00000000307	adenylate cyclase type 2		8.56139	8.3957	1.02644	0.0376439	3.1087	0.0308743	0.860521	0.999804	2	protein_coding		100693919	I3IUU7;I3IUU6	GO:0005886;GO:0006171;GO:0004016;GO:0009190;GO:0016849;GO:0035556;GO:0016020;GO:0016021;GO:0000166;GO:0005524;GO:0046872;GO:0016829	plasma membrane;cAMP biosynthetic process;adenylate cyclase activity;cyclic nucleotide biosynthetic process;phosphorus-oxygen lyase activity;intracellular signal transduction;membrane;integral component of membrane;nucleotide binding;ATP binding;metal ion binding;lyase activity	cellular_component;biological_process;molecular_function	PTHR11920_SF286	ADENYLATE CYCLASE TYPE 4 EC_4.6.1.1 ATP PYROPHOSPHATE LYASE 4 ADENYLATE CYCLASE TYPE IV ADENYLYL CYCLASE 4	GO:0007165;GO:0016829;GO:0009058;GO:0044281;GO:0034641;GO:0005575;GO:0005886;GO:0003674;GO:0043167	signal transduction;lyase activity;biosynthetic process;small molecule metabolic process;cellular nitrogen compound metabolic process;cellular_component;plasma membrane;molecular_function;ion binding	00230+4.6.1.1
ENSONIG00000000308	glutamate metabotropic receptor 7	GRM7	59.5394	57.9382	1.02818	0.0400978	5.87142	0.100702	0.750989	0.999804	1	protein_coding				GO:0016021;GO:0007186;GO:0004930;GO:0016020;GO:0007165;GO:0005886	integral component of membrane;G protein-coupled receptor signaling pathway;G protein-coupled receptor activity;membrane;signal transduction;plasma membrane	cellular_component;biological_process;molecular_function	PTHR24060	METABOTROPIC GLUTAMATE RECEPTOR PRECURSOR	GO:0003674;GO:0007165;GO:0005575;GO:0005886	molecular_function;signal transduction;cellular_component;plasma membrane
ENSONIG00000000309	KH and NYN domain containing	khnyn	5.7939	6.3582	-1.09786	-0.134692	2.65898	0.549208	0.458641	0.999804	1	protein_coding	ZDB-GENE-141215-64			GO:0003723	RNA binding	molecular_function	PTHR12876_SF2	NYNRIN NYN DOMAIN AND RETROVIRAL INTEGRASE CATALYTIC DOMAIN CONTAINING	GO:0003674;GO:0003723	molecular_function;RNA binding
ENSONIG00000000310	RAS protein activator like 2	rasal2	13.1849	12.8096	1.03113	0.0442306	3.69993	0.0972333	0.755175	0.999804	2	protein_coding	ZDB-GENE-070912-180			GO:0043087;GO:0007165;GO:0005096;GO:0043547	regulation of GTPase activity;signal transduction;GTPase activator activity;positive regulation of GTPase activity	biological_process;molecular_function	PTHR10194_SF52	RAS GTPASE ACTIVATING NGAP RAS ACTIVATOR 2	GO:0007165;GO:0008150;GO:0003674;GO:0030234	signal transduction;biological_process;molecular_function;enzyme regulator activity
ENSONIG00000000311	receptor-interacting serine/threonine-protein kinase 3	ripk3	9.55505	8.9772	1.06003	0.0840986	3.24861	0.116699	0.732643	0.999804	2	protein_coding	ZDB-GENE-071115-4	100694194	I3IUV2;I3IUV3	GO:0006468;GO:0004672;GO:0005524	protein phosphorylation;protein kinase activity;ATP binding	biological_process;molecular_function	PTHR23257_SF346	RECEPTOR INTERACTING SERINE/THREONINE KINASE 3 EC_2.7.11.1 RIP KINASE 3 RECEPTOR INTERACTING 3 RIP 3	GO:0003674;GO:0043167;GO:0016301;GO:0006464	molecular_function;ion binding;kinase activity;cellular protein modification process
ENSONIG00000000312	cerebellin-1	si:dkeyp-74b6.2	35.8287	37.0339	-1.03521	-0.0499235	5.19614	0.145562	0.702813	0.999804	1	protein_coding	ZDB-GENE-160113-86	100694459	I3IUV4	GO:0005515	protein binding	molecular_function	PTHR22923_SF52	CEREBELLIN 1	GO:0003674	molecular_function
ENSONIG00000000315			33.7995	31.009	1.09308	0.128398	5.0617	1.35638	0.244165	0.999804	1	protein_coding				GO:0005515	protein binding	molecular_function	PTHR23119_SF25	DISKS LARGE HOMOLOG 1 SYNAPSE ASSOCIATED 97A SAP 97A SAP97A	GO:0003674	molecular_function	00230+2.7.4.8
ENSONIG00000000323			0.972278	0.939345	1.01488	0.0213146	0.113025	0.00270857	0.958494	0.999804	1	protein_coding				GO:0005515	protein binding	molecular_function	PTHR25480_SF184	UNKNOWN	GO:0003674	molecular_function
ENSONIG00000000332			2.80181	1.694	1.64229	0.715705	1.22439	1.85487	0.173218	0.999804	1	protein_coding							PTHR24106_SF58	AMBIGUOUS
ENSONIG00000000334	polymerase (DNA directed), eta	polh	16.0601	17.7532	-1.1013	-0.139202	4.0358	1.02956	0.310261	0.999804	1	protein_coding	ZDB-GENE-060421-4949			GO:0003684;GO:0006281	damaged DNA binding;DNA repair	molecular_function;biological_process	PTHR11076_SF11	DNA POLYMERASE ETA EC_2.7.7.7 RAD30 HOMOLOG A XERODERMA PIGMENTOSUM VARIANT TYPE	GO:0006259;GO:0006950;GO:0034641;GO:0003674;GO:0003677	DNA metabolic process;response to stress;cellular nitrogen compound metabolic process;molecular_function;DNA binding	00240+2.7.7.7;00230+2.7.7.7
ENSONIG00000000336			6.01475	6.05697	-1.00325	-0.00468601	2.5816	0.000266936	0.986965	0.999804	1	protein_coding				GO:0005515;GO:0000166;GO:0005524	protein binding;nucleotide binding;ATP binding	molecular_function	PTHR24106_SF58	AMBIGUOUS	GO:0003674;GO:0043167	molecular_function;ion binding
ENSONIG00000000337			6.96257	6.68951	1.04392	0.0620053	2.75274	0.0880854	0.766625	0.999804	1	protein_coding				GO:0003924;GO:0005525	GTPase activity;GTP binding	molecular_function	PTHR23115_SF24	GTP BINDING 2	GO:0003674;GO:0043167;GO:0003924	molecular_function;ion binding;GTPase activity
ENSONIG00000000338			0.759318	0.944824	-1.26773	-0.342243	0.08967	0.232989	0.629316	0.999804	2	protein_coding				GO:0005515	protein binding	molecular_function	PTHR24106_SF58	AMBIGUOUS	GO:0003674	molecular_function
ENSONIG00000000341			56.8604	58.4394	-1.02825	-0.0401976	5.94077	0.00986183	0.920895	0.999804	1	protein_coding				GO:0005515	protein binding	molecular_function	PTHR24106_SF58	AMBIGUOUS	GO:0003674	molecular_function
ENSONIG00000000344	coiled-coil domain containing 130	ccdc130	26.5719	22.8219	1.15932	0.213276	4.60408	2.4645	0.116445	0.999804	2	protein_coding	ZDB-GENE-040912-36	100709274	I3IUZ3;I3IUZ2				PTHR12111	COILED COIL DOMAIN CONTAINING
ENSONIG00000000347	proprotein convertase subtilisin/kexin type 2	pcsk2	541.688	511.39	1.05936	0.083194	9.05388	1.15017	0.283514	0.999804	1	protein_coding	ZDB-GENE-090608-1	100534405	I3IUZ6	GO:0004252;GO:0006508;GO:0008233;GO:0016787;GO:0008236	serine-type endopeptidase activity;proteolysis;peptidase activity;hydrolase activity;serine-type peptidase activity	molecular_function;biological_process	PTHR10795_SF11	NEUROENDOCRINE CONVERTASE 2 PRECURSOR NEC 2 EC_3.4.21.94 KEX2 ENDOPROTEASE 2 PROHORMONE CONVERTASE 2 PROPROTEIN CONVERTASE 2 PC2	GO:0008233	peptidase activity
ENSONIG00000000348	glutamate receptor 1		52.9002	52.3418	1.00941	0.0135089	5.67947	0.016736	0.897067	0.999804	2	protein_coding		100694014		GO:0004970;GO:0016020;GO:0016021;GO:0006811;GO:0005886;GO:0030054;GO:0035235;GO:0045202;GO:0045211	ionotropic glutamate receptor activity;membrane;integral component of membrane;ion transport;plasma membrane;cell junction;ionotropic glutamate receptor signaling pathway;synapse;postsynaptic membrane	molecular_function;cellular_component;biological_process	PTHR18966_SF157	GLUTAMATE RECEPTOR 1 PRECURSOR GLUR 1 AMPA SELECTIVE GLUTAMATE RECEPTOR 1 GLUR A GLUR K1 GLUTAMATE RECEPTOR IONOTROPIC AMPA 1 GLUA1	GO:0005575;GO:0006810;GO:0005886;GO:0007165	cellular_component;transport;plasma membrane;signal transduction
ENSONIG00000000349	WD repeat domain 83	wdr83	14.9052	14.2926	1.04683	0.0660316	3.95569	0.126996	0.721567	0.999804	1	protein_coding	ZDB-GENE-040718-126	100699151	I3IUZ9	GO:0005515	protein binding	molecular_function	PTHR22842	WD REPEAT DOMAIN CONTAINING 83 MITOGEN ACTIVATED KINASE ORGANIZER 1 MAPK ORGANIZER 1	GO:0003674	molecular_function
ENSONIG00000000350	WD repeat domain 83 opposite strand	wdr83os	31.2122	31.6894	-1.0135	-0.0193426	4.95566	0.0203646	0.886523	0.999804	1	protein_coding	ZDB-GENE-040426-1674	100699418	I3IV00	GO:0016020;GO:0016021	membrane;integral component of membrane	cellular_component	PTHR13193	ASTERIX	GO:0005575	cellular_component
ENSONIG00000000351	calcium channel, voltage-dependent, P/Q type, alpha 1A subunit, b	cacna1ab	77.2319	84.5964	-1.09593	-0.132157	6.25958	0.751008	0.386157	0.999804	2	protein_coding	ZDB-GENE-090514-3			GO:0005891;GO:0070588;GO:0005245;GO:0005216;GO:0006811;GO:0055085;GO:0005509;GO:0016020;GO:0016021;GO:0005244;GO:0034765;GO:0005262;GO:0008331;GO:0001966;GO:0006816;GO:0007274;GO:0036269	voltage-gated calcium channel complex;calcium ion transmembrane transport;voltage-gated calcium channel activity;ion channel activity;ion transport;transmembrane transport;calcium ion binding;membrane;integral component of membrane;voltage-gated ion channel activity;regulation of ion transmembrane transport;calcium channel activity;high voltage-gated calcium channel activity;thigmotaxis;calcium i…	cellular_component;biological_process;molecular_function	PTHR10037_SF59	VOLTAGE DEPENDENT P/Q TYPE CALCIUM CHANNEL SUBUNIT ALPHA 1A BRAIN CALCIUM CHANNEL I BI CALCIUM CHANNEL L TYPE ALPHA 1 POLYPEPTIDE 4 VOLTAGE GATED CALCIUM CHANNEL SUBUNIT ALPHA CAV2 1	GO:0005575;GO:0003674;GO:0043167;GO:0006810;GO:0055085;GO:0022857;GO:0032991;GO:0040011;GO:0007267	cellular_component;molecular_function;ion binding;transport;transmembrane transport;transmembrane transporter activity;protein-containing complex;locomotion;cell-cell signaling
ENSONIG00000000352	beaded filament structural protein 1	BFSP1	0.725247	0.632609	1.12203	0.166114	-0.277879	0.0713816	0.789336	0.999804	2	protein_coding		100697310	I3IV03;I3IV04	GO:0005198;GO:0005882	structural molecule activity;intermediate filament	molecular_function;cellular_component	PTHR14069	FILENSIN BEADED FILAMENT STRUCTURAL 1 LENS FIBER CELL BEADED FILAMENT STRUCTURAL CP	GO:0003674;GO:0005198;GO:0005575	molecular_function;structural molecule activity;cellular_component
ENSONIG00000000353	prokineticin receptor 2	prokr1b	7.90462	7.77074	1.02505	0.0356918	2.98381	0.0220474	0.881961	0.999804	1	protein_coding	ZDB-GENE-081113-2	100697573	I3IV05	GO:0016021;GO:0007186;GO:0004930;GO:0016020;GO:0007165;GO:0009416;GO:0030431	integral component of membrane;G protein-coupled receptor signaling pathway;G protein-coupled receptor activity;membrane;signal transduction;response to light stimulus;sleep	cellular_component;biological_process;molecular_function	PTHR24242_SF200	PROKINETICIN RECEPTOR 1	GO:0003674;GO:0007165;GO:0005575	molecular_function;signal transduction;cellular_component
ENSONIG00000000354	pleckstrin	plek	9.90062	9.35612	1.06106	0.0855119	3.36945	0.154114	0.694634	0.999804	1	protein_coding	ZDB-GENE-040426-1506	100694733	I3IV06	GO:0035556	intracellular signal transduction	biological_process	PTHR12092_SF1	PLECKSTRIN	GO:0007165	signal transduction
ENSONIG00000000355	protocadherin-related 15a	pcdh15a	11.2428	11.2497	1.00221	0.00318486	3.50588	0.000272421	0.986831	0.999804	2	protein_coding	ZDB-GENE-030616-3			GO:0007155;GO:0007156;GO:0005886;GO:0005509;GO:0016020;GO:0016021;GO:0006897;GO:0007423;GO:0035315;GO:0050910;GO:0050974;GO:0060271	cell adhesion;homophilic cell adhesion via plasma membrane adhesion molecules;plasma membrane;calcium ion binding;membrane;integral component of membrane;endocytosis;sensory organ development;hair cell differentiation;detection of mechanical stimulus involved in sensory perception of sound;detection of mechanical stimulus involved in sensory perception;cilium assembly	biological_process;cellular_component;molecular_function	PTHR24028_SF11	PROTOCADHERIN 15 PRECURSOR	GO:0005575;GO:0003674;GO:0043167;GO:0005886;GO:0007155;GO:0006810;GO:0016192;GO:0048856;GO:0030154;GO:0050877;GO:0022607	cellular_component;molecular_function;ion binding;plasma membrane;cell adhesion;transport;vesicle-mediated transport;anatomical structure development;cell differentiation;nervous system process;cellular component assembly
ENSONIG00000000357	neutrophil cytosolic factor 1	ncf1	9.81697	7.94308	1.23599	0.305666	3.43968	1.28029	0.257845	0.999804	1	protein_coding	ZDB-GENE-031006-6	100692664	I3IV10	GO:0016175;GO:0035091;GO:0005737;GO:0005515;GO:0045730;GO:0050832;GO:0055114	superoxide-generating NADPH oxidase activity;phosphatidylinositol binding;cytoplasm;protein binding;respiratory burst;defense response to fungus;oxidation-reduction process	molecular_function;cellular_component;biological_process	PTHR15706_SF6	NEUTROPHIL CYTOSOL FACTOR 1 NCF 1.47 KDA NEUTROPHIL OXIDASE FACTOR NCF 47K NEUTROPHIL NADPH OXIDASE FACTOR 1 P47 PHOX	GO:0003674;GO:0005575;GO:0005737;GO:0043167;GO:0008289;GO:0006950	molecular_function;cellular_component;cytoplasm;ion binding;lipid binding;response to stress
ENSONIG00000000358	ST6 beta-galactosamide alpha-2,6-sialyltranferase 1	st6gal1	53.4038	51.8114	1.0325	0.0461465	5.74962	0.193814	0.659761	0.999804	1	protein_coding	ZDB-GENE-060322-3			GO:0006486;GO:0008373;GO:0016020;GO:0016021;GO:0016740;GO:0016757;GO:0005794;GO:0097503	protein glycosylation;sialyltransferase activity;membrane;integral component of membrane;transferase activity;transferase activity, transferring glycosyl groups;Golgi apparatus;sialylation	biological_process;molecular_function;cellular_component	PTHR13713_SF34	BETA GALACTOSIDE ALPHA 2 6 SIALYLTRANSFERASE 1 ALPHA 2 6 ST 1 EC_2.4.99.1 CMP N ACETYLNEURAMINATE BETA GALACTOSAMIDE ALPHA 2 6 SIALYLTRANSFERASE 1 ST6GAL I ST6GALI SIALYLTRANSFERASE 1	GO:0016757;GO:0006464;GO:0005575;GO:0043226;GO:0005794	transferase activity, transferring glycosyl groups;cellular protein modification process;cellular_component;organelle;Golgi apparatus
ENSONIG00000000360	translocase of outer mitochondrial membrane 34	TOMM34	5.60742	8.49803	-1.51721	-0.601425	2.90058	3.80009	0.0512499	0.999804	1	protein_coding				GO:0005515	protein binding	molecular_function	PTHR22904_SF31	MITOCHONDRIAL IMPORT RECEPTOR SUBUNIT TOM34 TRANSLOCASE OF OUTER MEMBRANE 34 KDA SUBUNIT	GO:0003674	molecular_function
ENSONIG00000000363	14-3-3 protein beta/alpha-A	ywhaba	411.216	398.121	1.03305	0.0469098	8.66733	0.12343	0.725344	0.999804	1	protein_coding	ZDB-GENE-030131-6583	100703537	I3IV16	GO:0019904	protein domain specific binding	molecular_function	PTHR18860	UNKNOWN	GO:0003674	molecular_function
ENSONIG00000000364	SRY-box 18	SOX18	1.67024	1.35852	1.19733	0.259818	0.688853	0.282605	0.594999	0.999804	1	protein_coding			I3IV17	GO:0003677;GO:0005634	DNA binding;nucleus	molecular_function;cellular_component	PTHR10270_SF204	TRANSCRIPTION FACTOR SOX SRY SEX DETERMINING REGION Y BOX	GO:0003674;GO:0003677;GO:0005575;GO:0043226;GO:0005634	molecular_function;DNA binding;cellular_component;organelle;nucleus
ENSONIG00000000365	transcription elongation factor A (SII), 2	tcea2	6.75768	6.97775	-1.02896	-0.0411896	2.87152	0.0387432	0.843958	0.999804	1	protein_coding	ZDB-GENE-040426-985			GO:0008270;GO:0006351;GO:0003676;GO:0005634;GO:0006355;GO:0046872	zinc ion binding;transcription, DNA-templated;nucleic acid binding;nucleus;regulation of transcription, DNA-templated;metal ion binding	molecular_function;biological_process;cellular_component	PTHR11477_SF3	TRANSCRIPTION ELONGATION FACTOR A 2 S II T1 TESTIS SPECIFIC S II TRANSCRIPTION ELONGATION FACTOR S II 2 TRANSCRIPTION ELONGATION FACTOR TFIIS L	GO:0005575;GO:0043226;GO:0005634;GO:0003674;GO:0009058;GO:0034641;GO:0043167	cellular_component;organelle;nucleus;molecular_function;biosynthetic process;cellular nitrogen compound metabolic process;ion binding
ENSONIG00000000366	regulating synaptic membrane exocytosis 4	rims4	16.2121	12.9407	1.25669	0.329624	3.91265	4.16084	0.0413689	0.999804	2	protein_coding	ZDB-GENE-110103-1	100703811	I3IV19;I3IV20	GO:0006887;GO:0017137;GO:0016020	exocytosis;Rab GTPase binding;membrane	biological_process;molecular_function;cellular_component	PTHR12157_SF17	REGULATING SYNAPTIC MEMBRANE EXOCYTOSIS 4 RIM4 GAMMA RAB3 INTERACTING MOLECULE 4 RIM 4	GO:0005575;GO:0006810;GO:0016192	cellular_component;transport;vesicle-mediated transport
ENSONIG00000000369	cGMP-dependent protein kinase 1	prkg1a	49.3171	48.9658	1.00553	0.00795251	5.56495	0.00331433	0.954091	0.999804	2	protein_coding	ZDB-GENE-040426-1308	100694992	I3IV24;I3IV25	GO:0004692;GO:0006468;GO:0004672;GO:0005524;GO:0016740;GO:0000166;GO:0004674;GO:0016301;GO:0016310;GO:0030553	cGMP-dependent protein kinase activity;protein phosphorylation;protein kinase activity;ATP binding;transferase activity;nucleotide binding;protein serine/threonine kinase activity;kinase activity;phosphorylation;cGMP binding	molecular_function;biological_process	PTHR24353_SF61	CGMP DEPENDENT KINASE 1 CGK 1 CGK1 EC_2.7.11.12 CGMP DEPENDENT KINASE I CGKI	GO:0003674;GO:0043167;GO:0016301;GO:0006464	molecular_function;ion binding;kinase activity;cellular protein modification process
ENSONIG00000000370	U6 snRNA-associated Sm-like protein LSm3	lsm3	12.1221	12.713	-1.04575	-0.0645386	3.71009	0.202481	0.652726	0.999804	1	protein_coding	ZDB-GENE-161207-2	100705055;100704258	I3KZX4	GO:0000956;GO:0000398;GO:0003723;GO:0005634;GO:0006397;GO:0008380;GO:0005681;GO:0000932;GO:1990726;GO:0005688;GO:0046540;GO:0033962;GO:0071013	nuclear-transcribed mRNA catabolic process;mRNA splicing, via spliceosome;RNA binding;nucleus;mRNA processing;RNA splicing;spliceosomal complex;P-body;Lsm1-7-Pat1 complex;U6 snRNP;U4/U6 x U5 tri-snRNP complex;cytoplasmic mRNA processing body assembly;catalytic step 2 spliceosome	biological_process;molecular_function;cellular_component	PTHR13110_SF0	U6 SNRNA ASSOCIATED SM LSM3	GO:0003674;GO:0003723;GO:0034641;GO:0006397;GO:0009056;GO:0034655;GO:0005575;GO:0043226;GO:0005634;GO:0032991;GO:0022607;GO:0022618;GO:0065003	molecular_function;RNA binding;cellular nitrogen compound metabolic process;mRNA processing;catabolic process;nucleobase-containing compound catabolic process;cellular_component;organelle;nucleus;protein-containing complex;cellular component assembly;ribonucleoprotein complex assembly;protein-containing complex assembly
ENSONIG00000000371	solute carrier family 6 member 6	SLC6A6 (1 of many)	150.467	134.422	1.11953	0.162888	7.14798	0.898496	0.343185	0.999804	1	protein_coding				GO:0005328;GO:0006836;GO:0005369;GO:0005887;GO:0016021;GO:0016020;GO:0055085;GO:0015293	neurotransmitter:sodium symporter activity;neurotransmitter transport;taurine:sodium symporter activity;integral component of plasma membrane;integral component of membrane;membrane;transmembrane transport;symporter activity	molecular_function;biological_process;cellular_component	PTHR11616_SF116	SODIUM AND CHLORIDE DEPENDENT TAURINE TRANSPORTER SOLUTE CARRIER FAMILY 6 MEMBER 6	GO:0005575;GO:0022857;GO:0003674;GO:0006810;GO:0055085	cellular_component;transmembrane transporter activity;molecular_function;transport;transmembrane transport
ENSONIG00000000372	regulator of G protein signaling 19	rgs19	3.78757	3.69217	1.02107	0.0300854	1.87349	0.0176136	0.894418	0.999804	1	protein_coding	ZDB-GENE-080723-72						PTHR10845_SF145	REGULATOR OF G SIGNALING 19 RGS19 G ALPHA INTERACTING GAIP
ENSONIG00000000373	glutamate receptor interacting protein 2b	grip2b	16.5482	15.793	1.05064	0.0712673	3.93405	0.0887138	0.765819	0.999804	1	protein_coding	ZDB-GENE-070705-172			GO:0030159;GO:0005515	receptor signaling complex scaffold activity;protein binding	molecular_function	PTHR10316_SF42	GLUTAMATE RECEPTOR INTERACTING 2	GO:0003674;GO:0005198	molecular_function;structural molecule activity
ENSONIG00000000375			5.40074	6.42578	-1.19556	-0.257688	2.56835	1.31715	0.251103	0.999804	1	protein_coding							TF620779	UNCHARACTERIZED
ENSONIG00000000376	papilin a, proteoglycan-like sulfated glycoprotein	paplna	4.96398	5.53712	-1.11582	-0.158103	2.43682	0.259394	0.610537	0.999804	3	protein_coding	ZDB-GENE-070815-4			GO:0008233;GO:0004867;GO:0010951;GO:0006508	peptidase activity;serine-type endopeptidase inhibitor activity;negative regulation of endopeptidase activity;proteolysis	molecular_function;biological_process	PTHR13723_SF20	PAPILIN PRECURSOR	GO:0003674;GO:0030234;GO:0008233	molecular_function;enzyme regulator activity;peptidase activity
ENSONIG00000000377	zgc:91976	zgc:91976	61.2466	64.7696	-1.05755	-0.0807192	5.91541	0.600123	0.438531	0.999804	1	protein_coding	ZDB-GENE-041114-201			GO:0005515;GO:0016020;GO:0016021	protein binding;membrane;integral component of membrane	molecular_function;cellular_component	PTHR21290_SF28	PHOSPHATIDYLCHOLINE:CERAMIDE CHOLINEPHOSPHOTRANSFERASE 1 EC_2.7.8.27 MOB SPHINGOMYELIN SYNTHASE 1 TRANSMEMBRANE 23	GO:0003674;GO:0005575	molecular_function;cellular_component
ENSONIG00000000378	presenilin-1	psen1	41.8995	42.8727	-1.0211	-0.0301242	5.46002	0.0742242	0.785283	0.999804	1	protein_coding	ZDB-GENE-991119-4	100697238	I3IV36	GO:0016485;GO:0004190;GO:0016021;GO:0016020;GO:0005794;GO:0008233;GO:0016787;GO:0006508;GO:0000139;GO:0007219;GO:0005783;GO:0005789	protein processing;aspartic-type endopeptidase activity;integral component of membrane;membrane;Golgi apparatus;peptidase activity;hydrolase activity;proteolysis;Golgi membrane;Notch signaling pathway;endoplasmic reticulum;endoplasmic reticulum membrane	biological_process;molecular_function;cellular_component	PTHR10202_SF7	PRESENILIN 1 PS 1 EC_3.4.23.- [CONTAINS PRESENILIN 1 NTF SUBUNIT; PRESENILIN 1 CTF SUBUNIT; PRESENILIN 1 CTF12 PS1 CTF12 ]	GO:0005575;GO:0008233;GO:0051604;GO:0043226;GO:0005794;GO:0007165;GO:0005783	cellular_component;peptidase activity;protein maturation;organelle;Golgi apparatus;signal transduction;endoplasmic reticulum
ENSONIG00000000379	multiple inositol-polyphosphate phosphatase 1a	minpp1a	49.2576	47.4831	1.0382	0.0540901	5.55934	0.282518	0.595056	0.999804	3	protein_coding	ZDB-GENE-060929-1194			GO:0016791;GO:0016311	phosphatase activity;dephosphorylation	molecular_function;biological_process	PTHR20963	PRECURSOR	GO:0016791	phosphatase activity
ENSONIG00000000380	gamma-glutamyl hydrolase	zgc:171566	59.0617	63.1918	-1.07085	-0.0987617	5.93051	0.207052	0.649088	0.999804	1	protein_coding	ZDB-GENE-050309-193	100692082	I3IV40	GO:0008242;GO:0016787;GO:0006508;GO:0034722	omega peptidase activity;hydrolase activity;proteolysis;gamma-glutamyl-peptidase activity	molecular_function;biological_process	PTHR11315	GAMMA GLUTAMYL HYDROLASE PRECURSOR EC_3.4.19.9 CONJUGASE GH GAMMA GLU X CARBOXYPEPTIDASE			00790+3.4.19.9
ENSONIG00000000381	bifunctional 3'-phosphoadenosine 5'-phosphosulfate synthase 2	papss2a	6.19703	6.38636	-1.03499	-0.0496119	2.62566	0.0486657	0.825402	0.999804	1	protein_coding	ZDB-GENE-061110-85	100695448	I3IV41	GO:0004781;GO:0000103;GO:0004020;GO:0005524;GO:0016310	sulfate adenylyltransferase (ATP) activity;sulfate assimilation;adenylylsulfate kinase activity;ATP binding;phosphorylation	molecular_function;biological_process	PTHR11055	SULFATE ADENYLYLTRANSFERASE EC_2.7.7.4 ATP SULFURYLASE SULFATE ADENYLATE TRANSFERASE SAT	GO:0003674;GO:0043167;GO:0016301;GO:0006790;GO:0016779	molecular_function;ion binding;kinase activity;sulfur compound metabolic process;nucleotidyltransferase activity	00230+2.7.1.25;00920+2.7.1.25;00261+2.7.7.4;00230+2.7.7.4;00450+2.7.7.4;00920+2.7.7.4
ENSONIG00000000382	enhancer of rudimentary homolog	ERH	2.6117	2.92673	-1.12657	-0.171936	1.58274	0.24087	0.623579	0.999804	1	protein_coding		100697503	I3IV42	GO:0045747;GO:0006221;GO:0007049	positive regulation of Notch signaling pathway;pyrimidine nucleotide biosynthetic process;cell cycle	biological_process	PTHR12373	ENHANCER OF RUDIMENTARY	GO:0009058;GO:0044281;GO:0034641;GO:0007049	biosynthetic process;small molecule metabolic process;cellular nitrogen compound metabolic process;cell cycle
ENSONIG00000000383	si:ch211-168d23.3	si:ch211-168d23.3	19.8445	18.0439	1.10433	0.143168	4.22563	0.780958	0.376848	0.999804	1	protein_coding	ZDB-GENE-131127-572						PTHR15572_SF1	BRD4 INTERACTING CHROMATIN REMODELING COMPLEX ASSOCIATED GLIOMA TUMOR SUPPRESSOR CANDIDATE REGION GENE 1
ENSONIG00000000384	receptor-type tyrosine-protein phosphatase T	ptprt	181.602	191.264	-1.05301	-0.0745144	7.54139	0.376026	0.539738	0.999804	2	protein_coding	ZDB-GENE-101028-4	100692353		GO:0016791;GO:0016311;GO:0006470;GO:0004725;GO:0016020;GO:0005515;GO:0016021;GO:0016787;GO:0004721;GO:0035335	phosphatase activity;dephosphorylation;protein dephosphorylation;protein tyrosine phosphatase activity;membrane;protein binding;integral component of membrane;hydrolase activity;phosphoprotein phosphatase activity;peptidyl-tyrosine dephosphorylation	molecular_function;biological_process;cellular_component	PTHR19134_SF208	RECEPTOR TYPE TYROSINE PHOSPHATASE T PRECURSOR R PTP T EC_3.1.3.48 RECEPTOR TYPE TYROSINE PHOSPHATASE RHO RPTP RHO	GO:0003674;GO:0005575;GO:0016791;GO:0006464	molecular_function;cellular_component;phosphatase activity;cellular protein modification process
ENSONIG00000000385	exonuclease 3'-5' domain containing 2	exd2	22.2615	21.7784	1.02216	0.0316258	4.53722	0.0679782	0.794304	0.999804	1	protein_coding	ZDB-GENE-030131-6387	100697775	I3IV46	GO:0006139;GO:0008408;GO:0003676;GO:0016020;GO:0016021;GO:0090305	nucleobase-containing compound metabolic process;3'-5' exonuclease activity;nucleic acid binding;membrane;integral component of membrane;nucleic acid phosphodiester bond hydrolysis	biological_process;molecular_function;cellular_component	PTHR13620_SF0	EXONUCLEASE 3' 5' DOMAIN CONTAINING 2 EC_3.1.11.1 EXONUCLEASE 3' 5' DOMAIN CONTAINING 2	GO:0003674;GO:0004518;GO:0034641;GO:0005575	molecular_function;nuclease activity;cellular nitrogen compound metabolic process;cellular_component
ENSONIG00000000386	phosphatidylinositol 3,4,5-trisphosphate 3-phosphatase and dual-specificity protein phosphatase PTEN	ptena	89.4175	86.0899	1.03887	0.0550168	6.46594	0.363423	0.546611	0.999804	2	protein_coding	ZDB-GENE-030131-3776	100695712	I3IV48;I3IV47	GO:0046856;GO:0046855;GO:0008285;GO:0051800;GO:0051717;GO:0016314;GO:0008138;GO:0016311;GO:0004725;GO:0005634;GO:0005737;GO:0016787;GO:0006629;GO:0004721;GO:0035335;GO:0004438;GO:0042577;GO:0001568;GO:0002275;GO:0006470;GO:0007399;GO:0016525;GO:0030097;GO:0031103;GO:0031174;GO:0051896;GO:0061515;GO:0016605	phosphatidylinositol dephosphorylation;inositol phosphate dephosphorylation;negative regulation of cell population proliferation;phosphatidylinositol-3,4-bisphosphate 3-phosphatase activity;inositol-1,3,4,5-tetrakisphosphate 3-phosphatase activity;phosphatidylinositol-3,4,5-trisphosphate 3-phosphatase activity;protein tyrosine/serine/threonine phosphatase activity;dephosphorylation;protein tyrosi…	biological_process;molecular_function;cellular_component	PTHR12305_SF32	PHOSPHATIDYLINOSITOL 3 4 5 TRISPHOSPHATE 3 PHOSPHATASE AND DUAL SPECIFICITY PHOSPHATASE PTEN EC_3.1.3.16 EC_3.1.3.- 48 EC_3.1.-.- 3 67 MUTATED IN MULTIPLE ADVANCED CANCERS 1 PHOSPHATASE AND TENSIN HOMOLOG	GO:0016791;GO:0044281;GO:0005975;GO:0009056;GO:0006629;GO:0005575;GO:0043226;GO:0005634;GO:0005737;GO:0006464;GO:0048856;GO:0002376;GO:0006950	phosphatase activity;small molecule metabolic process;carbohydrate metabolic process;catabolic process;lipid metabolic process;cellular_component;organelle;nucleus;cytoplasm;cellular protein modification process;anatomical structure development;immune system process;response to stress	04660+3.1.3.16;04658+3.1.3.16;00562+3.1.3.67;04070+3.1.3.67
ENSONIG00000000387	NUMB, endocytic adaptor protein	numb	13.4822	16.3447	-1.20857	-0.273303	3.90149	2.93474	0.0866928	0.999804	1	protein_coding	ZDB-GENE-060422-1	100698038	I3IV49	GO:0005515;GO:0060319;GO:0005737;GO:0005886;GO:0016323	protein binding;primitive erythrocyte differentiation;cytoplasm;plasma membrane;basolateral plasma membrane	molecular_function;biological_process;cellular_component	PTHR11232_SF33	NUMB HOMOLOG	GO:0003674;GO:0002376;GO:0042592;GO:0030154;GO:0005575;GO:0005737;GO:0005886	molecular_function;immune system process;homeostatic process;cell differentiation;cellular_component;cytoplasm;plasma membrane
ENSONIG00000000388	tumor necrosis factor receptor superfamily member 6		2.30118	2.35168	-1.02738	-0.038963	1.42846	0.0137964	0.906497	0.999804	2	protein_coding		102083126	I3IV51;I3IV50	GO:0004888;GO:0006955;GO:0007165;GO:0006915;GO:0016020;GO:0005515;GO:0016021;GO:0005623	transmembrane signaling receptor activity;immune response;signal transduction;apoptotic process;membrane;protein binding;integral component of membrane;cell	molecular_function;biological_process;cellular_component	PTHR23097_SF93	TUMOR NECROSIS FACTOR RECEPTOR SUPERFAMILY MEMBER 6 PRECURSOR APO 1 ANTIGEN APOPTOSIS MEDIATING SURFACE ANTIGEN FAS FASLG RECEPTOR CD95 ANTIGEN	GO:0003674;GO:0005575;GO:0008219;GO:0007165;GO:0002376;GO:0005623	molecular_function;cellular_component;cell death;signal transduction;immune system process;cell
ENSONIG00000000389	polypeptide N-acetylgalactosaminyltransferase 16	galnt16	303.81	299.878	1.01325	0.0189866	8.27368	0.0422307	0.837181	0.999804	2	protein_coding	ZDB-GENE-131120-189	100698305	I3IV52;I3IV53	GO:0016020;GO:0016021;GO:0016740;GO:0016757;GO:0030246;GO:0006486;GO:0005794;GO:0000139	membrane;integral component of membrane;transferase activity;transferase activity, transferring glycosyl groups;carbohydrate binding;protein glycosylation;Golgi apparatus;Golgi membrane	cellular_component;molecular_function;biological_process	PTHR11675_SF3	POLYPEPTIDE N ACETYLGALACTOSAMINYLTRANSFERASE 16 EC_2.4.1.41 POLYPEPTIDE GALNAC TRANSFERASE 16 GALNAC T16 POLYPEPTIDE GALNAC TRANSFERASE 1 GALNAC T 1 PP GANTASE 1 POLYPEPTIDE N ACETYLGALACTOSAMINYLTRANSFERASE 1 UDP ACETYLGALACTOSAMINYLTRANSFERASE 1 UDP GALNAC:POLYPEPTIDE N ACETYLGALACTOSAMINYLTRANSFERASE 1	GO:0005575;GO:0016757;GO:0003674;GO:0006464;GO:0043226;GO:0005794	cellular_component;transferase activity, transferring glycosyl groups;molecular_function;cellular protein modification process;organelle;Golgi apparatus
ENSONIG00000000390	glutathione S-transferase omega 1	GSTO1 (1 of many)	1.86102	2.1054	-1.12522	-0.170207	0.991208	0.32735	0.567223	0.999804	1	protein_coding				GO:0004364;GO:0005737;GO:0005515	glutathione transferase activity;cytoplasm;protein binding	molecular_function;cellular_component	PTHR11260_SF132	GLUTATHIONE S TRANSFERASE OMEGA 1 GSTO 1 EC_2.5.1.18 GLUTATHIONE S TRANSFERASE OMEGA 1 1 GSTO 1 1 GLUTATHIONE DEPENDENT DEHYDROASCORBATE REDUCTASE EC_1.8.5.- 1 MONOMETHYLARSONIC ACID REDUCTASE MMA V REDUCTASE EC_1.20.-.- 4 2 S PHENACYL GLUTATHIONE REDUCTASE SPG R	GO:0003674;GO:0005575;GO:0005737;GO:0016765	molecular_function;cellular_component;cytoplasm;transferase activity, transferring alkyl or aryl (other than methyl) groups	00980+2.5.1.18;00983+2.5.1.18;00982+2.5.1.18;00053+1.8.5.1;00480+2.5.1.18+1.8.5.1
ENSONIG00000000391	glutathione S-transferase omega-1	GSTO1 (1 of many)	61.3264	57.9148	1.05937	0.083203	5.93078	0.502919	0.47822	0.999804	1	protein_coding		100696412	I3IV55	GO:0004364;GO:0005737;GO:0005515	glutathione transferase activity;cytoplasm;protein binding	molecular_function;cellular_component	PTHR11260_SF132	GLUTATHIONE S TRANSFERASE OMEGA 1 GSTO 1 EC_2.5.1.18 GLUTATHIONE S TRANSFERASE OMEGA 1 1 GSTO 1 1 GLUTATHIONE DEPENDENT DEHYDROASCORBATE REDUCTASE EC_1.8.5.- 1 MONOMETHYLARSONIC ACID REDUCTASE MMA V REDUCTASE EC_1.20.-.- 4 2 S PHENACYL GLUTATHIONE REDUCTASE SPG R	GO:0003674;GO:0005575;GO:0005737;GO:0016765	molecular_function;cellular_component;cytoplasm;transferase activity, transferring alkyl or aryl (other than methyl) groups	00980+2.5.1.18;00983+2.5.1.18;00982+2.5.1.18;00053+1.8.5.1;00480+2.5.1.18+1.8.5.1
ENSONIG00000000393	chromodomain helicase DNA binding protein 6	chd6	66.6198	59.9564	1.11125	0.152181	5.9024	0.735105	0.391233	0.999804	1	protein_coding	ZDB-GENE-130530-559			GO:0016817;GO:0005524;GO:0005515;GO:0005634	hydrolase activity, acting on acid anhydrides;ATP binding;protein binding;nucleus	molecular_function;cellular_component	PTHR10799_SF589	CHROMODOMAIN HELICASE DNA BINDING 6 CHD 6 EC_3.6.4.12 ATP DEPENDENT HELICASE CHD6	GO:0003674;GO:0043167;GO:0005575;GO:0043226;GO:0005634	molecular_function;ion binding;cellular_component;organelle;nucleus
ENSONIG00000000394	syntaxin 10	stx10	12.0908	12.0989	-1.00262	-0.00377364	3.58863	0.000454766	0.982986	0.999804	1	protein_coding	ZDB-GENE-041111-53			GO:0048193;GO:0016192;GO:0016020;GO:0016021	Golgi vesicle transport;vesicle-mediated transport;membrane;integral component of membrane	biological_process;cellular_component	PTHR12380_SF43	SYNTAXIN 10	GO:0005575;GO:0006810;GO:0016192	cellular_component;transport;vesicle-mediated transport
ENSONIG00000000395	cilia and flagella associated protein 43	cfap43	12.0058	16.4174	-1.36598	-0.449933	3.7479	4.23345	0.0396347	0.999804	2	protein_coding	ZDB-GENE-080815-3			GO:0005515	protein binding	molecular_function	PTHR14885	CILIA AND FLAGELLA ASSOCIATED 43	GO:0003674	molecular_function
ENSONIG00000000396	SWI5 dependent homologous recombination repair protein 1	sfr1	2.58973	3.15362	-1.22315	-0.290601	1.65604	0.912473	0.339459	0.999804	1	protein_coding	ZDB-GENE-070410-27	100699715	I3IV61				TF332725	SWI5 DEPENDENT RECOMBINATION DNA REPAIR 1 HOMOLOG MEIOSIS 5 HOMOLOG
ENSONIG00000000397			27.1863	31.845	-1.17117	-0.22795	4.84304	1.92905	0.164863	0.999804	1	protein_coding				GO:0016020;GO:0016021	membrane;integral component of membrane	cellular_component	PTHR24023_SF437	UNKNOWN	GO:0005575	cellular_component
ENSONIG00000000398	VPS39, HOPS complex subunit	vps39	33.1455	32.2375	1.02733	0.0388961	5.05546	0.10843	0.741939	0.999804	1	protein_coding	ZDB-GENE-080530-2	100698565	I3IV63	GO:0016192;GO:0006886;GO:0005515;GO:0005623;GO:0001654;GO:0048066	vesicle-mediated transport;intracellular protein transport;protein binding;cell;eye development;developmental pigmentation	biological_process;molecular_function;cellular_component	PTHR12894	TRANSFORMING GROWTH FACTOR BETA RECEPTOR ASSOCIATED 1 TGF BETA RECEPTOR ASSOCIATED 1	GO:0003674;GO:0006810;GO:0016192;GO:0005575;GO:0005623;GO:0048856;GO:0043473	molecular_function;transport;vesicle-mediated transport;cellular_component;cell;anatomical structure development;pigmentation
ENSONIG00000000399	nucleus accumbens associated 1, BEN and BTB (POZ) domain containing b	nacc1b	7.72581	8.68091	-1.11698	-0.159597	2.96058	0.368964	0.54357	0.999804	1	protein_coding	ZDB-GENE-121212-1			GO:0005515	protein binding	molecular_function	PTHR23228_SF56	NUCLEUS ACCUMBENS ASSOCIATED 1 NAC 1 BTB/POZ DOMAIN CONTAINING 14B	GO:0003674	molecular_function
ENSONIG00000000400	tRNA methyltransferase 1	trmt1	17.5864	17.7416	-1.00597	-0.00858899	4.17855	0.00274591	0.958209	0.999804	2	protein_coding	ZDB-GENE-060810-40	100710345	I3IV65;I3IV66	GO:0008033;GO:0004809;GO:0003723;GO:0046872;GO:0016740;GO:0008168;GO:0032259;GO:0000049;GO:0030488	tRNA processing;tRNA (guanine-N2-)-methyltransferase activity;RNA binding;metal ion binding;transferase activity;methyltransferase activity;methylation;tRNA binding;tRNA methylation	biological_process;molecular_function	PTHR10631	TRNA GUANINE 26 N 2 DIMETHYLTRANSFERASE EC_2.1.1.216 TRNA 2 2 DIMETHYLGUANOSINE 26 METHYLTRANSFERASE TRNA GUANINE 26 N 2 N 2 METHYLTRANSFERASE TRNA M 2 2 G26 DIMETHYLTRANSFERASE	GO:0003674;GO:0043167;GO:0003723;GO:0008168;GO:0034641;GO:0006399	molecular_function;ion binding;RNA binding;methyltransferase activity;cellular nitrogen compound metabolic process;tRNA metabolic process
ENSONIG00000000401	RIPOR family member 3	ripor3	2.65536	2.41958	1.09388	0.12945	1.45353	0.136854	0.711429	0.999804	1	protein_coding	ZDB-GENE-050220-13						PTHR15829	RHO FAMILY INTERACTING CELL POLARIZATION REGULATOR
ENSONIG00000000402	STE20 like kinase	slka	79.4046	83.5314	-1.05319	-0.0747672	6.33493	0.600945	0.438218	0.999804	2	protein_coding	ZDB-GENE-050411-66	100699980	I3IV68;I3IV69	GO:0004674;GO:0006468;GO:0004672;GO:0005524	protein serine/threonine kinase activity;protein phosphorylation;protein kinase activity;ATP binding	molecular_function;biological_process	PTHR24361_SF53	STE20 SERINE/THREONINE KINASE STE20 KINASE EC_2.7.11.1 STE20 RELATED SERINE/THREONINE KINASE STE20 RELATED KINASE	GO:0003674;GO:0043167;GO:0016301;GO:0006464	molecular_function;ion binding;kinase activity;cellular protein modification process	04151+2.7.11.1;04150+2.7.11.1;05165+2.7.11.1;04926+2.7.11.1;04714+2.7.11.1;05170+2.7.11.1;05163+2.7.11.1
ENSONIG00000000403	glucosidase, alpha; neutral C	ganc	3.85228	2.51345	1.54567	0.628231	1.75058	4.04013	0.0444305	0.999804	3	protein_coding	ZDB-GENE-130530-754			GO:0030246;GO:0004553;GO:0005975;GO:0003824;GO:0016787;GO:0016798;GO:0008152;GO:0045214;GO:0005622;GO:0006508;GO:0004198;GO:0005509;GO:0008233;GO:0008234	carbohydrate binding;hydrolase activity, hydrolyzing O-glycosyl compounds;carbohydrate metabolic process;catalytic activity;hydrolase activity;hydrolase activity, acting on glycosyl bonds;metabolic process;sarcomere organization;intracellular;proteolysis;calcium-dependent cysteine-type endopeptidase activity;calcium ion binding;peptidase activity;cysteine-type peptidase activity	molecular_function;biological_process;cellular_component	PTHR22762_SF60;PTHR10183_SF49	NEUTRAL ALPHA GLUCOSIDASE C EC_3.2.1.20;CALPAIN 3 EC_3.4.22.54 CALCIUM ACTIVATED NEUTRAL PROTEINASE 3 CANP 3 CALPAIN L3 CALPAIN P94 MUSCLE SPECIFIC CALCIUM ACTIVATED NEUTRAL PROTEASE 3 NEW CALPAIN 1 NCL 1	GO:0003674;GO:0005975;GO:0016798;GO:0008150;GO:0043167;GO:0005575;GO:0005622;GO:0007010;GO:0022607;GO:0048856;GO:0048646;GO:0008233	molecular_function;carbohydrate metabolic process;hydrolase activity, acting on glycosyl bonds;biological_process;ion binding;cellular_component;intracellular;cytoskeleton organization;cellular component assembly;anatomical structure development;anatomical structure formation involved in morphogenesis;peptidase activity
ENSONIG00000000404	minichromosome maintenance complex component 2	mcm2	3.55311	4.62233	-1.29945	-0.3779	2.13915	1.81054	0.178444	0.999804	1	protein_coding	ZDB-GENE-020419-24	100693703	I3IV73	GO:0042555;GO:1905775;GO:0006260;GO:0006270;GO:0005524;GO:0005634;GO:0003677;GO:0000166;GO:0016787;GO:0003682;GO:0004386;GO:0048538;GO:0060041	MCM complex;negative regulation of DNA helicase activity;DNA replication;DNA replication initiation;ATP binding;nucleus;DNA binding;nucleotide binding;hydrolase activity;chromatin binding;helicase activity;thymus development;retina development in camera-type eye	cellular_component;biological_process;molecular_function	PTHR11630	DNA REPLICATION LICENSING FACTOR EC_3.6.4.12	GO:0003674;GO:0003677;GO:0005575;GO:0043226;GO:0005634;GO:0043167;GO:0006259;GO:0034641;GO:0009058;GO:0032991;GO:0004386;GO:0048856	molecular_function;DNA binding;cellular_component;organelle;nucleus;ion binding;DNA metabolic process;cellular nitrogen compound metabolic process;biosynthetic process;protein-containing complex;helicase activity;anatomical structure development
ENSONIG00000000405	mannosidase, alpha, class 2B, member 1	man2b1	7.40445	8.65183	-1.17398	-0.231408	3.07716	1.04398	0.306897	0.999804	2	protein_coding	ZDB-GENE-050327-52			GO:0006013;GO:0004559;GO:0030246;GO:0005975;GO:0003824;GO:0016787;GO:0046872;GO:0016798;GO:0008152	mannose metabolic process;alpha-mannosidase activity;carbohydrate binding;carbohydrate metabolic process;catalytic activity;hydrolase activity;metal ion binding;hydrolase activity, acting on glycosyl bonds;metabolic process	biological_process;molecular_function	PTHR11607	ALPHA MANNOSIDASE ALPHA MANNOSIDASE MANNOSIDASE ALPHA CLASS MEMBER 1	GO:0003674;GO:0005975;GO:0016798;GO:0044281;GO:0043167;GO:0008150	molecular_function;carbohydrate metabolic process;hydrolase activity, acting on glycosyl bonds;small molecule metabolic process;ion binding;biological_process	00511+3.2.1.24
ENSONIG00000000407	SH3 and PX domains 2Ab	sh3pxd2ab	14.1149	14.5255	-1.03263	-0.0463241	3.88289	0.0496347	0.8237	0.999804	1	protein_coding	ZDB-GENE-101220-1			GO:0035091;GO:0005515	phosphatidylinositol binding;protein binding	molecular_function	PTHR15706_SF7	SH3 AND PX DOMAIN CONTAINING 2A FIVE SH3 DOMAIN CONTAINING SH3 MULTIPLE DOMAINS 1 TYROSINE KINASE SUBSTRATE WITH FIVE SH3 DOMAINS	GO:0003674;GO:0043167;GO:0008289	molecular_function;ion binding;lipid binding
ENSONIG00000000408	LIM and cysteine-rich domains 1	lmcd1	6.62021	5.79566	1.14367	0.193673	2.65422	0.709313	0.399672	0.999804	2	protein_coding	ZDB-GENE-040426-1067			GO:0008270;GO:0046872	zinc ion binding;metal ion binding	molecular_function	PTHR24211_SF0	LIM AND CYSTEINE RICH DOMAINS 1	GO:0003674;GO:0043167	molecular_function;ion binding
ENSONIG00000000409	E3 ubiquitin-protein ligase NEURL1		151.389	146.83	1.03088	0.0438766	7.23933	0.148049	0.700407	0.999804	2	protein_coding		100696677	I3IV81;I3IV80				PTHR12429_SF4	E3 UBIQUITIN LIGASE NEURL1 EC_2.3.2.27 NEURALIZED 1A NEURALIZED 1 RING TYPE E3 UBIQUITIN TRANSFERASE NEURL1
ENSONIG00000000410	sortilin related VPS10 domain containing receptor 3b	sorcs3b	21.0143	21.7662	-1.0359	-0.0508798	4.43374	0.114758	0.734791	0.999804	1	protein_coding	ZDB-GENE-131121-455			GO:0016021;GO:0005515;GO:0016020	integral component of membrane;protein binding;membrane	cellular_component;molecular_function	PTHR12106	VACUOLAR SORTING/TARGETING 10 PRECURSOR CARBOXYPEPTIDASE Y RECEPTOR CPY RECEPTOR SORTILIN VPS10 VACUOLAR CARBOXYPEPTIDASE SORTING RECEPTOR VPS10	GO:0003674;GO:0005575	molecular_function;cellular_component
ENSONIG00000000411	abhydrolase domain containing 6	ABHD6 (1 of many)	21.4078	25.9363	-1.21306	-0.278649	4.57635	3.17351	0.0748416	0.999804	1	protein_coding		100694246	I3IV83	GO:0016020;GO:0016021	membrane;integral component of membrane	cellular_component	PTHR10992_SF21	MONOACYLGLYCEROL LIPASE ABHD6 EC_3.1.1.23 2 ARACHIDONOYLGLYCEROL HYDROLASE ABHYDROLASE DOMAIN CONTAINING 6	GO:0005575	cellular_component
ENSONIG00000000413	PX domain containing serine/threonine kinase like	pxk	61.1018	63.7285	-1.04328	-0.0611326	5.94717	0.300466	0.583591	0.999804	1	protein_coding	ZDB-GENE-050208-393	100694512	I3IV85	GO:0035091;GO:0006468;GO:0004672;GO:0005524;GO:0003779	phosphatidylinositol binding;protein phosphorylation;protein kinase activity;ATP binding;actin binding	molecular_function;biological_process	PTHR22999_SF18	PX DOMAIN CONTAINING KINASE MODULATOR OF NA K ATPASE MONAKA	GO:0003674;GO:0008092;GO:0043167;GO:0016301;GO:0006464;GO:0008289	molecular_function;cytoskeletal protein binding;ion binding;kinase activity;cellular protein modification process;lipid binding
ENSONIG00000000414			22.8213	21.6156	1.05619	0.0788687	4.42728	0.360356	0.548308	0.999804	1	protein_coding				GO:0003676	nucleic acid binding	molecular_function	PTHR24409_SF10	ZINC FINGER	GO:0003674	molecular_function
ENSONIG00000000416	pyruvate dehydrogenase E1 beta subunit	pdhb	201.205	189.02	1.06499	0.0908389	7.5994	0.878465	0.348623	0.999804	1	protein_coding	ZDB-GENE-040426-2173	100705334	I3IV89	GO:0003824;GO:0055114;GO:0004738;GO:0043473	catalytic activity;oxidation-reduction process;pyruvate dehydrogenase activity;pigmentation	molecular_function;biological_process	PTHR11624_SF56	PYRUVATE DEHYDROGENASE E1 COMPONENT SUBUNIT BETA MITOCHONDRIAL PRECURSOR PDHE1 B EC_1.2.4.1	GO:0003674;GO:0008150;GO:0043473	molecular_function;biological_process;pigmentation
ENSONIG00000000417	triokinase/FMN cyclase	tkfc	6.89515	5.8945	1.16736	0.223253	2.75309	1.4381	0.230448	0.999804	1	protein_coding	ZDB-GENE-060929-652			GO:0006071;GO:0004371;GO:0005524;GO:0016310	glycerol metabolic process;glycerone kinase activity;ATP binding;phosphorylation	biological_process;molecular_function	TF313821	TRIOKINASE/FMN CYCLASE BIFUNCTIONAL ATP DEPENDENT DIHYDROXYACETONE KINASE/FAD AMP LYASE CYCLIZING [INCLUDES ATP DEPENDENT DIHYDROXYACETONE KINASE DHA KINASE EC_2.7.1.28 EC_2.7.1.- 29 GLYCERONE KINASE TRIOKINASE TRIOSE KINASE ; FAD AMP LYASE CYCLIZING EC_4.6.-.- 1 15 FAD AMP LYASE CYCLIC FMN FORMING FMN CYCLASE ]	GO:0003674;GO:0043167;GO:0016301;GO:0044281;GO:0005975	molecular_function;ion binding;kinase activity;small molecule metabolic process;carbohydrate metabolic process	00051+2.7.1.28;00561+2.7.1.29;00680+2.7.1.29
ENSONIG00000000418	zinc finger protein 106	znf106a	13.4101	11.521	1.16414	0.219263	3.66527	1.07264	0.300351	0.999804	2	protein_coding	ZDB-GENE-040718-21	100699374	I3IV91;I3IV92	GO:0003676;GO:0005515	nucleic acid binding;protein binding	molecular_function	PTHR14435	ZINC FINGER 106 ZFP 106 ZINC FINGER 474	GO:0003674	molecular_function
ENSONIG00000000419	VPS10 domain-containing receptor SorCS1	SORCS1	48.0074	58.7187	-1.2232	-0.290658	5.69812	5.55801	0.0183963	0.999804	1	protein_coding		100701060	I3IV93	GO:0016021;GO:0005515;GO:0016020	integral component of membrane;protein binding;membrane	cellular_component;molecular_function	PTHR12106	VACUOLAR SORTING/TARGETING 10 PRECURSOR CARBOXYPEPTIDASE Y RECEPTOR CPY RECEPTOR SORTILIN VPS10 VACUOLAR CARBOXYPEPTIDASE SORTING RECEPTOR VPS10	GO:0003674;GO:0005575	molecular_function;cellular_component
ENSONIG00000000420	transmembrane protein 206	tmem206	7.73998	7.19977	1.06985	0.097407	2.85876	0.142985	0.705332	0.999804	2	protein_coding	ZDB-GENE-040426-1173	100692154	I3IV94;I3IV95	GO:0016020;GO:0016021	membrane;integral component of membrane	cellular_component	PTHR16087	TRANSMEMBRANE 206	GO:0005575	cellular_component
ENSONIG00000000421	gamma-adducin	add3b	1078.54	1020.35	1.05698	0.0799479	10.0431	0.804653	0.369706	0.999804	2	protein_coding	ZDB-GENE-080718-6	100701333	I3IV97;I3IV96	GO:0005856	cytoskeleton	cellular_component	PTHR10672_SF5	GAMMA ADDUCIN ADDUCIN 70	GO:0005575;GO:0043226;GO:0005856	cellular_component;organelle;cytoskeleton
ENSONIG00000000422	potassium channel tetramerization domain containing 6	kctd6a	24.8479	21.5472	1.15461	0.207406	4.53466	2.28587	0.130557	0.999804	1	protein_coding	ZDB-GENE-050208-474	100705601	I3IV98	GO:0051260;GO:0005515	protein homooligomerization;protein binding	biological_process;molecular_function	PTHR14499_SF10	BTB/POZ DOMAIN CONTAINING KCTD6	GO:0003674;GO:0022607;GO:0065003	molecular_function;cellular component assembly;protein-containing complex assembly
ENSONIG00000000424	exocyst complex component 6B	exoc6b	15.5174	14.3927	1.07841	0.108904	3.87351	0.582222	0.445443	0.999804	1	protein_coding	ZDB-GENE-060929-132			GO:0000145;GO:0006904;GO:0006887	exocyst;vesicle docking involved in exocytosis;exocytosis	cellular_component;biological_process	PTHR12702	EXOCYST COMPLEX COMPONENT EXOCYST COMPLEX COMPONENT SEC15	GO:0032991;GO:0005575;GO:0006810;GO:0016192	protein-containing complex;cellular_component;transport;vesicle-mediated transport
ENSONIG00000000425	si:dkeyp-87e7.4	si:dkeyp-87e7.4	15.1021	13.4513	1.12381	0.168401	3.88487	1.36154	0.243272	0.999804	1	protein_coding	ZDB-GENE-030131-6208						PTHR14484	COILED COIL DOMAIN CONTAINING 71
ENSONIG00000000426			13.8302	17.2527	-1.24515	-0.316318	3.95469	2.91769	0.087613	0.999804	1	protein_coding				GO:0005540;GO:0007155;GO:0005509;GO:1901492	hyaluronic acid binding;cell adhesion;calcium ion binding;positive regulation of lymphangiogenesis	molecular_function;biological_process	PTHR24038_SF2	STABILIN 1 PRECURSOR FASCICLIN EGF LAMININ TYPE EGF AND LINK DOMAIN CONTAINING SCAVENGER RECEPTOR 1 FEEL 1	GO:0003674;GO:0043167;GO:0007155	molecular_function;ion binding;cell adhesion
ENSONIG00000000427	ezrin	ezra	13.3656	13.8465	-1.03443	-0.0488295	3.77283	0.0819853	0.774625	0.999804	1	protein_coding	ZDB-GENE-050522-18	100692424	I3IVA3	GO:0008092;GO:0005856;GO:0003779	cytoskeletal protein binding;cytoskeleton;actin binding	molecular_function;cellular_component	PTHR23281	MOESIN	GO:0003674;GO:0008092;GO:0005575;GO:0043226;GO:0005856	molecular_function;cytoskeletal protein binding;cellular_component;organelle;cytoskeleton
ENSONIG00000000428			2.19121	1.79867	1.21007	0.275091	1.16465	0.366415	0.544965	0.999804	1	protein_coding				GO:0005044;GO:0016020;GO:0016021;GO:0006898	scavenger receptor activity;membrane;integral component of membrane;receptor-mediated endocytosis	molecular_function;cellular_component;biological_process	PTHR19331_SF262	DELETED IN MALIGNANT BRAIN TUMORS 1 FRAGMENT	GO:0005575;GO:0003674;GO:0006810;GO:0016192	cellular_component;molecular_function;transport;vesicle-mediated transport
ENSONIG00000000429	potassium channel subfamily K member 3	kcnk3b	8.86809	8.29593	1.06346	0.0887679	3.14976	0.253305	0.614758	0.999804	1	protein_coding	ZDB-GENE-120709-43	100699913	I3IVA5	GO:0005252;GO:0071805;GO:0005267;GO:0016021;GO:0016020;GO:0006811;GO:0006813;GO:0060047	open rectifier potassium channel activity;potassium ion transmembrane transport;potassium channel activity;integral component of membrane;membrane;ion transport;potassium ion transport;heart contraction	molecular_function;biological_process;cellular_component	PTHR11003_SF101	POTASSIUM CHANNEL SUBFAMILY K MEMBER 3 ACID SENSITIVE POTASSIUM CHANNEL TASK 1 TWIK RELATED ACID SENSITIVE K + CHANNEL 1 TWO PORE POTASSIUM CHANNEL KT3 1 TWO PORE K + CHANNEL KT3 1	GO:0005575;GO:0022857;GO:0003674;GO:0006810;GO:0055085;GO:0003013	cellular_component;transmembrane transporter activity;molecular_function;transport;transmembrane transport;circulatory system process
ENSONIG00000000430			11.3253	13.4853	-1.18475	-0.244581	3.62258	2.00141	0.157153	0.999804	1	protein_coding				GO:0030151;GO:0030170;GO:0003824;GO:0016020;GO:0016021	molybdenum ion binding;pyridoxal phosphate binding;catalytic activity;membrane;integral component of membrane	molecular_function;cellular_component	PTHR14237_SF17	MITOCHONDRIAL AMIDOXIME REDUCING COMPONENT 2 PRECURSOR MARC2 EC 1 MOLYBDENUM COFACTOR SULFURASE C TERMINAL DOMAIN CONTAINING 2 MOSC DOMAIN CONTAINING 2 MOCO SULFURASE C TERMINAL DOMAIN CONTAINING 2	GO:0003674;GO:0043167;GO:0005575	molecular_function;ion binding;cellular_component	00790+2.8.1.9
ENSONIG00000000432	MAX interactor 1, dimerization protein	MXI1 (1 of many)	12.7055	14.4396	-1.13454	-0.182102	3.77942	1.28562	0.256856	0.999804	1	protein_coding			I3IVA8	GO:0046983	protein dimerization activity	molecular_function	PTHR11969_SF13	MAX INTERACTING 1 MAX INTERACTOR 1	GO:0003674	molecular_function
ENSONIG00000000433	HHIP-like 2	hhipl2	0.592233	0.637436	-1.05128	-0.0721457	-0.339193	0.0164652	0.897898	0.999804	1	protein_coding	ZDB-GENE-131120-145			GO:0003824	catalytic activity	molecular_function	PTHR19328_SF31	HHIP 2 PRECURSOR	GO:0003674	molecular_function
ENSONIG00000000434	survival motor neuron domain containing 1	smndc1	172.708	163.997	1.05293	0.0744133	7.37839	0.807291	0.368922	0.999804	1	protein_coding	ZDB-GENE-030131-614	100697211	I3IVB0	GO:0006397;GO:0005737;GO:0003723;GO:0005634	mRNA processing;cytoplasm;RNA binding;nucleus	biological_process;cellular_component;molecular_function	PTHR12664	SURVIVAL OF MOTOR NEURON RELATED SPLICING FACTOR 30 SURVIVAL MOTOR NEURON DOMAIN CONTAINING 1	GO:0005575;GO:0043226;GO:0005634;GO:0003674;GO:0003723;GO:0005737;GO:0034641;GO:0006397	cellular_component;organelle;nucleus;molecular_function;RNA binding;cytoplasm;cellular nitrogen compound metabolic process;mRNA processing
ENSONIG00000000435	ribosomal protein S12	rps12	96.4546	90.7471	1.06285	0.0879422	6.57751	0.192693	0.660685	0.999804	1	protein_coding	ZDB-GENE-030131-8951			GO:0005622;GO:0005840;GO:0006412;GO:0003735	intracellular;ribosome;translation;structural constituent of ribosome	cellular_component;biological_process;molecular_function	PTHR11843	40S RIBOSOMAL S12	GO:0003674;GO:0005198;GO:0003735;GO:0009058;GO:0034641;GO:0006412;GO:0032991;GO:0005575;GO:0043226;GO:0005840;GO:0005622	molecular_function;structural molecule activity;structural constituent of ribosome;biosynthetic process;cellular nitrogen compound metabolic process;translation;protein-containing complex;cellular_component;organelle;ribosome;intracellular
ENSONIG00000000436	EYA transcriptional coactivator and phosphatase 4	eya4	1.64916	1.60285	1.01965	0.0280761	0.791143	0.00405046	0.949254	0.999804	1	protein_coding	ZDB-GENE-050327-93			GO:0007605;GO:0007275;GO:0004725;GO:0016787;GO:0046872;GO:0004721;GO:0035335;GO:0001964;GO:0006470;GO:0007507;GO:0035050;GO:0042472;GO:0048923	sensory perception of sound;multicellular organism development;protein tyrosine phosphatase activity;hydrolase activity;metal ion binding;phosphoprotein phosphatase activity;peptidyl-tyrosine dephosphorylation;startle response;protein dephosphorylation;heart development;embryonic heart tube development;inner ear morphogenesis;posterior lateral line neuromast hair cell differentiation	biological_process;molecular_function	PTHR10190	EYES ABSENT HOMOLOG	GO:0016791;GO:0048856;GO:0050877;GO:0003674;GO:0043167;GO:0006464;GO:0030154	phosphatase activity;anatomical structure development;nervous system process;molecular_function;ion binding;cellular protein modification process;cell differentiation
ENSONIG00000000437	DDB1 and CUL4 associated factor 10	wdr32	56.9107	52.4344	1.08866	0.122549	5.75815	0.906878	0.340944	0.999804	2	protein_coding	ZDB-GENE-040426-2314	100700456	I3IVB4;I3IVB3	GO:0005515	protein binding	molecular_function	PTHR14588	DDB1 AND CUL4 ASSOCIATED FACTOR 10 WD REPEAT CONTAINING 32	GO:0003674	molecular_function
ENSONIG00000000438	BCL2 interacting protein 3	bnip3	24.624	24.1795	1.01745	0.0249644	4.66786	0.040267	0.840959	0.999804	1	protein_coding	ZDB-GENE-030131-8060	100697476	I3IVB5	GO:0005740;GO:0043065;GO:0016021;GO:0016020	mitochondrial envelope;positive regulation of apoptotic process;integral component of membrane;membrane	cellular_component;biological_process	PTHR15186	BCL2/ADENOVIRUS E1B 19 KDA INTERACTING 3	GO:0005575	cellular_component
ENSONIG00000000441	tripartite motif-containing protein 35		1.00764	0.673669	1.45453	0.540555	-0.16144	0.620703	0.430786	0.999804	3	protein_coding		100700078	I3IVC0;I3IVB9;I3IVB8	GO:0008270;GO:0046872	zinc ion binding;metal ion binding	molecular_function	PTHR24103_SF253	NUCLEAR FACTOR 7 XNF7	GO:0003674;GO:0043167	molecular_function;ion binding
ENSONIG00000000442	probable carboxypeptidase X1	cpxm1a	19.1094	18.9283	1.01066	0.0152997	4.29327	0.00862114	0.926023	0.999804	2	protein_coding	ZDB-GENE-030131-5284	100700724	I3IVC2;I3IVC1	GO:0004181;GO:0008270;GO:0006508	metallocarboxypeptidase activity;zinc ion binding;proteolysis	molecular_function;biological_process	PTHR11532_SF43	PROBABLE CARBOXYPEPTIDASE X1 PRECURSOR EC_3.4.17.- METALLOCARBOXYPEPTIDASE CPX 1	GO:0003674;GO:0043167	molecular_function;ion binding
ENSONIG00000000443	protein phosphatase 2, regulatory subunit B, delta	ppp2r2d	270.338	274.244	-1.01476	-0.0211389	8.10729	0.0648461	0.798994	0.999804	1	protein_coding	ZDB-GENE-040426-2086			GO:0000159;GO:0019888;GO:0005515;GO:0043666	protein phosphatase type 2A complex;protein phosphatase regulator activity;protein binding;regulation of phosphoprotein phosphatase activity	cellular_component;molecular_function;biological_process	PTHR11871	SERINE/THREONINE PHOSPHATASE 2A 55 KDA REGULATORY SUBUNIT B PP2A SUBUNIT B B55 PP2A SUBUNIT B PR55 PP2A SUBUNIT B R2 PP2A SUBUNIT B	GO:0003674;GO:0008150;GO:0030234;GO:0032991;GO:0005575	molecular_function;biological_process;enzyme regulator activity;protein-containing complex;cellular_component
ENSONIG00000000444			13.9539	14.366	-1.03018	-0.0429024	3.85568	0.0133854	0.907894	0.999804	1	protein_coding				GO:0005515;GO:0000166;GO:0005524	protein binding;nucleotide binding;ATP binding	molecular_function	PTHR24106_SF58	AMBIGUOUS	GO:0003674;GO:0043167	molecular_function;ion binding
ENSONIG00000000446	transcription factor 21	tcf21	0.433492	0.627707	-1.41047	-0.496176	-0.435619	0.400641	0.526759	0.999804	1	protein_coding		100628565	F6MFD2	GO:0046983	protein dimerization activity	molecular_function	PTHR23349_SF51	TRANSCRIPTION FACTOR 21 TCF 21 CAPSULIN EPICARDIN PODOCYTE EXPRESSED 1 POD 1	GO:0003674	molecular_function
ENSONIG00000000447	TATA-box binding protein like 1	tbpl1	20.4734	18.7034	1.09628	0.132623	4.3336	1.23884	0.265695	0.999804	1	protein_coding	ZDB-GENE-040520-2	100700349	I3IVC7	GO:0006352;GO:0003677;GO:0006366;GO:0009792	DNA-templated transcription, initiation;DNA binding;transcription by RNA polymerase II;embryo development ending in birth or egg hatching	biological_process;molecular_function	PTHR10126_SF13	TATA BOX BINDING 1 TBP 1 TATA BOX BINDING RELATED FACTOR 2 TBP RELATED FACTOR 2 TBP FACTOR	GO:0003674;GO:0003677;GO:0009058;GO:0034641;GO:0048856;GO:0009790	molecular_function;DNA binding;biosynthetic process;cellular nitrogen compound metabolic process;anatomical structure development;embryo development
ENSONIG00000000448			10.2808	11.3973	-1.10894	-0.149181	3.49772	0.0492187	0.824428	0.999804	1	protein_coding							TF613793	UNCHARACTERIZED
ENSONIG00000000449	RING finger protein 145	zmp:0000000662	27.8624	25.3362	1.09682	0.133322	4.78617	1.32428	0.249826	0.999804	1	protein_coding	ZDB-GENE-130530-665	100700992	I3IVC9	GO:0008270;GO:0016020;GO:0016021;GO:0046872	zinc ion binding;membrane;integral component of membrane;metal ion binding	molecular_function;cellular_component	PTHR12477_SF74	UNCHARACTERIZED	GO:0003674;GO:0043167;GO:0005575	molecular_function;ion binding;cellular_component
ENSONIG00000000450	solute carrier family 2 member 12	slc2a12	10.8077	13.1063	-1.21264	-0.278148	3.63459	2.37993	0.122903	0.999804	2	protein_coding	ZDB-GENE-040426-1513	100700625	I3IVD0;I3IVD1	GO:0005215;GO:0055085;GO:0022857;GO:0016021;GO:0016020;GO:0003179;GO:0007507;GO:0044381;GO:0060047	transporter activity;transmembrane transport;transmembrane transporter activity;integral component of membrane;membrane;heart valve morphogenesis;heart development;glucose import in response to insulin stimulus;heart contraction	molecular_function;biological_process;cellular_component	PTHR24063_SF91	SOLUTE CARRIER FAMILY 2 FACILITATED GLUCOSE TRANSPORTER MEMBER 12 GLUCOSE TRANSPORTER TYPE 12 GLUT 12	GO:0005575;GO:0022857;GO:0003674;GO:0006810;GO:0055085;GO:0048856;GO:0003013	cellular_component;transmembrane transporter activity;molecular_function;transport;transmembrane transport;anatomical structure development;circulatory system process
ENSONIG00000000451	transcription factor COE3	ebf3a	67.8347	72.4218	-1.06637	-0.0927059	6.13348	1.08802	0.29691	0.999804	1	protein_coding	ZDB-GENE-070112-292	100698009	I3IVD2	GO:0003700;GO:0006355;GO:0003677;GO:0046983;GO:0005634;GO:0046872;GO:0007275	DNA-binding transcription factor activity;regulation of transcription, DNA-templated;DNA binding;protein dimerization activity;nucleus;metal ion binding;multicellular organism development	molecular_function;biological_process;cellular_component	PTHR10747	TRANSCRIPTION FACTOR EARLY B CELL FACTOR	GO:0003674;GO:0003677;GO:0003700;GO:0005575;GO:0043226;GO:0005634;GO:0043167;GO:0048856	molecular_function;DNA binding;DNA-binding transcription factor activity;cellular_component;organelle;nucleus;ion binding;anatomical structure development
ENSONIG00000000452	serum/glucocorticoid regulated kinase 1	SGK1	149.923	145.638	1.03039	0.0431891	7.21737	0.179925	0.671438	0.999804	2	protein_coding		100698826	I3IVD4;I3IVD3	GO:0004674;GO:0006468;GO:0004672;GO:0005524;GO:0016740;GO:0000166;GO:0016301;GO:0016310	protein serine/threonine kinase activity;protein phosphorylation;protein kinase activity;ATP binding;transferase activity;nucleotide binding;kinase activity;phosphorylation	molecular_function;biological_process	PTHR24356_SF148	SERINE/THREONINE KINASE SGK1 EC_2.7.11.1 SERUM/GLUCOCORTICOID REGULATED KINASE 1	GO:0003674;GO:0043167;GO:0016301;GO:0006464	molecular_function;ion binding;kinase activity;cellular protein modification process
ENSONIG00000000453	cytochrome P450, family 26, subfamily b, polypeptide 1	cyp26b1	3.5649	3.2773	1.08025	0.111372	1.80412	0.120263	0.72875	0.999804	1	protein_coding	ZDB-GENE-030131-2908			GO:0004497;GO:0020037;GO:0016705;GO:0005506;GO:0055114;GO:0016491;GO:0046872	monooxygenase activity;heme binding;oxidoreductase activity, acting on paired donors, with incorporation or reduction of molecular oxygen;iron ion binding;oxidation-reduction process;oxidoreductase activity;metal ion binding	molecular_function;biological_process	PTHR24288	CYTOCHROME P450 EC_1.14.13.- RETINOIC ACID METABOLIZING CYTOCHROME	GO:0003674;GO:0043167;GO:0016491	molecular_function;ion binding;oxidoreductase activity
ENSONIG00000000454	ubiquitin-conjugating enzyme E2 D2	ube2d3	334.937	339.511	-1.01357	-0.019444	8.39573	0.0565167	0.812089	0.999804	1	protein_coding	ZDB-GENE-030131-551	100692968	I3IVD6	GO:0016740;GO:0000166;GO:0005524	transferase activity;nucleotide binding;ATP binding	molecular_function	PTHR24068_SF48	UBIQUITIN CONJUGATING ENZYME E2 EC_2.3.2.23 E3 INDEPENDENT E2 UBIQUITIN CONJUGATING ENZYME EC_2.3.2.- 24 E2 UBIQUITIN CONJUGATING ENZYME UBIQUITIN CARRIER UBIQUITIN CONJUGATING ENZYME E2 17 KB UBIQUITIN CONJUGATING ENZYME E2.17 KDA UBIQUITIN LIGASE	GO:0003674;GO:0043167	molecular_function;ion binding
ENSONIG00000000455	tripartite motif-containing protein 35		2.05166	2.96238	-1.43965	-0.525719	1.48907	1.2965	0.254853	0.999804	1	protein_coding		102077400	I3IVD7	GO:0008270;GO:0005515;GO:0046872	zinc ion binding;protein binding;metal ion binding	molecular_function	PTHR24103_SF249	AMBIGUOUS	GO:0003674;GO:0043167	molecular_function;ion binding
ENSONIG00000000456	mannosidase beta	manba	17.838	18.3753	-1.03423	-0.0485532	4.15634	0.0888126	0.765692	0.999804	2	protein_coding	ZDB-GENE-040426-721	100701268	I3IVD9;I3IVD8	GO:0004553;GO:0005975	hydrolase activity, hydrolyzing O-glycosyl compounds;carbohydrate metabolic process	molecular_function;biological_process	PTHR10066_SF12	BETA MANNOSIDASE B EC_3.2.1.25 MANNANASE B MANNASE B	GO:0005975;GO:0016798	carbohydrate metabolic process;hydrolase activity, acting on glycosyl bonds	00531+3.2.1.23;00511+3.2.1.23;00052+3.2.1.23;00600+3.2.1.23;00604+3.2.1.23;00511+3.2.1.25
ENSONIG00000000457	nischarin	nisch	31.428	30.2703	1.04118	0.0582171	4.91791	0.226339	0.634252	0.999804	3	protein_coding	ZDB-GENE-050208-570			GO:0005178;GO:0035091;GO:0005515	integrin binding;phosphatidylinositol binding;protein binding	molecular_function	PTHR15454_SF7	NISCHARIN IMIDAZOLINE RECEPTOR 1 I 1 IR1 IMIDAZOLINE RECEPTOR 1 IMIDAZOLINE 1 RECEPTOR I1R	GO:0003674;GO:0043167;GO:0008289	molecular_function;ion binding;lipid binding
ENSONIG00000000459	aldehyde dehydrogenase 8 family, member A1	aldh8a1	1.59992	1.64735	-1.00394	-0.00567985	0.877134	0.000156293	0.990025	0.999804	1	protein_coding	ZDB-GENE-040912-3			GO:0016620;GO:0055114;GO:0016491;GO:0001889	oxidoreductase activity, acting on the aldehyde or oxo group of donors, NAD or NADP as acceptor;oxidation-reduction process;oxidoreductase activity;liver development	molecular_function;biological_process	PTHR11699_SF42	2 AMINOMUCONIC SEMIALDEHYDE DEHYDROGENASE EC_1.2.1.32 ALDEHYDE DEHYDROGENASE FAMILY 8 MEMBER A1	GO:0016491;GO:0048856	oxidoreductase activity;anatomical structure development
ENSONIG00000000460	HBS1-like translational GTPase	hbs1l	69.6575	67.5438	1.03061	0.0434979	6.11204	0.220198	0.638889	0.999804	2	protein_coding	ZDB-GENE-030131-2987			GO:0003924;GO:0005525	GTPase activity;GTP binding	molecular_function	PTHR23115_SF38	UNKNOWN	GO:0003674;GO:0043167;GO:0003924	molecular_function;ion binding;GTPase activity
ENSONIG00000000461	dysferlin, limb girdle muscular dystrophy 2B (autosomal recessive)	dysf	8.77811	10.4346	-1.18269	-0.242069	3.21062	1.18729	0.275877	0.999804	1	protein_coding	ZDB-GENE-070501-1			GO:0016021;GO:0016020;GO:0001778;GO:0033292;GO:0048644;GO:0030315;GO:0042383	integral component of membrane;membrane;plasma membrane repair;T-tubule organization;muscle organ morphogenesis;T-tubule;sarcolemma	cellular_component;biological_process	PTHR12546_SF35	DYSFERLIN DYSTROPHY ASSOCIATED FER 1 FER 1 1	GO:0005575;GO:0061024;GO:0007009;GO:0048856;GO:0005886	cellular_component;membrane organization;plasma membrane organization;anatomical structure development;plasma membrane
ENSONIG00000000462	HGH1 homolog	hgh1	12.276	12.6038	-1.0247	-0.0351991	3.63677	0.0450073	0.831991	0.999804	1	protein_coding	ZDB-GENE-040718-228	100695570	I3IVE8				PTHR13387	HGH1 HOMOLOG
ENSONIG00000000464	HCK proto-oncogene, Src family tyrosine kinase	hck	57.9213	60.273	-1.04083	-0.057736	5.93524	0.113809	0.735848	0.999804	1	protein_coding	ZDB-GENE-090313-72			GO:0004713;GO:0006468;GO:0004672;GO:0005524;GO:0005515;GO:0016740;GO:0000166;GO:0016301;GO:0016310;GO:0004715;GO:0018108	protein tyrosine kinase activity;protein phosphorylation;protein kinase activity;ATP binding;protein binding;transferase activity;nucleotide binding;kinase activity;phosphorylation;non-membrane spanning protein tyrosine kinase activity;peptidyl-tyrosine phosphorylation	molecular_function;biological_process	PTHR24418_SF181	TYROSINE KINASE HCK EC_2.7.10.2 HEMATOPOIETIC CELL KINASE HEMOPOIETIC CELL KINASE HCK	GO:0003674;GO:0043167;GO:0016301;GO:0006464	molecular_function;ion binding;kinase activity;cellular protein modification process	04660+2.7.10.2
ENSONIG00000000465	transmembrane 9 superfamily member 4	tm9sf4	253.489	251.547	1.00771	0.0110789	8.02332	0.0116702	0.913973	0.999804	1	protein_coding	ZDB-GENE-040426-1575	100699705	I3IVF1	GO:0016021;GO:0016020	integral component of membrane;membrane	cellular_component	PTHR10766_SF34	TRANSMEMBRANE 9 SUPERFAMILY MEMBER 4 PRECURSOR	GO:0005575	cellular_component
ENSONIG00000000466	transmembrane protein 263	zgc:153675	13.7297	12.0001	1.14124	0.190607	3.56902	0.567846	0.451116	0.999804	3	protein_coding	ZDB-GENE-061013-567	100706129	I3IVF2;I3IVF4;I3IVF3				PTHR31443	TRANSMEMBRANE 263
ENSONIG00000000467	SOS Ras/Rho guanine nucleotide exchange factor 2	sos2	21.8389	22.4131	-1.02727	-0.0388161	4.42283	0.0529337	0.818035	0.999804	2	protein_coding	ZDB-GENE-090319-5	100701539	I3IVF6;I3IVF5	GO:0000786;GO:0046982;GO:0005085;GO:0007264;GO:0035023;GO:0005089;GO:0005622;GO:0003677;GO:0048793	nucleosome;protein heterodimerization activity;guanyl-nucleotide exchange factor activity;small GTPase mediated signal transduction;regulation of Rho protein signal transduction;Rho guanyl-nucleotide exchange factor activity;intracellular;DNA binding;pronephros development	cellular_component;molecular_function;biological_process	PTHR23113_SF150	SON OF SEVENLESS HOMOLOG 2 SOS 2	GO:0003674;GO:0003677;GO:0005575;GO:0005622;GO:0007165;GO:0032991;GO:0048856	molecular_function;DNA binding;cellular_component;intracellular;signal transduction;protein-containing complex;anatomical structure development
ENSONIG00000000468	RB binding protein 5, histone lysine methyltransferase complex subunit	rbbp5	32.1694	33.1643	-1.03038	-0.0431792	5.0594	0.1617	0.687596	0.999804	1	protein_coding	ZDB-GENE-040426-886	100706391	I3IVF7	GO:0048188;GO:0005515	Set1C/COMPASS complex;protein binding	cellular_component;molecular_function	PTHR12816_SF21	RETINOBLASTOMA BINDING 5	GO:0003674;GO:0032991;GO:0005575	molecular_function;protein-containing complex;cellular_component
ENSONIG00000000469	MYB proto-oncogene, transcription factor	myb	1.10908	1.54038	-1.39991	-0.485334	0.433726	0.881714	0.347733	0.999804	2	protein_coding	ZDB-GENE-991110-14	100700889	I3IVF8;I3IVF9	GO:0006355;GO:0003677;GO:0000981;GO:0001654;GO:0006357;GO:0035701;GO:0043009;GO:0045658;GO:0060216;GO:0060271;GO:0000785	regulation of transcription, DNA-templated;DNA binding;DNA-binding transcription factor activity, RNA polymerase II-specific;eye development;regulation of transcription by RNA polymerase II;hematopoietic stem cell migration;chordate embryonic development;regulation of neutrophil differentiation;definitive hemopoiesis;cilium assembly;chromatin	biological_process;molecular_function;cellular_component	PTHR10641_SF454	TRANSCRIPTIONAL ACTIVATOR MYB PROTO ONCOGENE C MYB	GO:0003674;GO:0003677;GO:0003700;GO:0048856;GO:0048870;GO:0040011;GO:0009790;GO:0022607;GO:0005575	molecular_function;DNA binding;DNA-binding transcription factor activity;anatomical structure development;cell motility;locomotion;embryo development;cellular component assembly;cellular_component
ENSONIG00000000470	O-6-methylguanine-DNA methyltransferase	MGMT	12.3372	10.9078	1.13217	0.179085	3.67896	1.15154	0.283227	0.999804	1	protein_coding		100701879	I3IVG0	GO:0003908;GO:0006281;GO:0003824;GO:0032259	methylated-DNA-[protein]-cysteine S-methyltransferase activity;DNA repair;catalytic activity;methylation	molecular_function;biological_process	PTHR10815_SF5	METHYLATED DNA CYSTEINE METHYLTRANSFERASE EC_2.1.1.63 6 O METHYLGUANINE DNA METHYLTRANSFERASE MGMT O 6 METHYLGUANINE DNA ALKYLTRANSFERASE	GO:0003674;GO:0006259;GO:0006950;GO:0034641;GO:0008168	molecular_function;DNA metabolic process;response to stress;cellular nitrogen compound metabolic process;methyltransferase activity
ENSONIG00000000471	receptor-type tyrosine-protein phosphatase epsilon	ptpreb	57.8093	51.9833	1.10927	0.149612	5.7699	2.17364	0.140394	0.999804	1	protein_coding	ZDB-GENE-060503-263	100702149	I3IVG1	GO:0016791;GO:0016311;GO:0006470;GO:0004725;GO:0016020;GO:0016021;GO:0016787;GO:0004721;GO:0035335;GO:0060027	phosphatase activity;dephosphorylation;protein dephosphorylation;protein tyrosine phosphatase activity;membrane;integral component of membrane;hydrolase activity;phosphoprotein phosphatase activity;peptidyl-tyrosine dephosphorylation;convergent extension involved in gastrulation	molecular_function;biological_process;cellular_component	PTHR19134_SF49	RECEPTOR TYPE TYROSINE PHOSPHATASE EPSILON PRECURSOR TYROSINE PHOSPHATASE EPSILON R PTP EPSILON EC_3.1.3.48	GO:0016791;GO:0006464;GO:0005575	phosphatase activity;cellular protein modification process;cellular_component
ENSONIG00000000472	inositol-pentakisphosphate 2-kinase	ippk	28.256	30.5686	-1.08078	-0.112072	4.86812	0.546303	0.459832	0.999804	2	protein_coding	ZDB-GENE-050327-41	100695839	I3IVG2;I3IVG3	GO:0035299;GO:0005524;GO:0016740;GO:0000166;GO:0016301;GO:0016310;GO:0007368;GO:0032402;GO:0060287;GO:0005813;GO:0036064	inositol pentakisphosphate 2-kinase activity;ATP binding;transferase activity;nucleotide binding;kinase activity;phosphorylation;determination of left/right symmetry;melanosome transport;epithelial cilium movement involved in determination of left/right asymmetry;centrosome;ciliary basal body	molecular_function;biological_process;cellular_component	PTHR14456	UNKNOWN	GO:0003674;GO:0043167;GO:0016301;GO:0006810;GO:0005575;GO:0005815	molecular_function;ion binding;kinase activity;transport;cellular_component;microtubule organizing center	04070+2.7.1.158;00562+2.7.1.158
ENSONIG00000000473	PLAG1 like zinc finger 2	plagl2	1.54757	1.43335	1.08324	0.115347	0.496376	0.0657039	0.797698	0.999804	2	protein_coding	ZDB-GENE-020806-1	100699970	I3IVG4;I3IVG5	GO:0003676	nucleic acid binding	molecular_function	PTHR10032_SF207	PLEIOMORPHIC ADENOMA 2 FRAGMENT	GO:0003674	molecular_function
ENSONIG00000000474	protein O-fucosyltransferase 1	pofut1	3.41469	4.473	-1.29948	-0.377938	2.02481	2.23145	0.135227	0.999804	1	protein_coding	ZDB-GENE-040303-2	100700240	I3IVG6	GO:0008417;GO:0007219;GO:0016740;GO:0016757;GO:0005975;GO:0006004;GO:0036065	fucosyltransferase activity;Notch signaling pathway;transferase activity;transferase activity, transferring glycosyl groups;carbohydrate metabolic process;fucose metabolic process;fucosylation	molecular_function;biological_process	PTHR21420	GDP FUCOSE O FUCOSYLTRANSFERASE 1 EC_2.4.1.221 PEPTIDE O FUCOSYLTRANSFERASE 1 O FUCT 1	GO:0007165;GO:0016757;GO:0005975;GO:0044281	signal transduction;transferase activity, transferring glycosyl groups;carbohydrate metabolic process;small molecule metabolic process	00514+2.4.1.221
ENSONIG00000000475	extracellular matrix protein 2	ECM2	6.22127	6.86997	-1.10143	-0.139382	2.77375	0.436182	0.508971	0.999804	1	protein_coding			I3IVG7	GO:0005515	protein binding	molecular_function	PTHR24371_SF56	EXTRACELLULAR MATRIX 2 PRECURSOR	GO:0003674	molecular_function
ENSONIG00000000476	phosphodiesterase 7B	PDE7B	10.5986	10.5033	1.012	0.0172132	3.42828	0.0107404	0.917458	0.999804	1	protein_coding				GO:0008081;GO:0004114;GO:0007165;GO:0016787;GO:0046872	phosphoric diester hydrolase activity;3',5'-cyclic-nucleotide phosphodiesterase activity;signal transduction;hydrolase activity;metal ion binding	molecular_function;biological_process	PTHR11347_SF72	CAMP SPECIFIC 3' 5' CYCLIC PHOSPHODIESTERASE 7B EC_3.1.4.53	GO:0007165;GO:0003674;GO:0043167	signal transduction;molecular_function;ion binding
ENSONIG00000000477	L-2-hydroxyglutarate dehydrogenase	l2hgdh	13.0023	13.6712	-1.04744	-0.0668662	3.73923	0.177903	0.673182	0.999804	1	protein_coding	ZDB-GENE-090319-6			GO:0055114;GO:0016491	oxidation-reduction process;oxidoreductase activity	biological_process;molecular_function	PTHR13847_SF171	L 2 HYDROXYGLUTARATE DEHYDROGENASE MITOCHONDRIAL PRECURSOR EC_1.1.99.2	GO:0016491	oxidoreductase activity
ENSONIG00000000480	distal membrane arm assembly complex 2 like	dmac2l	19.5865	19.7836	-1.01088	-0.0156083	4.32071	0.0124954	0.910996	0.999804	1	protein_coding	ZDB-GENE-040426-959	100693953	I3IVH2				PTHR13382	ATP SYNTHASE SUBUNIT S MITOCHONDRIAL PRECURSOR ATP SYNTHASE COUPLING FACTOR B DISTAL MEMBRANE ARM ASSEMBLY COMPLEX 2 MITOCHONDRIAL ATP SYNTHASE REGULATORY COMPONENT FACTOR B
ENSONIG00000000483	cyclin-dependent kinase-like 1 (CDC2-related kinase)	cdkl1	6.44911	6.42166	-1.00133	-0.0019164	2.68009	6.21904e-05	0.993708	0.999804	1	protein_coding	ZDB-GENE-040808-34			GO:0006468;GO:0004672;GO:0005524;GO:0000166;GO:0004674	protein phosphorylation;protein kinase activity;ATP binding;nucleotide binding;protein serine/threonine kinase activity	biological_process;molecular_function	PTHR24056_SF153	CYCLIN DEPENDENT KINASE 1 EC_2.7.11.22	GO:0003674;GO:0043167;GO:0016301;GO:0006464	molecular_function;ion binding;kinase activity;cellular protein modification process
ENSONIG00000000484	armadillo repeat-containing protein 1	armc1l	59.4641	60.4066	-1.01715	-0.0245254	5.84736	0.0131038	0.908864	0.999804	1	protein_coding	ZDB-GENE-030131-9819	100709043	I3IVH6	GO:0030001;GO:0046872;GO:0005515	metal ion transport;metal ion binding;protein binding	biological_process;molecular_function	TF635058	ARMADILLO REPEAT CONTAINING 1	GO:0003674;GO:0043167;GO:0006810	molecular_function;ion binding;transport
ENSONIG00000000485	protein FAM196A		8.86758	8.53979	1.03558	0.0504413	3.13676	0.0798627	0.777484	0.999804	1	protein_coding		100702415	I3IVH7				TF333465	INSYN2B INHIBITORY SYNAPTIC FACTOR FAMILY MEMBER 2B
ENSONIG00000000486	mitogen-activated protein kinase kinase kinase kinase 5	map4k5	32.9058	35.6268	-1.07794	-0.108278	5.12691	0.583323	0.445013	0.999804	2	protein_coding	ZDB-GENE-030131-6497			GO:0008349;GO:0006468;GO:0004672;GO:0005524;GO:0016740;GO:0000166;GO:0004674;GO:0016301;GO:0016310;GO:0000165;GO:0000185	MAP kinase kinase kinase kinase activity;protein phosphorylation;protein kinase activity;ATP binding;transferase activity;nucleotide binding;protein serine/threonine kinase activity;kinase activity;phosphorylation;MAPK cascade;activation of MAPKKK activity	molecular_function;biological_process	PTHR24361_SF203	MITOGEN ACTIVATED KINASE KINASE KINASE KINASE 5 EC_2.7.11.1 MAPK/ERK KINASE KINASE KINASE 5 MEK KINASE KINASE 5 MEKKK 5	GO:0003674;GO:0043167;GO:0016301;GO:0006464;GO:0007165	molecular_function;ion binding;kinase activity;cellular protein modification process;signal transduction	04151+2.7.11.1;04150+2.7.11.1;05165+2.7.11.1;04926+2.7.11.1;04714+2.7.11.1;05170+2.7.11.1;05163+2.7.11.1
ENSONIG00000000488	osteoglycin, paralog a	ogna	5.87622	6.53318	-1.11796	-0.160862	2.64815	0.296171	0.586293	0.999804	1	protein_coding	ZDB-GENE-050208-650			GO:0005515	protein binding	molecular_function	PTHR24371_SF5	MIMECAN PRECURSOR OSTEOGLYCIN	GO:0003674	molecular_function
ENSONIG00000000489	si:ch73-217b7.1	si:ch73-217b7.1	25.2976	25.4379	-1.00759	-0.0109048	4.67144	0.00657694	0.935364	0.999804	1	protein_coding	ZDB-GENE-050208-210			GO:0015630;GO:0000226	microtubule cytoskeleton;microtubule cytoskeleton organization	cellular_component;biological_process	PTHR15073	MAP7 DOMAIN CONTAINING	GO:0007010;GO:0005575;GO:0043226;GO:0005856	cytoskeleton organization;cellular_component;organelle;cytoskeleton
ENSONIG00000000490	kinesin family member 3B	kif3b	39.0351	34.8984	1.12095	0.164717	5.23733	1.82781	0.176386	0.999804	1	protein_coding	ZDB-GENE-050119-3			GO:0007018;GO:0008017;GO:0003777;GO:0005524;GO:0000166;GO:0003774;GO:0035845;GO:0043584;GO:0046530;GO:0048793;GO:0048839;GO:0048884;GO:0060041;GO:0060042;GO:0060271;GO:0005871;GO:0005874	microtubule-based movement;microtubule binding;microtubule motor activity;ATP binding;nucleotide binding;motor activity;photoreceptor cell outer segment organization;nose development;photoreceptor cell differentiation;pronephros development;inner ear development;neuromast development;retina development in camera-type eye;retina morphogenesis in camera-type eye;cilium assembly;kinesin complex;micr…	biological_process;molecular_function;cellular_component	PTHR24115_SF349	KINESIN	GO:0003674;GO:0043167;GO:0008092;GO:0048856;GO:0030154;GO:0022607;GO:0032991;GO:0005575	molecular_function;ion binding;cytoskeletal protein binding;anatomical structure development;cell differentiation;cellular component assembly;protein-containing complex;cellular_component
ENSONIG00000000491	nucleolar protein 8	nol8	9.117	7.84762	1.16744	0.223347	3.10697	0.866825	0.351836	0.999804	3	protein_coding	ZDB-GENE-050208-491			GO:0003676;GO:0003723	nucleic acid binding;RNA binding	molecular_function	PTHR16274	NUCLEOLAR 8	GO:0003674;GO:0003723	molecular_function;RNA binding
ENSONIG00000000492	disintegrin and metalloproteinase domain-containing protein 12	adam12	6.85801	6.77683	1.01139	0.0163449	2.76025	0.00369748	0.951513	0.999804	2	protein_coding	ZDB-GENE-070809-1	100703495	I3IVI7;I3IVI8	GO:0004222;GO:0008237;GO:0006508;GO:0016020;GO:0016021	metalloendopeptidase activity;metallopeptidase activity;proteolysis;membrane;integral component of membrane	molecular_function;biological_process;cellular_component	PTHR11905_SF112	DISINTEGRIN AND METALLOPROTEINASE DOMAIN CONTAINING 12 PRECURSOR ADAM 12 EC_3.4.24.- MELTRIN ALPHA	GO:0008233;GO:0005575	peptidase activity;cellular_component
ENSONIG00000000493	protein-L-isoaspartate (D-aspartate) O-methyltransferase domain containing 2	PCMTD2	25.9437	27.3044	-1.05298	-0.0744751	4.75454	0.365608	0.545408	0.999804	1	protein_coding			I3IVI9	GO:0004719;GO:0006464;GO:0032259;GO:0006479	protein-L-isoaspartate (D-aspartate) O-methyltransferase activity;cellular protein modification process;methylation;protein methylation	molecular_function;biological_process	PTHR11579	L ISOASPARTATE D ASPARTATE O METHYLTRANSFERASE PIMT EC_2.1.1.77 L ISOASPARTYL CARBOXYL METHYLTRANSFERASE L ISOASPARTYL/D ASPARTYL METHYLTRANSFERASE BETA ASPARTATE METHYLTRANSFERASE	GO:0006464;GO:0008168	cellular protein modification process;methyltransferase activity
ENSONIG00000000494	G protein-coupled receptor 37 like 1a	gpr37l1a	13.9795	14.416	-1.03273	-0.0464619	3.87563	0.100379	0.751376	0.999804	1	protein_coding	ZDB-GENE-110411-20			GO:0016021;GO:0007186;GO:0004930;GO:0016020	integral component of membrane;G protein-coupled receptor signaling pathway;G protein-coupled receptor activity;membrane	cellular_component;biological_process;molecular_function	PTHR24243	RECEPTOR	GO:0003674;GO:0007165;GO:0005575	molecular_function;signal transduction;cellular_component
ENSONIG00000000495	protein phosphatase 1 regulatory inhibitor subunit 14C	ppp1r14c	16.2895	16.3097	1.00271	0.00391076	4.02063	0.000629138	0.979989	0.999804	1	protein_coding	ZDB-GENE-050706-92	100691169	I3IVJ1	GO:0042325;GO:0005737	regulation of phosphorylation;cytoplasm	biological_process;cellular_component	PTHR16188	PHOSPHATASE 1 REGULATORY SUBUNIT PKC POTENTIATED PP1	GO:0005575;GO:0005737	cellular_component;cytoplasm
ENSONIG00000000496	ATPase plasma membrane Ca2+ transporting 4	atp2b4	154.425	127.94	1.20723	0.271706	7.11173	3.1813	0.0744857	0.999804	1	protein_coding	ZDB-GENE-061027-60			GO:0005388;GO:0000166;GO:0070588;GO:0016021;GO:0005524;GO:0016020;GO:0006811;GO:0016787;GO:0006816;GO:0099132	calcium-transporting ATPase activity;nucleotide binding;calcium ion transmembrane transport;integral component of membrane;ATP binding;membrane;ion transport;hydrolase activity;calcium ion transport;ATP hydrolysis coupled cation transmembrane transport	molecular_function;biological_process;cellular_component	PTHR24093_SF276	PLASMA MEMBRANE CALCIUM TRANSPORTING ATPASE 4 PMCA4 EC_3.6.3.8 PLASMA MEMBRANE CALCIUM ATPASE 4 PLASMA MEMBRANE CALCIUM PUMP 4	GO:0005575;GO:0003674;GO:0043167;GO:0006810;GO:0055085;GO:0022857;GO:0016887	cellular_component;molecular_function;ion binding;transport;transmembrane transport;transmembrane transporter activity;ATPase activity
ENSONIG00000000497	iodotyrosine deiodinase	si:ch211-286f9.2	8.64761	9.67286	-1.12316	-0.167568	3.24019	0.347039	0.555794	0.999804	1	protein_coding	ZDB-GENE-090313-109	100692784	I3IVJ3	GO:0016491;GO:0055114	oxidoreductase activity;oxidation-reduction process	molecular_function;biological_process	PTHR23026	IODOTYROSINE DEIODINASE 1 PRECURSOR IYD 1 EC_1.21.1.1 IODOTYROSINE DEHALOGENASE 1	GO:0016491	oxidoreductase activity
ENSONIG00000000498	alcohol dehydrogenase, iron containing, 1	adhfe1	11.7672	12.5442	-1.06146	-0.0860548	3.63377	0.148003	0.700451	0.999804	1	protein_coding	ZDB-GENE-040426-2070			GO:0046872;GO:0055114;GO:0016491	metal ion binding;oxidation-reduction process;oxidoreductase activity	molecular_function;biological_process	PTHR11496	HYDROXYACID OXOACID TRANSHYDROGENASE MITOCHONDRIAL PRECURSOR HOT EC_1.1.99.24	GO:0016491;GO:0003674;GO:0043167	oxidoreductase activity;molecular_function;ion binding
ENSONIG00000000499	myelin transcription factor 1b	myt1b	28.3932	31.033	-1.09375	-0.12929	4.84857	0.871049	0.350665	0.999804	3	protein_coding	ZDB-GENE-090313-67			GO:0140110;GO:0008270;GO:0005634;GO:0006355;GO:0003322	transcription regulator activity;zinc ion binding;nucleus;regulation of transcription, DNA-templated;pancreatic A cell development	molecular_function;cellular_component;biological_process	PTHR10816_SF10	MYELIN TRANSCRIPTION FACTOR 1 MYT1	GO:0005575;GO:0043226;GO:0005634;GO:0003674;GO:0043167;GO:0048856;GO:0030154	cellular_component;organelle;nucleus;molecular_function;ion binding;anatomical structure development;cell differentiation
ENSONIG00000000500	SEC63 homolog, protein translocation regulator	sec63	51.0971	46.1752	1.10516	0.144257	5.59135	0.659547	0.41672	0.999804	2	protein_coding	ZDB-GENE-040718-328	100695372	I3IVJ8;I3IVJ9	GO:0031204;GO:0016020;GO:0016021;GO:0005623;GO:0001889;GO:0030968;GO:0042552	posttranslational protein targeting to membrane, translocation;membrane;integral component of membrane;cell;liver development;endoplasmic reticulum unfolded protein response;myelination	biological_process;cellular_component	PTHR24075	TRANSLOCATION SEC63	GO:0006810;GO:0055085;GO:0006605;GO:0005575;GO:0005623;GO:0048856;GO:0006950;GO:0007165	transport;transmembrane transport;protein targeting;cellular_component;cell;anatomical structure development;response to stress;signal transduction
ENSONIG00000000501	Scm polycomb group protein like 4	scml4	32.9861	37.7362	-1.14164	-0.191107	5.16869	2.06537	0.150679	0.999804	2	protein_coding	ZDB-GENE-041210-338			GO:0005515;GO:0016020;GO:0016021;GO:0060216	protein binding;membrane;integral component of membrane;definitive hemopoiesis	molecular_function;cellular_component;biological_process	PTHR12247_SF6	SEX COMB ON MIDLEG 4	GO:0003674;GO:0005575;GO:0048856	molecular_function;cellular_component;anatomical structure development
ENSONIG00000000502	neuroblastoma amplified sequence	nbas	23.0848	24.5949	-1.06271	-0.0877541	4.56716	0.228752	0.632451	0.999804	1	protein_coding	ZDB-GENE-041014-367	100702248	I3IVK2	GO:0006890;GO:0005515;GO:0000184;GO:0000956;GO:0043009;GO:2000623	retrograde vesicle-mediated transport, Golgi to endoplasmic reticulum;protein binding;nuclear-transcribed mRNA catabolic process, nonsense-mediated decay;nuclear-transcribed mRNA catabolic process;chordate embryonic development;negative regulation of nuclear-transcribed mRNA catabolic process, nonsense-mediated decay	biological_process;molecular_function	PTHR15922	NEUROBLASTOMA AMPLIFIED SEQUENCE NEUROBLASTOMA AMPLIFIED GENE	GO:0003674;GO:0006810;GO:0016192;GO:0009056;GO:0034641;GO:0034655;GO:0048856;GO:0009790	molecular_function;transport;vesicle-mediated transport;catabolic process;cellular nitrogen compound metabolic process;nucleobase-containing compound catabolic process;anatomical structure development;embryo development
ENSONIG00000000505	TBC1 domain family, member 22B	tbc1d22b	17.2844	16.0234	1.07638	0.106189	4.1135	0.526022	0.468284	0.999804	1	protein_coding	ZDB-GENE-091118-28						PTHR22957_SF239	TBC1 DOMAIN FAMILY MEMBER 22B
ENSONIG00000000506	putative pre-mRNA-splicing factor ATP-dependent RNA helicase DHX32	dhx32b	8.69647	9.00916	-1.03466	-0.0491505	3.20982	0.050168	0.822771	0.999804	1	protein_coding	ZDB-GENE-130613-5	100703771	I3IVK6	GO:0004386;GO:0000166;GO:0005524;GO:0016787	helicase activity;nucleotide binding;ATP binding;hydrolase activity	molecular_function	PTHR18934_SF88	PRE SPLICING FACTOR ATP DEPENDENT RNA HELICASE DHX32 EC_3.6.4.13 DEAH BOX 32	GO:0004386;GO:0003674;GO:0043167	helicase activity;molecular_function;ion binding
ENSONIG00000000507	erythroid differentiation regulatory factor 1	edrf1	15.9924	15.4814	1.03229	0.0458422	3.99092	0.0570287	0.811255	0.999804	1	protein_coding	ZDB-GENE-131121-620	100704037	I3IVK7				PTHR15000	ERYTHROID DIFFERENTIATION RELATED FACTOR 1
ENSONIG00000000509	atlastin GTPase 1	atl1	182.282	175.294	1.04023	0.0569036	7.49178	0.487062	0.485241	0.999804	1	protein_coding	ZDB-GENE-030131-8003	100701812	I3IVK9	GO:0003924;GO:0005525;GO:0016020;GO:0016021;GO:0000166;GO:0030514;GO:0048263;GO:0005770	GTPase activity;GTP binding;membrane;integral component of membrane;nucleotide binding;negative regulation of BMP signaling pathway;determination of dorsal identity;late endosome	molecular_function;cellular_component;biological_process	PTHR10751_SF15	ATLASTIN 1 EC_3.6.5.-	GO:0003674;GO:0043167;GO:0003924;GO:0005575;GO:0043226;GO:0005768;GO:0031410	molecular_function;ion binding;GTPase activity;cellular_component;organelle;endosome;cytoplasmic vesicle
ENSONIG00000000510			52.507	54.6609	-1.03891	-0.0550705	5.75225	0.399564	0.527315	0.999804	2	protein_coding				GO:0016616;GO:0051287;GO:0055114	oxidoreductase activity, acting on the CH-OH group of donors, NAD or NADP as acceptor;NAD binding;oxidation-reduction process	molecular_function;biological_process	TF663282	AMBIGUOUS	GO:0003674	molecular_function
ENSONIG00000000511	pyridoxal phosphate binding protein	plpbp	43.6692	45.1746	-1.0367	-0.0519939	5.44438	0.0729933	0.787027	0.999804	2	protein_coding	ZDB-GENE-030131-1378	100701230	I3IVL2;I3IVL3	GO:0005643;GO:0006913;GO:0030170;GO:0017056	nuclear pore;nucleocytoplasmic transport;pyridoxal phosphate binding;structural constituent of nuclear pore	cellular_component;biological_process;molecular_function	PTHR10146	PYRIDOXAL PHOSPHATE HOMEOSTASIS PLP HOMEOSTASIS PROLINE SYNTHASE CO TRANSCRIBED BACTERIAL HOMOLOG PYRIDOXAL PHOSPHATE BINDING	GO:0003674;GO:0006810;GO:0006913;GO:0005198;GO:0043167;GO:0032991;GO:0005575	molecular_function;transport;nucleocytoplasmic transport;structural molecule activity;ion binding;protein-containing complex;cellular_component	00473+5.1.1.1
ENSONIG00000000512	choline/ethanolamine phosphotransferase 1	cept1b	83.5211	81.9202	1.0194	0.0277259	6.40978	0.0443489	0.833206	0.999804	1	protein_coding	ZDB-GENE-071004-33	100697159	I3IVL4	GO:0008654;GO:0016780;GO:0016020;GO:0016021;GO:0016740	phospholipid biosynthetic process;phosphotransferase activity, for other substituted phosphate groups;membrane;integral component of membrane;transferase activity	biological_process;molecular_function;cellular_component	PTHR10414	1 EC_2.7.8.1	GO:0005575;GO:0009058;GO:0006629	cellular_component;biosynthetic process;lipid metabolic process
ENSONIG00000000513	DEAD (Asp-Glu-Ala-Asp) box helicase 1	ddx1	67.9918	63.0379	1.07905	0.109762	6.04557	1.63727	0.2007	0.999804	1	protein_coding	ZDB-GENE-041001-215			GO:0005524;GO:0003676;GO:0005515	ATP binding;nucleic acid binding;protein binding	molecular_function	PTHR24031_SF211	ATP DEPENDENT RNA HELICASE DDX1 EC_3.6.4.13 DEAD BOX 1	GO:0003674;GO:0043167	molecular_function;ion binding
ENSONIG00000000514	salvador family WW domain containing protein 1	sav1	7.63183	6.3242	1.20231	0.265811	2.88976	1.65123	0.198791	0.999804	1	protein_coding	ZDB-GENE-040912-28	100702084	I3IVL6	GO:0042127;GO:0035329;GO:0032947;GO:0007165;GO:0006915;GO:0005515;GO:0060271	regulation of cell population proliferation;hippo signaling;protein-containing complex scaffold activity;signal transduction;apoptotic process;protein binding;cilium assembly	biological_process;molecular_function	PTHR10316_SF38	SALVADOR HOMOLOG 1.45 KDA WW DOMAIN	GO:0003674;GO:0008219;GO:0007165;GO:0005198;GO:0022607	molecular_function;cell death;signal transduction;structural molecule activity;cellular component assembly
ENSONIG00000000515	ubiquitin thioesterase ZRANB1	ZRANB1 (1 of many)	149.121	147.221	1.01307	0.0187392	7.23209	0.0544042	0.81557	0.999804	2	protein_coding		100705114	I3IVL8;I3IVL7	GO:0046872	metal ion binding	molecular_function	TF645663	UBIQUITIN THIOESTERASE ZRANB1 EC_3.4.19.12 ZINC FINGER RAN BINDING DOMAIN CONTAINING	GO:0003674;GO:0043167	molecular_function;ion binding
ENSONIG00000000516	ninein	nin	4.66311	4.29302	1.08285	0.114838	2.08271	0.144428	0.703918	0.999804	2	protein_coding	ZDB-GENE-070725-1	100702347		GO:0005813;GO:0034454;GO:0005509;GO:0001841;GO:0030917	centrosome;microtubule anchoring at centrosome;calcium ion binding;neural tube formation;midbrain-hindbrain boundary development	cellular_component;biological_process;molecular_function	PTHR18905	NINEIN	GO:0003674;GO:0043167;GO:0007010;GO:0005575;GO:0005815;GO:0048646;GO:0048856	molecular_function;ion binding;cytoskeleton organization;cellular_component;microtubule organizing center;anatomical structure formation involved in morphogenesis;anatomical structure development
ENSONIG00000000517	DNA damage regulated autophagy modulator 2	dram2b	12.5855	12.6601	-1.00461	-0.00663336	3.64766	0.00178712	0.96628	0.999804	1	protein_coding	ZDB-GENE-040625-141	100707726	I3IVM1	GO:0010506;GO:0016020;GO:0016021	regulation of autophagy;membrane;integral component of membrane	biological_process;cellular_component	PTHR21324	TRANSMEMBRANE	GO:0005575	cellular_component
ENSONIG00000000518	transmembrane p24 trafficking protein 4	tmed4	64.9054	66.4732	-1.0234	-0.0333682	6.05788	0.123163	0.725629	0.999804	1	protein_coding	ZDB-GENE-040625-140			GO:0016020;GO:0016021;GO:0005789	membrane;integral component of membrane;endoplasmic reticulum membrane	cellular_component	PTHR22811_SF38	TRANSMEMBRANE EMP24 DOMAIN CONTAINING PRECURSOR	GO:0005575	cellular_component
ENSONIG00000000519	abraxas 2, BRISC complex subunit	abraxas2	18.8793	17.3822	1.083	0.115028	4.20162	0.548415	0.458966	0.999804	1	protein_coding	ZDB-GENE-040426-2491						PTHR31728	BRCA1 A COMPLEX SUBUNIT ABRAXAS 1 COILED COIL DOMAIN CONTAINING 98 FAM175A
ENSONIG00000000520	inhibitor of kappa light polypeptide gene enhancer in B-cells, kinase gamma	ikbkg	60.7656	53.7487	1.13102	0.177623	5.87105	3.94076	0.0471294	0.999804	1	protein_coding	ZDB-GENE-050327-68			GO:0070530;GO:0007252;GO:0043123	K63-linked polyubiquitin modification-dependent protein binding;I-kappaB phosphorylation;positive regulation of I-kappaB kinase/NF-kappaB signaling	molecular_function;biological_process	PTHR31553	OPTINEURIN	GO:0003674;GO:0006464	molecular_function;cellular protein modification process
ENSONIG00000000521	linkage group 5 C6orf89 homolog	zgc:162255	53.8505	57.1786	-1.06261	-0.0876168	5.8098	0.284123	0.594012	0.999804	2	protein_coding	ZDB-GENE-070410-51	100697427	I3IVM5;I3IVM6	GO:0016020;GO:0016021	membrane;integral component of membrane	cellular_component	TF335525	BOMBESIN RECEPTOR ACTIVATED	GO:0005575	cellular_component
ENSONIG00000000522	EEF1A lysine methyltransferase 2	eef1akmt2	8.34187	8.24705	1.01315	0.0188531	3.12201	0.0120272	0.912672	0.999804	1	protein_coding	ZDB-GENE-050306-30		I3IVM7	GO:0008168;GO:0005634;GO:0016740;GO:0005737;GO:0032259;GO:0016279;GO:0018022	methyltransferase activity;nucleus;transferase activity;cytoplasm;methylation;protein-lysine N-methyltransferase activity;peptidyl-lysine methylation	molecular_function;cellular_component;biological_process	PTHR12843	LYSINE N METHYLTRANSFERASE EFM4 EC_2.1.1.- ELONGATION FACTOR METHYLTRANSFERASE 4 SECRETION AND EARLY ENDOCYTOSIS 1	GO:0008168;GO:0005575;GO:0043226;GO:0005634;GO:0005737;GO:0006464	methyltransferase activity;cellular_component;organelle;nucleus;cytoplasm;cellular protein modification process
ENSONIG00000000523	NFS1, cysteine desulfurase	nfs1	158.943	157.848	1.00689	0.00990435	7.34462	0.00868943	0.925731	0.999804	1	protein_coding	ZDB-GENE-060405-1	100697694	I3IVM8	GO:0044571;GO:0031071;GO:0030170;GO:0003824	[2Fe-2S] cluster assembly;cysteine desulfurase activity;pyridoxal phosphate binding;catalytic activity	biological_process;molecular_function	PTHR11601_SF20	CYSTEINE DESULFURASE MITOCHONDRIAL PRECURSOR EC_2.8.1.7	GO:0003674;GO:0043167;GO:0006790;GO:0022607;GO:0051186	molecular_function;ion binding;sulfur compound metabolic process;cellular component assembly;cofactor metabolic process	00730+2.8.1.7
ENSONIG00000000524	family with sequence similarity 53 member B	FAM53B	8.74476	8.04938	1.08431	0.116779	3.05074	0.514349	0.473262	0.999804	1	protein_coding							TF332095	AMBIGUOUS
ENSONIG00000000525	selenophosphate synthetase 2	sephs2	88.581	85.7655	1.034	0.0482299	6.47136	0.193904	0.659687	0.999804	1	protein_coding	ZDB-GENE-030327-5			GO:0016260;GO:0004756;GO:0005524;GO:0016310	selenocysteine biosynthetic process;selenide, water dikinase activity;ATP binding;phosphorylation	biological_process;molecular_function	PTHR10256	SELENIDE WATER DIKINASE EC_2.7.9.3 SELENIUM DONOR SELENOPHOSPHATE SYNTHASE	GO:0003674;GO:0043167;GO:0016301;GO:0009058;GO:0044281;GO:0006520	molecular_function;ion binding;kinase activity;biosynthetic process;small molecule metabolic process;cellular amino acid metabolic process	00450+2.7.9.3
ENSONIG00000000527			24.4285	24.0625	1.01494	0.0213978	4.59807	0.0236774	0.877709	0.999804	1	protein_coding				GO:0008146;GO:0016740	sulfotransferase activity;transferase activity	molecular_function	PTHR15723	CARBOHYDRATE SULFOTRANSFERASE 15 EC_2.8.2.33 B CELL RAG ASSOCIATED GENE N ACETYLGALACTOSAMINE 4 SULFATE 6 O SULFOTRANSFERASE GALNAC4S 6ST
ENSONIG00000000528	G-protein coupled receptor 26	gpr26	14.5958	13.228	1.09551	0.131604	3.88481	0.485353	0.486008	0.999804	1	protein_coding	ZDB-GENE-131121-131	100706706	I3IVN4	GO:0016021;GO:0007186;GO:0004930;GO:0016020	integral component of membrane;G protein-coupled receptor signaling pathway;G protein-coupled receptor activity;membrane	cellular_component;biological_process;molecular_function	PTHR24245	G COUPLED RECEPTOR	GO:0003674;GO:0007165;GO:0005575	molecular_function;signal transduction;cellular_component
ENSONIG00000000529	adaptor related protein complex 4 subunit beta 1	ap4b1	25.7808	26.5	-1.03028	-0.0430419	4.65615	0.0703771	0.790788	0.999804	1	protein_coding	ZDB-GENE-040426-1284		I3IVN5	GO:0030117;GO:0015031;GO:0016192;GO:0030276;GO:0006886;GO:0016020	membrane coat;protein transport;vesicle-mediated transport;clathrin binding;intracellular protein transport;membrane	cellular_component;biological_process;molecular_function	PTHR11134_SF4	AP 4 COMPLEX SUBUNIT BETA AP 4 ADAPTOR COMPLEX SUBUNIT BETA ADAPTOR RELATED COMPLEX 4 SUBUNIT BETA BETA SUBUNIT OF AP 4 BETA4 ADAPTIN	GO:0006810;GO:0003674;GO:0016192;GO:0032991;GO:0005575	transport;molecular_function;vesicle-mediated transport;protein-containing complex;cellular_component
ENSONIG00000000530	H6 family homeobox 2	hmx2	6.94048	7.44865	-1.0829	-0.114897	2.8076	0.251607	0.615946	0.999804	1	protein_coding	ZDB-GENE-080506-2	100699083	I3IVN6	GO:0043565;GO:0006355;GO:0003677;GO:0005634;GO:0042472;GO:0048916	sequence-specific DNA binding;regulation of transcription, DNA-templated;DNA binding;nucleus;inner ear morphogenesis;posterior lateral line development	molecular_function;biological_process;cellular_component	PTHR24325_SF18	HOMEOBOX HMX2 HOMEOBOX 2	GO:0003674;GO:0003677;GO:0005575;GO:0043226;GO:0005634;GO:0048856	molecular_function;DNA binding;cellular_component;organelle;nucleus;anatomical structure development
ENSONIG00000000531	abhydrolase domain containing 12B		2.88344	3.05395	-1.06538	-0.0913654	1.74117	0.0711687	0.789643	0.999804	1	protein_coding		100702618	I3IVN7	GO:0016020;GO:0016021	membrane;integral component of membrane	cellular_component	PTHR12277_SF49	ABHYDROLASE DOMAIN CONTAINING 12B	GO:0005575	cellular_component
ENSONIG00000000532	homeobox protein HMX3-A	hmx3a	8.9247	9.29817	-1.04708	-0.0663716	3.3385	0.140698	0.707588	0.999804	1	protein_coding	ZDB-GENE-001020-1	100699350	I3IVN8	GO:0043565;GO:0006355;GO:0003677;GO:0005634	sequence-specific DNA binding;regulation of transcription, DNA-templated;DNA binding;nucleus	molecular_function;biological_process;cellular_component	PTHR24325_SF19	HOMEOBOX HMX3 HOMEOBOX H6 FAMILY MEMBER 3 HOMEOBOX NKX 5 1	GO:0003674;GO:0003677;GO:0005575;GO:0043226;GO:0005634	molecular_function;DNA binding;cellular_component;organelle;nucleus
ENSONIG00000000533	zinc finger protein Pegasus	ikzf5	1.20159	1.53875	-1.25324	-0.325659	0.666332	0.877896	0.348778	0.999804	1	protein_coding	ZDB-GENE-040801-209	100699623	I3IVN9	GO:0003676;GO:0003140;GO:0007368;GO:0035469;GO:0071908	nucleic acid binding;determination of left/right asymmetry in lateral mesoderm;determination of left/right symmetry;determination of pancreatic left/right asymmetry;determination of intestine left/right asymmetry	molecular_function;biological_process	PTHR24387_SF7	ZINC FINGER PEGASUS IKAROS FAMILY ZINC FINGER 5	GO:0003674;GO:0048856	molecular_function;anatomical structure development
ENSONIG00000000534	phosphorylase, glycogen, liver	pygl	17.5259	19.0293	-1.08983	-0.124104	4.23574	0.447088	0.503721	0.999804	1	protein_coding	ZDB-GENE-041205-1			GO:0004645;GO:0008184;GO:0030170;GO:0005975;GO:0016740;GO:0016757;GO:0102250;GO:0102499	phosphorylase activity;glycogen phosphorylase activity;pyridoxal phosphate binding;carbohydrate metabolic process;transferase activity;transferase activity, transferring glycosyl groups;linear malto-oligosaccharide phosphorylase activity;SHG alpha-glucan phosphorylase activity	molecular_function;biological_process	PTHR11468	GLYCOGEN PHOSPHORYLASE EC_2.4.1.1	GO:0005975;GO:0003674;GO:0043167;GO:0016757	carbohydrate metabolic process;molecular_function;ion binding;transferase activity, transferring glycosyl groups	00500+2.4.1.1
ENSONIG00000000535	CUB and zona pellucida-like domains 1, tandem duplicate 1	cuzd1.1	51.7561	50.8595	1.01779	0.0254376	5.64976	0.0437032	0.834407	0.999804	1	protein_coding	ZDB-GENE-131122-16						PTHR22962_SF122	UNCHARACTERIZED
ENSONIG00000000536	intersectin 2	itsn2a	16.3271	15.3621	1.06422	0.0898008	3.96248	0.325983	0.568034	0.999804	2	protein_coding	ZDB-GENE-041014-84	100702517	I3IVP3;I3IVP2	GO:0005085;GO:0006897;GO:0035556;GO:0035023;GO:0005089;GO:0005509;GO:0005515	guanyl-nucleotide exchange factor activity;endocytosis;intracellular signal transduction;regulation of Rho protein signal transduction;Rho guanyl-nucleotide exchange factor activity;calcium ion binding;protein binding	molecular_function;biological_process	PTHR11216_SF29	INTERSECTIN 2 SH3 DOMAIN CONTAINING 1B	GO:0003674;GO:0043167;GO:0007165;GO:0006810;GO:0016192	molecular_function;ion binding;signal transduction;transport;vesicle-mediated transport
ENSONIG00000000537	angiotensinogen	agt	0.934424	1.37998	-1.47548	-0.561183	0.260982	0.194255	0.659398	0.999804	1	protein_coding	ZDB-GENE-030131-1205	100699886	I3IVP4	GO:0003081;GO:0005615	regulation of systemic arterial blood pressure by renin-angiotensin;extracellular space	biological_process;cellular_component	PTHR11461_SF13	ANGIOTENSINOGEN PRECURSOR SERPIN A8 [CONTAINS ANGIOTENSIN 1 ANGIOTENSIN 1 10 ANGIOTENSIN I ANG I ; ANGIOTENSIN 2 ANGIOTENSIN 1 8 ANGIOTENSIN II ANG II ; ANGIOTENSIN 3 ANGIOTENSIN 2 8 ANGIOTENSIN III ANG III DES ASP[1] ANGIOTENSIN II ; ANGIOTENSIN 4 ANGIOTENSIN 3 8 ANGIOTENSIN IV ANG IV ; ANGIOTENSIN 1 9; ANGIOTENSIN 1 7; ANGIOTENSIN 1 5; ANGIOTENSIN 1 4]	GO:0005575;GO:0005615	cellular_component;extracellular space
ENSONIG00000000538	copine 1	cpne1	72.5831	78.8358	-1.08609	-0.11914	6.44056	0.146801	0.701612	0.999804	1	protein_coding	ZDB-GENE-030131-3562	100697955	I3IVP5				PTHR10857_SF2	COPINE 1 COPINE I
ENSONIG00000000539	alpha-1,3-mannosyl-glycoprotein 4-beta-N-acetylglucosaminyltransferase C		2.8217	3.16971	-1.11537	-0.157527	1.51029	0.180377	0.67105	0.999804	1	protein_coding		100704471	I3IVP6				PTHR12062_SF0	ALPHA 1 3 MANNOSYL GLYCOPROTEIN 4 BETA N ACETYLGLUCOSAMINYLTRANSFERASE C EC_2.4.1.145 N GLYCOSYL OLIGOSACCHARIDE GLYCOPROTEIN N ACETYLGLUCOSAMINYLTRANSFERASE IVC GNT IVC N ACETYLGLUCOSAMINYLTRANSFERASE IVC UDP N ACETYLGLUCOSAMINE: ALPHA 1 3 D MANNOSIDE BETA 1 4 N ACETYLGLUCOSAMINYLTRANSFERASE IVC
ENSONIG00000000540	cyclin Q	ccnq	93.0914	93.5862	-1.00604	-0.00868429	6.56159	0.00798675	0.928789	0.999804	1	protein_coding	ZDB-GENE-050522-495	100705009	I3IVP7				PTHR10026_SF60	CYCLIN Q CDK10 ACTIVATING CYCLIN CYCLIN M CYCLIN RELATED FAM58A
ENSONIG00000000541	component of oligomeric golgi complex 2	cog2	37.2168	39.0348	-1.04892	-0.0689005	5.26898	0.455715	0.499634	0.999804	1	protein_coding	ZDB-GENE-040426-2671			GO:0007030;GO:0015031;GO:0016020	Golgi organization;protein transport;membrane	biological_process;cellular_component	PTHR12961	CONSERVED OLIGOMERIC GOLGI COMPLEX SUBUNIT 2 COG COMPLEX SUBUNIT 2 COMPONENT OF OLIGOMERIC GOLGI COMPLEX 2	GO:0005575;GO:0006810	cellular_component;transport
ENSONIG00000000542	signal recognition particle 19	srp19	58.5052	54.9692	1.06377	0.0891873	5.82705	0.529947	0.466629	0.999804	1	protein_coding	ZDB-GENE-040426-2657	100697287	I3IVP9	GO:0048500;GO:0006614;GO:0008312	signal recognition particle;SRP-dependent cotranslational protein targeting to membrane;7S RNA binding	cellular_component;biological_process;molecular_function	PTHR17453_SF0	SIGNAL RECOGNITION PARTICLE	GO:0003674;GO:0003723;GO:0006810;GO:0006605;GO:0032991;GO:0005575	molecular_function;RNA binding;transport;protein targeting;protein-containing complex;cellular_component
ENSONIG00000000543			184.266	170.554	1.0806	0.111833	7.42248	0.464104	0.495712	0.999804	1	protein_coding				GO:0005388;GO:0000166;GO:0070588;GO:0016021;GO:0005524;GO:0016020;GO:0006811;GO:0016787;GO:0006816;GO:0099132	calcium-transporting ATPase activity;nucleotide binding;calcium ion transmembrane transport;integral component of membrane;ATP binding;membrane;ion transport;hydrolase activity;calcium ion transport;ATP hydrolysis coupled cation transmembrane transport	molecular_function;biological_process;cellular_component	PTHR24093_SF243	CALCIUM TRANSPORTING ATPASE EC_3.6.3.8	GO:0005575;GO:0003674;GO:0043167;GO:0006810;GO:0055085;GO:0022857;GO:0016887	cellular_component;molecular_function;ion binding;transport;transmembrane transport;transmembrane transporter activity;ATPase activity
ENSONIG00000000544			12.0082	11.5489	1.04477	0.0631848	3.53488	0.102732	0.748575	0.999804	1	protein_coding				GO:0005515	protein binding	molecular_function	PTHR15599	RADIAL SPOKE HEAD 14 HOMOLOG RHABDOID TUMOR DELETION REGION 1	GO:0003674	molecular_function
ENSONIG00000000545	piggyBac transposable element derived 5	pgbd5	22.6072	21.4525	1.05358	0.0753011	4.50493	0.241728	0.622961	0.999804	1	protein_coding	ZDB-GENE-040724-229	100700429	I3IVQ2				TF332005	PIGGYBAC TRANSPOSABLE ELEMENT DERIVED 5 EC_3.1.-.- PIGGYBAC TRANSPOSASE 5
ENSONIG00000000546			165.721	171.433	-1.03468	-0.0491835	7.36549	0.178652	0.672534	0.999804	2	protein_coding				GO:0007010;GO:0003779	cytoskeleton organization;actin binding	biological_process;molecular_function	PTHR24213	ACTIN BINDING LIM ABLIM ACTIN BINDING LIM FAMILY MEMBER	GO:0003674;GO:0008092;GO:0007010	molecular_function;cytoskeletal protein binding;cytoskeleton organization
ENSONIG00000000547	progesterone immunomodulatory binding factor 1	pibf1	10.7919	11.7591	-1.08589	-0.118875	3.44335	0.532706	0.465472	0.999804	1	protein_coding	ZDB-GENE-040801-94		I3IVQ5	GO:0003700;GO:0003676;GO:0006355	DNA-binding transcription factor activity;nucleic acid binding;regulation of transcription, DNA-templated	molecular_function;biological_process	PTHR23223_SF144	KRUEPPEL FACTOR 5 BASIC TRANSCRIPTION ELEMENT BINDING 2 BTE BINDING 2 INTESTINAL ENRICHED KRUEPPEL FACTOR TRANSCRIPTION FACTOR BTEB2	GO:0003674;GO:0003700	molecular_function;DNA-binding transcription factor activity
ENSONIG00000000548	fer-1-like family member 4	fer1l4	2.81747	2.07205	1.34773	0.430536	1.14349	1.06332	0.30246	0.999804	1	protein_coding	ZDB-GENE-130530-815			GO:0016021;GO:0016020	integral component of membrane;membrane	cellular_component	PTHR12546_SF36	FER 1 4	GO:0005575	cellular_component
ENSONIG00000000549	tripartite motif containing 9	trim9	85.2305	77.0331	1.10629	0.145728	6.36606	1.72615	0.188903	0.999804	2	protein_coding	ZDB-GENE-030131-8043			GO:0035544;GO:0004842;GO:0008270;GO:0005622;GO:0005515;GO:0046872;GO:0016567	negative regulation of SNARE complex assembly;ubiquitin-protein transferase activity;zinc ion binding;intracellular;protein binding;metal ion binding;protein ubiquitination	biological_process;molecular_function;cellular_component	PTHR24103_SF289	E3 UBIQUITIN LIGASE TRIM9 EC_2.3.2.27 RING TYPE E3 UBIQUITIN TRANSFERASE TRIM9 TRIPARTITE MOTIF CONTAINING 9	GO:0003674;GO:0005575;GO:0005622;GO:0043167;GO:0006464	molecular_function;cellular_component;intracellular;ion binding;cellular protein modification process
ENSONIG00000000550	progesterone immunomodulatory binding factor 1	pibf1	5.90714	5.47945	1.07222	0.100607	2.4962	0.173917	0.676654	0.999804	1	protein_coding	ZDB-GENE-040801-94						PTHR18950	PROGESTERONE INDUCED BLOCKING FACTOR 1 PIBF CENTROSOMAL OF 90 KDA CEP90
ENSONIG00000000551	si:ch73-21k16.5	si:ch73-21k16.5	4.21943	7.28591	-1.72705	-0.788313	2.34064	0.347471	0.555548	0.999804	1	protein_coding	ZDB-GENE-030131-8374			GO:0044255;GO:0008374;GO:0016746;GO:0016740	cellular lipid metabolic process;O-acyltransferase activity;transferase activity, transferring acyl groups;transferase activity	biological_process;molecular_function	PTHR12563	GLYCEROL 3 PHOSPHATE ACYLTRANSFERASE 1 MITOCHONDRIAL PRECURSOR GPAT 1 EC_2.3.1.15	GO:0016746;GO:0006629	transferase activity, transferring acyl groups;lipid metabolic process	00564+2.3.1.15;00561+2.3.1.15
ENSONIG00000000552	un-named sa1614	unm_sa1614	4.71321	5.62276	-1.19367	-0.255406	2.35251	0.601529	0.437995	0.999804	1	protein_coding	ZDB-GENE-120411-1			GO:0043547;GO:0005096;GO:0005515;GO:0046872	positive regulation of GTPase activity;GTPase activator activity;protein binding;metal ion binding	biological_process;molecular_function	PTHR23180_SF231	UNCHARACTERIZED	GO:0003674;GO:0030234;GO:0043167	molecular_function;enzyme regulator activity;ion binding
ENSONIG00000000553	thioredoxin-related transmembrane protein 1	tmx1	20.6877	19.3786	1.06699	0.0935478	4.39968	0.369448	0.543305	0.999804	1	protein_coding	ZDB-GENE-030131-2327			GO:0045454;GO:0016020;GO:0016021;GO:0005623	cell redox homeostasis;membrane;integral component of membrane;cell	biological_process;cellular_component	PTHR18929_SF67	THIOREDOXIN RELATED TRANSMEMBRANE 1 PRECURSOR THIOREDOXIN DOMAIN CONTAINING 1	GO:0042592;GO:0005575;GO:0005623	homeostatic process;cellular_component;cell
ENSONIG00000000554	lipin 1	si:ch73-21k16.1	12.3535	13.1067	-1.05481	-0.0769816	3.69685	0.203996	0.651515	0.999804	2	protein_coding	ZDB-GENE-081031-51	100703868	I3IVR3;I3IVR4	GO:0019432;GO:0008195;GO:0009062;GO:0006357;GO:0016311	triglyceride biosynthetic process;phosphatidate phosphatase activity;fatty acid catabolic process;regulation of transcription by RNA polymerase II;dephosphorylation	biological_process;molecular_function	PTHR12181_SF10	PHOSPHATIDATE PHOSPHATASE LPIN1 EC_3.1.3.4 LIPIN 1	GO:0016791;GO:0044281;GO:0009056;GO:0006629;GO:0009058	phosphatase activity;small molecule metabolic process;catabolic process;lipid metabolic process;biosynthetic process	00565+3.1.3.4;00600+3.1.3.4;00561+3.1.3.4;00564+3.1.3.4
ENSONIG00000000555	DIS3 exosome endoribonuclease and 3'-5' exoribonuclease	dis3	6.34849	5.83653	1.0875	0.121017	2.6186	0.240726	0.623682	0.999804	1	protein_coding	ZDB-GENE-080213-3			GO:0004540;GO:0003723;GO:0090501	ribonuclease activity;RNA binding;RNA phosphodiester bond hydrolysis	molecular_function;biological_process	PTHR23355	DIS3 EXONUCLEASE EC_3.1.13.-	GO:0003674;GO:0003723;GO:0004518;GO:0034641	molecular_function;RNA binding;nuclease activity;cellular nitrogen compound metabolic process
ENSONIG00000000556	FERM domain containing 6	frmd6	21.5114	21.719	-1.0059	-0.00849043	4.44373	0.00296448	0.956579	0.999804	2	protein_coding	ZDB-GENE-050522-354			GO:0005856	cytoskeleton	cellular_component	PTHR23280_SF9	FERM DOMAIN CONTAINING 6	GO:0005575;GO:0043226;GO:0005856	cellular_component;organelle;cytoskeleton
ENSONIG00000000558	ras-related protein Rab-14		9.08936	9.95159	-1.09418	-0.129848	3.2301	0.735761	0.391022	0.999804	1	protein_coding		100697822	I3IVR9	GO:0055037;GO:0045335;GO:0005802;GO:0090382;GO:0032456;GO:0042742;GO:0003924;GO:0006895;GO:0005525;GO:0005829	recycling endosome;phagocytic vesicle;trans-Golgi network;phagosome maturation;endocytic recycling;defense response to bacterium;GTPase activity;Golgi to endosome transport;GTP binding;cytosol	cellular_component;biological_process;molecular_function	PTHR24073_SF185	RAS RELATED RAB 14	GO:0003674;GO:0043167;GO:0006810;GO:0016192;GO:0003924;GO:0006950;GO:0005575;GO:0043226;GO:0031410;GO:0005768;GO:0005829	molecular_function;ion binding;transport;vesicle-mediated transport;GTPase activity;response to stress;cellular_component;organelle;cytoplasmic vesicle;endosome;cytosol
ENSONIG00000000559	G protein subunit gamma 2	gng2	51.7944	49.587	1.04327	0.0611105	5.67425	0.363678	0.54647	0.999804	1	protein_coding	ZDB-GENE-050417-59	100695642	I3IVS0	GO:0005834;GO:0003924;GO:0007186;GO:0016020;GO:0007165;GO:0005886;GO:0002040;GO:0048010;GO:0005829	heterotrimeric G-protein complex;GTPase activity;G protein-coupled receptor signaling pathway;membrane;signal transduction;plasma membrane;sprouting angiogenesis;vascular endothelial growth factor receptor signaling pathway;cytosol	cellular_component;molecular_function;biological_process	PTHR13809	GUANINE NUCLEOTIDE BINDING SUBUNIT GAMMA	GO:0007165;GO:0003924;GO:0032991;GO:0005575;GO:0005886;GO:0048646;GO:0005829	signal transduction;GTPase activity;protein-containing complex;cellular_component;plasma membrane;anatomical structure formation involved in morphogenesis;cytosol
ENSONIG00000000560	MAK16 homolog	mak16	82.7204	85.9458	-1.03923	-0.0555208	6.39404	0.346882	0.555883	0.999804	1	protein_coding	ZDB-GENE-020419-35	100698088	I3IVS1	GO:0005634;GO:0005730	nucleus;nucleolus	cellular_component	PTHR23405	MAK16	GO:0005575;GO:0043226;GO:0005634;GO:0005730	cellular_component;organelle;nucleus;nucleolus
ENSONIG00000000561	dual specificity phosphatase 23	dusp23a	7.15848	7.68134	-1.07804	-0.108406	2.90813	0.265287	0.606511	0.999804	1	protein_coding	ZDB-GENE-030131-2554	100695911	I3IVS2	GO:0008138;GO:0016791;GO:0016311;GO:0006470;GO:0004725;GO:0035335	protein tyrosine/serine/threonine phosphatase activity;phosphatase activity;dephosphorylation;protein dephosphorylation;protein tyrosine phosphatase activity;peptidyl-tyrosine dephosphorylation	molecular_function;biological_process	TF616858	DUAL SPECIFICITY PHOSPHATASE 23 EC_3.1.3.16 EC_3.1.3.- 48 LOW MOLECULAR MASS DUAL SPECIFICITY PHOSPHATASE 3 LDP 3	GO:0016791;GO:0006464	phosphatase activity;cellular protein modification process
ENSONIG00000000562	organic cation transporter 2	2002-10-01	0.627678	0.702762	-1.10216	-0.140331	-0.50027	0.0289242	0.864954	0.999804	2	protein_coding	ZDB-GENE-080204-92			GO:0055085;GO:0022857;GO:0016021;GO:0016020	transmembrane transport;transmembrane transporter activity;integral component of membrane;membrane	biological_process;molecular_function;cellular_component	PTHR24064_SF173	SOLUTE CARRIER FAMILY 22 MEMBER 2 ORGANIC CATION TRANSPORTER 2	GO:0005575;GO:0022857;GO:0003674;GO:0006810;GO:0055085	cellular_component;transmembrane transporter activity;molecular_function;transport;transmembrane transport
ENSONIG00000000563	bora, aurora kinase A activator	bora	0.975759	0.904617	1.13373	0.181082	-0.0144088	0.111203	0.738779	0.999804	1	protein_coding	ZDB-GENE-041114-165						PTHR14728	AURORA BOREALIS
ENSONIG00000000565	ST3 beta-galactoside alpha-2,3-sialyltransferase 8	st3gal8	8.70374	8.65548	1.00563	0.00809814	3.0256	0.00157938	0.968299	0.999804	1	protein_coding	ZDB-GENE-050417-286			GO:0006486;GO:0008373;GO:0016020;GO:0016021;GO:0016740;GO:0016757;GO:0005794;GO:0097503	protein glycosylation;sialyltransferase activity;membrane;integral component of membrane;transferase activity;transferase activity, transferring glycosyl groups;Golgi apparatus;sialylation	biological_process;molecular_function;cellular_component	PTHR13713_SF32	ST3 BETA GALACTOSIDE ALPHA 2 3 SIALYLTRANSFERASE	GO:0016757;GO:0006464;GO:0005575;GO:0043226;GO:0005794	transferase activity, transferring glycosyl groups;cellular protein modification process;cellular_component;organelle;Golgi apparatus
ENSONIG00000000566	spindlin-1	spina	162.06	159.202	1.0186	0.026588	7.32912	0.0756179	0.783326	0.999804	1	protein_coding	ZDB-GENE-161230-18	100698355	I3IVS8	GO:0007276	gamete generation	biological_process	PTHR10405	SPINDLIN
ENSONIG00000000567	human immunodeficiency virus type I enhancer binding protein 2b	hivep2b	142.366	132.505	1.0742	0.103263	7.13758	1.22591	0.268203	0.999804	1	protein_coding	ZDB-GENE-130530-562			GO:0003676	nucleic acid binding	molecular_function	PTHR23233_SF53	HUMAN IMMUNODEFICIENCY VIRUS TYPE I ENHANCER BINDING 2 HOMOLOG MYC INTRON BINDING 1 MIBP 1	GO:0003674	molecular_function
ENSONIG00000000568	dachshund homolog 1	dachc	19.2551	21.5477	-1.11762	-0.160434	4.37687	1.0011	0.317045	0.999804	2	protein_coding	ZDB-GENE-020402-5	100700465	I3IVT1;I3IVT0				PTHR12577	DACHSHUND HOMOLOG
ENSONIG00000000569	alpha-L-fucosidase 2	fuca2	45.5813	48.9257	-1.07237	-0.100801	5.57487	0.569046	0.450638	0.999804	1	protein_coding	ZDB-GENE-040822-39			GO:0006004;GO:0004560;GO:0005975;GO:0016787;GO:0016798;GO:0008152	fucose metabolic process;alpha-L-fucosidase activity;carbohydrate metabolic process;hydrolase activity;hydrolase activity, acting on glycosyl bonds;metabolic process	biological_process;molecular_function	PTHR10030	TISSUE ALPHA L FUCOSIDASE PRECURSOR EC_3.2.1.51 ALPHA L FUCOSIDASE I ALPHA L FUCOSIDE FUCOHYDROLASE 1 ALPHA L FUCOSIDASE 1	GO:0005975;GO:0016798;GO:0044281;GO:0008150	carbohydrate metabolic process;hydrolase activity, acting on glycosyl bonds;small molecule metabolic process;biological_process	00511+3.2.1.51
ENSONIG00000000570	G-patch domain containing 2	si:ch73-21k16.4	17.5065	18.3795	-1.04969	-0.069966	4.19826	0.181113	0.670419	0.999804	2	protein_coding	ZDB-GENE-081031-96	100704138	I3IVT4;I3IVT3	GO:0003676	nucleic acid binding	molecular_function	PTHR14195	G PATCH DOMAIN CONTAINING 2	GO:0003674	molecular_function
ENSONIG00000000571			3.12236	3.55328	-1.13104	-0.177655	1.78724	0.347465	0.555552	0.999804	1	protein_coding				GO:0031072;GO:0051082	heat shock protein binding;unfolded protein binding	molecular_function	PTHR15852_SF11	SSUH2 HOMOLOG SSU 2 HOMOLOG	GO:0003674;GO:0051082	molecular_function;unfolded protein binding
ENSONIG00000000572	si:ch211-87m7.2	si:ch211-87m7.2	16.3118	17.2692	-1.06005	-0.084135	4.11891	0.426249	0.513835	0.999804	1	protein_coding	ZDB-GENE-120215-153			GO:0005215;GO:0055085;GO:0016021;GO:0016020	transporter activity;transmembrane transport;integral component of membrane;membrane	molecular_function;biological_process;cellular_component	PTHR24003_SF510	HIPPOCAMPUS ABUNDANT TRANSCRIPT 1 MAJOR FACILITATOR SUPERFAMILY DOMAIN CONTAINING 14B	GO:0005575;GO:0006810;GO:0055085;GO:0003674	cellular_component;transport;transmembrane transport;molecular_function
ENSONIG00000000573	estrogen-related receptor gamma	esrrgb	4.59367	5.34421	-1.15822	-0.211906	2.34152	0.566077	0.451822	0.999804	2	protein_coding	ZDB-GENE-040616-4	100695726	I3IVT7;I3IVT8	GO:0005496;GO:0003707;GO:0008270;GO:0043565;GO:0003700;GO:0005634;GO:0006355;GO:0003677;GO:0046872;GO:0043401;GO:0032475;GO:0071599	steroid binding;steroid hormone receptor activity;zinc ion binding;sequence-specific DNA binding;DNA-binding transcription factor activity;nucleus;regulation of transcription, DNA-templated;DNA binding;metal ion binding;steroid hormone mediated signaling pathway;otolith formation;otic vesicle development	molecular_function;cellular_component;biological_process	PTHR24084_SF23	STEROID HORMONE RECEPTOR ERR2 ESTROGEN RECEPTOR 2 ESTROGEN RELATED RECEPTOR BETA ERR BETA NUCLEAR RECEPTOR SUBFAMILY 3 GROUP B MEMBER 2	GO:0003674;GO:0003677;GO:0005575;GO:0043226;GO:0005634;GO:0003700;GO:0043167;GO:0008289;GO:0007165;GO:0048856;GO:0048646	molecular_function;DNA binding;cellular_component;organelle;nucleus;DNA-binding transcription factor activity;ion binding;lipid binding;signal transduction;anatomical structure development;anatomical structure formation involved in morphogenesis
ENSONIG00000000575	atypical kinase COQ8A, mitochondrial	si:dkey-36g24.3	12.8011	12.1938	1.04768	0.0671916	3.68143	0.15203	0.696603	0.999804	1	protein_coding	ZDB-GENE-030131-5543	100703968	I3IVU0				PTHR10566_SF21	ATYPICAL KINASE COQ8A MITOCHONDRIAL PRECURSOR EC_2.7.-.- CHAPERONE ACTIVITY OF BC1 COMPLEX CHAPERONE ABC1 COENZYME Q 8A AARF DOMAIN CONTAINING KINASE 3
ENSONIG00000000577	purine nucleoside phosphorylase 4a	pnp4a	1.8833	2.24296	-1.20536	-0.269469	1.28621	0.584799	0.444437	0.999804	1	protein_coding	ZDB-GENE-040625-83			GO:0016763;GO:0004731;GO:0009116;GO:0006139;GO:0003824;GO:0016740;GO:0016757	transferase activity, transferring pentosyl groups;purine-nucleoside phosphorylase activity;nucleoside metabolic process;nucleobase-containing compound metabolic process;catalytic activity;transferase activity;transferase activity, transferring glycosyl groups	molecular_function;biological_process	PTHR11904	S METHYL 5' THIOADENOSINE PHOSPHORYLASE EC_2.4.2.28 5' METHYLTHIOADENOSINE PHOSPHORYLASE MTA PHOSPHORYLASE MTAP MTAPASE	GO:0003674;GO:0034641;GO:0044281;GO:0016757	molecular_function;cellular nitrogen compound metabolic process;small molecule metabolic process;transferase activity, transferring glycosyl groups	00230+2.4.2.1;00760+2.4.2.1;00240+2.4.2.1
ENSONIG00000000579	UBA domain containing 2	ubac2	32.7827	30.7642	1.06452	0.0902001	5.00585	0.397593	0.528335	0.999804	1	protein_coding	ZDB-GENE-070112-2122	100701243	I3IVU5	GO:0005515;GO:0016020;GO:0016021	protein binding;membrane;integral component of membrane	molecular_function;cellular_component	PTHR12917	DNA DAMAGE INDUCIBLE 1 EC_3.4.23.-	GO:0003674;GO:0005575	molecular_function;cellular_component
ENSONIG00000000581	si:ch211-57i17.1	si:ch211-57i17.1	49.9055	49.723	1.00393	0.00565411	5.64233	0.0026798	0.958714	0.999804	1	protein_coding	ZDB-GENE-041014-259						PTHR12394	FASCICULATION AND ELONGATION ZETA ZYGIN ZYGIN
ENSONIG00000000582	tribbles homolog 2	trib3	3.65484	3.55666	1.03761	0.0532615	1.91765	0.0376216	0.846205	0.999804	1	protein_coding	ZDB-GENE-040426-2609	100700105	I3IVU8	GO:0003714;GO:0006468;GO:0004672;GO:0005524;GO:0001947;GO:0007368;GO:1903507	transcription corepressor activity;protein phosphorylation;protein kinase activity;ATP binding;heart looping;determination of left/right symmetry;negative regulation of nucleic acid-templated transcription	molecular_function;biological_process	PTHR22961	TRIBBLES HOMOLOG TRB	GO:0003674;GO:0043167;GO:0016301;GO:0006464;GO:0048856	molecular_function;ion binding;kinase activity;cellular protein modification process;anatomical structure development
ENSONIG00000000583	ankyrin 3a	ank3a	289.007	285.227	1.01327	0.0190228	8.08403	0.0175402	0.894637	0.999804	1	protein_coding	ZDB-GENE-060621-1			GO:0007165;GO:0005515	signal transduction;protein binding	biological_process;molecular_function	PTHR24123_SF15	ANKYRIN 3 ANK 3 ANKYRIN G	GO:0003674;GO:0007165	molecular_function;signal transduction
ENSONIG00000000584			4.70739	4.47584	1.05377	0.0755603	2.2248	0.102501	0.748848	0.999804	1	protein_coding				GO:0000077	DNA damage checkpoint	biological_process	TF641943	ATR INTERACTING	GO:0006950	response to stress
ENSONIG00000000585	nudix hydrolase 18	nudt18	9.2771	8.71756	1.0625	0.0874596	3.1751	0.190034	0.662888	0.999804	1	protein_coding	ZDB-GENE-050417-388	100701859	I3IVV1	GO:0016787	hydrolase activity	molecular_function	PTHR22769_SF16	8 OXO DGDP PHOSPHATASE NUDT18 EC_3.6.1.58 2 HYDROXY DADP PHOSPHATASE 7 8 DIHYDRO 8 OXOGUANINE PHOSPHATASE MUTT HOMOLOG 3 NUCLEOSIDE DIPHOSPHATE LINKED MOIETY X MOTIF 18 NUDIX MOTIF 18
ENSONIG00000000587	si:dkey-3k24.5	si:dkey-3k24.5	1.79329	2.26614	-1.2508	-0.322851	1.05946	0.838883	0.359717	0.999804	1	protein_coding	ZDB-GENE-111102-3			GO:0042127	regulation of cell population proliferation	biological_process	PTHR16096	UNCHARACTERIZED
ENSONIG00000000588	WD repeat-containing protein 26	wdr26b	62.9898	64.0878	-1.01705	-0.0243865	6.10373	0.00235015	0.961335	0.999804	2	protein_coding	ZDB-GENE-041014-277	100704673	I3IVV5;I3IVV4	GO:0005515	protein binding	molecular_function	PTHR22838	WD REPEAT CONTAINING	GO:0003674	molecular_function
ENSONIG00000000589	excision repair cross-complementation group 6-like	ercc6l	1.95985	1.67983	1.15783	0.211426	0.898301	0.269162	0.603895	0.999804	1	protein_coding	ZDB-GENE-060531-56			GO:0005524;GO:0005515	ATP binding;protein binding	molecular_function	PTHR10799_SF67	DNA EXCISION REPAIR ERCC 6 EC_3.6.4.12 ATP DEPENDENT HELICASE ERCC6	GO:0003674;GO:0043167	molecular_function;ion binding
ENSONIG00000000590	oxoglutarate (alpha-ketoglutarate) dehydrogenase b (lipoamide)	ogdhb	136.406	139.084	-1.01886	-0.026951	7.07137	0.0718356	0.788683	0.999804	2	protein_coding	ZDB-GENE-090311-8			GO:0006099;GO:0030976;GO:0004591;GO:0016624;GO:0055114	tricarboxylic acid cycle;thiamine pyrophosphate binding;oxoglutarate dehydrogenase (succinyl-transferring) activity;oxidoreductase activity, acting on the aldehyde or oxo group of donors, disulfide as acceptor;oxidation-reduction process	biological_process;molecular_function	PTHR23152	2 OXOGLUTARATE DEHYDROGENASE MITOCHONDRIAL PRECURSOR EC_1.2.4.2 2 OXOGLUTARATE DEHYDROGENASE COMPLEX COMPONENT E1 OGDC E1 ALPHA KETOGLUTARATE DEHYDROGENASE	GO:0003674;GO:0043167;GO:0044281	molecular_function;ion binding;small molecule metabolic process	00380+1.2.4.2;00310+1.2.4.2;00020+1.2.4.2
ENSONIG00000000591			20.4956	19.5863	1.04701	0.0662736	4.35774	0.109016	0.741267	0.999804	1	protein_coding				GO:0006355;GO:0003677;GO:0046983;GO:0005634	regulation of transcription, DNA-templated;DNA binding;protein dimerization activity;nucleus	biological_process;molecular_function;cellular_component	PTHR10985_SF75	HAIRY AND ENHANCER OF SPLIT 5	GO:0003674;GO:0003677;GO:0005575;GO:0043226;GO:0005634	molecular_function;DNA binding;cellular_component;organelle;nucleus
ENSONIG00000000592			1.12644	1.24889	-1.09517	-0.131161	0.467333	0.105675	0.745123	0.999804	1	protein_coding				GO:0046983	protein dimerization activity	molecular_function	PTHR10985_SF75	HAIRY AND ENHANCER OF SPLIT 5	GO:0003674	molecular_function
ENSONIG00000000593	galactose-3-O-sulfotransferase 4	gal3st4	19.2871	19.5922	-1.01439	-0.0206097	4.28536	0.023315	0.878641	0.999804	1	protein_coding	ZDB-GENE-080408-1			GO:0009247;GO:0001733;GO:0016021;GO:0005794	glycolipid biosynthetic process;galactosylceramide sulfotransferase activity;integral component of membrane;Golgi apparatus	biological_process;molecular_function;cellular_component	PTHR14647	GALACTOSE 3 O SULFOTRANSFERASE GAL3ST EC_2.8.2.- BETA GALACTOSE 3 O SULFOTRANSFERASE GAL BETA 1 3 GALNAC 3' SULFOTRANSFERASE	GO:0005575;GO:0043226;GO:0005794;GO:0009058;GO:0006629	cellular_component;organelle;Golgi apparatus;biosynthetic process;lipid metabolic process
ENSONIG00000000594	pantothenate kinase 4	pank4	25.0806	24.5044	1.02468	0.0351784	4.57382	0.055705	0.813418	0.999804	1	protein_coding	ZDB-GENE-040426-1592	100701191	I3IVW2	GO:0015937;GO:0004594;GO:0005524;GO:0016740;GO:0000166;GO:0016301;GO:0016310	coenzyme A biosynthetic process;pantothenate kinase activity;ATP binding;transferase activity;nucleotide binding;kinase activity;phosphorylation	biological_process;molecular_function	PTHR12280_SF20	PANTOTHENATE KINASE EC_2.7.1.33 PANTOTHENIC ACID KINASE	GO:0003674;GO:0043167;GO:0016301;GO:0009058;GO:0044281;GO:0034641;GO:0051186	molecular_function;ion binding;kinase activity;biosynthetic process;small molecule metabolic process;cellular nitrogen compound metabolic process;cofactor metabolic process	00770+2.7.1.33
ENSONIG00000000595	lysophosphatidic acid receptor 6	zgc:172079	1.04527	0.592665	1.80761	0.854084	0.174464	1.80514	0.179092	0.999804	1	protein_coding	ZDB-GENE-080204-103	100695710		GO:0016021;GO:0007186;GO:0004930;GO:0016020;GO:0007165	integral component of membrane;G protein-coupled receptor signaling pathway;G protein-coupled receptor activity;membrane;signal transduction	cellular_component;biological_process;molecular_function	PTHR24232	RECEPTOR	GO:0003674;GO:0007165;GO:0005575	molecular_function;signal transduction;cellular_component
ENSONIG00000000596	metallo-beta-lactamase domain containing 1	mblac1	12.2761	11.9675	1.02171	0.0309885	3.58488	0.0382164	0.845009	0.999804	2	protein_coding	ZDB-GENE-111102-2	100695976	I3IVW4;I3IVW5				PTHR23200_SF37	METALLO BETA LACTAMASE DOMAIN CONTAINING 1 EC 3
ENSONIG00000000597	DnaJ (Hsp40) homolog, subfamily C, member 5 gamma b	dnajc5gb	5.05669	5.99886	-1.18996	-0.250908	2.48979	1.03948	0.307943	0.999804	1	protein_coding	ZDB-GENE-040426-1238						PTHR24078_SF31	AMBIGUOUS
ENSONIG00000000598	mannose-P-dolichol utilization defect 1	MPDU1	67.5795	70.8078	-1.04791	-0.0675181	6.1264	0.495705	0.481394	0.999804	1	protein_coding		100696236	I3IVW7	GO:0016020;GO:0016021	membrane;integral component of membrane	cellular_component	PTHR12226	MANNOSE P DOLICHOL UTILIZATION DEFECT 1 SUPPRESSOR OF LEC15 AND LEC35 GLYCOSYLATION MUTATION SL15	GO:0005575	cellular_component
ENSONIG00000000599	adenylate cyclase type 3	adcy3b	11.7623	10.8772	1.08428	0.116734	3.63614	0.280038	0.596677	0.999804	3	protein_coding	ZDB-GENE-041014-276	100704945	I3IVW8;I3IVW9;I3IVX0	GO:0005886;GO:0006171;GO:0004016;GO:0009190;GO:0016849;GO:0035556;GO:0016020;GO:0016021;GO:0000166;GO:0005524;GO:0046872;GO:0016829	plasma membrane;cAMP biosynthetic process;adenylate cyclase activity;cyclic nucleotide biosynthetic process;phosphorus-oxygen lyase activity;intracellular signal transduction;membrane;integral component of membrane;nucleotide binding;ATP binding;metal ion binding;lyase activity	cellular_component;biological_process;molecular_function	PTHR11920_SF221	ADENYLATE CYCLASE TYPE 3 EC_4.6.1.1 ATP PYROPHOSPHATE LYASE 3 ADENYLATE CYCLASE TYPE III AC III ADENYLATE CYCLASE OLFACTIVE TYPE ADENYLYL CYCLASE 3 AC3	GO:0007165;GO:0016829;GO:0009058;GO:0044281;GO:0034641;GO:0005575;GO:0005886;GO:0003674;GO:0043167	signal transduction;lyase activity;biosynthetic process;small molecule metabolic process;cellular nitrogen compound metabolic process;cellular_component;plasma membrane;molecular_function;ion binding	00230+4.6.1.1
ENSONIG00000000600	tumor protein p53 inducible protein 3	TP53I3	0.536649	0.447324	1.16957	0.22598	-0.789786	0.0479212	0.826721	0.999804	1	protein_coding		100704508	I3IVX1	GO:0055114;GO:0016491	oxidation-reduction process;oxidoreductase activity	biological_process;molecular_function	PTHR11695_SF28	QUINONE OXIDOREDUCTASE PIG3 EC 1 TUMOR P53 INDUCIBLE 3 P53 INDUCED GENE 3	GO:0016491	oxidoreductase activity
ENSONIG00000000601	centromere protein O	cenpo	5.55816	7.32792	-1.31407	-0.394047	2.69195	2.67451	0.101967	0.999804	3	protein_coding	ZDB-GENE-070928-16	100696703	I3IVX4;I3IVX2;I3IVX3	GO:0000776;GO:0034508	kinetochore;centromere complex assembly	cellular_component;biological_process	PTHR14582	CENTROMERE O CENP O	GO:0051276;GO:0022607;GO:0065003;GO:0032991;GO:0005575;GO:0043226	chromosome organization;cellular component assembly;protein-containing complex assembly;protein-containing complex;cellular_component;organelle
ENSONIG00000000602	SRY (sex determining region Y)-box 19b	sox19b	44.4867	51.1059	-1.14805	-0.199182	5.56597	3.0393	0.0812709	0.999804	2	protein_coding	ZDB-GENE-010111-1			GO:0006355;GO:0003677;GO:0005634	regulation of transcription, DNA-templated;DNA binding;nucleus	biological_process;molecular_function;cellular_component	PTHR10270_SF38	TRANSCRIPTION FACTOR SOX	GO:0003674;GO:0003677;GO:0005575;GO:0043226;GO:0005634	molecular_function;DNA binding;cellular_component;organelle;nucleus
ENSONIG00000000603	alpha-N-acetylgalactosaminidase	naga	25.5653	26.4065	-1.03517	-0.0498696	4.6871	0.153927	0.694811	0.999804	1	protein_coding	ZDB-GENE-051113-256	100703787	I3IVX7	GO:0004553;GO:0005975;GO:0003824;GO:0016787;GO:0016798;GO:0008152	hydrolase activity, hydrolyzing O-glycosyl compounds;carbohydrate metabolic process;catalytic activity;hydrolase activity;hydrolase activity, acting on glycosyl bonds;metabolic process	molecular_function;biological_process	PTHR11452	ALPHA GALACTOSIDASE PRECURSOR EC_3.2.1.22 MELIBIASE	GO:0003674;GO:0005975;GO:0016798;GO:0008150	molecular_function;carbohydrate metabolic process;hydrolase activity, acting on glycosyl bonds;biological_process	00052+3.2.1.22;00561+3.2.1.22;00603+3.2.1.22;00600+3.2.1.22
ENSONIG00000000604	sodium-dependent multivitamin transporter	slc5a6b	11.2998	12.9732	-1.14865	-0.199943	3.57017	1.05114	0.305244	0.999804	2	protein_coding	ZDB-GENE-050913-86	100705048	I3IVX8;I3IVX9	GO:0055085;GO:0022857;GO:0016020;GO:0016021	transmembrane transport;transmembrane transporter activity;membrane;integral component of membrane	biological_process;molecular_function;cellular_component	PTHR11819_SF124	SODIUM DEPENDENT MULTIVITAMIN TRANSPORTER NA + DEPENDENT MULTIVITAMIN TRANSPORTER SOLUTE CARRIER FAMILY 5 MEMBER 6	GO:0005575;GO:0022857;GO:0003674;GO:0006810;GO:0055085	cellular_component;transmembrane transporter activity;molecular_function;transport;transmembrane transport
ENSONIG00000000605	dorsal inhibitory axon guidance protein	draxin	33.2816	37.2289	-1.11636	-0.158804	5.1337	1.68362	0.194444	0.999804	1	protein_coding	ZDB-GENE-050913-20	100710150	I3IVY0	GO:0007411;GO:0016055;GO:0005576;GO:0007275;GO:0021516;GO:0021528;GO:0030900	axon guidance;Wnt signaling pathway;extracellular region;multicellular organism development;dorsal spinal cord development;commissural neuron differentiation in spinal cord;forebrain development	biological_process;cellular_component	TF333255	DRAXIN PRECURSOR DORSAL INHIBITORY AXON GUIDANCE DORSAL REPULSIVE AXON GUIDANCE	GO:0005575;GO:0005576;GO:0007165;GO:0048856;GO:0030154	cellular_component;extracellular region;signal transduction;anatomical structure development;cell differentiation
ENSONIG00000000606	eukaryotic initiation factor 4A-I	eif4a1a	196.854	190.11	1.03556	0.0504073	7.60237	0.16594	0.683746	0.999804	1	protein_coding	ZDB-GENE-031030-2	100693841	I3IVY1	GO:0004004;GO:0003743;GO:0005524;GO:0003676;GO:0000166;GO:0016787;GO:0004386;GO:0006413	ATP-dependent RNA helicase activity;translation initiation factor activity;ATP binding;nucleic acid binding;nucleotide binding;hydrolase activity;helicase activity;translational initiation	molecular_function;biological_process	PTHR24031_SF226	EUKARYOTIC INITIATION FACTOR 4A II EIF 4A II EIF4A II EC_3.6.4.13 ATP DEPENDENT RNA HELICASE EIF4A 2	GO:0003674;GO:0043167;GO:0003723;GO:0008135;GO:0016887;GO:0004386	molecular_function;ion binding;RNA binding;translation factor activity, RNA binding;ATPase activity;helicase activity
ENSONIG00000000607	coiled-coil domain containing 6	ccdc6a	183.829	183.216	1.00272	0.00392149	7.54399	0.00207587	0.96366	0.999804	1	protein_coding	ZDB-GENE-030131-7848	100708579	I3IVY2				PTHR15276	COILED COIL DOMAIN CONTAINING 6
ENSONIG00000000608	angiotensin II receptor associated protein	agtrap	6.71098	8.45264	-1.2534	-0.325843	2.78907	2.29511	0.129782	0.999804	1	protein_coding	ZDB-GENE-050309-11	100710409	I3IVY3	GO:0038166;GO:0016020;GO:0016021	angiotensin-activated signaling pathway;membrane;integral component of membrane	biological_process;cellular_component	PTHR16521	TYPE 1 ANGIOTENSIN II RECEPTOR ASSOCIATED AT1 RECEPTOR ASSOCIATED	GO:0007165;GO:0005575	signal transduction;cellular_component
ENSONIG00000000609	mitochondrial ribosomal protein S18A	mrps18a	2.39837	2.90415	-1.20025	-0.263332	1.47611	1.04262	0.307213	0.999804	1	protein_coding	ZDB-GENE-041210-109	100707518	I3IVY4	GO:0005622;GO:0005840;GO:0006412;GO:0003735	intracellular;ribosome;translation;structural constituent of ribosome	cellular_component;biological_process;molecular_function	PTHR16050_SF0	28S RIBOSOMAL S18A MITOCHONDRIAL PRECURSOR MRP S18 A MRPS18A S18MT A 28S RIBOSOMAL S18 3 MITOCHONDRIAL MRP S18 3	GO:0003674;GO:0005198;GO:0003735;GO:0009058;GO:0034641;GO:0006412;GO:0032991;GO:0005575;GO:0043226;GO:0005840;GO:0005622	molecular_function;structural molecule activity;structural constituent of ribosome;biosynthetic process;cellular nitrogen compound metabolic process;translation;protein-containing complex;cellular_component;organelle;ribosome;intracellular
ENSONIG00000000610	solute carrier family 16 member 9	slc16a9a	169.364	167.227	1.01227	0.0175899	7.34517	0.0109095	0.916813	0.999804	1	protein_coding	ZDB-GENE-040426-1364	100708848	I3IVY5	GO:0055085;GO:0016021;GO:0016020	transmembrane transport;integral component of membrane;membrane	biological_process;cellular_component	PTHR11360_SF16	MONOCARBOXYLATE TRANSPORTER 9 MCT 9 SOLUTE CARRIER FAMILY 16 MEMBER 9	GO:0005575;GO:0006810;GO:0055085	cellular_component;transport;transmembrane transport
ENSONIG00000000611	radial spoke head 9 homolog	rsph9	17.0902	17.4529	-1.02246	-0.0320399	4.16797	0.0553184	0.814055	0.999804	1	protein_coding	ZDB-GENE-051120-129			GO:0003341;GO:0035082;GO:0060271;GO:0005929;GO:0005930;GO:0060091	cilium movement;axoneme assembly;cilium assembly;cilium;axoneme;kinocilium	biological_process;cellular_component	PTHR22069	RADIAL SPOKE HEAD 9 HOMOLOG	GO:0007010;GO:0022607;GO:0005575;GO:0043226;GO:0005929	cytoskeleton organization;cellular component assembly;cellular_component;organelle;cilium
ENSONIG00000000612	ring finger protein 207	RNF207	4.2113	5.87175	-1.38616	-0.47109	2.37146	3.11275	0.0776815	0.999804	2	protein_coding		100701463	I3IVY7;I3IVY8	GO:0030544;GO:0008270;GO:0046872	Hsp70 protein binding;zinc ion binding;metal ion binding	molecular_function	PTHR22635	RING FINGER 207	GO:0003674;GO:0043167	molecular_function;ion binding
ENSONIG00000000613			18.0844	18.3514	-1.02032	-0.0290287	4.27849	0.0384391	0.844564	0.999804	1	protein_coding				GO:0007165	signal transduction	biological_process	PTHR15904	FAM13A	GO:0007165	signal transduction
ENSONIG00000000614	CSC1-like protein 1	tmem63a	4.5077	4.27199	1.05447	0.0765148	2.24772	0.100463	0.751274	0.999804	1	protein_coding	ZDB-GENE-041210-107	100705739	I3IVZ0	GO:0016020;GO:0016021	membrane;integral component of membrane	cellular_component	PTHR13018_SF24	CSC1 1 TRANSMEMBRANE 63A	GO:0005575	cellular_component
ENSONIG00000000615	ribosomal protein L22	rpl22	48.6201	50.2605	-1.03429	-0.0486355	5.67211	0.0954596	0.757348	0.999804	1	protein_coding	ZDB-GENE-051113-276			GO:0005622;GO:0005840;GO:0006412;GO:0003735	intracellular;ribosome;translation;structural constituent of ribosome	cellular_component;biological_process;molecular_function	PTHR10064_SF2	60S RIBOSOMAL L22	GO:0003674;GO:0005198;GO:0003735;GO:0009058;GO:0034641;GO:0006412;GO:0032991;GO:0005575;GO:0043226;GO:0005840;GO:0005622	molecular_function;structural molecule activity;structural constituent of ribosome;biosynthetic process;cellular nitrogen compound metabolic process;translation;protein-containing complex;cellular_component;organelle;ribosome;intracellular
ENSONIG00000000616	zinc finger MIZ-type containing 2	ZMIZ2	25.0521	22.5806	1.10884	0.149047	4.49325	0.376932	0.53925	0.999804	2	protein_coding				GO:0008270	zinc ion binding	molecular_function	PTHR10782	E3 SUMO LIGASE INHIBITOR OF ACTIVATED STAT	GO:0003674;GO:0043167	molecular_function;ion binding
ENSONIG00000000617	leucine rich repeats and calponin homology domain containing 4	lrch4	31.253	32.5422	-1.04307	-0.0608397	4.9957	0.360389	0.54829	0.999804	2	protein_coding	ZDB-GENE-060503-749	100696768	I3IVZ4;I3IVZ5	GO:0005515;GO:0016020;GO:0016021	protein binding;membrane;integral component of membrane	molecular_function;cellular_component	PTHR23155_SF439	LEUCINE RICH REPEATS AND CALPONIN HOMOLOGY CH DOMAIN CONTAINING 4	GO:0003674;GO:0005575	molecular_function;cellular_component
ENSONIG00000000618	phytanoyl-CoA 2-hydroxylase interacting protein like	phyhipla	174.4	178.862	-1.02582	-0.0367836	7.48847	0.183703	0.66821	0.999804	1	protein_coding	ZDB-GENE-061215-64	100701515	I3IVZ6	GO:0005515	protein binding	molecular_function	PTHR15698	PHYTANOYL COA HYDROXYLASE INTERACTING PHYTANOYL COA HYDROXYLASE ASSOCIATED 1 PAHX AP1 PAHXAP1	GO:0003674	molecular_function
ENSONIG00000000619	chromodomain helicase DNA binding protein 5	chd5	304.448	302.156	1.00737	0.0105876	8.24366	0.0117574	0.913653	0.999804	1	protein_coding	ZDB-GENE-120314-2			GO:0005524;GO:0005634;GO:0046872;GO:0043044;GO:0048703;GO:0060322	ATP binding;nucleus;metal ion binding;ATP-dependent chromatin remodeling;embryonic viscerocranium morphogenesis;head development	molecular_function;cellular_component;biological_process	PTHR10799_SF583	CHROMODOMAIN HELICASE DNA BINDING 5 CHD 5 EC_3.6.4.12 ATP DEPENDENT HELICASE CHD5	GO:0003674;GO:0043167;GO:0005575;GO:0043226;GO:0005634;GO:0048856;GO:0009790	molecular_function;ion binding;cellular_component;organelle;nucleus;anatomical structure development;embryo development
ENSONIG00000000620	BicC family RNA binding protein 1	bicc1a	22.2381	21.0386	1.05458	0.0766679	4.43144	0.187422	0.665071	0.999804	2	protein_coding	ZDB-GENE-101223-3	100709389	I3IVZ8;I3IVZ9	GO:0003723;GO:0003676;GO:0005515	RNA binding;nucleic acid binding;protein binding	molecular_function	PTHR10627_SF32	BICAUDAL C HOMOLOG 1 BIC C	GO:0003674;GO:0003723	molecular_function;RNA binding
ENSONIG00000000622	histone H2A.Z	H2AFZ	269.556	262.38	1.02706	0.0385274	8.08148	0.181784	0.669844	0.999804	1	protein_coding		100694115	I3IW01	GO:0000786;GO:0046982;GO:0005634;GO:0003677;GO:0005694	nucleosome;protein heterodimerization activity;nucleus;DNA binding;chromosome	cellular_component;molecular_function	PTHR23430_SF34	HISTONE H2A	GO:0003674;GO:0003677;GO:0005575;GO:0043226;GO:0005634;GO:0032991;GO:0005694	molecular_function;DNA binding;cellular_component;organelle;nucleus;protein-containing complex;chromosome
ENSONIG00000000625	structural maintenance of chromosomes protein 6	smc6	13.1787	15.7032	-1.18801	-0.248542	3.77051	1.95704	0.16183	0.999804	1	protein_coding	ZDB-GENE-110303-1	100705580	I3IW04	GO:0030915;GO:0000724;GO:0006281;GO:0005634;GO:0000166;GO:0005524;GO:0005694;GO:0006310;GO:0006974;GO:0000781	Smc5-Smc6 complex;double-strand break repair via homologous recombination;DNA repair;nucleus;nucleotide binding;ATP binding;chromosome;DNA recombination;cellular response to DNA damage stimulus;chromosome, telomeric region	cellular_component;biological_process;molecular_function	PTHR19306	STRUCTURAL MAINTENANCE OF CHROMOSOMES	GO:0006259;GO:0006950;GO:0034641;GO:0032991;GO:0005575;GO:0043226;GO:0005694;GO:0005634;GO:0003674;GO:0043167	DNA metabolic process;response to stress;cellular nitrogen compound metabolic process;protein-containing complex;cellular_component;organelle;chromosome;nucleus;molecular_function;ion binding
ENSONIG00000000626	ubiquitin-conjugating enzyme E2 D4	ube2d1a	19.8521	15.1665	1.31056	0.390182	4.16453	2.7664	0.0962622	0.999804	1	protein_coding	ZDB-GENE-040426-1609	100701787	I3IW05	GO:0016740;GO:0000166;GO:0005524	transferase activity;nucleotide binding;ATP binding	molecular_function	PTHR24068_SF36	UBIQUITIN CONJUGATING ENZYME E2 D1 EC_2.3.2.23 E3 INDEPENDENT E2 UBIQUITIN CONJUGATING ENZYME D1 EC_2.3.2.- 24 E2 UBIQUITIN CONJUGATING ENZYME D1 UBIQUITIN CARRIER D1 UBIQUITIN LIGASE D1	GO:0003674;GO:0043167	molecular_function;ion binding
ENSONIG00000000627	Rho guanine nucleotide exchange factor (GEF) 10-like a	arhgef10la	126.721	132.778	-1.04741	-0.0668231	7.04429	0.491107	0.483434	0.999804	2	protein_coding	ZDB-GENE-120814-1			GO:0035023;GO:0005089;GO:0005515	regulation of Rho protein signal transduction;Rho guanyl-nucleotide exchange factor activity;protein binding	biological_process;molecular_function	PTHR12877	RHO GUANINE NUCLEOTIDE EXCHANGE FACTOR	GO:0003674	molecular_function
ENSONIG00000000628	failed axon connections homolog	faxca	144.068	172.749	-1.19965	-0.262612	7.24883	1.39654	0.237303	0.999804	1	protein_coding	ZDB-GENE-100422-7	100706531	I3IW08				PTHR12289	METAXIN MITOCHONDRIAL OUTER MEMBRANE IMPORT COMPLEX
ENSONIG00000000629	peptidyl-prolyl cis-trans isomerase	ppiab	134.647	135.057	-1.00242	-0.00348491	7.09668	0.000654075	0.979596	0.999804	1	protein_coding	ZDB-GENE-030131-7459	100699155	I3IW09	GO:0000413;GO:0003755;GO:0006457;GO:0016853	protein peptidyl-prolyl isomerization;peptidyl-prolyl cis-trans isomerase activity;protein folding;isomerase activity	biological_process;molecular_function	PTHR11071_SF191	PEPTIDYL PROLYL CIS TRANS ISOMERASE PPIASE EC_5.2.1.8 CYCLOPHILIN CYCLOSPORIN A BINDING EGCYP 1 ROTAMASE	GO:0006457;GO:0016853;GO:0006464	protein folding;isomerase activity;cellular protein modification process
ENSONIG00000000630	regulator of G protein signaling 7a	rgs7a	177.05	167.234	1.05879	0.0824144	7.46278	0.86028	0.35366	0.999804	1	protein_coding	ZDB-GENE-040718-276			GO:0035556;GO:0007186	intracellular signal transduction;G protein-coupled receptor signaling pathway	biological_process	PTHR10845_SF26	REGULATOR OF G SIGNALING 7 RGS7	GO:0007165	signal transduction
ENSONIG00000000631	cyclin C	ccnc	85.8534	92.6412	-1.07837	-0.108848	6.48744	1.26787	0.260167	0.999804	2	protein_coding	ZDB-GENE-030131-7369	100690260	I3IW11;I3IW12	GO:0016538;GO:0016592;GO:0000079;GO:0072015	cyclin-dependent protein serine/threonine kinase regulator activity;mediator complex;regulation of cyclin-dependent protein serine/threonine kinase activity;glomerular visceral epithelial cell development	molecular_function;cellular_component;biological_process	TF656289	CYCLIN C	GO:0032991;GO:0005575;GO:0003674;GO:0008150;GO:0030234;GO:0048856	protein-containing complex;cellular_component;molecular_function;biological_process;enzyme regulator activity;anatomical structure development
ENSONIG00000000633	visinin-like protein 1		3495.43	3312.7	1.05516	0.0774611	11.7474	0.928161	0.335341	0.999804	1	protein_coding		100696968	I3IW14	GO:0005509	calcium ion binding	molecular_function	PTHR23055_SF72	VISININ 1	GO:0003674;GO:0043167	molecular_function;ion binding
ENSONIG00000000634	sex comb on midleg-like protein 4	SCML4	281.043	294.316	-1.04705	-0.0663315	8.17833	0.429298	0.512334	0.999804	2	protein_coding		100705841	I3IW16;I3IW15	GO:0005515	protein binding	molecular_function	PTHR12247_SF6	SEX COMB ON MIDLEG 4	GO:0003674	molecular_function
ENSONIG00000000635	notochord granular surface	ngs	1.44884	1.10755	1.31798	0.398326	0.318452	0.391051	0.531747	0.999804	1	protein_coding	ZDB-GENE-080722-29			GO:0005882;GO:0005198;GO:0005200;GO:0007010;GO:0048570;GO:0060035	intermediate filament;structural molecule activity;structural constituent of cytoskeleton;cytoskeleton organization;notochord morphogenesis;notochord cell development	cellular_component;molecular_function;biological_process	PTHR23239_SF51	AMBIGUOUS	GO:0003674;GO:0005198;GO:0005575;GO:0007010;GO:0048856	molecular_function;structural molecule activity;cellular_component;cytoskeleton organization;anatomical structure development
ENSONIG00000000636	AFG1 like ATPase a	afg1la	7.44872	7.19035	1.03861	0.0546596	2.83991	0.0576103	0.810314	0.999804	1	protein_coding	ZDB-GENE-091006-2			GO:0005524	ATP binding	molecular_function	PTHR12169	AFG1 ATPASE LACTATION ELEVATED 1	GO:0003674;GO:0043167	molecular_function;ion binding
ENSONIG00000000637	immunoglobin superfamily, member 21a	igsf21a	70.3623	70.9527	-1.00659	-0.00947495	6.16467	0.00851035	0.926498	0.999804	1	protein_coding	ZDB-GENE-050809-118						PTHR10489_SF442	IMMUNOGLOBULIN SUPERFAMILY MEMBER 21 PRECURSOR IGSF21
ENSONIG00000000638	forkhead box protein O3		19.4926	16.6808	1.16448	0.219688	4.26561	1.64743	0.199309	0.999804	1	protein_coding		100706370	I3IW20	GO:0043565;GO:0003700;GO:0006355;GO:0003677;GO:0005634	sequence-specific DNA binding;DNA-binding transcription factor activity;regulation of transcription, DNA-templated;DNA binding;nucleus	molecular_function;biological_process;cellular_component	PTHR11829_SF129	FORKHEAD BOX O3	GO:0003674;GO:0003700;GO:0003677;GO:0005575;GO:0043226;GO:0005634	molecular_function;DNA-binding transcription factor activity;DNA binding;cellular_component;organelle;nucleus
ENSONIG00000000639			2.46855	3.53855	-1.42664	-0.51262	1.33395	1.72004	0.189688	0.999804	1	protein_coding							TF618145	UNCHARACTERIZED
ENSONIG00000000640	arylacetamide deacetylase-like 4	aadacl4	1.06262	1.6566	-1.56503	-0.646191	0.571173	3.00458	0.0830293	0.999804	1	protein_coding	ZDB-GENE-080919-2			GO:0052689;GO:0016021;GO:0016787	carboxylic ester hydrolase activity;integral component of membrane;hydrolase activity	molecular_function;cellular_component	PTHR23024_SF115	ARYLACETAMIDE DEACETYLASE 4 FRAGMENT	GO:0005575	cellular_component
ENSONIG00000000641			5.04552	4.87588	1.03373	0.0478616	2.39983	0.0566167	0.811926	0.999804	1	protein_coding							PTHR32226	TELO2 INTERACTING 2
ENSONIG00000000642	dehydrogenase/reductase 3	dhrs3b	6.59496	6.9418	-1.05951	-0.0834005	2.80156	0.13351	0.71482	0.999804	1	protein_coding	ZDB-GENE-041010-172	100711752	I3IW24	GO:0042572;GO:0004745;GO:0055114	retinol metabolic process;retinol dehydrogenase activity;oxidation-reduction process	biological_process;molecular_function	PTHR24316_SF322	SHORT CHAIN DEHYDROGENASE/REDUCTASE 3 EC_1.1.1.300 RETINAL SHORT CHAIN DEHYDROGENASE/REDUCTASE 1 RETSDR1	GO:0044281;GO:0006629	small molecule metabolic process;lipid metabolic process
ENSONIG00000000643			5.10824	6.8851	-1.34937	-0.432281	2.34453	2.69925	0.100395	0.999804	2	protein_coding							TF629101	COILED COIL DOMAIN CONTAINING 162
ENSONIG00000000644	phosphoglucomutase 3	pgm3	14.0436	15.6164	-1.1171	-0.159759	3.89117	0.874314	0.349764	0.999804	1	protein_coding	ZDB-GENE-041024-13	100694751	I3IW27	GO:0000287;GO:0004610;GO:0071704;GO:0016868;GO:0005975;GO:0046872;GO:0016853;GO:0006048	magnesium ion binding;phosphoacetylglucosamine mutase activity;organic substance metabolic process;intramolecular transferase activity, phosphotransferases;carbohydrate metabolic process;metal ion binding;isomerase activity;UDP-N-acetylglucosamine biosynthetic process	molecular_function;biological_process	PTHR22573_SF15	PHOSPHOACETYLGLUCOSAMINE MUTASE PAGM EC_5.4.2.3 ACETYLGLUCOSAMINE PHOSPHOMUTASE N ACETYLGLUCOSAMINE PHOSPHATE MUTASE	GO:0005975;GO:0016853;GO:0003674;GO:0043167;GO:0009058;GO:0044281;GO:0034641	carbohydrate metabolic process;isomerase activity;molecular_function;ion binding;biosynthetic process;small molecule metabolic process;cellular nitrogen compound metabolic process	00520+5.4.2.10;00520+5.4.2.3
ENSONIG00000000646	zinc finger and BTB domain containing 24	zbtb24	12.7577	12.7389	-1.00295	-0.00424941	3.56434	0.000730886	0.978432	0.999804	2	protein_coding	ZDB-GENE-081022-123	100706909	I3IW29;I3IW30	GO:0003676;GO:0005515	nucleic acid binding;protein binding	molecular_function	PTHR24375_SF3	ZINC FINGER AND BTB DOMAIN CONTAINING 24 BONE MORPHOGENETIC INDUCED FACTOR 1 ZINC FINGER 450	GO:0003674	molecular_function
ENSONIG00000000647	leucine rich repeat containing 38b	lrrc38b	23.3004	22.5688	1.03614	0.0512145	4.50597	0.146583	0.701823	0.999804	1	protein_coding	ZDB-GENE-141216-65			GO:0005515;GO:0016020;GO:0016021	protein binding;membrane;integral component of membrane	molecular_function;cellular_component	TF654510	LEUCINE RICH REPEAT CONTAINING 38	GO:0003674;GO:0005575	molecular_function;cellular_component
ENSONIG00000000648	ephrin type-B receptor 2	ephb2b	44.2998	44.7987	-1.00786	-0.0112948	5.4599	0.00993652	0.920597	0.999804	1	protein_coding	ZDB-GENE-050522-415	100712288	I3IW32	GO:0007169;GO:0005003;GO:0004713;GO:0005887;GO:0016021;GO:0006468;GO:0004672;GO:0005524;GO:0005515;GO:0016020;GO:0016740;GO:0000166;GO:0016301;GO:0016310;GO:0018108;GO:0004714;GO:0048013	transmembrane receptor protein tyrosine kinase signaling pathway;ephrin receptor activity;protein tyrosine kinase activity;integral component of plasma membrane;integral component of membrane;protein phosphorylation;protein kinase activity;ATP binding;protein binding;membrane;transferase activity;nucleotide binding;kinase activity;phosphorylation;peptidyl-tyrosine phosphorylation;transmembrane re…	biological_process;molecular_function;cellular_component	PTHR24416_SF123	EPHRIN TYPE B RECEPTOR 2 PRECURSOR EC_2.7.10.1 TYROSINE KINASE TYROSINE KINASE EPH 3 TYROSINE KINASE RECEPTOR 3 [CONTAINS EPHB2/CTF1 ; EPHB2/CTF2]	GO:0003674;GO:0043167;GO:0016301;GO:0006464;GO:0005575;GO:0007165	molecular_function;ion binding;kinase activity;cellular protein modification process;cellular_component;signal transduction
ENSONIG00000000649	D-aspartate oxidase	zgc:172341	7.82818	7.59434	1.03457	0.0490323	2.92955	0.0599124	0.806634	0.999804	1	protein_coding	ZDB-GENE-080204-116	100697237	I3IW33	GO:0046416;GO:0071949;GO:0003884;GO:0055114;GO:0016491	D-amino acid metabolic process;FAD binding;D-amino-acid oxidase activity;oxidation-reduction process;oxidoreductase activity	biological_process;molecular_function	PTHR11530	D AMINO ACID OXIDASE DAAO DAMOX DAO EC_1.4.3.3	GO:0016491;GO:0003674;GO:0043167;GO:0044281;GO:0006520	oxidoreductase activity;molecular_function;ion binding;small molecule metabolic process;cellular amino acid metabolic process
ENSONIG00000000650	gremlin 2, DAN family BMP antagonist a	grem2a	1.08423	0.739499	1.42676	0.512745	0.127035	1.56356	0.211145	0.999804	1	protein_coding	ZDB-GENE-131127-498						PTHR15283	GREMLIN PRECURSOR CYSTEINE KNOT SUPERFAMILY 1 BMP ANTAGONIST
ENSONIG00000000651			1.53566	2.02692	-1.32524	-0.406252	0.816467	0.728748	0.393289	0.999804	1	protein_coding							PTHR23213_SF185	FORMIN 2
ENSONIG00000000652			2.18264	2.42859	-1.1006	-0.138286	1.25105	0.237967	0.625678	0.999804	1	protein_coding				GO:0005515	protein binding	molecular_function	TF611725	STERILE ALPHA MOTIF DOMAIN CONTAINING 5 SAM DOMAIN CONTAINING 5	GO:0003674	molecular_function
ENSONIG00000000653	ryanodine receptor 2b (cardiac)	ryr2b	1.80552	1.76476	1.01099	0.0157649	1.01337	0.00113835	0.973085	0.999804	1	protein_coding	ZDB-GENE-061226-3			GO:0006816;GO:0006874;GO:0005219;GO:0005262;GO:0070588;GO:0005216;GO:0006811;GO:0055085;GO:0016021;GO:0005509;GO:0016020;GO:0005515;GO:0005623;GO:0051209	calcium ion transport;cellular calcium ion homeostasis;ryanodine-sensitive calcium-release channel activity;calcium channel activity;calcium ion transmembrane transport;ion channel activity;ion transport;transmembrane transport;integral component of membrane;calcium ion binding;membrane;protein binding;cell;release of sequestered calcium ion into cytosol	biological_process;molecular_function;cellular_component	PTHR13715_SF75	RYANODINE RECEPTOR 2 RYR 2 RYR2 CARDIAC MUSCLE RYANODINE RECEPTOR CARDIAC MUSCLE RYANODINE RECEPTOR CALCIUM RELEASE CHANNEL TYPE 2 RYANODINE RECEPTOR	GO:0003674;GO:0005575;GO:0043167;GO:0006810;GO:0055085;GO:0022857;GO:0042592;GO:0005623	molecular_function;cellular_component;ion binding;transport;transmembrane transport;transmembrane transporter activity;homeostatic process;cell
ENSONIG00000000654	syntaxin binding protein 5b (tomosyn)	stxbp5b	110.29	95.2355	1.15778	0.211361	6.68375	1.61091	0.204364	0.999804	2	protein_coding	ZDB-GENE-090821-5			GO:0016192;GO:0016021;GO:0005515	vesicle-mediated transport;integral component of membrane;protein binding	biological_process;cellular_component;molecular_function	PTHR10241	LETHAL 2 GIANT LARVAE HOMOLOG	GO:0003674;GO:0005575;GO:0006810;GO:0016192	molecular_function;cellular_component;transport;vesicle-mediated transport
ENSONIG00000000655	si:ch211-214j24.9	si:ch211-214j24.9	264.097	326.311	-1.23568	-0.305305	8.09846	0.335282	0.562565	0.999804	1	protein_coding	ZDB-GENE-041210-81		I3IW40	GO:0005543;GO:0030136;GO:0030276;GO:0048268;GO:0005545	phospholipid binding;clathrin-coated vesicle;clathrin binding;clathrin coat assembly;1-phosphatidylinositol binding	molecular_function;cellular_component;biological_process	PTHR22951	CLATHRIN ASSEMBLY	GO:0003674;GO:0043167;GO:0008289;GO:0022607;GO:0065003;GO:0005575;GO:0043226;GO:0031410	molecular_function;ion binding;lipid binding;cellular component assembly;protein-containing complex assembly;cellular_component;organelle;cytoplasmic vesicle
ENSONIG00000000663	terminal nucleotidyltransferase 5A	tent5ab	7.74183	8.1902	-1.0629	-0.0880095	3.03358	0.178448	0.672711	0.999804	2	protein_coding	ZDB-GENE-071004-35	100711093	I3IW49;I3IW50	GO:1990817	RNA adenylyltransferase activity	molecular_function	PTHR12974_SF25	TERMINAL NUCLEOTIDYLTRANSFERASE 5A EC_2.7.7.- HBV X TRANSACTIVATED GENE 11 HBV XAG TRANSACTIVATED 11	GO:0016779	nucleotidyltransferase activity
ENSONIG00000000664			2.89531	1.95929	1.48886	0.574207	1.35315	2.4882	0.114703	0.999804	1	protein_coding				GO:0005515	protein binding	molecular_function	PTHR11389_SF421	HISTONE LYSINE N METHYLTRANSFERASE PRDM6 EC_2.1.1.43 PR DOMAIN ZINC FINGER 6 PR DOMAIN CONTAINING 6	GO:0003674	molecular_function
ENSONIG00000000665	elongation of very long chain fatty acids protein 4	elovl4b	13.4416	14.7976	-1.1094	-0.149782	3.84947	0.530414	0.466433	0.999804	1	protein_coding	ZDB-GENE-030131-7672	100695278	I3IW52	GO:0005783;GO:0042761;GO:0019367;GO:0009922;GO:0016021;GO:0016020;GO:0016740;GO:0006629;GO:0005789;GO:0102336;GO:0102337;GO:0102338;GO:0102756;GO:0006631;GO:0006633;GO:0006636;GO:0034626;GO:0035338	endoplasmic reticulum;very long-chain fatty acid biosynthetic process;fatty acid elongation, saturated fatty acid;fatty acid elongase activity;integral component of membrane;membrane;transferase activity;lipid metabolic process;endoplasmic reticulum membrane;3-oxo-arachidoyl-CoA synthase activity;3-oxo-cerotoyl-CoA synthase activity;3-oxo-lignoceronyl-CoA synthase activity;very-long-chain 3-ketoa…	cellular_component;biological_process;molecular_function	PTHR11157	ELONGATION OF VERY LONG CHAIN FATTY ACIDS EC_2.3.1.199 3 KETO ACYL COA SYNTHASE ELOVL FATTY ACID ELONGASE ELOVL FA ELONGASE VERY LONG CHAIN 3 KETOACYL COA SYNTHASE VERY LONG CHAIN 3 OXOACYL COA SYNTHASE	GO:0005575;GO:0016746;GO:0009058;GO:0044281;GO:0006629;GO:0043226;GO:0005783;GO:0006790;GO:0034641;GO:0051186	cellular_component;transferase activity, transferring acyl groups;biosynthetic process;small molecule metabolic process;lipid metabolic process;organelle;endoplasmic reticulum;sulfur compound metabolic process;cellular nitrogen compound metabolic process;cofactor metabolic process	00062+2.3.1.199
ENSONIG00000000666			12.2911	13.0938	-1.06403	-0.0895405	3.68678	0.310702	0.57725	0.999804	1	protein_coding				GO:0003723;GO:0003676	RNA binding;nucleic acid binding	molecular_function	PTHR10288_SF100	FAR UPSTREAM ELEMENT BINDING 3 FUSE BINDING 3	GO:0003674;GO:0003723	molecular_function;RNA binding
ENSONIG00000000667	SOGA family member 3b	soga3b	51.6499	47.3512	1.09256	0.127713	5.64838	1.34585	0.246005	0.999804	1	protein_coding	ZDB-GENE-081022-198			GO:0010506;GO:0005615;GO:0016020;GO:0016021	regulation of autophagy;extracellular space;membrane;integral component of membrane	biological_process;cellular_component	PTHR15742	SOGA	GO:0005575;GO:0005615	cellular_component;extracellular space
ENSONIG00000000669	metabotropic glutamate receptor 1	grm1b	66.5013	66.2964	1.004	0.00576042	6.10066	0.00170755	0.967039	0.999804	2	protein_coding	ZDB-GENE-090821-3	100697502	I3IW57;I3IW56	GO:0016021;GO:0007186;GO:0004930;GO:0016020;GO:0007165;GO:0005886	integral component of membrane;G protein-coupled receptor signaling pathway;G protein-coupled receptor activity;membrane;signal transduction;plasma membrane	cellular_component;biological_process;molecular_function	PTHR24060	METABOTROPIC GLUTAMATE RECEPTOR PRECURSOR	GO:0003674;GO:0007165;GO:0005575;GO:0005886	molecular_function;signal transduction;cellular_component;plasma membrane
ENSONIG00000000670			1.74415	2.14992	-1.22669	-0.294775	1.03181	0.879078	0.348454	0.999804	1	protein_coding				GO:0051382;GO:0000278;GO:0046982;GO:0003677	kinetochore assembly;mitotic cell cycle;protein heterodimerization activity;DNA binding	biological_process;molecular_function			GO:0003674;GO:0003677;GO:0000278;GO:0007049;GO:0051276;GO:0022607;GO:0065003	molecular_function;DNA binding;mitotic cell cycle;cell cycle;chromosome organization;cellular component assembly;protein-containing complex assembly
ENSONIG00000000671	HD domain containing 2	hddc2	3.93936	4.37704	-1.09489	-0.130785	2.08498	0.346735	0.555967	0.999804	1	protein_coding	ZDB-GENE-050522-394			GO:0002953;GO:0016311	5'-deoxynucleotidase activity;dephosphorylation	molecular_function;biological_process	PTHR11845	HD DOMAIN CONTAINING	GO:0016791	phosphatase activity	00240+3.1.3.89
ENSONIG00000000672	tpd52 like 1	tpd52l1	2.4248	2.60611	-1.07491	-0.104213	1.48908	0.10915	0.741114	0.999804	1	protein_coding	ZDB-GENE-050522-121						PTHR19307_SF8	TUMOR D53 TUMOR D52 1
ENSONIG00000000673	ring finger protein 217	rnf217	21.7064	22.9437	-1.05735	-0.0804474	4.45196	0.308423	0.57865	0.999804	1	protein_coding	ZDB-GENE-060503-400			GO:0016567;GO:0004842;GO:0016020;GO:0016021;GO:0016740;GO:0046872	protein ubiquitination;ubiquitin-protein transferase activity;membrane;integral component of membrane;transferase activity;metal ion binding	biological_process;molecular_function;cellular_component	PTHR11685_SF103	PROBABLE E3 UBIQUITIN LIGASE RNF217 EC_2.3.2.31 IBR DOMAIN CONTAINING 1 RING FINGER 217	GO:0006464;GO:0005575;GO:0003674;GO:0043167	cellular protein modification process;cellular_component;molecular_function;ion binding
ENSONIG00000000674	sodium/potassium transporting ATPase interacting 2	nkain2	143.427	136.486	1.05081	0.0714997	7.13941	0.433581	0.510237	0.999804	3	protein_coding	ZDB-GENE-041014-77	100689826	I3IW64;I3IW62;I3IW63	GO:0016020;GO:0016021	membrane;integral component of membrane	cellular_component	PTHR13084_SF3	SODIUM/POTASSIUM TRANSPORTING ATPASE SUBUNIT BETA 1 INTERACTING 2 NA + /K + TRANSPORTING ATPASE SUBUNIT BETA 1 INTERACTING 2 T CELL LYMPHOMA BREAKPOINT ASSOCIATED TARGET 1	GO:0005575	cellular_component
ENSONIG00000000676	neuromedin-U receptor 2	nmur3	3.66278	4.26803	-1.16305	-0.217909	1.97703	0.518006	0.471694	0.999804	1	protein_coding	ZDB-GENE-130530-567	100702544	I3IW66	GO:0001607;GO:0016021;GO:0007186;GO:0004930;GO:0016020;GO:0007165;GO:0007218;GO:0048512	neuromedin U receptor activity;integral component of membrane;G protein-coupled receptor signaling pathway;G protein-coupled receptor activity;membrane;signal transduction;neuropeptide signaling pathway;circadian behavior	molecular_function;cellular_component;biological_process	PTHR24243	RECEPTOR	GO:0003674;GO:0007165;GO:0005575	molecular_function;signal transduction;cellular_component
ENSONIG00000000677	surfeit locus protein 4		3.7959	4.35713	-1.14185	-0.191371	2.03144	0.414895	0.519495	0.999804	1	protein_coding		100699423	I3IW67	GO:0016021;GO:0016020	integral component of membrane;membrane	cellular_component	PTHR23427_SF1	SURFEIT LOCUS 4	GO:0005575	cellular_component
ENSONIG00000000680			137.897	128.045	1.07799	0.108347	7.06537	0.875728	0.349374	0.999804	1	protein_coding							PTHR15934_SF2	UNCHARACTERIZED
ENSONIG00000000682	alkaline phosphatase	alpl	45.4864	52.5932	-1.1575	-0.211017	5.62084	1.35316	0.244727	0.999804	1	protein_coding	ZDB-GENE-040420-1	100689934	I3IW72	GO:0016791;GO:0003824;GO:0016787;GO:0016311;GO:0004035;GO:0009612	phosphatase activity;catalytic activity;hydrolase activity;dephosphorylation;alkaline phosphatase activity;response to mechanical stimulus	molecular_function;biological_process	PTHR11596	ALKALINE PHOSPHATASE PRECURSOR EC_3.1.3.1 ALKALINE PHOSPHATASE	GO:0003674;GO:0016791	molecular_function;phosphatase activity	00790+3.1.3.1;00730+3.1.3.1
ENSONIG00000000683	mediator complex subunit 23	med23	35.5085	34.0035	1.0406	0.0574106	5.13723	0.284245	0.593932	0.999804	1	protein_coding	ZDB-GENE-040724-82						PTHR12691	MEDIATOR OF RNA POLYMERASE II TRANSCRIPTION SUBUNIT 23 COFACTOR REQUIRED SP1 TRANSCRIPTIONAL ACTIVATION SUBUNIT 3 CRSP COMPLEX SUBUNIT 3 MEDIATOR COMPLEX SUBUNIT 23
ENSONIG00000000684	SNF2 histone linker PHD RING helicase	shprh	32.1045	32.7024	-1.01754	-0.0250804	4.97131	0.042472	0.836723	0.999804	1	protein_coding	ZDB-GENE-110512-2			GO:0006334;GO:0000786;GO:0005524;GO:0005634;GO:0003677;GO:0046872	nucleosome assembly;nucleosome;ATP binding;nucleus;DNA binding;metal ion binding	biological_process;cellular_component;molecular_function	PTHR10799_SF552	E3 UBIQUITIN LIGASE SHPRH EC_2.3.2.27 EC_3.6.4.- RING TYPE E3 UBIQUITIN TRANSFERASE SHPRH SNF2 HISTONE LINKER PHD AND RING FINGER DOMAIN CONTAINING HELICASE	GO:0003674;GO:0003677;GO:0005575;GO:0043226;GO:0005634;GO:0043167;GO:0032991;GO:0022607;GO:0065003	molecular_function;DNA binding;cellular_component;organelle;nucleus;ion binding;protein-containing complex;cellular component assembly;protein-containing complex assembly
ENSONIG00000000685	si:dkeyp-110a12.4	si:dkeyp-110a12.4	1.83263	1.18093	1.55101	0.633205	0.734605	1.68093	0.194802	0.999804	1	protein_coding	ZDB-GENE-131121-498						PTHR22962_SF132	UNCHARACTERIZED
ENSONIG00000000686	Kazal-type serine peptidase inhibitor domain 3	kazald3	0.982128	0.446228	2.12104	1.08477	-0.193951	4.20595	0.0402824	0.999804	1	protein_coding	ZDB-GENE-050208-155			GO:0001558;GO:0005520;GO:0005576;GO:0005515	regulation of cell growth;insulin-like growth factor binding;extracellular region;protein binding	biological_process;molecular_function;cellular_component	PTHR14186	INSULIN GROWTH FACTOR BINDING PRECURSOR BINDING IGFBP	GO:0003674;GO:0005575;GO:0005576	molecular_function;cellular_component;extracellular region
ENSONIG00000000687	F-box only protein 30	fbxo30a	1.64736	1.02038	1.5926	0.671384	0.540303	1.51442	0.218466	0.999804	2	protein_coding	ZDB-GENE-040426-1215	100697774	I3IW78;I3IW77	GO:0061630;GO:0008270;GO:0005515;GO:0046872;GO:0016567	ubiquitin protein ligase activity;zinc ion binding;protein binding;metal ion binding;protein ubiquitination	molecular_function;biological_process	PTHR15933	F BOX ONLY	GO:0003674;GO:0043167;GO:0006464	molecular_function;ion binding;cellular protein modification process
ENSONIG00000000688			2.81593	2.85899	1.00131	0.00188293	1.50286	2.90923e-05	0.995696	0.999804	1	protein_coding				GO:0090036;GO:0010739;GO:0051018;GO:0006605;GO:0007165;GO:0005623	regulation of protein kinase C signaling;positive regulation of protein kinase A signaling;protein kinase A binding;protein targeting;signal transduction;cell	biological_process;molecular_function;cellular_component			GO:0007165;GO:0006810;GO:0006605;GO:0003674;GO:0005575;GO:0005623	signal transduction;transport;protein targeting;molecular_function;cellular_component;cell
ENSONIG00000000689			42.6387	43.1342	-1.00892	-0.0128142	5.46763	0.0163136	0.898367	0.999804	1	protein_coding				GO:0038023;GO:0005216;GO:0004970;GO:0006811;GO:0016020;GO:0016021;GO:0034220;GO:0005886;GO:0030054;GO:0035235;GO:0045202;GO:0045211	signaling receptor activity;ion channel activity;ionotropic glutamate receptor activity;ion transport;membrane;integral component of membrane;ion transmembrane transport;plasma membrane;cell junction;ionotropic glutamate receptor signaling pathway;synapse;postsynaptic membrane	molecular_function;biological_process;cellular_component	PTHR18966_SF160	GLUTAMATE [NMDA] RECEPTOR SUBUNIT 1	GO:0005575;GO:0006810;GO:0022857;GO:0003674;GO:0055085;GO:0005886;GO:0007165	cellular_component;transport;transmembrane transporter activity;molecular_function;transmembrane transport;plasma membrane;signal transduction
ENSONIG00000000690	required for meiotic nuclear division 1 homolog	rmnd1	23.2809	23.9168	-1.02847	-0.0405035	4.55138	0.0734924	0.786318	0.999804	1	protein_coding	ZDB-GENE-050522-21	100709053	I3IW81				PTHR16255	REQUIRED MEIOTIC NUCLEAR DIVISION 1
ENSONIG00000000692	spectrin repeat containing, nuclear envelope 1b	syne1b	132.344	125.378	1.05576	0.0782857	6.90422	0.234537	0.62818	0.999804	1	protein_coding	ZDB-GENE-071218-4			GO:0034993;GO:0005635;GO:0090286;GO:0051015;GO:0016021;GO:0005515;GO:0016020;GO:0003779	meiotic nuclear membrane microtubule tethering complex;nuclear envelope;cytoskeletal anchoring at nuclear membrane;actin filament binding;integral component of membrane;protein binding;membrane;actin binding	cellular_component;biological_process;molecular_function	PTHR11915_SF267	NESPRIN 1 ENAPTIN KASH DOMAIN CONTAINING 1 KASH1 MYOCYTE NUCLEAR ENVELOPE 1 MYNE 1 NUCLEAR ENVELOPE SPECTRIN REPEAT 1 SYNAPTIC NUCLEAR ENVELOPE 1 SYNE 1	GO:0003674;GO:0005575;GO:0008092;GO:0007010;GO:0005635;GO:0032991	molecular_function;cellular_component;cytoskeletal protein binding;cytoskeleton organization;nuclear envelope;protein-containing complex
ENSONIG00000000693	EH domain-containing protein 3	ehd3	122.256	127.013	-1.03807	-0.0539009	6.97564	0.345967	0.556405	0.999804	1	protein_coding	ZDB-GENE-041014-352	100697227	I3IW84	GO:0032456;GO:0005525;GO:0005509;GO:0005515;GO:0005623;GO:0060271	endocytic recycling;GTP binding;calcium ion binding;protein binding;cell;cilium assembly	biological_process;molecular_function;cellular_component	PTHR11216_SF67	EH DOMAIN CONTAINING 3	GO:0003674;GO:0043167;GO:0006810;GO:0016192;GO:0005575;GO:0005623;GO:0022607	molecular_function;ion binding;transport;vesicle-mediated transport;cellular_component;cell;cellular component assembly
ENSONIG00000000694	endothelin converting enzyme 1	ece1	7.05682	7.48092	-1.05994	-0.083977	2.81559	0.137115	0.711166	0.999804	1	protein_coding	ZDB-GENE-061110-100	100690201	I3IW85	GO:0016486;GO:0004222;GO:0008237;GO:0006508;GO:0016020;GO:0016021;GO:0048703	peptide hormone processing;metalloendopeptidase activity;metallopeptidase activity;proteolysis;membrane;integral component of membrane;embryonic viscerocranium morphogenesis	biological_process;molecular_function;cellular_component	PTHR11733_SF104	ENDOTHELIN CONVERTING ENZYME 1 ECE 1 EC_3.4.24.71	GO:0008233;GO:0034641;GO:0051604;GO:0005575;GO:0048856;GO:0009790	peptidase activity;cellular nitrogen compound metabolic process;protein maturation;cellular_component;anatomical structure development;embryo development
ENSONIG00000000695	protein stum homolog	stum	45.896	44.3824	1.03076	0.0437064	5.455	0.146085	0.702305	0.999804	2	protein_coding	ZDB-GENE-041014-164	100690633	I3IW86;I3IW87	GO:0016020;GO:0016021	membrane;integral component of membrane	cellular_component	PTHR21676	STUM	GO:0005575	cellular_component
ENSONIG00000000696	coenzyme Q8A	coq8a	32.9578	36.0779	-1.09774	-0.134543	5.14391	0.917569	0.338114	0.999804	1	protein_coding	ZDB-GENE-040718-487			GO:0005739;GO:0006744	mitochondrion;ubiquinone biosynthetic process	cellular_component;biological_process	PTHR10566_SF21	ATYPICAL KINASE COQ8A MITOCHONDRIAL PRECURSOR EC_2.7.-.- CHAPERONE ACTIVITY OF BC1 COMPLEX CHAPERONE ABC1 COENZYME Q 8A AARF DOMAIN CONTAINING KINASE 3	GO:0009058;GO:0044281;GO:0051186;GO:0005575;GO:0043226;GO:0005739	biosynthetic process;small molecule metabolic process;cofactor metabolic process;cellular_component;organelle;mitochondrion
ENSONIG00000000697	eukaryotic translation initiation factor 4 gamma, 3a	eif4g3a	59.0891	61.3544	-1.03778	-0.0535034	5.8794	0.200483	0.654331	0.999804	1	protein_coding	ZDB-GENE-120810-2			GO:0000339;GO:0003743;GO:0003723;GO:0005515;GO:0006413	RNA cap binding;translation initiation factor activity;RNA binding;protein binding;translational initiation	molecular_function;biological_process	PTHR23253_SF23	EUKARYOTIC TRANSLATION INITIATION FACTOR 4 GAMMA 3 EIF 4 GAMMA 3 EIF 4G 3 EIF4G 3 EIF 4 GAMMA II EIF4GII	GO:0003674;GO:0003723;GO:0008135	molecular_function;RNA binding;translation factor activity, RNA binding
ENSONIG00000000698	inositol-trisphosphate 3-kinase B	itpkb	24.2039	20.7406	1.16426	0.219411	4.55988	3.05214	0.0806306	0.999804	2	protein_coding	ZDB-GENE-041014-166			GO:0032958;GO:0016301;GO:0016740;GO:0016310	inositol phosphate biosynthetic process;kinase activity;transferase activity;phosphorylation	biological_process;molecular_function	PTHR12400_SF4	INOSITOL TRISPHOSPHATE 3 KINASE B EC_2.7.1.127 INOSITOL 1 4 5 TRISPHOSPHATE 3 KINASE B IP3 3 KINASE B IP3K B INSP 3 KINASE B	GO:0016301;GO:0009058;GO:0044281	kinase activity;biosynthetic process;small molecule metabolic process
ENSONIG00000000699	erythrocyte membrane protein band 4.1 like 2	EPB41L2	117.218	103.479	1.13401	0.18143	6.77143	3.30989	0.068864	0.999804	1	protein_coding			I3IW92	GO:0030866;GO:0008092;GO:0005856;GO:0005198;GO:0003779	cortical actin cytoskeleton organization;cytoskeletal protein binding;cytoskeleton;structural molecule activity;actin binding	biological_process;molecular_function;cellular_component	PTHR23280_SF17	UNKNOWN	GO:0003674;GO:0008092;GO:0005198;GO:0005575;GO:0043226;GO:0005856;GO:0007010	molecular_function;cytoskeletal protein binding;structural molecule activity;cellular_component;organelle;cytoskeleton;cytoskeleton organization
ENSONIG00000000700	docking protein 2	dok2	3.00029	3.96969	-1.33897	-0.421121	1.86214	2.47432	0.11572	0.999804	2	protein_coding	ZDB-GENE-080721-4			GO:0060319	primitive erythrocyte differentiation	biological_process	PTHR21258_SF14	DOCKING 2 DOWNSTREAM OF TYROSINE KINASE 2 P56 DOK 2	GO:0002376;GO:0042592;GO:0030154	immune system process;homeostatic process;cell differentiation
ENSONIG00000000701	TSC complex subunit 1	TSC1 (1 of many)	12.7075	12.2978	1.03569	0.050593	3.66602	0.111191	0.738793	0.999804	1	protein_coding			I3IW95	GO:0016020;GO:0016021	membrane;integral component of membrane	cellular_component	PTHR15154	TUBEROUS SCLEROSIS 1	GO:0005575	cellular_component
ENSONIG00000000702	MYC target 1	myct1b	3.2441	2.37719	1.37226	0.456557	1.65604	3.04459	0.0810065	0.999804	1	protein_coding	ZDB-GENE-131127-631	100698037	I3IW96	GO:0016020;GO:0016021	membrane;integral component of membrane	cellular_component	PTHR14869	MYC TARGET 1 MYC TARGET IN MYELOID CELLS 1	GO:0005575	cellular_component
ENSONIG00000000703	tubby like protein 4b	tulp4b	343.423	343.062	1.00115	0.00165816	8.42234	0.000257434	0.987199	0.999804	1	protein_coding	ZDB-GENE-130530-708			GO:0005515	protein binding	molecular_function	PTHR16517_SF2	TUBBY RELATED 4 TUBBY SUPERFAMILY TUBBY 4	GO:0003674	molecular_function
ENSONIG00000000704			3.75254	4.31687	-1.15462	-0.207415	1.95372	0.516085	0.472517	0.999804	1	protein_coding				GO:0019205;GO:0006139;GO:0005524;GO:0016740;GO:0016301;GO:0016310	nucleobase-containing compound kinase activity;nucleobase-containing compound metabolic process;ATP binding;transferase activity;kinase activity;phosphorylation	molecular_function;biological_process	PTHR23359_SF62	ADENYLATE KINASE 8 AK 8 EC_2.7.4.3 EC_2.7.4.- 6 ATP AMP TRANSPHOSPHORYLASE 8	GO:0003674;GO:0043167;GO:0034641;GO:0016301	molecular_function;ion binding;cellular nitrogen compound metabolic process;kinase activity	00730+2.7.4.3;00230+2.7.4.3
ENSONIG00000000705	heterochromatin protein 1, binding protein 3	hp1bp3	105.324	104.177	1.01039	0.0149092	6.73007	0.0233681	0.878504	0.999804	1	protein_coding	ZDB-GENE-060810-79			GO:0006334;GO:0000786;GO:0005634;GO:0003677;GO:0005694	nucleosome assembly;nucleosome;nucleus;DNA binding;chromosome	biological_process;cellular_component;molecular_function	PTHR15832	HETEROCHROMATIN 1 BINDING 3	GO:0003674;GO:0003677;GO:0005575;GO:0043226;GO:0005634;GO:0032991;GO:0022607;GO:0065003;GO:0005694	molecular_function;DNA binding;cellular_component;organelle;nucleus;protein-containing complex;cellular component assembly;protein-containing complex assembly;chromosome
ENSONIG00000000706	ddb1 and cul4 associated factor 7	dcaf7	230.866	229.893	1.00394	0.00567056	7.85498	0.00459857	0.945935	0.999804	1	protein_coding	ZDB-GENE-030131-9511		I3IWA0	GO:0005515;GO:0048703;GO:0051216;GO:0005634	protein binding;embryonic viscerocranium morphogenesis;cartilage development;nucleus	molecular_function;biological_process;cellular_component	PTHR19919	DDB1 AND CUL4 ASSOCIATED FACTOR 7 WD REPEAT CONTAINING 68 WD REPEAT CONTAINING AN11 HOMOLOG	GO:0003674;GO:0048856;GO:0009790;GO:0005575;GO:0043226;GO:0005634	molecular_function;anatomical structure development;embryo development;cellular_component;organelle;nucleus
ENSONIG00000000707	solute carrier family 18, subfamily B, member 1	slc18b1	9.19167	11.3996	-1.23763	-0.307577	3.31113	1.88639	0.16961	0.999804	1	protein_coding	ZDB-GENE-050417-386			GO:0055085;GO:0016021;GO:0016020	transmembrane transport;integral component of membrane;membrane	biological_process;cellular_component	PTHR24004_SF18	MFS TYPE TRANSPORTER SL SOLUTE CARRIER FAMILY 18 MEMBER B1	GO:0005575;GO:0006810;GO:0055085	cellular_component;transport;transmembrane transport
ENSONIG00000000708	transmembrane protein 200A	tmem200a	73.4476	65.099	1.12799	0.173755	6.12976	1.45565	0.227623	0.999804	2	protein_coding	ZDB-GENE-040724-81	100691709	I3IWA2;I3IWA3	GO:0016020;GO:0016021	membrane;integral component of membrane	cellular_component	PTHR31815	TRANSMEMBRANE TRANSMEMBRANE TTMA TWO TRANSMEMBRANE DOMAIN CONTAINING FAMILY MEMBER	GO:0005575	cellular_component
ENSONIG00000000709	kinesin family member 17	kif17	9.57268	11.9275	-1.24599	-0.317289	3.56093	0.746985	0.387433	0.999804	1	protein_coding	ZDB-GENE-080724-12			GO:0007018;GO:0008017;GO:0003777;GO:0005524;GO:0000166;GO:0005874;GO:0030030;GO:0035845;GO:0042462;GO:0005871;GO:0005930;GO:0036064	microtubule-based movement;microtubule binding;microtubule motor activity;ATP binding;nucleotide binding;microtubule;cell projection organization;photoreceptor cell outer segment organization;eye photoreceptor cell development;kinesin complex;axoneme;ciliary basal body	biological_process;molecular_function;cellular_component	PTHR24115_SF415	KINESIN	GO:0003674;GO:0043167;GO:0008092;GO:0005575;GO:0048856;GO:0032991;GO:0005815	molecular_function;ion binding;cytoskeletal protein binding;cellular_component;anatomical structure development;protein-containing complex;microtubule organizing center
ENSONIG00000000710	potassium voltage-gated channel subfamily H member 6	kcnh6a	10.9329	11.366	-1.04452	-0.0628348	3.41581	0.0859726	0.769361	0.999804	2	protein_coding	ZDB-GENE-040702-5	100702614	I3IWA5;I3IWA6	GO:0006813;GO:0005249;GO:0005216;GO:0006811;GO:0055085;GO:0016021;GO:0016020;GO:0005244;GO:0034765;GO:0005267;GO:0071805;GO:0008016;GO:0060047;GO:0060307;GO:0086013	potassium ion transport;voltage-gated potassium channel activity;ion channel activity;ion transport;transmembrane transport;integral component of membrane;membrane;voltage-gated ion channel activity;regulation of ion transmembrane transport;potassium channel activity;potassium ion transmembrane transport;regulation of heart contraction;heart contraction;regulation of ventricular cardiac muscle ce…	biological_process;molecular_function;cellular_component	PTHR10217_SF474	POTASSIUM VOLTAGE GATED CHANNEL SUBFAMILY H EAG RELATED MEMBER 6	GO:0005575;GO:0006810;GO:0055085;GO:0022857;GO:0003674;GO:0003013;GO:0008150	cellular_component;transport;transmembrane transport;transmembrane transporter activity;molecular_function;circulatory system process;biological_process
ENSONIG00000000711	DEAD-box helicase 31	ddx31	16.9722	16.817	1.00977	0.0140217	4.07161	0.00924949	0.923382	0.999804	1	protein_coding	ZDB-GENE-030131-3973	100706420	I3IWA7	GO:0005524;GO:0003676;GO:0000166;GO:0016787;GO:0003723;GO:0004386	ATP binding;nucleic acid binding;nucleotide binding;hydrolase activity;RNA binding;helicase activity	molecular_function	PTHR24031_SF89	ATP DEPENDENT RNA HELICASE EC_3.6.4.13	GO:0003674;GO:0043167;GO:0003723;GO:0004386	molecular_function;ion binding;RNA binding;helicase activity
ENSONIG00000000712	Abelson helper integration site 1	ahi1	13.1769	16.9018	-1.28259	-0.359058	3.90867	3.72419	0.0536295	0.999804	2	protein_coding	ZDB-GENE-060803-1	100710392	I3IWA9;I3IWA8	GO:0005515;GO:0007368;GO:0035845;GO:0044458;GO:0071599	protein binding;determination of left/right symmetry;photoreceptor cell outer segment organization;motile cilium assembly;otic vesicle development	molecular_function;biological_process	PTHR22847_SF50	JOUBERIN ABELSON HELPER INTEGRATION SITE 1 AHI 1	GO:0003674;GO:0048856;GO:0022607	molecular_function;anatomical structure development;cellular component assembly
ENSONIG00000000715	alpha-actinin-2	actn2b	2.273	2.45796	-1.07483	-0.10411	1.30579	0.0704994	0.790611	0.999804	1	protein_coding	ZDB-GENE-051127-39	100702502	I3IWB2	GO:0005509;GO:0005515;GO:0003779;GO:0001654;GO:0007507;GO:0030239;GO:0045214;GO:0048741	calcium ion binding;protein binding;actin binding;eye development;heart development;myofibril assembly;sarcomere organization;skeletal muscle fiber development	molecular_function;biological_process	PTHR11915_SF236	ALPHA ACTININ ALPHA ACTININ SKELETAL MUSCLE F ACTIN CROSS LINKING	GO:0003674;GO:0043167;GO:0008092;GO:0048856;GO:0007010;GO:0022607;GO:0048646	molecular_function;ion binding;cytoskeletal protein binding;anatomical structure development;cytoskeleton organization;cellular component assembly;anatomical structure formation involved in morphogenesis
ENSONIG00000000717	Rho GTPase activating protein 18	arhgap18	35.6137	33.4494	1.06211	0.086928	5.14038	0.304479	0.581088	0.999804	2	protein_coding	ZDB-GENE-070502-1	100692247	I3IWB5;I3IWB4	GO:0007165;GO:1903671	signal transduction;negative regulation of sprouting angiogenesis	biological_process	PTHR14963_SF6	RHO GTPASE ACTIVATING 18 RHO TYPE GTPASE ACTIVATING 18	GO:0007165	signal transduction
ENSONIG00000000719	microtubule-associated protein 7a	map7a	118.83	127.721	-1.07518	-0.104575	6.97369	1.00011	0.317283	0.999804	1	protein_coding	ZDB-GENE-131121-151			GO:0015630;GO:0000226	microtubule cytoskeleton;microtubule cytoskeleton organization	cellular_component;biological_process	PTHR15073	MAP7 DOMAIN CONTAINING	GO:0007010;GO:0005575;GO:0043226;GO:0005856	cytoskeleton organization;cellular_component;organelle;cytoskeleton
ENSONIG00000000721	otoferlin b	otofb	2.79742	5.66726	-2.00819	-1.0059	2.05854	6.83821	0.00892284	0.999804	1	protein_coding	ZDB-GENE-110406-5			GO:0016021;GO:0016020;GO:0010996;GO:0050885	integral component of membrane;membrane;response to auditory stimulus;neuromuscular process controlling balance	cellular_component;biological_process	PTHR12546_SF32	OTOFERLIN FER 1 2	GO:0005575;GO:0050877	cellular_component;nervous system process
ENSONIG00000000722	SEL1L, ERAD E3 ligase adaptor subunit	sel1l	61.2375	62.819	-1.02809	-0.0399679	5.91046	0.119461	0.72962	0.999804	1	protein_coding	ZDB-GENE-041001-122	100692516	I3IWC1	GO:0005515	protein binding	molecular_function	PTHR11102_SF55	SEL 1 HOMOLOG 1 PRECURSOR SUPPRESSOR OF LIN 12 1 SEL 1L	GO:0003674	molecular_function
ENSONIG00000000723	quiescin Q6 sulfhydryl oxidase 2	qsox2	14.8639	15.112	-1.01685	-0.0241065	3.92512	0.0222008	0.881554	0.999804	1	protein_coding	ZDB-GENE-110203-4			GO:0016971;GO:0016972;GO:0045454;GO:0055114;GO:0016020;GO:0016021;GO:0016491;GO:0005623	flavin-linked sulfhydryl oxidase activity;thiol oxidase activity;cell redox homeostasis;oxidation-reduction process;membrane;integral component of membrane;oxidoreductase activity;cell	molecular_function;biological_process;cellular_component	PTHR22897_SF7	SULFHYDRYL OXIDASE 2 PRECURSOR EC_1.8.3.2 QUIESCIN Q6 1	GO:0042592;GO:0005575;GO:0016491;GO:0005623	homeostatic process;cellular_component;oxidoreductase activity;cell
ENSONIG00000000724	glial fibrillary acidic protein	gfap	964.272	1001.41	-1.03839	-0.0543526	9.90095	0.28684	0.592252	0.999804	1	protein_coding	ZDB-GENE-990914-3	100534495	I3IWC3	GO:0005882;GO:0005198	intermediate filament;structural molecule activity	cellular_component;molecular_function	PTHR23239_SF41	GLIAL FIBRILLARY ACIDIC GFAP	GO:0003674;GO:0005198;GO:0005575	molecular_function;structural molecule activity;cellular_component
ENSONIG00000000725	chromogranin A		401.252	408.411	-1.01794	-0.0256511	8.67375	0.0744903	0.784908	0.999804	2	protein_coding		100692785	I3IWC5;I3IWC4	GO:0030141	secretory granule	cellular_component	PTHR10583	CHROMOGRANIN A PRECURSOR CGA [CONTAINS PANCREASTATIN; WE 14; GE SERPININ P GLU SERPININ	GO:0005575;GO:0043226;GO:0031410	cellular_component;organelle;cytoplasmic vesicle
ENSONIG00000000726	p21 (RAC1) activated kinase 2	PAK2	13.5894	13.7496	-1.00772	-0.0110979	3.77777	0.00450774	0.94647	0.999804	2	protein_coding				GO:0004674;GO:0006468;GO:0004672;GO:0005524;GO:0016740;GO:0000166;GO:0016301;GO:0016310	protein serine/threonine kinase activity;protein phosphorylation;protein kinase activity;ATP binding;transferase activity;nucleotide binding;kinase activity;phosphorylation	molecular_function;biological_process	PTHR24361_SF250	SERINE/THREONINE KINASE PAK EC_2.7.11.1 PAK P21 ACTIVATED KINASE PAK	GO:0003674;GO:0043167;GO:0016301;GO:0006464	molecular_function;ion binding;kinase activity;cellular protein modification process	04151+2.7.11.1;04150+2.7.11.1;05165+2.7.11.1;04926+2.7.11.1;04714+2.7.11.1;05170+2.7.11.1;05163+2.7.11.1
ENSONIG00000000727			14.7719	12.1046	1.22029	0.287228	3.76254	1.11945	0.290038	0.999804	1	protein_coding				GO:0005515	protein binding	molecular_function	PTHR23228_SF7	NUCLEUS ACCUMBENS ASSOCIATED 2 NAC 2 BTB/POZ DOMAIN CONTAINING 14A	GO:0003674	molecular_function
ENSONIG00000000728	mitogen-activated protein kinase kinase kinase 3	map3k3	4.75838	5.18418	-1.09102	-0.125673	2.30926	0.0774208	0.780824	0.999804	1	protein_coding	ZDB-GENE-070910-1	100692691	I3IWC9	GO:0006468;GO:0004672;GO:0005524;GO:0005515;GO:0007507;GO:0009948	protein phosphorylation;protein kinase activity;ATP binding;protein binding;heart development;anterior/posterior axis specification	biological_process;molecular_function	PTHR24360_SF38	MITOGEN ACTIVATED KINASE KINASE KINASE 3 EC_2.7.11.25 MAPK/ERK KINASE KINASE 3 MEK KINASE 3 MEKK 3	GO:0003674;GO:0043167;GO:0016301;GO:0006464;GO:0048856	molecular_function;ion binding;kinase activity;cellular protein modification process;anatomical structure development
ENSONIG00000000729	cellular communication network factor 2	ccn2a	20.2366	19.8805	1.01491	0.0213516	4.27447	0.00524091	0.942288	0.999804	1	protein_coding	ZDB-GENE-030131-102	100693059	I3IWD0	GO:0005520;GO:0005576;GO:0005515;GO:0007492;GO:0030903;GO:0031099;GO:0043009	insulin-like growth factor binding;extracellular region;protein binding;endoderm development;notochord development;regeneration;chordate embryonic development	molecular_function;cellular_component;biological_process	PTHR11348_SF7	CONNECTIVE TISSUE GROWTH FACTOR PRECURSOR CCN FAMILY MEMBER 2	GO:0003674;GO:0005575;GO:0005576;GO:0048856;GO:0009790	molecular_function;cellular_component;extracellular region;anatomical structure development;embryo development
ENSONIG00000000730	Cdk5 and Abl enzyme substrate 2b	cables2b	8.12776	7.1733	1.13164	0.178412	2.85254	0.569747	0.45036	0.999804	1	protein_coding	ZDB-GENE-090313-249			GO:0051726	regulation of cell cycle	biological_process	PTHR22896	CDK5 AND ABL1 ENZYME SUBSTRATE INTERACTOR WITH CDK3 IK3
ENSONIG00000000731	bromodomain containing 3b	brd3b	56.8554	57.1467	-1.00605	-0.00869499	5.7964	0.00592974	0.93862	0.999804	1	protein_coding	ZDB-GENE-030131-5316			GO:0005515	protein binding	molecular_function	PTHR22880_SF143	BROMODOMAIN CONTAINING 4	GO:0003674	molecular_function
ENSONIG00000000732	CCM2 like scaffold protein	ccm2l	1.99669	1.55373	1.27897	0.354987	1.10127	1.18463	0.276416	0.999804	1	protein_coding	ZDB-GENE-090313-248						PTHR21642	CEREBRAL CAVERNOUS MALFORMATIONS 2
ENSONIG00000000733	syntaxin 7	stx7l	15.5941	14.5869	1.06496	0.0908018	3.85174	0.134287	0.714028	0.999804	1	protein_coding	ZDB-GENE-041014-35	100697763	I3IWD4	GO:0005484;GO:0016192;GO:0006886;GO:0016020;GO:0016021;GO:0005623;GO:0061025	SNAP receptor activity;vesicle-mediated transport;intracellular protein transport;membrane;integral component of membrane;cell;membrane fusion	molecular_function;biological_process;cellular_component	PTHR19957	SYNTAXIN	GO:0005575;GO:0006810;GO:0016192;GO:0003674;GO:0061024;GO:0005623	cellular_component;transport;vesicle-mediated transport;molecular_function;membrane organization;cell
ENSONIG00000000734	DEAD (Asp-Glu-Ala-Asp) box helicase 42	ddx42	150.373	154.833	-1.02991	-0.0425222	7.26843	0.206157	0.649796	0.999804	1	protein_coding	ZDB-GENE-050706-53			GO:0005524;GO:0003676	ATP binding;nucleic acid binding	molecular_function	PTHR24031_SF125	ATP DEPENDENT RNA HELICASE DDX42 EC_3.6.4.13 DEAD BOX 42	GO:0003674;GO:0043167	molecular_function;ion binding
ENSONIG00000000735	XK, Kell blood group complex subunit-related family, member 7	xkr7	20.8012	21.2819	-1.01957	-0.0279656	4.4222	0.0330692	0.855701	0.999804	1	protein_coding	ZDB-GENE-051113-336			GO:0016021;GO:0016020	integral component of membrane;membrane	cellular_component	PTHR32129	XK RELATED	GO:0005575	cellular_component
ENSONIG00000000736	cyclin-dependent kinase 16	cdk16	312.108	292.962	1.06516	0.0910637	8.26043	0.907348	0.340819	0.999804	2	protein_coding	ZDB-GENE-030131-2939	100701773	I3IWD8;I3IWD7	GO:0006468;GO:0004672;GO:0005524	protein phosphorylation;protein kinase activity;ATP binding	biological_process;molecular_function	PTHR24056_SF174	CYCLIN DEPENDENT KINASE 16 EC_2.7.11.22 CELL DIVISION KINASE 16 PCTAIRE MOTIF KINASE 1 SERINE/THREONINE KINASE PCTAIRE 1	GO:0003674;GO:0043167;GO:0016301;GO:0006464	molecular_function;ion binding;kinase activity;cellular protein modification process
ENSONIG00000000737	prolyl 4-hydroxylase subunit alpha 1	p4ha1b	7.8266	9.24734	-1.17911	-0.237697	3.08979	1.47418	0.224687	0.999804	1	protein_coding	ZDB-GENE-030131-4089	100702773	I3IWD9	GO:0031418;GO:0016702;GO:0004656;GO:0005783;GO:0016705;GO:0005506;GO:0055114;GO:0016491;GO:0005515;GO:0046872;GO:0019511	L-ascorbic acid binding;oxidoreductase activity, acting on single donors with incorporation of molecular oxygen, incorporation of two atoms of oxygen;procollagen-proline 4-dioxygenase activity;endoplasmic reticulum;oxidoreductase activity, acting on paired donors, with incorporation or reduction of molecular oxygen;iron ion binding;oxidation-reduction process;oxidoreductase activity;protein bindi…	molecular_function;cellular_component;biological_process	PTHR10869_SF40	PROLYL 4 HYDROXYLASE SUBUNIT ALPHA 1 4 PH ALPHA 1 EC_1.14.11.2 PROCOLLAGEN PROLINE 2 OXOGLUTARATE 4 DIOXYGENASE SUBUNIT ALPHA 1	GO:0003674;GO:0016491;GO:0043167;GO:0005575;GO:0043226;GO:0005783;GO:0006464	molecular_function;oxidoreductase activity;ion binding;cellular_component;organelle;endoplasmic reticulum;cellular protein modification process	00330+1.14.11.2
ENSONIG00000000738	STE20 related adaptor alpha	strada	20.2883	20.2777	-1.00351	-0.00505196	4.29683	0.00146988	0.969417	0.999804	2	protein_coding	ZDB-GENE-030131-6482			GO:0006468;GO:0004672;GO:0005524	protein phosphorylation;protein kinase activity;ATP binding	biological_process;molecular_function	PTHR24361_SF248	STE20 RELATED KINASE ADAPTER ALPHA STRAD ALPHA STE20 RELATED ADAPTER	GO:0003674;GO:0043167;GO:0016301;GO:0006464	molecular_function;ion binding;kinase activity;cellular protein modification process
ENSONIG00000000740	helicase like transcription factor	hltf	14.2271	12.8526	1.1069	0.146527	3.83184	0.491562	0.483231	0.999804	2	protein_coding	ZDB-GENE-030131-3306	100711188	I3IWE4;I3IWE3	GO:0016818;GO:0008270;GO:0005524;GO:0003676	hydrolase activity, acting on acid anhydrides, in phosphorus-containing anhydrides;zinc ion binding;ATP binding;nucleic acid binding	molecular_function	PTHR10799_SF596	HELICASE TRANSCRIPTION FACTOR EC_2.3.2.27 EC_3.6.4.- RING TYPE E3 UBIQUITIN TRANSFERASE HLTF SWI/SNF RELATED MATRIX ASSOCIATED ACTIN DEPENDENT REGULATOR OF CHROMATIN SUBFAMILY A MEMBER 3 SUCROSE NONFERMENTING 2 3	GO:0003674;GO:0043167	molecular_function;ion binding
ENSONIG00000000741	ring finger protein 113A	rnf113a	35.383	36.9277	-1.0425	-0.0600503	5.19311	0.223456	0.636419	0.999804	1	protein_coding	ZDB-GENE-040825-1	100703695	I3IWE5	GO:0046872	metal ion binding	molecular_function	PTHR12930	PRE SPLICING FACTOR CWC24	GO:0003674;GO:0043167	molecular_function;ion binding
ENSONIG00000000742	D4, zinc and double PHD fingers, family 3	dpf3	2.72983	2.95448	-1.07504	-0.104388	1.54706	0.128168	0.720339	0.999804	1	protein_coding	ZDB-GENE-041014-190			GO:0071565;GO:0008270;GO:0046872;GO:0006355;GO:0048644;GO:0055008	nBAF complex;zinc ion binding;metal ion binding;regulation of transcription, DNA-templated;muscle organ morphogenesis;cardiac muscle tissue morphogenesis	cellular_component;molecular_function;biological_process	PTHR10615_SF12	ZINC FINGER DPF3 BRG1 ASSOCIATED FACTOR 45C BAF45C ZINC FINGER CER D4	GO:0003674;GO:0043167;GO:0032991;GO:0005575	molecular_function;ion binding;protein-containing complex;cellular_component
ENSONIG00000000743	ecdysoneless cell cycle regulator	ecd	15.393	14.9466	1.03463	0.0491109	3.98552	0.115295	0.734195	0.999804	2	protein_coding	ZDB-GENE-030131-6304	100710454	I3IWE8;I3IWE7				PTHR13060	ECDYSONELESS HOMOLOG SUPPRESSOR OF GCR TWO
ENSONIG00000000745	glutathione S-transferase theta 2	gstt2	8.63973	9.38303	-1.0901	-0.124465	3.2292	0.356977	0.55019	0.999804	1	protein_coding	ZDB-GENE-040426-1617			GO:0005515	protein binding	molecular_function	PTHR11260_SF148	GLUTATHIONE S TRANSFERASE THETA	GO:0003674	molecular_function	00480+2.5.1.18;00980+2.5.1.18;00983+2.5.1.18;00982+2.5.1.18
ENSONIG00000000746	DDB1 and CUL4 associated factor 4	wdr21	23.2946	24.9115	-1.07012	-0.097779	4.59496	0.666082	0.414421	0.999804	1	protein_coding	ZDB-GENE-040109-2	100698294	I3IWF1	GO:0005515	protein binding	molecular_function	PTHR22847_SF317	DDB1 AND CUL4 ASSOCIATED FACTOR 4	GO:0003674	molecular_function
ENSONIG00000000747	checkpoint kinase 2	chek2	10.6663	11.7436	-1.09718	-0.133795	3.56903	0.944255	0.331186	0.999804	1	protein_coding	ZDB-GENE-030131-8942			GO:0006468;GO:0004672;GO:0005524;GO:0005515;GO:0006974	protein phosphorylation;protein kinase activity;ATP binding;protein binding;cellular response to DNA damage stimulus	biological_process;molecular_function	PTHR24344_SF21	KINASE EC_2.7.11.1	GO:0003674;GO:0043167;GO:0016301;GO:0006464;GO:0006950	molecular_function;ion binding;kinase activity;cellular protein modification process;response to stress
ENSONIG00000000748	RUN domain-containing protein 3A	RUNDC3A	351.811	327.448	1.07442	0.103559	8.44798	1.29355	0.255394	0.999804	1	protein_coding		100703962	I3IWF3				PTHR22835_SF38	RUN DOMAIN CONTAINING 3A
ENSONIG00000000749	glycogenin 1a	gyg1a	19.5998	18.7324	1.04692	0.066155	4.22809	0.219422	0.639481	0.999804	1	protein_coding	ZDB-GENE-040426-2910			GO:0016757;GO:0016740	transferase activity, transferring glycosyl groups;transferase activity	molecular_function	PTHR11183_SF18	GLYCOGENIN 1 GN 1 GN1 EC_2.4.1.186	GO:0016757	transferase activity, transferring glycosyl groups
ENSONIG00000000750	activator of basal transcription 1	abt1	3.80064	3.5282	1.06639	0.0927382	2.05888	0.101902	0.749559	0.999804	2	protein_coding	ZDB-GENE-050522-127			GO:0003676	nucleic acid binding	molecular_function	PTHR12311	PRE RRNA PROCESSING ESF2 18S RRNA FACTOR 2	GO:0003674	molecular_function
ENSONIG00000000751	family with sequence similarity 149 member B1	fam149b1	13.4105	14.256	-1.06272	-0.0877653	3.80584	0.37832	0.538504	0.999804	2	protein_coding	ZDB-GENE-070112-2102	100710721	I3IWF8;I3IWF7				PTHR31997	UNKNOWN
ENSONIG00000000752	plastin 1 (I isoform)	pls1	3.29449	2.40851	1.36856	0.45266	1.56854	0.197801	0.656502	0.999804	2	protein_coding	ZDB-GENE-030131-6205			GO:0051017;GO:0051015;GO:0005509;GO:0005515;GO:0003779	actin filament bundle assembly;actin filament binding;calcium ion binding;protein binding;actin binding	biological_process;molecular_function	PTHR19961	PLASTIN	GO:0003674;GO:0043167;GO:0008092;GO:0022607	molecular_function;ion binding;cytoskeletal protein binding;cellular component assembly
ENSONIG00000000753	DNA repair protein RAD51 homolog 3	rad51c	10.6646	10.631	1.00598	0.00860538	3.45343	0.00202847	0.964077	0.999804	1	protein_coding	ZDB-GENE-041010-204	100702312	I3IWG1	GO:0006281;GO:0008094;GO:0005524;GO:0003677	DNA repair;DNA-dependent ATPase activity;ATP binding;DNA binding	biological_process;molecular_function	PTHR22942_SF14	DNA REPAIR RAD51 HOMOLOG 3 RAD51 HOMOLOG C RAD51 2	GO:0003674;GO:0003677;GO:0043167;GO:0016887;GO:0006259;GO:0006950;GO:0034641	molecular_function;DNA binding;ion binding;ATPase activity;DNA metabolic process;response to stress;cellular nitrogen compound metabolic process
ENSONIG00000000754	zinc finger, FYVE domain containing 1	zfyve1	23.6672	22.7827	1.03874	0.0548288	4.5423	0.103699	0.747435	0.999804	2	protein_coding	ZDB-GENE-131205-1			GO:0003924;GO:0008270;GO:0005525;GO:0046872	GTPase activity;zinc ion binding;GTP binding;metal ion binding	molecular_function	PTHR22835_SF151	ZINC FINGER FYVE DOMAIN CONTAINING 1	GO:0003674;GO:0043167;GO:0003924	molecular_function;ion binding;GTPase activity
ENSONIG00000000756	DnaJ (Hsp40) homolog, subfamily C, member 9	dnajc9	38.0372	37.966	1.0036	0.00518521	5.2395	0.00159639	0.968129	0.999804	1	protein_coding	ZDB-GENE-040718-130						PTHR24078_SF166	DNAJ HOMOLOG SUBFAMILY C MEMBER 9
ENSONIG00000000757	family with sequence similarity 117 member A	fam117aa	0.86228	1.13405	-1.30008	-0.378605	0.00844769	0.629184	0.427655	0.999804	1	protein_coding	ZDB-GENE-110606-4	102079493	I3IWG6				PTHR14972	INDUCED
ENSONIG00000000758	solute carrier family 35, member B1	slc35b1	29.4764	30.1479	-1.02644	-0.0376508	4.87949	0.0933957	0.759904	0.999804	1	protein_coding	ZDB-GENE-040912-148			GO:0055085;GO:0016020;GO:0016021	transmembrane transport;membrane;integral component of membrane	biological_process;cellular_component	PTHR10778_SF10	SOLUTE CARRIER FAMILY 35 MEMBER B1	GO:0006810;GO:0055085;GO:0005575	transport;transmembrane transport;cellular_component
ENSONIG00000000759	phosphatidylinositol glycan anchor biosynthesis, class H	pigh	21.3731	20.9879	1.01802	0.0257643	4.45314	0.0371914	0.847076	0.999804	1	protein_coding	ZDB-GENE-040718-303			GO:0017176;GO:0016020;GO:0016021	phosphatidylinositol N-acetylglucosaminyltransferase activity;membrane;integral component of membrane	molecular_function;cellular_component	PTHR15231	PHOSPHATIDYLINOSITOL N ACETYLGLUCOSAMINYLTRANSFERASE SUBUNIT H EC_2.4.1.198 PHOSPHATIDYLINOSITOL GLYCAN BIOSYNTHESIS CLASS H PIG H	GO:0016757;GO:0005575	transferase activity, transferring glycosyl groups;cellular_component	00563+2.4.1.198
ENSONIG00000000760	neuron-derived neurotrophic factor , like	ndnfl	22.5707	17.8244	1.26171	0.335379	4.40337	4.58448	0.0322628	0.999804	1	protein_coding	ZDB-GENE-131127-464			GO:0005515	protein binding	molecular_function	PTHR14619	NDNF PRECURSOR NEURON DERIVED NEUROTROPHIC FACTOR	GO:0003674	molecular_function
ENSONIG00000000761	coiled-coil serine rich protein 2	ccser2a	19.3057	17.9632	1.07238	0.100812	4.25544	0.393189	0.530628	0.999804	3	protein_coding	ZDB-GENE-131121-492	100710988	I3IWH2;I3IWH1;I3IWH0				PTHR22461	SERINE RICH COILED COIL DOMAIN CONTAINING COILED COIL SERINE RICH
ENSONIG00000000762	rho-related GTP-binding protein RhoV	rhov	40.5687	36.3678	1.11843	0.161469	5.33076	1.52657	0.216628	0.999804	1	protein_coding	ZDB-GENE-031002-10	100699098	I3IWH3	GO:0007264;GO:0003924;GO:0005622;GO:0005525;GO:0000166;GO:0055113;GO:0071896	small GTPase mediated signal transduction;GTPase activity;intracellular;GTP binding;nucleotide binding;epiboly involved in gastrulation with mouth forming second;protein localization to adherens junction	biological_process;molecular_function;cellular_component	PTHR24072_SF144	RHO RELATED GTP BINDING RHOV	GO:0003674;GO:0043167;GO:0005575;GO:0005622;GO:0003924;GO:0007165	molecular_function;ion binding;cellular_component;intracellular;GTPase activity;signal transduction
ENSONIG00000000763	TSR2, 20S rRNA accumulation, homolog (S. cerevisiae)	tsr2	6.44453	5.94667	1.09414	0.129798	2.67766	0.395122	0.529619	0.999804	1	protein_coding	ZDB-GENE-021231-2						PTHR21250	PRE RRNA PROCESSING TSR2
ENSONIG00000000764	VPS18, CORVET/HOPS core subunit	vps18	126.519	123.016	1.02867	0.0407789	6.97614	0.227901	0.633085	0.999804	1	protein_coding	ZDB-GENE-020419-33	100699365	I3IWH5	GO:0016192;GO:0006886;GO:0005515;GO:0005623;GO:0007634;GO:0008333;GO:0015721;GO:0043485;GO:0045176;GO:0048069;GO:0048757;GO:0060036	vesicle-mediated transport;intracellular protein transport;protein binding;cell;optokinetic behavior;endosome to lysosome transport;bile acid and bile salt transport;endosome to pigment granule transport;apical protein localization;eye pigmentation;pigment granule maturation;notochord cell vacuolation	biological_process;molecular_function;cellular_component	PTHR23323	VACUOLAR SORTING ASSOCIATED	GO:0003674;GO:0006810;GO:0016192;GO:0005575;GO:0005623;GO:0007034;GO:0043473;GO:0030154;GO:0021700;GO:0048856	molecular_function;transport;vesicle-mediated transport;cellular_component;cell;vacuolar transport;pigmentation;cell differentiation;developmental maturation;anatomical structure development
ENSONIG00000000765			370.499	343.388	1.07897	0.10966	8.46988	0.952082	0.32919	0.999804	1	protein_coding				GO:0007399	nervous system development	biological_process	PTHR23192_SF34	NOELIN PRECURSOR NEURONAL OLFACTOMEDIN RELATED ER LOCALIZED OLFACTOMEDIN 1	GO:0048856	anatomical structure development
ENSONIG00000000766	cytochrome c oxidase subunit NDUFA4	ndufa4l	242.166	206.247	1.17387	0.231274	7.80724	3.72101	0.0537319	0.999804	1	protein_coding	ZDB-GENE-040426-2756	100705042	I3IWH7	GO:0016020;GO:0016021	membrane;integral component of membrane	cellular_component	PTHR14256_SF4	CYTOCHROME C OXIDASE SUBUNIT NDUFA4	GO:0005575	cellular_component
ENSONIG00000000767	speckle-type POZ protein	spop	8.53384	8.62819	-1.0167	-0.023887	3.08758	0.0153203	0.901493	0.999804	1	protein_coding	ZDB-GENE-040426-1378			GO:0005515	protein binding	molecular_function	PTHR24413_SF97	POZ	GO:0003674	molecular_function
ENSONIG00000000768	glutamate receptor ionotropic, delta-1	grid1a	50.1189	54.5045	-1.08592	-0.118922	5.71984	1.23859	0.265742	0.999804	2	protein_coding	ZDB-GENE-120411-28	100703311	I3IWI0;I3IWH9	GO:0038023;GO:0005216;GO:0004970;GO:0006811;GO:0016020;GO:0016021;GO:0034220;GO:0005886;GO:0030054;GO:0035235;GO:0045202;GO:0045211	signaling receptor activity;ion channel activity;ionotropic glutamate receptor activity;ion transport;membrane;integral component of membrane;ion transmembrane transport;plasma membrane;cell junction;ionotropic glutamate receptor signaling pathway;synapse;postsynaptic membrane	molecular_function;biological_process;cellular_component	PTHR18966_SF108	GLUTAMATE RECEPTOR IONOTROPIC DELTA 1 PRECURSOR GLUD1 GLUR DELTA 1 SUBUNIT	GO:0005575;GO:0006810;GO:0022857;GO:0003674;GO:0055085;GO:0005886;GO:0007165	cellular_component;transport;transmembrane transporter activity;molecular_function;transmembrane transport;plasma membrane;signal transduction
ENSONIG00000000769	SRSF protein kinase 3	SRPK3	9.14647	10.9779	-1.20656	-0.270897	3.34172	2.79957	0.0942893	0.999804	1	protein_coding				GO:0006468;GO:0004672;GO:0005524	protein phosphorylation;protein kinase activity;ATP binding	biological_process;molecular_function	PTHR24055_SF100	SRSF KINASE 3 EC_2.7.11.1 MUSCLE SPECIFIC SERINE KINASE 1 MSSK 1 SERINE/ARGININE RICH SPECIFIC KINASE 3 SR SPECIFIC KINASE 3 SERINE/THREONINE KINASE 23	GO:0003674;GO:0043167;GO:0016301;GO:0006464	molecular_function;ion binding;kinase activity;cellular protein modification process
ENSONIG00000000770	ATR serine/threonine kinase	atr	4.54652	5.95557	-1.29751	-0.375741	2.37964	1.56384	0.211104	0.999804	1	protein_coding	ZDB-GENE-070912-458			GO:0016301;GO:0004674;GO:0005515;GO:0016740;GO:0000166;GO:0005524;GO:0016310;GO:0003140;GO:0006468;GO:0008630;GO:0035469;GO:0060271;GO:1901207	kinase activity;protein serine/threonine kinase activity;protein binding;transferase activity;nucleotide binding;ATP binding;phosphorylation;determination of left/right asymmetry in lateral mesoderm;protein phosphorylation;intrinsic apoptotic signaling pathway in response to DNA damage;determination of pancreatic left/right asymmetry;cilium assembly;regulation of heart looping	molecular_function;biological_process	PTHR11139_SF64	SERINE/THREONINE KINASE ATR EC_2.7.11.1 ATAXIA TELANGIECTASIA AND RAD3 RELATED	GO:0003674;GO:0016301;GO:0043167;GO:0048856;GO:0006464;GO:0006950;GO:0007165;GO:0022607	molecular_function;kinase activity;ion binding;anatomical structure development;cellular protein modification process;response to stress;signal transduction;cellular component assembly	04151+2.7.11.1;04150+2.7.11.1;05165+2.7.11.1;04926+2.7.11.1;04714+2.7.11.1;05170+2.7.11.1;05163+2.7.11.1
ENSONIG00000000771	formin-binding protein 1		80.9677	91.9893	-1.13609	-0.184082	6.41981	3.75956	0.0525065	0.999804	2	protein_coding		100709101	I3IWI3;I3IWI4	GO:0005515	protein binding	molecular_function	PTHR12602	FORMIN BINDING 1	GO:0003674	molecular_function
ENSONIG00000000772	INO80 complex subunit	ino80	30.3073	35.012	-1.15685	-0.2102	5.02354	2.55759	0.109766	0.999804	2	protein_coding	ZDB-GENE-041014-72	100693857	I3IWI6;I3IWI5	GO:0031011;GO:0006338;GO:0006281;GO:0016887;GO:0006351;GO:0005524;GO:0005634;GO:0003677	Ino80 complex;chromatin remodeling;DNA repair;ATPase activity;transcription, DNA-templated;ATP binding;nucleus;DNA binding	cellular_component;biological_process;molecular_function	PTHR10799_SF213	CHROMATIN REMODELING ATPASE INO80 EC_3.6.4.-	GO:0003674;GO:0003677;GO:0005575;GO:0043226;GO:0005634;GO:0043167;GO:0009058;GO:0034641;GO:0016887;GO:0006259;GO:0006950;GO:0032991	molecular_function;DNA binding;cellular_component;organelle;nucleus;ion binding;biosynthetic process;cellular nitrogen compound metabolic process;ATPase activity;DNA metabolic process;response to stress;protein-containing complex
ENSONIG00000000773	neurexophilin-1	nxph3	60.4799	62.593	-1.03429	-0.0486405	5.93703	0.156956	0.691975	0.999804	1	protein_coding	ZDB-GENE-131121-356	100693235	I3IWI7				PTHR17103	NEUREXOPHILIN PRECURSOR
ENSONIG00000000774			16.5501	18.7476	-1.12858	-0.174503	4.1973	1.68218	0.194635	0.999804	1	protein_coding				GO:0005737;GO:0005515	cytoplasm;protein binding	cellular_component;molecular_function	PTHR10661_SF15	ENDOPHILIN B1 SH3 DOMAIN CONTAINING GRB2 B1	GO:0003674;GO:0005575;GO:0005737	molecular_function;cellular_component;cytoplasm
ENSONIG00000000775	nerve growth factor receptor a (TNFR superfamily, member 16)	ngfra	366.435	362.43	1.01122	0.0161003	8.52874	0.0232018	0.878933	0.999804	1	protein_coding	ZDB-GENE-050928-1			GO:0005515;GO:0016020;GO:0016021	protein binding;membrane;integral component of membrane	molecular_function;cellular_component	PTHR23097_SF13	TUMOR NECROSIS FACTOR RECEPTOR SUPERFAMILY MEMBER 16 PRECURSOR GP80 LNGFR LOW AFFINITY NEUROTROPHIN RECEPTOR P75NTR LOW AFFINITY NERVE GROWTH FACTOR RECEPTOR NGF RECEPTOR P75 ICD CD271 ANTIGEN	GO:0003674;GO:0005575	molecular_function;cellular_component
ENSONIG00000000777	WAPL cohesin release factor	wapla	30.7523	29.5097	1.04298	0.0607101	4.98874	0.290488	0.589908	0.999804	4	protein_coding	ZDB-GENE-131010-1	100711254	I3IWJ5;I3IWJ4;I3IWJ3;I3IWJ2				PTHR22100	WINGS APART HOMOLOG WAPL COHESIN RELEASE FACTOR
ENSONIG00000000778	band 3 anion exchange protein	slc4a1a	6.47948	6.80246	-1.05159	-0.0725772	2.95387	0.0341934	0.853296	0.999804	1	protein_coding	ZDB-GENE-010525-1	100705836	I3IWJ6	GO:0005452;GO:0008509;GO:0006820;GO:0016021;GO:0016020;GO:0006811;GO:0015698;GO:0030218;GO:0035162;GO:0098656	inorganic anion exchanger activity;anion transmembrane transporter activity;anion transport;integral component of membrane;membrane;ion transport;inorganic anion transport;erythrocyte differentiation;embryonic hemopoiesis;anion transmembrane transport	molecular_function;biological_process;cellular_component	PTHR11453_SF12	BAND 3 ANION TRANSPORT ANION EXCHANGE 1 AE 1 ANION EXCHANGER 1 SOLUTE CARRIER FAMILY 4 MEMBER 1 CD233 ANTIGEN	GO:0005575;GO:0006810;GO:0022857;GO:0003674;GO:0002376;GO:0042592;GO:0030154;GO:0048856;GO:0055085	cellular_component;transport;transmembrane transporter activity;molecular_function;immune system process;homeostatic process;cell differentiation;anatomical structure development;transmembrane transport
ENSONIG00000000779			94.7072	89.4257	1.05873	0.0823331	6.56147	0.956826	0.327988	0.999804	1	protein_coding				GO:0016021;GO:0016020	integral component of membrane;membrane	cellular_component	PTHR22911	SOLUTE CARRIER FAMILY 35 MEMBER ACYL MALONYL CONDENSING ENZYME 1	GO:0005575	cellular_component
ENSONIG00000000780	stromal antigen 1	stag1a	56.9026	57.4413	-1.01042	-0.0149585	5.822	0.0218415	0.88251	0.999804	2	protein_coding	ZDB-GENE-070912-448	100690993	I3IWJ8;I3IWJ9				PTHR11199	COHESIN SUBUNIT SA SCC3 HOMOLOG STROMAL ANTIGEN
ENSONIG00000000781	ChaC glutathione specific gamma-glutamylcyclotransferase 1	chac1	302.117	303.574	-1.00425	-0.00611588	8.26674	0.00378725	0.950929	0.999804	1	protein_coding	ZDB-GENE-030131-1957	100699638	I3IWK0	GO:0006751;GO:0003839;GO:0016829;GO:0061928	glutathione catabolic process;gamma-glutamylcyclotransferase activity;lyase activity;glutathione specific gamma-glutamylcyclotransferase activity	biological_process;molecular_function	PTHR12192	GLUTATHIONE SPECIFIC GAMMA GLUTAMYLCYCLOTRANSFERASE 2 GAMMA GCG 2 EC_4.3.2.7 CATION TRANSPORT REGULATOR 2	GO:0016829;GO:0009056;GO:0006790;GO:0034641;GO:0051186	lyase activity;catabolic process;sulfur compound metabolic process;cellular nitrogen compound metabolic process;cofactor metabolic process	00480+4.3.2.7
ENSONIG00000000782	delta like canonical Notch ligand 4	dll4	15.3749	13.0772	1.17888	0.237419	3.86613	1.97765	0.159638	0.999804	2	protein_coding	ZDB-GENE-041014-73	100699902	I3IWK2;I3IWK1	GO:0007275;GO:0007219;GO:0007154;GO:0016021;GO:0005509;GO:0016020;GO:0001525;GO:0001569;GO:0001946;GO:0002040;GO:0002043;GO:0021514;GO:0030947;GO:0033340;GO:0035907;GO:0043534;GO:0043537;GO:0045765;GO:0060840;GO:0060841;GO:0060854;GO:0060855;GO:1903670	multicellular organism development;Notch signaling pathway;cell communication;integral component of membrane;calcium ion binding;membrane;angiogenesis;branching involved in blood vessel morphogenesis;lymphangiogenesis;sprouting angiogenesis;blood vessel endothelial cell proliferation involved in sprouting angiogenesis;ventral spinal cord interneuron differentiation;regulation of vascular endothel…	biological_process;cellular_component;molecular_function	PTHR24044_SF223	DELTA	GO:0005575;GO:0003674;GO:0043167;GO:0007165;GO:0048856;GO:0048646;GO:0008283;GO:0030154;GO:0048870;GO:0040011	cellular_component;molecular_function;ion binding;signal transduction;anatomical structure development;anatomical structure formation involved in morphogenesis;cell population proliferation;cell differentiation;cell motility;locomotion
ENSONIG00000000783	plexin-B1	plxnb3	80.4862	78.4685	1.02571	0.0366242	6.3179	0.140763	0.707524	0.999804	1	protein_coding	ZDB-GENE-081104-53	100703115	I3IWK3	GO:0071526;GO:0017154;GO:0007165;GO:0005515;GO:0016020;GO:0016021	semaphorin-plexin signaling pathway;semaphorin receptor activity;signal transduction;protein binding;membrane;integral component of membrane	biological_process;molecular_function;cellular_component	PTHR22625	PLEXIN PRECURSOR	GO:0003674;GO:0007165;GO:0005575	molecular_function;signal transduction;cellular_component
ENSONIG00000000784	serine protease HTRA1A	htra1a	6.7622	5.85048	1.15316	0.205594	2.757	0.777522	0.3779	0.999804	1	protein_coding	ZDB-GENE-040704-64	100711526	I3IWK4	GO:0004252;GO:0005520;GO:0006508;GO:0005576;GO:0005515;GO:0040036	serine-type endopeptidase activity;insulin-like growth factor binding;proteolysis;extracellular region;protein binding;regulation of fibroblast growth factor receptor signaling pathway	molecular_function;biological_process;cellular_component	PTHR22939_SF13	SERINE PROTEASE HTRA1 PRECURSOR EC_3.4.21.- HIGH TEMPERATURE REQUIREMENT A SERINE PEPTIDASE 1 SERINE PROTEASE 11	GO:0003674;GO:0005575;GO:0005576;GO:0008233	molecular_function;cellular_component;extracellular region;peptidase activity
ENSONIG00000000785	mediator complex subunit 27	med27	35.1493	38.2053	-1.08835	-0.122137	5.20444	0.795231	0.372523	0.999804	1	protein_coding	ZDB-GENE-040426-1601	100700227	I3IWK5	GO:0016592;GO:0043010;GO:0046549	mediator complex;camera-type eye development;retinal cone cell development	cellular_component;biological_process	PTHR13130	MEDIATOR OF RNA POLYMERASE II TRANSCRIPTION SUBUNIT 27 COFACTOR REQUIRED SP1 TRANSCRIPTIONAL ACTIVATION SUBUNIT 8 CRSP COMPLEX SUBUNIT 8 MEDIATOR COMPLEX SUBUNIT 27	GO:0032991;GO:0005575;GO:0048856;GO:0030154	protein-containing complex;cellular_component;anatomical structure development;cell differentiation
ENSONIG00000000786	synapse differentiation-inducing gene protein 1-like	syndig1l	260.233	246.095	1.05725	0.0803148	7.97816	0.602817	0.437505	0.999804	1	protein_coding	ZDB-GENE-041001-116	100700169	I3IWK6	GO:0016021;GO:0016020	integral component of membrane;membrane	cellular_component	PTHR14768	SYNAPSE DIFFERENTIATION INDUCING GENE 1 DISPANIN SUBFAMILY C MEMBER TRANSMEMBRANE	GO:0005575	cellular_component
ENSONIG00000000788	mitochondrial basic amino acids transporter	slc25a29	16.4671	19.3976	-1.17982	-0.238562	4.12336	1.6075	0.204843	0.999804	1	protein_coding	ZDB-GENE-050913-70	100700714	I3IWK9	GO:0055085;GO:0022857;GO:0016020;GO:0016021	transmembrane transport;transmembrane transporter activity;membrane;integral component of membrane	biological_process;molecular_function;cellular_component	PTHR24089_SF201	MITOCHONDRIAL BASIC AMINO ACIDS TRANSPORTER CARNITINE/ACYLCARNITINE TRANSLOCASE CACT MITOCHONDRIAL CARNITINE/ACYLCARNITINE CARRIER CACL MITOCHONDRIAL ORNITHINE TRANSPORTER 3 SOLUTE CARRIER FAMILY 25 MEMBER 29	GO:0022857;GO:0003674;GO:0006810;GO:0055085;GO:0005575	transmembrane transporter activity;molecular_function;transport;transmembrane transport;cellular_component
ENSONIG00000000789	netrin g2a	ntng2a	2.41741	2.61023	-1.08167	-0.113267	1.22946	0.0938345	0.759358	0.999804	1	protein_coding	ZDB-GENE-081105-186						PTHR10574_SF28	NETRIN PRECURSOR LAMINET
ENSONIG00000000790	pleckstrin homology domain-containing family A member 1	plekha1a	32.0415	22.4208	1.42941	0.515415	4.82227	1.33724	0.247522	0.999804	1	protein_coding	ZDB-GENE-040426-2780	100711797	I3IWL1				PTHR14336_SF4	PLECKSTRIN HOMOLOGY DOMAIN CONTAINING FAMILY A MEMBER 1 PH DOMAIN CONTAINING FAMILY A MEMBER 1 TANDEM PH DOMAIN CONTAINING 1 TAPP 1
ENSONIG00000000791	solute carrier family 25 member 47	slc25a47a	138.523	131.003	1.05687	0.0798022	7.07548	0.583658	0.444882	0.999804	2	protein_coding	ZDB-GENE-060616-266	100700982	I3IWL3;I3IWL2	GO:0055085;GO:0022857;GO:0016020;GO:0016021	transmembrane transport;transmembrane transporter activity;membrane;integral component of membrane	biological_process;molecular_function;cellular_component	PTHR24089_SF224	SOLUTE CARRIER FAMILY 25 MEMBER 47 HEPATOCELLULAR CARCINOMA DOWN REGULATED MITOCHONDRIAL CARRIER	GO:0022857;GO:0003674;GO:0006810;GO:0055085;GO:0005575	transmembrane transporter activity;molecular_function;transport;transmembrane transport;cellular_component
ENSONIG00000000792	endonuclease G	endog	8.09428	8.03859	1.00722	0.0103813	3.07054	0.00337995	0.953639	0.999804	1	protein_coding	ZDB-GENE-050522-402			GO:0046872;GO:0016787;GO:0003676	metal ion binding;hydrolase activity;nucleic acid binding	molecular_function	PTHR13966_SF0	ENDONUCLEASE G MITOCHONDRIAL PRECURSOR ENDO G EC_3.1.30.-	GO:0003674;GO:0043167	molecular_function;ion binding
ENSONIG00000000793	ATP-binding cassette sub-family D member 1	abcd1	14.9558	15.8029	-1.0541	-0.0760098	3.99626	0.183367	0.668496	0.999804	2	protein_coding	ZDB-GENE-050517-27	100703385	I3IWL5;I3IWL6	GO:0005778;GO:0006635;GO:0042626;GO:0016887;GO:0055085;GO:0016021;GO:0005524;GO:0000166;GO:0000038;GO:0014003;GO:0030301;GO:0030325;GO:0031643;GO:0036269;GO:0061744	peroxisomal membrane;fatty acid beta-oxidation;ATPase activity, coupled to transmembrane movement of substances;ATPase activity;transmembrane transport;integral component of membrane;ATP binding;nucleotide binding;very long-chain fatty acid metabolic process;oligodendrocyte development;cholesterol transport;adrenal gland development;positive regulation of myelination;swimming behavior;motor behav…	cellular_component;biological_process;molecular_function	PTHR11384	ATP BINDING CASSETTE SUB FAMILY D MEMBER	GO:0003674;GO:0043167;GO:0005575;GO:0006810;GO:0055085;GO:0016887;GO:0022857;GO:0044281;GO:0009056;GO:0006629;GO:0043226;GO:0048856;GO:0030154	molecular_function;ion binding;cellular_component;transport;transmembrane transport;ATPase activity;transmembrane transporter activity;small molecule metabolic process;catabolic process;lipid metabolic process;organelle;anatomical structure development;cell differentiation
ENSONIG00000000794	phosphatase and actin regulator 2	phactr2	25.5018	27.1708	-1.06785	-0.0947113	4.71579	0.34696	0.555839	0.999804	3	protein_coding	ZDB-GENE-040724-11	100712063	I3IWL8;I3IWL9;I3IWL7	GO:0003779;GO:0004864;GO:0032515	actin binding;protein phosphatase inhibitor activity;negative regulation of phosphoprotein phosphatase activity	molecular_function;biological_process	PTHR12751_SF5	PHOSPHATASE AND ACTIN REGULATOR 2	GO:0003674;GO:0008092;GO:0008150;GO:0030234	molecular_function;cytoskeletal protein binding;biological_process;enzyme regulator activity
ENSONIG00000000795	serine/threonine-protein phosphatase 2A 56 kDa regulatory subunit gamma isoform	ppp2r5cb	141.558	135.608	1.04417	0.0623532	7.15753	0.400973	0.526587	0.999804	2	protein_coding	ZDB-GENE-041014-4	100694131	I3IWM1;I3IWM0	GO:0000159;GO:0019888;GO:0007165;GO:0043666	protein phosphatase type 2A complex;protein phosphatase regulator activity;signal transduction;regulation of phosphoprotein phosphatase activity	cellular_component;molecular_function;biological_process	PTHR10257	SERINE/THREONINE PHOSPHATASE 2A 56 KDA REGULATORY SUBUNIT PP2A B SUBUNIT B' PP2A B SUBUNIT B56 PP2A B SUBUNIT PR61 PP2A B SUBUNIT R5	GO:0007165;GO:0003674;GO:0008150;GO:0030234;GO:0032991;GO:0005575	signal transduction;molecular_function;biological_process;enzyme regulator activity;protein-containing complex;cellular_component
ENSONIG00000000796	upstream binding transcription factor	ubtf	116.614	115.41	1.01033	0.0148274	6.86333	0.0273199	0.868718	0.999804	1	protein_coding	ZDB-GENE-030616-252			GO:0003677;GO:0005634	DNA binding;nucleus	molecular_function;cellular_component	PTHR13711_SF178	TRANSCRIPTION FACTOR	GO:0003674;GO:0003677;GO:0005575;GO:0043226;GO:0005634	molecular_function;DNA binding;cellular_component;organelle;nucleus
ENSONIG00000000798	propionyl-CoA carboxylase subunit beta	pccb	64.299	58.753	1.09474	0.13059	5.9401	2.22518	0.135777	0.999804	1	protein_coding	ZDB-GENE-040426-2467	100698741	I3IWM4	GO:0016874	ligase activity	molecular_function	PTHR22855_SF14	PROPIONYL COA CARBOXYLASE BETA CHAIN MITOCHONDRIAL PRECURSOR PCCASE SUBUNIT BETA EC_6.4.1.3 PROPANOYL COA:CARBON DIOXIDE LIGASE SUBUNIT BETA	GO:0016874	ligase activity
ENSONIG00000000799	adenylate kinase isoenzyme 5		1.0068	1.19468	-1.19747	-0.259993	0.35712	0.311372	0.57684	0.999804	2	protein_coding		100710177	I3IWM5;I3IWM6	GO:0019205;GO:0006139;GO:0005524;GO:0016740;GO:0016301;GO:0016310	nucleobase-containing compound kinase activity;nucleobase-containing compound metabolic process;ATP binding;transferase activity;kinase activity;phosphorylation	molecular_function;biological_process	PTHR23359_SF79	ADENYLATE KINASE ISOENZYME 5 AK 5 EC_2.7.4.3 EC_2.7.4.- 6 ATP AMP TRANSPHOSPHORYLASE 5	GO:0003674;GO:0043167;GO:0034641;GO:0016301	molecular_function;ion binding;cellular nitrogen compound metabolic process;kinase activity	00730+2.7.4.3;00230+2.7.4.3
ENSONIG00000000800			1.03276	1.08347	-1.06509	-0.0909703	0.342338	0.0537215	0.81671	0.999804	1	protein_coding				GO:0120103	centriolar subdistal appendage	cellular_component			GO:0032991;GO:0005575	protein-containing complex;cellular_component
ENSONIG00000000801	host cell factor 1	hcfc1b	20.0064	22.4863	-1.11976	-0.163196	4.46002	1.46664	0.225877	0.999804	2	protein_coding	ZDB-GENE-030131-2411	100703662	I3IWM9;I3IWM8	GO:0071339;GO:0048188;GO:0005515;GO:0002062;GO:0048703	MLL1 complex;Set1C/COMPASS complex;protein binding;chondrocyte differentiation;embryonic viscerocranium morphogenesis	cellular_component;molecular_function;biological_process	PTHR23244_SF289	HOST CELL FACTOR	GO:0003674;GO:0032991;GO:0005575;GO:0048856;GO:0030154;GO:0009790	molecular_function;protein-containing complex;cellular_component;anatomical structure development;cell differentiation;embryo development
ENSONIG00000000802			4.25783	3.5901	1.19721	0.259676	1.97462	0.83234	0.361597	0.999804	1	protein_coding				GO:0005515	protein binding	molecular_function	PTHR10845_SF4	REGULATOR OF G SIGNALING 3 RGS3	GO:0003674	molecular_function
ENSONIG00000000803	delta-type opioid receptor	oprm1	307.473	309.463	-1.00652	-0.00937659	8.26233	0.00633661	0.936553	0.999804	1	protein_coding	ZDB-GENE-010125-1	100712332	I3IWN1	GO:0004979;GO:0004985;GO:0016021;GO:0007186;GO:0004930;GO:0016020;GO:0007165;GO:0007218;GO:0038046;GO:0038047;GO:0038003;GO:0071315;GO:0005887	beta-endorphin receptor activity;opioid receptor activity;integral component of membrane;G protein-coupled receptor signaling pathway;G protein-coupled receptor activity;membrane;signal transduction;neuropeptide signaling pathway;enkephalin receptor activity;morphine receptor activity;opioid receptor signaling pathway;cellular response to morphine;integral component of plasma membrane	molecular_function;cellular_component;biological_process	PTHR24229_SF7	MU TYPE OPIOID RECEPTOR M OR 1 MOR 1	GO:0003674;GO:0007165;GO:0005575	molecular_function;signal transduction;cellular_component
ENSONIG00000000804	regulator of G-protein signaling 17	rgs17	15.0767	15.8896	-1.05303	-0.0745428	3.88839	0.215971	0.642127	0.999804	2	protein_coding	ZDB-GENE-040718-229	100703854	I3IWN2;I3IWN3				PTHR10845_SF133	REGULATOR OF G SIGNALING 17 RGS17
ENSONIG00000000805	heat shock protein HSP 90-alpha	hsp90aa1.2	542.466	558.629	-1.03	-0.042651	9.13961	0.193201	0.660266	0.999804	1	protein_coding	ZDB-GENE-031001-3	100701982	I3IWN4	GO:0006457;GO:0051082;GO:0005524;GO:0009408;GO:0009409;GO:0046677;GO:0005634;GO:0005737	protein folding;unfolded protein binding;ATP binding;response to heat;response to cold;response to antibiotic;nucleus;cytoplasm	biological_process;molecular_function;cellular_component	PTHR11528	HEAT SHOCK	GO:0003674;GO:0043167;GO:0051082;GO:0006457;GO:0006950;GO:0005575;GO:0043226;GO:0005634;GO:0005737	molecular_function;ion binding;unfolded protein binding;protein folding;response to stress;cellular_component;organelle;nucleus;cytoplasm
ENSONIG00000000806	interleukin-1 receptor-associated kinase 1	irak1	5.42497	4.07322	1.30731	0.386604	2.32698	2.87327	0.0900617	0.999804	1	protein_coding	ZDB-GENE-071116-5			GO:0070498;GO:0004674;GO:0006468;GO:0004672;GO:0005524	interleukin-1-mediated signaling pathway;protein serine/threonine kinase activity;protein phosphorylation;protein kinase activity;ATP binding	biological_process;molecular_function	PTHR24419_SF1	INTERLEUKIN 1 RECEPTOR ASSOCIATED KINASE 1 IRAK 1 EC_2.7.11.1	GO:0003674;GO:0043167;GO:0016301;GO:0006464;GO:0007165	molecular_function;ion binding;kinase activity;cellular protein modification process;signal transduction	04151+2.7.11.1;04150+2.7.11.1;05165+2.7.11.1;04926+2.7.11.1;04714+2.7.11.1;05170+2.7.11.1;05163+2.7.11.1
ENSONIG00000000807	E3 ubiquitin-protein ligase MSL2	msl2a	41.1894	45.7115	-1.10825	-0.148282	5.45436	1.62795	0.201987	0.999804	2	protein_coding	ZDB-GENE-070912-449	100691257	I3IWN7;I3IWN6	GO:0072487;GO:0061630;GO:0016567	MSL complex;ubiquitin protein ligase activity;protein ubiquitination	cellular_component;molecular_function;biological_process	PTHR16048	E3 UBIQUITIN LIGASE MSL2 EC_2.3.2.- E3 UBIQUITIN TRANSFERASE MSL2 MALE SPECIFIC LETHAL 2 1 MSL2 1 MALE SPECIFIC LETHAL 2 HOMOLOG MSL 2 MALE SPECIFIC LETHAL 2 HOMOLOG 1 RING FINGER 184	GO:0032991;GO:0005575;GO:0006464	protein-containing complex;cellular_component;cellular protein modification process
ENSONIG00000000808	pecanex 2	pcnx2	104.681	106.3	-1.01542	-0.0220802	6.72504	0.0361164	0.849275	0.999804	3	protein_coding	ZDB-GENE-090312-150	100689710	I3IWN9;I3IWP0;I3IWN8	GO:0016021;GO:0016020	integral component of membrane;membrane	cellular_component	PTHR12372_SF5	PECANEX 2 PECANEX HOMOLOG 2	GO:0005575	cellular_component
ENSONIG00000000809	methyl CpG binding protein 2	mecp2	18.6753	16.0762	1.15553	0.208549	4.11041	1.93435	0.164283	0.999804	1	protein_coding	ZDB-GENE-030131-7190			GO:0000122;GO:0010385;GO:0005634;GO:0003677;GO:0003700;GO:0006954;GO:0007528;GO:0007626;GO:0045664;GO:0050975;GO:0060385;GO:0061564;GO:0099054	negative regulation of transcription by RNA polymerase II;double-stranded methylated DNA binding;nucleus;DNA binding;DNA-binding transcription factor activity;inflammatory response;neuromuscular junction development;locomotory behavior;regulation of neuron differentiation;sensory perception of touch;axonogenesis involved in innervation;axon development;presynapse assembly	biological_process;molecular_function;cellular_component	PTHR15074	METHYL CPG BINDING 2 MECP 2 MECP2	GO:0003674;GO:0003677;GO:0005575;GO:0043226;GO:0005634;GO:0003700;GO:0006950;GO:0050877;GO:0048856;GO:0022607	molecular_function;DNA binding;cellular_component;organelle;nucleus;DNA-binding transcription factor activity;response to stress;nervous system process;anatomical structure development;cellular component assembly
ENSONIG00000000810	tumor necrosis factor ligand superfamily member 10		0.930959	2.00851	-2.15827	-1.10988	0.813866	6.93163	0.00846843	0.999804	1	protein_coding		100691526	I3IWP2	GO:0005164;GO:0006955;GO:0016020;GO:0005515;GO:0010469;GO:0046872;GO:0005125;GO:0005615	tumor necrosis factor receptor binding;immune response;membrane;protein binding;regulation of signaling receptor activity;metal ion binding;cytokine activity;extracellular space	molecular_function;biological_process;cellular_component	PTHR11471	TUMOR NECROSIS FACTOR PRECURSOR CACHECTIN TNF ALPHA TUMOR NECROSIS FACTOR LIGAND SUPERFAMILY MEMBER 2 TNF A [CONTAINS TUMOR NECROSIS FACTOR MEMBRANE FORM N TERMINAL FRAGMENT NTF ; INTRACELLULAR DOMAIN 1 ICD1 ; INTRACELLULAR DOMAIN 2 ICD2 ; C DOMAIN 1; C DOMAIN 2; TUMOR NECROSIS FACTOR SOLUBLE FORM]	GO:0003674;GO:0005575;GO:0002376;GO:0008150;GO:0043167;GO:0005615	molecular_function;cellular_component;immune system process;biological_process;ion binding;extracellular space
ENSONIG00000000812	ataxin 7-like 3	atxn7l3	28.6883	26.5238	1.08179	0.113415	4.7311	0.696304	0.404028	0.999804	1	protein_coding	ZDB-GENE-030616-253		I3IWP4	GO:0005634;GO:0046872;GO:0008270;GO:0003713;GO:0006325;GO:0016578;GO:0045893;GO:0000124;GO:0071819	nucleus;metal ion binding;zinc ion binding;transcription coactivator activity;chromatin organization;histone deubiquitination;positive regulation of transcription, DNA-templated;SAGA complex;DUBm complex	cellular_component;molecular_function;biological_process	PTHR15117_SF6	ATAXIN 7 3 SAGA ASSOCIATED FACTOR 11 HOMOLOG	GO:0005575;GO:0043226;GO:0005634;GO:0003674;GO:0043167;GO:0006464;GO:0032991	cellular_component;organelle;nucleus;molecular_function;ion binding;cellular protein modification process;protein-containing complex
ENSONIG00000000813	neutral cholesterol ester hydrolase 1	nceh1a	18.4842	15.5445	1.1888	0.24951	4.17185	1.98817	0.158532	0.999804	1	protein_coding	ZDB-GENE-040711-2	100691795	I3IWP5	GO:0052689;GO:0016021;GO:0016787	carboxylic ester hydrolase activity;integral component of membrane;hydrolase activity	molecular_function;cellular_component	PTHR23024_SF108	NEUTRAL CHOLESTEROL ESTER HYDROLASE 1 NCEH EC_3.1.1.- ARYLACETAMIDE DEACETYLASE 1	GO:0005575	cellular_component
ENSONIG00000000814	transmembrane and ubiquitin-like domain containing 2	tmub2	35.4476	34.1599	1.03888	0.055025	5.10547	0.232624	0.629585	0.999804	1	protein_coding	ZDB-GENE-030616-254			GO:0030433;GO:0005515;GO:0016020;GO:0016021	ubiquitin-dependent ERAD pathway;protein binding;membrane;integral component of membrane	biological_process;molecular_function;cellular_component	PTHR14557	TRANSMEMBRANE AND UBIQUITIN DOMAIN CONTAINING	GO:0003674;GO:0009056;GO:0006950;GO:0005575	molecular_function;catabolic process;response to stress;cellular_component
ENSONIG00000000815	protein phosphatase 2, regulatory subunit B'', alpha	ppp2r3a	40.0503	36.225	1.106	0.145347	5.20764	1.08799	0.296917	0.999804	1	protein_coding	ZDB-GENE-070912-646			GO:0005509	calcium ion binding	molecular_function	PTHR14095_SF3	SERINE/THREONINE PHOSPHATASE 2A REGULATORY SUBUNIT B'' SUBUNIT PP2A B'' PP2A SUBUNIT B SERINE/THREONINE PHOSPHATASE 2A REGULATORY SUBUNIT	GO:0003674;GO:0043167	molecular_function;ion binding
ENSONIG00000000816	ankyrin repeat and SOCS box containing 16	asb16	0.549576	0.71356	-1.27317	-0.34842	-0.705671	0.250321	0.616849	0.999804	2	protein_coding	ZDB-GENE-031031-3	100706904	I3IWP9;I3IWP8	GO:0005515;GO:0035556;GO:0016567	protein binding;intracellular signal transduction;protein ubiquitination	molecular_function;biological_process	PTHR24188_SF2	ANKYRIN REPEAT AND SOCS BOX 16 ASB 16	GO:0003674;GO:0007165;GO:0006464	molecular_function;signal transduction;cellular protein modification process
ENSONIG00000000817	FYVE, RhoGEF and PH domain containing 1	fgd1	20.3405	23.1831	-1.14154	-0.190976	4.40496	0.662233	0.415773	0.999804	1	protein_coding	ZDB-GENE-081104-33			GO:0035023;GO:0005089;GO:0046872	regulation of Rho protein signal transduction;Rho guanyl-nucleotide exchange factor activity;metal ion binding	biological_process;molecular_function	PTHR12673_SF79	FYVE RHOGEF AND PH DOMAIN CONTAINING 1 FACIOGENITAL DYSPLASIA 1 RHO/RAC GUANINE NUCLEOTIDE EXCHANGE FACTOR FGD1 RHO/RAC GEF ZINC FINGER FYVE DOMAIN CONTAINING 3	GO:0003674;GO:0043167	molecular_function;ion binding
ENSONIG00000000818	PHD finger protein 19	phf19	1.8397	2.43485	-1.3358	-0.417699	1.13006	1.24434	0.264636	0.999804	1	protein_coding	ZDB-GENE-081105-128			GO:0046872	metal ion binding	molecular_function	PTHR12628	PHD FINGER POLYCOMB	GO:0003674;GO:0043167	molecular_function;ion binding
ENSONIG00000000820			10.1358	12.3672	-1.22131	-0.288435	3.56439	4.1719	0.0410996	0.999804	1	protein_coding				GO:0045670;GO:0006959;GO:0045893;GO:0006355;GO:0046983	regulation of osteoclast differentiation;humoral immune response;positive regulation of transcription, DNA-templated;regulation of transcription, DNA-templated;protein dimerization activity	biological_process;molecular_function	PTHR10014_SF37	TRANSCRIPTION FACTOR E3	GO:0003674;GO:0002376	molecular_function;immune system process
ENSONIG00000000821	si:dkey-260c8.8	si:dkey-260c8.8	2.78764	3.11736	-1.1187	-0.161821	1.48059	0.115831	0.733601	0.999804	1	protein_coding	ZDB-GENE-030131-5375						PTHR14523	UNCHARACTERIZED
ENSONIG00000000822	acid sensing ion channel subunit 2	asic2	62.6822	61.9173	1.01323	0.0189605	5.94378	0.034145	0.853399	0.999804	1	protein_coding	ZDB-GENE-040513-4	100707165	I3IWQ5	GO:0015280;GO:0006814;GO:0005272;GO:0016021;GO:0016020;GO:0006811;GO:0035725;GO:0048545	ligand-gated sodium channel activity;sodium ion transport;sodium channel activity;integral component of membrane;membrane;ion transport;sodium ion transmembrane transport;response to steroid hormone	molecular_function;biological_process;cellular_component	PTHR11690_SF128	ACID SENSING ION CHANNEL 2 ASIC2 AMILORIDE SENSITIVE BRAIN SODIUM CHANNEL AMILORIDE SENSITIVE CATION CHANNEL 1 NEURONAL AMILORIDE SENSITIVE CATION CHANNEL NEURONAL 1 BRAIN SODIUM CHANNEL 1 BNC1 BNAC1 MAMMALIAN DEGENERIN HOMOLOG MDEG	GO:0005575;GO:0022857;GO:0003674;GO:0006810;GO:0055085	cellular_component;transmembrane transporter activity;molecular_function;transport;transmembrane transport
ENSONIG00000000823	WD repeat domain 20b	wdr20b	61.3402	57.8328	1.05903	0.0827387	5.94163	0.5268	0.467955	0.999804	2	protein_coding	ZDB-GENE-041014-234			GO:0005515	protein binding	molecular_function	PTHR14107	PROBABLE CATABOLITE REPRESSION CREC	GO:0003674	molecular_function
ENSONIG00000000824	mitogen-activated protein kinase kinase kinase 21	map3k21	13.3629	13.9797	-1.04628	-0.0652649	3.81748	0.172209	0.678156	0.999804	2	protein_coding	ZDB-GENE-090312-24	100689980	I3IWQ9;I3IWQ8	GO:0004709;GO:0006468;GO:0004672;GO:0005524;GO:0005515;GO:0016740;GO:0000166;GO:0004674;GO:0016301;GO:0016310;GO:0000165;GO:0000186	MAP kinase kinase kinase activity;protein phosphorylation;protein kinase activity;ATP binding;protein binding;transferase activity;nucleotide binding;protein serine/threonine kinase activity;kinase activity;phosphorylation;MAPK cascade;activation of MAPKK activity	molecular_function;biological_process	PTHR23257_SF418	MITOGEN ACTIVATED KINASE KINASE KINASE 21 EC_2.7.11.25 MITOGEN ACTIVATED KINASE KINASE KINASE MLK4 MIXED LINEAGE KINASE 4	GO:0003674;GO:0043167;GO:0016301;GO:0006464;GO:0007165	molecular_function;ion binding;kinase activity;cellular protein modification process;signal transduction
ENSONIG00000000825	fibronectin type III domain-containing protein 3B	fndc3ba	50.0212	57.3783	-1.14926	-0.2007	5.71526	2.53612	0.111268	0.999804	1	protein_coding	ZDB-GENE-070510-1	100699012	I3IWR0	GO:0005515;GO:0016020;GO:0016021	protein binding;membrane;integral component of membrane	molecular_function;cellular_component	PTHR19900_SF54	FIBRONECTIN TYPE III DOMAIN CONTAINING 3B FACTOR ADIPOCYTE DIFFERENTIATION 104 HCV NS5A BINDING 37	GO:0003674;GO:0005575	molecular_function;cellular_component
ENSONIG00000000827	membrane palmitoylated protein 3	mpp3a	84.4279	92.4839	-1.09519	-0.131176	6.43548	1.81035	0.178466	0.999804	1	protein_coding	ZDB-GENE-130530-555	100693772	I3IWR2	GO:0005515	protein binding	molecular_function	PTHR23122_SF33	MAGUK P55 SUBFAMILY MEMBER 3 DISCS LARGE HOMOLOG 3 MPP3	GO:0003674	molecular_function	00230+2.7.4.8
ENSONIG00000000828	CXXC finger protein 1a	cxxc1a	28.1161	28.8616	-1.02403	-0.0342545	4.83793	0.0701604	0.791103	0.999804	1	protein_coding	ZDB-GENE-040426-1142			GO:0008270;GO:0003677;GO:0046872;GO:0002244	zinc ion binding;DNA binding;metal ion binding;hematopoietic progenitor cell differentiation	molecular_function;biological_process	PTHR12321_SF33	CXXC TYPE ZINC FINGER 1 CPG BINDING PHD FINGER AND CXXC DOMAIN CONTAINING 1	GO:0003674;GO:0003677;GO:0043167;GO:0048856;GO:0030154	molecular_function;DNA binding;ion binding;anatomical structure development;cell differentiation
ENSONIG00000000829	ribosomal protein S29	rps29	67.2856	69.3117	-1.02988	-0.0424713	6.18146	0.0235414	0.878058	0.999804	1	protein_coding	ZDB-GENE-040622-5	100703241	I3IWR4	GO:0008270;GO:0005622;GO:0005840;GO:0006412;GO:0003735;GO:0001525;GO:0001570;GO:0030218;GO:0043009;GO:0048821;GO:0051726;GO:0060218;GO:0072332	zinc ion binding;intracellular;ribosome;translation;structural constituent of ribosome;angiogenesis;vasculogenesis;erythrocyte differentiation;chordate embryonic development;erythrocyte development;regulation of cell cycle;hematopoietic stem cell differentiation;intrinsic apoptotic signaling pathway by p53 class mediator	molecular_function;cellular_component;biological_process	PTHR12010_SF4	RIBOSOMAL S29	GO:0003674;GO:0005198;GO:0003735;GO:0009058;GO:0034641;GO:0006412;GO:0032991;GO:0005575;GO:0043226;GO:0005840;GO:0005622;GO:0043167;GO:0048646;GO:0030154;GO:0002376;GO:0042592;GO:0048856;GO:0009790;GO:0007165	molecular_function;structural molecule activity;structural constituent of ribosome;biosynthetic process;cellular nitrogen compound metabolic process;translation;protein-containing complex;cellular_component;organelle;ribosome;intracellular;ion binding;anatomical structure formation involved in morphogenesis;cell differentiation;immune system process;homeostatic process;anatomical structure develo…
ENSONIG00000000830			67.0666	68.9701	-1.02713	-0.0386143	6.16065	0.0986755	0.753425	0.999804	1	protein_coding				GO:0038026;GO:0030948;GO:0016525;GO:0043065;GO:0008285;GO:0043087;GO:0005096;GO:0007165;GO:0043547	reelin-mediated signaling pathway;negative regulation of vascular endothelial growth factor receptor signaling pathway;negative regulation of angiogenesis;positive regulation of apoptotic process;negative regulation of cell population proliferation;regulation of GTPase activity;GTPase activator activity;signal transduction;positive regulation of GTPase activity	biological_process;molecular_function	PTHR10194_SF26	DISABLED HOMOLOG 2 INTERACTING DAB2 INTERACTING ASK INTERACTING 1 DOC INTERACTIVE	GO:0007165;GO:0003674;GO:0030234;GO:0008150	signal transduction;molecular_function;enzyme regulator activity;biological_process
ENSONIG00000000831	MAM domain containing glycosylphosphatidylinositol anchor 2	MDGA2	63.9731	60.6667	1.05335	0.0749859	5.93601	0.323464	0.569533	0.999804	1	protein_coding			I3IWR6	GO:0016020;GO:0005515	membrane;protein binding	cellular_component;molecular_function	PTHR23282_SF62	MAM DOMAIN CONTAINING GLYCOSYLPHOSPHATIDYLINOSITOL ANCHOR 2 PRECURSOR MAM DOMAIN CONTAINING 1	GO:0003674;GO:0005575	molecular_function;cellular_component
ENSONIG00000000833			63.8358	63.4889	1.00606	0.00872317	5.99859	0.00752838	0.930857	0.999804	1	protein_coding				GO:0005515	protein binding	molecular_function	TF661265	UNCHARACTERIZED	GO:0003674	molecular_function
ENSONIG00000000834			11.1171	9.58035	1.15867	0.212465	3.4158	1.46966	0.225399	0.999804	1	protein_coding				GO:0051016;GO:0051014;GO:0051015;GO:0045010;GO:0005509	barbed-end actin filament capping;actin filament severing;actin filament binding;actin nucleation;calcium ion binding	biological_process;molecular_function	PTHR11977_SF29	GELSOLIN ACTIN DEPOLYMERIZING FACTOR ADF BREVIN	GO:0003674;GO:0043167;GO:0008092	molecular_function;ion binding;cytoskeletal protein binding
ENSONIG00000000835	atlastin GTPase 2	atl2	4.22901	5.55004	-1.30826	-0.387647	2.22116	2.51915	0.112471	0.999804	1	protein_coding	ZDB-GENE-030131-6505			GO:0003924;GO:0005525;GO:0016020;GO:0016021;GO:0000166	GTPase activity;GTP binding;membrane;integral component of membrane;nucleotide binding	molecular_function;cellular_component	PTHR10751_SF42	ATLASTIN 2 EC_3.6.5.- ADP RIBOSYLATION FACTOR 6 INTERACTING 2 ARL 6 INTERACTING 2 AIP 2	GO:0003674;GO:0043167;GO:0003924;GO:0005575	molecular_function;ion binding;GTPase activity;cellular_component
ENSONIG00000000836	histone deacetylase 6	hdac6	11.7388	13.2277	-1.12655	-0.171916	3.71964	1.07612	0.299567	0.999804	2	protein_coding	ZDB-GENE-030131-3232	100705804	I3IWS1;I3IWS2	GO:0008270;GO:0016787;GO:0030955;GO:0033558;GO:0042903;GO:0001525;GO:0002244;GO:0006476;GO:0060216;GO:0090042	zinc ion binding;hydrolase activity;potassium ion binding;protein deacetylase activity;tubulin deacetylase activity;angiogenesis;hematopoietic progenitor cell differentiation;protein deacetylation;definitive hemopoiesis;tubulin deacetylation	molecular_function;biological_process	PTHR10625_SF102	HISTONE DEACETYLASE EC_3.5.1.98	GO:0003674;GO:0043167;GO:0016810;GO:0048646;GO:0048856;GO:0030154;GO:0006464	molecular_function;ion binding;hydrolase activity, acting on carbon-nitrogen (but not peptide) bonds;anatomical structure formation involved in morphogenesis;anatomical structure development;cell differentiation;cellular protein modification process
ENSONIG00000000837			0.800152	0.581112	1.35266	0.435795	0.0780132	0.446241	0.504125	0.999804	1	protein_coding				GO:0007507;GO:0007043;GO:0016020;GO:0016021	heart development;cell-cell junction assembly;membrane;integral component of membrane	biological_process;cellular_component	PTHR24037	HEG PRECURSOR	GO:0022607;GO:0034330;GO:0048856;GO:0005575	cellular component assembly;cell junction organization;anatomical structure development;cellular_component
ENSONIG00000000838			0.712332	0.821547	-1.13945	-0.188343	-0.327828	0.175776	0.675028	0.999804	1	protein_coding				GO:0016020;GO:0016021	membrane;integral component of membrane	cellular_component			GO:0005575	cellular_component
ENSONIG00000000839	zinc finger protein 281	znf281a	21.0372	23.965	-1.13559	-0.183441	4.48321	1.1635	0.280742	0.999804	2	protein_coding	ZDB-GENE-131126-34	100694317	I3IWS6;I3IWS5	GO:0003676	nucleic acid binding	molecular_function	PTHR11389_SF327	ZINC FINGER 281	GO:0003674	molecular_function
ENSONIG00000000841	equilibrative nucleoside transporter 1	slc29a1a	22.3827	21.1865	1.05895	0.0826329	4.44639	0.534332	0.464791	0.999804	2	protein_coding	ZDB-GENE-050913-138	100691053	I3IWS8;I3IWS9	GO:1901642;GO:0005337;GO:0016021;GO:0016020	nucleoside transmembrane transport;nucleoside transmembrane transporter activity;integral component of membrane;membrane	biological_process;molecular_function;cellular_component	PTHR10332	EQUILIBRATIVE NUCLEOSIDE TRANSPORTER EQUILIBRATIVE NITROBENZYLMERCAPTOPURINE RIBOSIDE NUCLEOSIDE TRANSPORTER EQUILIBRATIVE NBMPR NUCLEOSIDE TRANSPORTER NUCLEOSIDE TRANSPORTER TYPE SOLUTE CARRIER FAMILY 29 MEMBER	GO:0005575;GO:0022857;GO:0003674;GO:0006810;GO:0055085	cellular_component;transmembrane transporter activity;molecular_function;transport;transmembrane transport
ENSONIG00000000842	growth hormone secretagogue receptor b	ghsrb	1.29546	1.18296	1.1244	0.169158	0.564134	0.133764	0.714561	0.999804	1	protein_coding	ZDB-GENE-090327-1			GO:0001616;GO:0016021;GO:0007186;GO:0004930;GO:0016020;GO:0007165	growth hormone secretagogue receptor activity;integral component of membrane;G protein-coupled receptor signaling pathway;G protein-coupled receptor activity;membrane;signal transduction	molecular_function;cellular_component;biological_process	PTHR24243	RECEPTOR	GO:0003674;GO:0007165;GO:0005575	molecular_function;signal transduction;cellular_component
ENSONIG00000000843	phospholipase D1	pld1a	304.197	285.295	1.06581	0.0919538	8.22554	0.958003	0.327691	0.999804	2	protein_coding	ZDB-GENE-031002-2	100699552	I3IWT2;I3IWT1	GO:0048017;GO:0006654;GO:0004630;GO:0035091;GO:0003824;GO:0016787;GO:0070290;GO:0001525;GO:0016042	inositol lipid-mediated signaling;phosphatidic acid biosynthetic process;phospholipase D activity;phosphatidylinositol binding;catalytic activity;hydrolase activity;N-acylphosphatidylethanolamine-specific phospholipase D activity;angiogenesis;lipid catabolic process	biological_process;molecular_function	PTHR18896_SF57	PHOSPHOLIPASE D1 PLD 1 EC_3.1.4.4 CHOLINE PHOSPHATASE 1 PHOSPHATIDYLCHOLINE HYDROLYZING PHOSPHOLIPASE D1	GO:0003674;GO:0043167;GO:0008289;GO:0009058;GO:0006629;GO:0007165;GO:0048646;GO:0009056	molecular_function;ion binding;lipid binding;biosynthetic process;lipid metabolic process;signal transduction;anatomical structure formation involved in morphogenesis;catabolic process	00564+3.1.4.4;00565+3.1.4.4
ENSONIG00000000844	G protein-activated inward rectifier potassium channel 1	kcnj19a	42.902	51.2973	-1.19583	-0.258007	5.54369	5.5818	0.0181481	0.999804	1	protein_coding	ZDB-GENE-060503-706	100707605	I3IWT3	GO:0015467;GO:0005242;GO:0006813;GO:0016021;GO:0016020;GO:0005244;GO:0006811;GO:0034220;GO:0034765;GO:0071805	G-protein activated inward rectifier potassium channel activity;inward rectifier potassium channel activity;potassium ion transport;integral component of membrane;membrane;voltage-gated ion channel activity;ion transport;ion transmembrane transport;regulation of ion transmembrane transport;potassium ion transmembrane transport	molecular_function;biological_process;cellular_component	PTHR11767	INWARD RECTIFIER POTASSIUM CHANNEL INWARD RECTIFIER K + CHANNEL POTASSIUM CHANNEL INWARDLY RECTIFYING SUBFAMILY J MEMBER	GO:0005575;GO:0006810;GO:0022857;GO:0003674;GO:0055085	cellular_component;transport;transmembrane transporter activity;molecular_function;transmembrane transport
ENSONIG00000000845			6.19472	7.29788	-1.17156	-0.228426	2.74701	1.32609	0.249502	0.999804	1	protein_coding							PTHR21705	UNKNOWN
ENSONIG00000000846	transmembrane protein 98	tmem98	2.93374	4.55434	-1.55261	-0.634696	1.86671	0.442365	0.505983	0.999804	1	protein_coding	ZDB-GENE-070112-1092	100694584	I3IWT5	GO:0016020;GO:0016021	membrane;integral component of membrane	cellular_component	PTHR32510	TRANSMEMBRANE 98	GO:0005575	cellular_component
ENSONIG00000000847	supervillin c	svilc	1.22055	1.23088	1.0093	0.0133577	0.475324	0.000726597	0.978495	0.999804	1	protein_coding	ZDB-GENE-041008-237			GO:0007010;GO:0051015;GO:0003779	cytoskeleton organization;actin filament binding;actin binding	biological_process;molecular_function	PTHR11977_SF19	SUPERVILLIN	GO:0003674;GO:0008092;GO:0007010	molecular_function;cytoskeletal protein binding;cytoskeleton organization
ENSONIG00000000848	cyclin-dependent kinase 4	cdk21	1.55404	1.65795	-1.06621	-0.0924881	0.773338	0.0394857	0.84249	0.999804	1	protein_coding	ZDB-GENE-131121-149	100695113	I3IWT7	GO:0006468;GO:0004672;GO:0005524;GO:0000166;GO:0004674	protein phosphorylation;protein kinase activity;ATP binding;nucleotide binding;protein serine/threonine kinase activity	biological_process;molecular_function	PTHR24056_SF164	CYCLIN DEPENDENT KINASE 21	GO:0003674;GO:0043167;GO:0016301;GO:0006464	molecular_function;ion binding;kinase activity;cellular protein modification process
ENSONIG00000000849	FKBP prolyl isomerase 3	fkbp3	33.4578	31.8017	1.04969	0.06997	5.04784	0.397393	0.528439	0.999804	1	protein_coding	ZDB-GENE-030616-419	100704323	I3IWT8	GO:0003755;GO:0016853;GO:0000413	peptidyl-prolyl cis-trans isomerase activity;isomerase activity;protein peptidyl-prolyl isomerization	molecular_function;biological_process	PTHR10516_SF290	PEPTIDYL PROLYL CIS TRANS ISOMERASE FKBP3 PPIASE FKBP3 EC_5.2.1.8.25 KDA FK506 BINDING 25 KDA FKBP FKBP 25 FK506 BINDING 3 FKBP 3 IMMUNOPHILIN FKBP25 RAPAMYCIN SELECTIVE 25 KDA IMMUNOPHILIN ROTAMASE	GO:0016853;GO:0006464	isomerase activity;cellular protein modification process
ENSONIG00000000850	retinol saturase	retsat	64.1144	73.5305	-1.1471	-0.197993	6.13265	2.20669	0.137414	0.999804	1	protein_coding	ZDB-GENE-050320-11	100707878	I3IWT9	GO:0005092;GO:0007264;GO:0016020;GO:0016021;GO:0050790	GDP-dissociation inhibitor activity;small GTPase mediated signal transduction;membrane;integral component of membrane;regulation of catalytic activity	molecular_function;biological_process;cellular_component	PTHR10668_SF61	ALL TRANS RETINOL 13 14 REDUCTASE PRECURSOR EC_1.3.99.23 ALL TRANS 13 14 DIHYDRORETINOL SATURASE RETSAT PPAR ALPHA REGULATED AND STARVATION INDUCED GENE	GO:0007165;GO:0003674;GO:0030234;GO:0005575;GO:0008150	signal transduction;molecular_function;enzyme regulator activity;cellular_component;biological_process
ENSONIG00000000851			7.08254	7.37998	-1.04713	-0.066445	2.92192	0.0922789	0.7613	0.999804	1	protein_coding				GO:0003676	nucleic acid binding	molecular_function	PTHR24408_SF16	UNCHARACTERIZED	GO:0003674	molecular_function
ENSONIG00000000852	adenylosuccinate synthase	adss	19.6666	19.1017	1.02981	0.0423774	4.28546	0.0680853	0.794145	0.999804	1	protein_coding	ZDB-GENE-050417-337		I3IWU1	GO:0006167;GO:0006164;GO:0004019;GO:0005737;GO:0005525;GO:0000166;GO:0046872;GO:0000287;GO:0016874;GO:0044208	AMP biosynthetic process;purine nucleotide biosynthetic process;adenylosuccinate synthase activity;cytoplasm;GTP binding;nucleotide binding;metal ion binding;magnesium ion binding;ligase activity;'de novo' AMP biosynthetic process	biological_process;molecular_function;cellular_component	PTHR11846	ADENYLOSUCCINATE SYNTHETASE AMPSASE ADSS EC_6.3.4.4 IMP ASPARTATE LIGASE	GO:0003674;GO:0043167;GO:0005575;GO:0005737;GO:0016874;GO:0009058;GO:0044281;GO:0034641	molecular_function;ion binding;cellular_component;cytoplasm;ligase activity;biosynthetic process;small molecule metabolic process;cellular nitrogen compound metabolic process	00230+6.3.4.4;00250+6.3.4.4
ENSONIG00000000853			161.25	168.784	-1.04634	-0.0653537	7.36055	0.418318	0.517778	0.999804	1	protein_coding				GO:0072583;GO:0003924;GO:0005525;GO:0000166	clathrin-dependent endocytosis;GTPase activity;GTP binding;nucleotide binding	biological_process;molecular_function	PTHR11566_SF32	DYNAMIN 1 EC_3.6.5.5	GO:0003674;GO:0043167;GO:0003924;GO:0006810;GO:0016192	molecular_function;ion binding;GTPase activity;transport;vesicle-mediated transport
ENSONIG00000000855	N-myristoyltransferase 1	nmt1a	152.98	152.032	1.00603	0.00866873	7.26601	0.00737074	0.931583	0.999804	1	protein_coding	ZDB-GENE-050522-477	100708149	I3IWU4	GO:0006499;GO:0004379;GO:0016740;GO:0016746	N-terminal protein myristoylation;glycylpeptide N-tetradecanoyltransferase activity;transferase activity;transferase activity, transferring acyl groups	biological_process;molecular_function	PTHR11377	GLYCYLPEPTIDE N TETRADECANOYLTRANSFERASE EC_2.3.1.97 MYRISTOYL COA:PROTEIN N MYRISTOYLTRANSFERASE NMT PEPTIDE N MYRISTOYLTRANSFERASE	GO:0016746;GO:0006464	transferase activity, transferring acyl groups;cellular protein modification process
ENSONIG00000000856	synaptophysin a	sypa (1 of many)	158.51	161.853	-1.02156	-0.030777	7.34837	0.0996802	0.752214	0.999804	1	protein_coding	ZDB-GENE-031104-2			GO:0048168;GO:0008021;GO:0016020;GO:0016021	regulation of neuronal synaptic plasticity;synaptic vesicle;membrane;integral component of membrane	biological_process;cellular_component	PTHR10306	SYNAPTOPHYSIN	GO:0005575;GO:0043226;GO:0031410	cellular_component;organelle;cytoplasmic vesicle
ENSONIG00000000857	TRAF2 and NCK interacting kinase a	tnika	65.9956	74.025	-1.12091	-0.164674	6.04135	2.63425	0.104582	0.999804	2	protein_coding	ZDB-GENE-030131-3767			GO:0006468;GO:0004672;GO:0005524	protein phosphorylation;protein kinase activity;ATP binding	biological_process;molecular_function	PTHR24361_SF196	MISSHAPEN KINASE 1 EC_2.7.11.1 GCK FAMILY KINASE MINK MAPK/ERK KINASE KINASE KINASE 6 MEK KINASE KINASE 6 MEKKK 6 MISSHAPEN/NIK RELATED KINASE MITOGEN ACTIVATED KINASE KINASE KINASE KINASE 6	GO:0003674;GO:0043167;GO:0016301;GO:0006464	molecular_function;ion binding;kinase activity;cellular protein modification process
ENSONIG00000000858	synaptophysin	sypa (1 of many)	1487.18	1490.86	-1.00247	-0.00356217	10.5454	0.00181433	0.966024	0.999804	2	protein_coding	ZDB-GENE-031104-2	100700952	I3IWU8;I3IWU9	GO:0048168;GO:0008021;GO:0016020;GO:0016021	regulation of neuronal synaptic plasticity;synaptic vesicle;membrane;integral component of membrane	biological_process;cellular_component	PTHR10306	SYNAPTOPHYSIN	GO:0005575;GO:0043226;GO:0031410	cellular_component;organelle;cytoplasmic vesicle
ENSONIG00000000859	pre-mRNA processing factor 39	prpf39	113.366	121.669	-1.07229	-0.10069	6.89784	1.44735	0.228953	0.999804	2	protein_coding	ZDB-GENE-030616-420	100694929	I3IWV0;I3IWV1	GO:0006396;GO:0005515	RNA processing;protein binding	biological_process;molecular_function	PTHR17204_SF21	PRE PROCESSING FACTOR 39 PRP39 HOMOLOG	GO:0003674;GO:0034641	molecular_function;cellular nitrogen compound metabolic process
ENSONIG00000000860	phospholipase C delta 3	plcd3a	131.963	147.497	-1.11777	-0.160624	7.10552	2.03138	0.154081	0.999804	1	protein_coding	ZDB-GENE-070620-1	100695378	I3IWV2	GO:0001525;GO:0004435;GO:0006629;GO:0042127;GO:0008081;GO:0035556;GO:0005509;GO:0007165;GO:0016787;GO:0016042	angiogenesis;phosphatidylinositol phospholipase C activity;lipid metabolic process;regulation of cell population proliferation;phosphoric diester hydrolase activity;intracellular signal transduction;calcium ion binding;signal transduction;hydrolase activity;lipid catabolic process	biological_process;molecular_function	PTHR10336_SF33	1 PHOSPHATIDYLINOSITOL 4 5 BISPHOSPHATE PHOSPHODIESTERASE DELTA 3 EC_3.1.4.11 PHOSPHOINOSITIDE PHOSPHOLIPASE C DELTA 3 PHOSPHOLIPASE C DELTA 3 PLC DELTA 3	GO:0007165;GO:0003674;GO:0043167;GO:0006629;GO:0048646;GO:0009056	signal transduction;molecular_function;ion binding;lipid metabolic process;anatomical structure formation involved in morphogenesis;catabolic process	00562+3.1.4.11;04070+3.1.4.11
ENSONIG00000000861	calcium channel, voltage-dependent, L type, alpha 1F subunit	cacna1fb	3.47143	5.27793	-1.50775	-0.592401	2.10024	2.61158	0.106086	0.999804	1	protein_coding	ZDB-GENE-031104-1			GO:0050856;GO:0043029;GO:0008331;GO:0005891;GO:0070588;GO:0005245;GO:0005216;GO:0006811;GO:0007601;GO:0055085;GO:0016020;GO:0016021;GO:0005244;GO:0034765;GO:0005262;GO:0006816	regulation of T cell receptor signaling pathway;T cell homeostasis;high voltage-gated calcium channel activity;voltage-gated calcium channel complex;calcium ion transmembrane transport;voltage-gated calcium channel activity;ion channel activity;ion transport;visual perception;transmembrane transport;membrane;integral component of membrane;voltage-gated ion channel activity;regulation of ion trans…	biological_process;molecular_function;cellular_component	PTHR10037_SF184	VOLTAGE DEPENDENT L TYPE CALCIUM CHANNEL SUBUNIT ALPHA 1F VOLTAGE GATED CALCIUM CHANNEL SUBUNIT ALPHA CAV1 4	GO:0005575;GO:0006810;GO:0055085;GO:0050877;GO:0022857;GO:0003674;GO:0032991;GO:0002376;GO:0042592	cellular_component;transport;transmembrane transport;nervous system process;transmembrane transporter activity;molecular_function;protein-containing complex;immune system process;homeostatic process
ENSONIG00000000862	zinc finger and BTB domain containing 18	zbtb18	1066.41	1002.7	1.06351	0.0888355	10.0141	0.874145	0.34981	0.999804	1	protein_coding	ZDB-GENE-050419-73	100691592	I3IWV4	GO:0003676;GO:0005515	nucleic acid binding;protein binding	molecular_function	PTHR11389_SF358	ZINC FINGER AND BTB DOMAIN CONTAINING 18 ZINC FINGER 238	GO:0003674	molecular_function
ENSONIG00000000863	v-akt murine thymoma viral oncogene homolog 3a	akt3a	38.6729	37.62	1.03061	0.0434956	5.19849	0.070437	0.790702	0.999804	1	protein_coding	ZDB-GENE-050419-180			GO:0035556;GO:0004674;GO:0006468;GO:0004672;GO:0005524;GO:0016740;GO:0000166;GO:0016301;GO:0016310	intracellular signal transduction;protein serine/threonine kinase activity;protein phosphorylation;protein kinase activity;ATP binding;transferase activity;nucleotide binding;kinase activity;phosphorylation	biological_process;molecular_function	PTHR24352_SF29	RAC GAMMA SERINE/THREONINE KINASE EC_2.7.11.1 KINASE AKT 3 KINASE B GAMMA PKB GAMMA RAC PK GAMMA	GO:0003674;GO:0043167;GO:0016301;GO:0006464;GO:0007165	molecular_function;ion binding;kinase activity;cellular protein modification process;signal transduction	04151+2.7.11.1;04150+2.7.11.1;05165+2.7.11.1;04926+2.7.11.1;04714+2.7.11.1;05170+2.7.11.1;05163+2.7.11.1
ENSONIG00000000864			54.3095	58.2863	-1.07455	-0.103734	5.77316	0.971751	0.324244	0.999804	1	protein_coding				GO:0005525;GO:0000166	GTP binding;nucleotide binding	molecular_function	PTHR11711_SF151	ADP RIBOSYLATION FACTOR 6	GO:0003674;GO:0043167	molecular_function;ion binding
ENSONIG00000000865	E3 ubiquitin-protein ligase pellino homolog 2		20.5631	20.4152	1.0023	0.0033144	4.54903	0.000311468	0.985919	0.999804	1	protein_coding		100704859	I3IWV7	GO:0008592;GO:0000209;GO:0061630	regulation of Toll signaling pathway;protein polyubiquitination;ubiquitin protein ligase activity	biological_process;molecular_function	PTHR12098	E3 UBIQUITIN LIGASE PELLINO HOMOLOG PELLINO EC_2.3.2.27 RING TYPE E3 UBIQUITIN TRANSFERASE PELLINO HOMOLOG	GO:0006464	cellular protein modification process
ENSONIG00000000867	serologically defined colon cancer antigen 8	sdccag8	13.1604	12.7262	1.0301	0.0427872	3.70643	0.0798853	0.777453	0.999804	1	protein_coding	ZDB-GENE-090313-318			GO:0007098;GO:0005813	centrosome cycle;centrosome	biological_process;cellular_component	TF617908	SEROLOGICALLY DEFINED COLON CANCER ANTIGEN 8 HOMOLOG	GO:0005575;GO:0005815;GO:0007010	cellular_component;microtubule organizing center;cytoskeleton organization
ENSONIG00000000868	Rho GTPase activating protein 23a	arhgap23a	25.4271	23.8088	1.07123	0.0992704	4.55209	0.264908	0.606768	0.999804	1	protein_coding	ZDB-GENE-121019-1			GO:0007165;GO:0005515;GO:0005096;GO:0043547	signal transduction;protein binding;GTPase activator activity;positive regulation of GTPase activity	biological_process;molecular_function	PTHR23175_SF5	RHO GTPASE ACTIVATING 23 RHO TYPE GTPASE ACTIVATING 23	GO:0003674;GO:0007165;GO:0030234	molecular_function;signal transduction;enzyme regulator activity
ENSONIG00000000869	N(alpha)-acetyltransferase 30, NatC catalytic subunit	naa30	25.5547	26.9008	-1.05262	-0.0739811	4.69677	0.351575	0.553223	0.999804	1	protein_coding	ZDB-GENE-081022-73	100695200	I3IWW1				PTHR23091_SF209	N ALPHA ACETYLTRANSFERASE 30 EC_2.3.1.256 N ACETYLTRANSFERASE 12 N ACETYLTRANSFERASE MAK3 HOMOLOG NATC CATALYTIC SUBUNIT
ENSONIG00000000870	actin related protein 10 homolog	actr10	170.002	164.592	1.03283	0.0465978	7.40016	0.336395	0.561918	0.999804	1	protein_coding	ZDB-GENE-040426-768	100705569	I3IWW2	GO:0014003;GO:0032289;GO:0098958;GO:1904115	oligodendrocyte development;central nervous system myelin formation;retrograde axonal transport of mitochondrion;axon cytoplasm	biological_process;cellular_component	PTHR11937_SF14	ACTIN RELATED 10 ACTIN RELATED 11	GO:0048856;GO:0030154;GO:0022607;GO:0048646;GO:0006810;GO:0030705;GO:0005737	anatomical structure development;cell differentiation;cellular component assembly;anatomical structure formation involved in morphogenesis;transport;cytoskeleton-dependent intracellular transport;cytoplasm
ENSONIG00000000871	TNF alpha induced protein 3	tnfaip3	71.7323	64.8204	1.10604	0.14541	6.11032	1.23501	0.266434	0.999804	2	protein_coding	ZDB-GENE-100212-2	100692128	I3IWW4;I3IWW3	GO:0016567;GO:0008270;GO:0016579;GO:0003677;GO:1904888	protein ubiquitination;zinc ion binding;protein deubiquitination;DNA binding;cranial skeletal system development	biological_process;molecular_function	PTHR13367_SF3	TUMOR NECROSIS FACTOR ALPHA INDUCED 3 TNF ALPHA INDUCED 3 EC_2.3.2.- EC_3.4.19.12 DNA BINDING A20 ZINC FINGER A20	GO:0003674;GO:0003677;GO:0006464;GO:0043167;GO:0048856	molecular_function;DNA binding;cellular protein modification process;ion binding;anatomical structure development
ENSONIG00000000873			9.83091	9.45339	1.04706	0.066339	3.27117	0.143978	0.704358	0.999804	1	protein_coding				GO:0005085;GO:0007264;GO:0005622	guanyl-nucleotide exchange factor activity;small GTPase mediated signal transduction;intracellular	molecular_function;biological_process;cellular_component	PTHR23113_SF40	GUANINE NUCLEOTIDE FACTOR CRK SH3 BINDING GNRP	GO:0005575;GO:0005622;GO:0007165;GO:0003674	cellular_component;intracellular;signal transduction;molecular_function
ENSONIG00000000874	vascular endothelial growth factor A		0.837356	0.916893	-1.13094	-0.17752	0.139803	0.136974	0.711308	0.999804	1	protein_coding		100695462	I3IWW7	GO:0008083;GO:0016020;GO:0010469	growth factor activity;membrane;regulation of signaling receptor activity	molecular_function;cellular_component;biological_process			GO:0005575;GO:0003674;GO:0008150	cellular_component;molecular_function;biological_process
ENSONIG00000000875	CLOCK-interacting pacemaker	cipcb	91.201	87.429	1.04302	0.060767	6.47342	0.153183	0.695511	0.999804	1	protein_coding	ZDB-GENE-091204-292	102078743	I3IWW8	GO:0045892;GO:0042754	negative regulation of transcription, DNA-templated;negative regulation of circadian rhythm	biological_process	TF332579	CLOCK INTERACTING PACEMAKER CLOCK INTERACTING CIRCADIAN
ENSONIG00000000876	zinc finger protein 410	znf410	24.0143	22.2235	1.08362	0.115856	4.50743	0.82354	0.364147	0.999804	2	protein_coding	ZDB-GENE-040426-1817	100705831	I3IWW9;I3IWX0	GO:0003676	nucleic acid binding	molecular_function	PTHR11389_SF363	ZINC FINGER 410 ANOTHER PARTNER ARF 1 ZINC FINGER APA 1	GO:0003674	molecular_function
ENSONIG00000000877	LIM and SH3 protein 1	lasp1	66.4024	64.2164	1.03535	0.0501237	6.01988	0.20446	0.651145	0.999804	1	protein_coding	ZDB-GENE-030131-1936	100708417	I3IWX1	GO:0005515;GO:0046872	protein binding;metal ion binding	molecular_function	PTHR11039_SF3	LIM AND SH3 DOMAIN 1 LASP 1	GO:0003674;GO:0043167	molecular_function;ion binding
ENSONIG00000000878	ectonucleoside triphosphate diphosphohydrolase 5b	entpd5b	27.0094	24.0569	1.12217	0.166296	4.67206	1.70926	0.191082	0.999804	1	protein_coding	ZDB-GENE-091118-88			GO:0016787	hydrolase activity	molecular_function	PTHR11782	ECTONUCLEOSIDE TRIPHOSPHATE DIPHOSPHOHYDROLASE NTPDASE
ENSONIG00000000879	eukaryotic translation initiation factor 5A-1		149.165	148.693	1.00347	0.00499052	7.22645	0.00340455	0.953471	0.999804	1	protein_coding		100700271	I3IWX3	GO:0045905;GO:0045901;GO:0006452;GO:0043022;GO:0003746;GO:0003723;GO:0006412	positive regulation of translational termination;positive regulation of translational elongation;translational frameshifting;ribosome binding;translation elongation factor activity;RNA binding;translation	biological_process;molecular_function	PTHR11673	EUKARYOTIC TRANSLATION INITIATION FACTOR 5A EIF 5A	GO:0003674;GO:0003723;GO:0009058;GO:0008135;GO:0034641;GO:0006412	molecular_function;RNA binding;biosynthetic process;translation factor activity, RNA binding;cellular nitrogen compound metabolic process;translation
ENSONIG00000000880	plexin domain-containing protein 1	PLXDC1	9.99358	10.0752	-1.01618	-0.0231537	3.31095	0.0111881	0.915762	0.999804	1	protein_coding		100696167	I3IWX4	GO:0001525;GO:0016020;GO:0016021	angiogenesis;membrane;integral component of membrane	biological_process;cellular_component	PTHR13055	PLEXIN DOMAIN CONTAINING PRECURSOR TUMOR ENDOTHELIAL MARKER 7	GO:0048646;GO:0005575	anatomical structure formation involved in morphogenesis;cellular_component
ENSONIG00000000881	PERP, TP53 apoptosis effector	perp	165.2	151.456	1.09028	0.124698	7.31733	1.63349	0.201221	0.999804	1	protein_coding	ZDB-GENE-050104-1	100692399	I3IWX5	GO:0016021;GO:0016020;GO:0009411;GO:0042981;GO:1902262	integral component of membrane;membrane;response to UV;regulation of apoptotic process;apoptotic process involved in blood vessel morphogenesis	cellular_component;biological_process	PTHR14399	TRANSMEMBRANE 47 TRANSMEMBRANE 4 SUPERFAMILY MEMBER 10	GO:0005575;GO:0008219	cellular_component;cell death
ENSONIG00000000882	solute carrier family 7 member 14	slc7a14a	132.791	126.102	1.05243	0.0737208	7.01389	0.509476	0.475366	0.999804	1	protein_coding	ZDB-GENE-070912-112	100692608	I3IWX6	GO:0055085;GO:0022857;GO:0016020;GO:0016021;GO:0001654	transmembrane transport;transmembrane transporter activity;membrane;integral component of membrane;eye development	biological_process;molecular_function;cellular_component	PTHR11785_SF250	PROBABLE CATIONIC AMINO ACID TRANSPORTER SOLUTE CARRIER FAMILY 7 MEMBER 14	GO:0005575;GO:0022857;GO:0003674;GO:0006810;GO:0055085;GO:0048856	cellular_component;transmembrane transporter activity;molecular_function;transport;transmembrane transport;anatomical structure development
ENSONIG00000000883	transmembrane protein 26a	tmem26a	3.40054	2.94238	1.14091	0.190185	1.75967	0.374426	0.540602	0.999804	1	protein_coding	ZDB-GENE-101223-2		I3IWX7	GO:0016020;GO:0016021	membrane;integral component of membrane	cellular_component	PTHR22168	TRANSMEMBRANE 26	GO:0005575	cellular_component
ENSONIG00000000884	methylmalonate-semialdehyde dehydrogenase		154.012	137.448	1.12233	0.166496	7.2249	2.43571	0.1186	0.999804	2	protein_coding		100706096	I3IWX9;I3IWX8	GO:0004491;GO:0016620;GO:0055114;GO:0016491	methylmalonate-semialdehyde dehydrogenase (acylating) activity;oxidoreductase activity, acting on the aldehyde or oxo group of donors, NAD or NADP as acceptor;oxidation-reduction process;oxidoreductase activity	molecular_function;biological_process	PTHR11699_SF27	METHYLMALONATE SEMIALDEHYDE DEHYDROGENASE [ACYLATING] MITOCHONDRIAL PRECURSOR MMSDH MALONATE SEMIALDEHYDE DEHYDROGENASE [ACYLATING] EC_1.2.1.18 EC_1.2.1.- 27 ALDEHYDE DEHYDROGENASE FAMILY 6 MEMBER A1	GO:0016491	oxidoreductase activity	00280+1.2.1.27;00640+1.2.1.27
ENSONIG00000000886	transmembrane protein 26	TMEM26 (1 of many)	1.38239	2.15571	-1.57853	-0.658581	0.837505	1.60235	0.205571	0.999804	1	protein_coding		100692945	I3IWY1	GO:0016020;GO:0016021	membrane;integral component of membrane	cellular_component	PTHR22168	TRANSMEMBRANE 26	GO:0005575	cellular_component
ENSONIG00000000887	claudin-11	cldn11a	43.7684	35.7904	1.22181	0.289025	5.33604	2.57721	0.108413	0.999804	1	protein_coding	ZDB-GENE-040718-369	100700549	I3IWY2	GO:0005198;GO:0005923;GO:0016021;GO:0016020;GO:0005886;GO:0030054	structural molecule activity;bicellular tight junction;integral component of membrane;membrane;plasma membrane;cell junction	molecular_function;cellular_component	PTHR12002_SF6	CLAUDIN 11	GO:0005575;GO:0003674;GO:0005198;GO:0005886	cellular_component;molecular_function;structural molecule activity;plasma membrane
ENSONIG00000000888	glutamate receptor, ionotropic, N-methyl-D-aspartate 3Ba	grin3ba	10.07	10.7319	-1.0634	-0.0886805	3.41281	0.218564	0.640137	0.999804	2	protein_coding	ZDB-GENE-070912-354			GO:0038023;GO:0005216;GO:0004970;GO:0006811;GO:0016020;GO:0016021;GO:0034220;GO:0005886;GO:0035235	signaling receptor activity;ion channel activity;ionotropic glutamate receptor activity;ion transport;membrane;integral component of membrane;ion transmembrane transport;plasma membrane;ionotropic glutamate receptor signaling pathway	molecular_function;biological_process;cellular_component	PTHR18966_SF154	GLUTAMATE RECEPTOR IONOTROPIC NMDA 3B PRECURSOR GLUN3B N METHYL D ASPARTATE RECEPTOR NMDAR3B NR3B	GO:0005575;GO:0006810;GO:0022857;GO:0003674;GO:0055085;GO:0005886;GO:0007165	cellular_component;transport;transmembrane transporter activity;molecular_function;transmembrane transport;plasma membrane;signal transduction
ENSONIG00000000889			38.7138	39.4674	-1.01978	-0.0282617	5.27466	0.034043	0.853615	0.999804	1	protein_coding				GO:0005634;GO:0006355;GO:0003677	nucleus;regulation of transcription, DNA-templated;DNA binding	cellular_component;biological_process;molecular_function	PTHR13964_SF2	AT RICH INTERACTIVE DOMAIN CONTAINING 5B ARID DOMAIN CONTAINING 5B	GO:0003674;GO:0003677;GO:0005575;GO:0043226;GO:0005634	molecular_function;DNA binding;cellular_component;organelle;nucleus
ENSONIG00000000890	ADP-ribosylation factor-like 5C	arl5c	8.4125	7.65755	1.09789	0.13474	2.9999	0.322105	0.570345	0.999804	1	protein_coding	ZDB-GENE-040426-1866			GO:0005525;GO:0000166	GTP binding;nucleotide binding	molecular_function	PTHR11711_SF103	ADP RIBOSYLATION FACTOR	GO:0003674;GO:0043167	molecular_function;ion binding
ENSONIG00000000891	rhotekin 2a	rtkn2a	1.36296	1.47573	-1.07525	-0.104674	0.776502	0.0256789	0.872687	0.999804	2	protein_coding	ZDB-GENE-041010-225			GO:0030097	hemopoiesis	biological_process	PTHR21538_SF21	RHOTEKIN 2 PLECKSTRIN HOMOLOGY DOMAIN CONTAINING FAMILY K MEMBER 1 PH DOMAIN CONTAINING FAMILY K MEMBER 1	GO:0048856	anatomical structure development
ENSONIG00000000892	calcium channel, voltage-dependent, beta 1 subunit	cacnb1	75.2817	75.7531	-1.00638	-0.00917306	6.20837	0.00658929	0.935303	0.999804	1	protein_coding	ZDB-GENE-040718-399			GO:0005891;GO:0070588;GO:0005245;GO:0005515;GO:0006936;GO:0070978	voltage-gated calcium channel complex;calcium ion transmembrane transport;voltage-gated calcium channel activity;protein binding;muscle contraction;voltage-gated calcium channel complex assembly	cellular_component;biological_process;molecular_function	PTHR11824	VOLTAGE DEPENDENT L TYPE CALCIUM CHANNEL SUBUNIT BETA CALCIUM CHANNEL VOLTAGE DEPENDENT SUBUNIT BETA	GO:0003674;GO:0022857;GO:0006810;GO:0055085;GO:0032991;GO:0005575;GO:0022607;GO:0065003	molecular_function;transmembrane transporter activity;transport;transmembrane transport;protein-containing complex;cellular_component;cellular component assembly;protein-containing complex assembly
ENSONIG00000000893	phospholipid phosphatase related 3a	plppr3a	31.7999	31.1608	1.02017	0.0288123	4.90024	0.0208088	0.885301	0.999804	1	protein_coding	ZDB-GENE-070912-555			GO:0016020;GO:0016021	membrane;integral component of membrane	cellular_component	PTHR10165_SF14	PHOSPHOLIPID PHOSPHATASE RELATED TYPE 3 EC_3.1.3.4 LIPID PHOSPHATE PHOSPHATASE RELATED TYPE 3 PLASTICITY RELATED GENE 2 PRG 2	GO:0005575	cellular_component
ENSONIG00000000894	leucine rich repeat and fibronectin type III domain containing 5b	lrfn5b	21.5431	21.7152	-1.00729	-0.0104762	4.47381	0.00847546	0.926649	0.999804	1	protein_coding	ZDB-GENE-080327-20			GO:0005515;GO:0016020;GO:0016021	protein binding;membrane;integral component of membrane	molecular_function;cellular_component	PTHR24373_SF117	LEUCINE RICH REPEAT AND FIBRONECTIN TYPE III DOMAIN CONTAINING 5	GO:0003674;GO:0005575	molecular_function;cellular_component
ENSONIG00000000895	centrosomal protein 170Aa	cep170aa	83.6021	88.0241	-1.05267	-0.0740531	6.43077	0.49788	0.480433	0.999804	1	protein_coding	ZDB-GENE-090312-109			GO:0005515	protein binding	molecular_function	PTHR15715_SF17	UNKNOWN	GO:0003674	molecular_function
ENSONIG00000000896	YY1 transcription factor b	yy1b	64.955	69.5159	-1.07195	-0.100238	6.05548	0.993115	0.318982	0.999804	1	protein_coding	ZDB-GENE-040426-2127			GO:0003676;GO:0046890;GO:0070328	nucleic acid binding;regulation of lipid biosynthetic process;triglyceride homeostasis	molecular_function;biological_process	PTHR14003_SF10	TRANSCRIPTION FACTOR YY2 YIN AND YANG 2 YY 2	GO:0003674;GO:0042592	molecular_function;homeostatic process
ENSONIG00000000897	paralemmin-1	palm1b	54.9999	50.0919	1.09628	0.132619	5.72393	1.89291	0.168874	0.999804	2	protein_coding	ZDB-GENE-040426-1147	100700813	I3IWZ5;I3IWZ4	GO:0008360;GO:0016020	regulation of cell shape;membrane	biological_process;cellular_component	PTHR10498_SF9	PARALEMMIN 1 PRECURSOR PARALEMMIN	GO:0005575;GO:0008150	cellular_component;biological_process
ENSONIG00000000898	Enah/Vasp-like b	evlb	20.6071	19.2398	1.07517	0.10456	4.36664	0.521012	0.47041	0.999804	1	protein_coding	ZDB-GENE-040426-1804			GO:0051289;GO:0008154;GO:0017124;GO:0005856;GO:0045010;GO:0003779	protein homotetramerization;actin polymerization or depolymerization;SH3 domain binding;cytoskeleton;actin nucleation;actin binding	biological_process;molecular_function;cellular_component	PTHR11202_SF4	ENA/VASP ENA/VASODILATOR STIMULATED PHOSPHOPROTEIN	GO:0003674;GO:0008092;GO:0005575;GO:0043226;GO:0005856;GO:0022607;GO:0065003	molecular_function;cytoskeletal protein binding;cellular_component;organelle;cytoskeleton;cellular component assembly;protein-containing complex assembly
ENSONIG00000000899	polypyrimidine tract binding protein 1a	ptbp1a	25.9598	28.239	-1.0876	-0.121143	4.72522	0.436017	0.509051	0.999804	1	protein_coding	ZDB-GENE-050522-492			GO:0006397;GO:0003723;GO:0003676;GO:0005634;GO:0009953;GO:0045746;GO:0060472;GO:0060729	mRNA processing;RNA binding;nucleic acid binding;nucleus;dorsal/ventral pattern formation;negative regulation of Notch signaling pathway;positive regulation of cortical granule exocytosis by positive regulation of cytosolic calcium ion concentration;intestinal epithelial structure maintenance	biological_process;molecular_function;cellular_component	PTHR11546	POLYPYRIMIDINE TRACT BINDING	GO:0005575;GO:0043226;GO:0005634;GO:0003674;GO:0003723;GO:0034641;GO:0006397;GO:0042592	cellular_component;organelle;nucleus;molecular_function;RNA binding;cellular nitrogen compound metabolic process;mRNA processing;homeostatic process
ENSONIG00000000900	60S ribosomal protein L19	rpl19	223.881	206.405	1.08477	0.117387	7.79033	0.478619	0.489048	0.999804	1	protein_coding	ZDB-GENE-040426-2290	100709589	I3IWZ8	GO:0022625;GO:0005622;GO:0003723;GO:0005840;GO:0006412;GO:0003735	cytosolic large ribosomal subunit;intracellular;RNA binding;ribosome;translation;structural constituent of ribosome	cellular_component;molecular_function;biological_process	PTHR10722	60S RIBOSOMAL L19	GO:0003674;GO:0005198;GO:0003735;GO:0009058;GO:0034641;GO:0006412;GO:0032991;GO:0005575;GO:0043226;GO:0005840;GO:0003723;GO:0005622	molecular_function;structural molecule activity;structural constituent of ribosome;biosynthetic process;cellular nitrogen compound metabolic process;translation;protein-containing complex;cellular_component;organelle;ribosome;RNA binding;intracellular
ENSONIG00000000901	histidine triad nucleotide binding protein 1	HINT1	50.2742	54.0069	-1.07468	-0.103906	5.77343	0.597011	0.439721	0.999804	1	protein_coding		100704656	I3IWZ9	GO:0003824	catalytic activity	molecular_function	PTHR23089_SF3	HISTIDINE TRIAD NUCLEOTIDE BINDING 1 EC 3 ADENOSINE 5' MONOPHOSPHORAMIDASE KINASE C INHIBITOR 1 KINASE C INTERACTING 1 PKCI 1	GO:0003674	molecular_function
ENSONIG00000000902	alpha-2,8-sialyltransferase 8F	st8sia6 (1 of many)	3.04268	3.07989	-1.0075	-0.0107851	1.49157	0.00109855	0.973559	0.999804	1	protein_coding	ZDB-GENE-060322-9	100696434	I3IX00	GO:0006486;GO:0008373;GO:0016020;GO:0016021;GO:0016740;GO:0016757;GO:0005794;GO:0097503	protein glycosylation;sialyltransferase activity;membrane;integral component of membrane;transferase activity;transferase activity, transferring glycosyl groups;Golgi apparatus;sialylation	biological_process;molecular_function;cellular_component	PTHR11987	N ALPHA 2 8 SIALYLTRANSFERASE ALPHA 2 8 SIALYLTRANSFERASE SIALYLTRANSFERASE SIAT8 SIALYLTRANSFERASE ST8SIA	GO:0016757;GO:0006464;GO:0005575;GO:0043226;GO:0005794	transferase activity, transferring glycosyl groups;cellular protein modification process;cellular_component;organelle;Golgi apparatus
ENSONIG00000000903	dynein, cytoplasmic 2, light intermediate chain 1	dync2li1	18.7596	26.1524	-1.39463	-0.479882	4.37957	4.80972	0.0282996	0.999804	2	protein_coding	ZDB-GENE-040426-1230			GO:0005868;GO:0035735;GO:0035721;GO:0005929	cytoplasmic dynein complex;intraciliary transport involved in cilium assembly;intraciliary retrograde transport;cilium	cellular_component;biological_process	PTHR13236	CYTOPLASMIC DYNEIN 2 LIGHT INTERMEDIATE CHAIN 1	GO:0006810;GO:0030705;GO:0022607;GO:0032991;GO:0005575;GO:0043226;GO:0005929	transport;cytoskeleton-dependent intracellular transport;cellular component assembly;protein-containing complex;cellular_component;organelle;cilium
ENSONIG00000000905	ephrin-A2a	efna2a	2.43077	2.21084	1.08623	0.119324	1.32859	0.145603	0.702773	0.999804	1	protein_coding	ZDB-GENE-990415-66			GO:0048013;GO:0046875;GO:0016020;GO:0016021	ephrin receptor signaling pathway;ephrin receptor binding;membrane;integral component of membrane	biological_process;molecular_function;cellular_component	PTHR11304_SF4	EPHRIN A2 PRECURSOR ELF 1 EPH RELATED RECEPTOR TYROSINE KINASE LIGAND 6 LERK 6	GO:0005575;GO:0003674;GO:0007165	cellular_component;molecular_function;signal transduction
ENSONIG00000000906			2.13613	2.02512	1.05273	0.0741339	1.14135	0.0264209	0.870877	0.999804	2	protein_coding				GO:0005515	protein binding	molecular_function	PTHR22847_SF348	MITOGEN ACTIVATED KINASE BINDING 1	GO:0003674	molecular_function
ENSONIG00000000907	synaptosome associated protein 23	snap23.1	14.0928	13.3584	1.05589	0.0784599	3.82024	0.230639	0.63105	0.999804	2	protein_coding	ZDB-GENE-040426-883	100701356	I3IX08;I3IX07				PTHR19305	SYNAPTOSOMAL ASSOCIATED SNAP SYNAPTOSOMAL ASSOCIATED KDA
ENSONIG00000000908	MAGI family member, X-linked a	magixa	9.78595	9.64016	1.01381	0.0197853	3.3301	0.0141482	0.905318	0.999804	2	protein_coding	ZDB-GENE-060503-115			GO:0005515	protein binding	molecular_function	PTHR10316_SF41	UNKNOWN	GO:0003674	molecular_function	00230+2.7.4.8
[truncated: 16,830 more rows]

## Sheet: DEG
gene_id	gene_description	gene_name	baseMeanCPM_KT_60	baseMeanCPM_V_60	FC	logFC	logCPM	LR	PValue	FDR	transcript_count	gene_biotype	zfin_id_id	Entrez_id	Uniprot_id	go_id	go_term	go_ontology	interpro_family	interpro_family_description	goslim_goa_accession	goslim_goa_description	kegg_path_enzyme
[truncated: 1 more rows]
